# Supplementary material for: Transcriptome analysis reveals potential mechanisms and pathways underlying embryonic development with respect to muscle growth and egg production in slow and fast growing chickens
Source: Research Square preprint supplement (doi:10.21203/rs.3.rs-346155/v1), 2021-03-29
Supplement: Supplementary file 3 [file f24777dcb3ddd1faab6a57fd.xlsx]

## Sheet: 7th and 18th UP
Table S1. List of differentially expressed transcripts during embryo development stages (7th day embryo and 18th day thigh muscle) as compared to their respective control samples of control broiler.
accessions	GeneName	GeomeanFold_T1	p-value	Description	accessions	GeneName	GeomeanFold_T2	p-value	Description
ens|ENSGALT00000028263|ens|ENSGALT00000000126	ENSGALT00000028263	2.34833	5.04603e-06	Unknown		CN217303	1.79729	1.8305e-05	Target: CN217303; Description: CN217303 RJA008D02.ab1 RJbrain Gallus gallus cDNA 5', mRNA sequence; Next best Hit: CN217291(alignment length 14bp with 100.00%identity)
ens|ENSGALT00000019277|gb|CR389581|tc|TC389590|ref|XM_003641440	ENSGALT00000019277	1.41543	1.17387e-05	spectrin repeat containing, nuclear envelope 2 [Source:HGNC Symbol;Acc:17084] [ENSGALT00000019277]	ens|ENSGALT00000031799|gb|XM_419668|tc|TC380006	LRP11	2.51613	5.46613e-05	low density lipoprotein receptor-related protein 11 [Source:HGNC Symbol;Acc:16936] [ENSGALT00000031799]
ref|NM_001031290|ens|ENSGALT00000032962|ens|ENSGALT00000017833|gb|AJ720494	USP1	3.11887	1.64292e-05	Gallus gallus ubiquitin specific peptidase 1 (USP1), mRNA [NM_001031290]		CN225836	3.25717	6.8127e-05	Target: CN225836; Description: CN225836 WLA079D08.ab1 WLbrain Gallus gallus cDNA 5', mRNA sequence; Next best Hit: CN222989(alignment length 16bp with 100.00%identity)
gb|CR385802|tc|TC425147	RADIL	1.45484	2.76947e-05	Gallus gallus finished cDNA, clone ChEST64m19. [CR385802]		CN221716	1.6752	0.000133283	Target: CN221716; Description: CN221716 RJA079E10.ab1 RJbrain Gallus gallus cDNA 5', mRNA sequence; Next best Hit: CN223980(alignment length 21bp with 95.24%identity)
tc|NP9677157	NP9677157	3.16682	3.06191e-05	GB	ens|ENSGALT00000039059|ref|XM_417481	ZNF831	1.20919	0.000326094	Uncharacterized protein [Source:UniProtKB/TrEMBL;Acc:E1BSY4] [ENSGALT00000039059]
ens|ENSGALT00000041051|gb|CR405990	ENSGALT00000041051	3.91256	3.0859e-05	Uncharacterized protein [Source:UniProtKB/TrEMBL;Acc:E1BRF1] [ENSGALT00000041051]	ref|NM_001001302|ens|ENSGALT00000040711|ens|ENSGALT00000022380|ens|ENSGALT00000040713	MYH7	3.58227	0.000447219	Gallus gallus myosin, heavy chain 7, cardiac muscle, beta (MYH7), mRNA [NM_001001302]
ens|ENSGALT00000022317	SERAC1	1.85529	3.11883e-05	serine active site containing 1 [Source:HGNC Symbol;Acc:21061] [ENSGALT00000022317]	ref|NM_001001302|ens|ENSGALT00000040711|ens|ENSGALT00000022380|ens|ENSGALT00000040713	MYH7	3.78134	0.000454845	Gallus gallus myosin, heavy chain 7, cardiac muscle, beta (MYH7), mRNA [NM_001001302]
ens|ENSGALT00000008226|ens|ENSGALT00000008227|tc|TC410647|ref|XM_003642184	ENSGALT00000008226	1.37681	3.12012e-05	myosin IH [Source:HGNC Symbol;Acc:13879] [ENSGALT00000008226]	ens|ENSGALT00000017436|ens|ENSGALT00000017438	CCDC88C	2.24791	0.000521262	coiled-coil domain containing 88C [Source:HGNC Symbol;Acc:19967] [ENSGALT00000017436]
ens|ENSGALT00000010196|gb|XM_414375|tc|TC380695	UROC1	1.09004	3.40665e-05	urocanase domain containing 1 [Source:HGNC Symbol;Acc:26444] [ENSGALT00000010196]	gb|U30609|gb|XM_417201|tc|TC377701	MTNR1B	3.47674	0.000653027	Gallus gallus Mel-1b melatonin receptor mRNA, partial cds. [U30609]
ens|ENSGALT00000004113|tc|TC410694|tc|TC383276|ref|XM_422593	U2SURP	1.42911	3.41425e-05	U2 snRNP-associated SURP domain containing [Source:HGNC Symbol;Acc:30855] [ENSGALT00000004113]	gb|AJ301880	AJ301880	4.83856	0.000691137	Gallus gallus partial mRNA for heat shock protein 70 (hsp70 gene), 5'UTR, clone MT-200. [AJ301880]
gb|XM_421067|tc|NP9675894	TNKS1BP1	1.15392	3.60107e-05	PREDICTED: Gallus gallus hypothetical LOC423136 (LOC423136), mRNA [XM_421067]	gb|CR405974|tc|TC394574	CR405974	3.57716	0.000741934	Gallus gallus finished cDNA, clone ChEST1021c11. [CR405974]
	CN217227	4.11496	4.0471e-05	Target: CN217227; Description: CN217227 RJA007B09.ab1 RJbrain Gallus gallus cDNA 5', mRNA sequence; Next best Hit: CN219329(alignment length 15bp with 100.00%identity)	tc|TC385384|ref|XM_417031	TC385384	1.22299	0.000743606	Rep: A-kinase anchor protein 11 (Protein kinase A-anchoring protein 11) (PRKA11) (A kinase anchor protein 220 kDa) (AKAP 220) (hAKAP220). - Gallus gallus, partial (98%) [TC385384]
	CN222818	1.91715	4.21166e-05	Target: CN222818; Description: CN222818 RJA089C09.ab1 RJbrain Gallus gallus cDNA 5', mRNA sequence; Next best Hit: CN234799(alignment length 57bp with 91.23%identity)	ref|NM_001031124|ens|ENSGALT00000012638|gb|BX934731|gb|AJ720786	UPRT	1.39141	0.000755178	Gallus gallus uracil phosphoribosyltransferase (FUR1) homolog (S. cerevisiae) (UPRT), mRNA [NM_001031124]
ens|ENSGALT00000013840|ens|ENSGALT00000011110|gb|CR338820|gb|CR391409	ENSGALT00000013840	2.3352	6.36977e-05	collagen, type XXIV, alpha 1 [Source:HGNC Symbol;Acc:20821] [ENSGALT00000013840]	ref|NM_001030616|ens|ENSGALT00000005910|gb|AJ720720|tc|TC376309	THG1L	7.69265	0.000763559	Gallus gallus tRNA-histidine guanylyltransferase 1-like (S. cerevisiae) (THG1L), mRNA [NM_001030616]
gb|BX929832	SCAPER	1.2833	6.71215e-05	Gallus gallus finished cDNA, clone ChEST656l10. [BX929832]	ref|NM_001006471|ens|ENSGALT00000010823|gb|AJ720279|tc|TC385463	TOLLIP	6.6593	0.000830145	Gallus gallus toll interacting protein (TOLLIP), mRNA [NM_001006471]
ens|ENSGALT00000001241|gb|CR386825|gb|BX950313|gb|BX930112	TMCO6	1.1235	7.01796e-05	transmembrane and coiled-coil domains 6 [Source:HGNC Symbol;Acc:28814] [ENSGALT00000001241]	ens|ENSGALT00000030112|ref|XM_417095	RFXAP	1.48287	0.000921379	regulatory factor X-associated protein [Source:HGNC Symbol;Acc:9988] [ENSGALT00000030112]
ens|ENSGALT00000026138|gb|CN222982	ENSGALT00000026138	1.80271	7.19542e-05	Uncharacterized protein [Source:UniProtKB/TrEMBL;Acc:F1NDE2] [ENSGALT00000026138]	ens|ENSGALT00000018061|gb|XM_419574|tc|TC378237	C3H1orf96	1.76056	0.000968665	chromosome 1 open reading frame 96 [Source:HGNC Symbol;Acc:29578] [ENSGALT00000018061]
tc|NP9666380	NP9666380	2.4202	8.66307e-05	GB	gb|BX930900	DCAF6	2.34313	0.000998147	Gallus gallus finished cDNA, clone ChEST379b15. [BX930900]
	CN224410	2.1118	9.88441e-05	Target: CN224410; Description: CN224410 RJA101B03.ab1 RJbrain Gallus gallus cDNA 5', mRNA sequence; Next best Hit: CN217176(alignment length 16bp with 100.00%identity)	gb|CR389927|tc|TC416956|ref|XM_003642745	CR389927	1.85191	0.00111363	Gallus gallus finished cDNA, clone ChEST1005l21. [CR389927]
	CN234799	1.84181	9.9685e-05	Target: CN234799; Description: CN234799 WLA104A06.ab1 WLbrain Gallus gallus cDNA 5', mRNA sequence; Next best Hit: A_87_P122613(alignment length 60bp with 98.33%identity)		CN224295	1.769	0.00133581	Target: CN224295; Description: CN224295 RJA100A08.ab1 RJbrain Gallus gallus cDNA 5', mRNA sequence; Next best Hit: CN222537(alignment length 14bp with 100.00%identity)
gb|U31988|tc|NP346439	U31988	6.17634	0.000106751	Gallus gallus tissue-type plasminogen activator (TPA) mRNA, partial cds. [U31988]		CN222903	1.13911	0.00141071	Target: CN222903; Description: CN222903 RJA089H08.ab1 RJbrain Gallus gallus cDNA 5', mRNA sequence; Next best Hit: CN220135(alignment length 20bp with 95.00%identity)
	CO760730	2.49928	0.000114264	Target: CO760730; Description: CO760730 brain_EST03922 Brain cDNA Library Gallus gallus cDNA 5', mRNA sequence; Next best Hit: AW198404(alignment length 16bp with 100.00%identity)	ref|NM_001031477|ens|ENSGALT00000040251|gb|AJ851534|tc|TC394275	YWHAG	1.24464	0.0014345	Gallus gallus tyrosine 3-monooxygenase/tryptophan 5-monooxygenase activation protein, gamma polypeptide (YWHAG), mRNA [NM_001031477]
gb|BX935533|tc|TC417805	BX935533	2.19441	0.000123764	Gallus gallus finished cDNA, clone ChEST536m12. [BX935533]	ref|NM_001252141|ens|ENSGALT00000021648|ens|ENSGALT00000039870|gb|JF803302	SRF	1.22017	0.00147569	Gallus gallus serum response factor (c-fos serum response element-binding transcription factor) (SRF), mRNA [NM_001252141]
gb|CR407039	CR407039	1.29419	0.000139936	Gallus gallus finished cDNA, clone ChEST1013f14. [CR407039]	gb|BX929614	BX929614	5.19968	0.0014987	Gallus gallus finished cDNA, clone ChEST748a13. [BX929614]
gb|XM_419951	ATP6V1C2	2.0415	0.00014427	PREDICTED: Gallus gallus similar to V-ATPase C2 subunit (LOC421939), mRNA [XM_419951]	gb|XM_415535|tc|TC379931	NELF	2.54264	0.0015457	PREDICTED: Gallus gallus hypothetical LOC417260 (LOC417260), mRNA [XM_415535]
gb|CR389698	CR389698	1.54987	0.000148447	Gallus gallus finished cDNA, clone ChEST497n7. [CR389698]	ens|ENSGALT00000035962|tc|TC428165	ENSGALT00000035962	3.48713	0.00162256	Unknown
	CN220881	3.20184	0.000167223	Target: CN220881; Description: CN220881 WLA025C10.ab1 WLbrain Gallus gallus cDNA 5', mRNA sequence; Next best Hit: CN222615(alignment length 15bp with 100.00%identity)	ens|ENSGALT00000005141|tc|TC441507	DNAJA4	3.09389	0.00168766	Uncharacterized protein [Source:UniProtKB/TrEMBL;Acc:F1NLH8] [ENSGALT00000005141]
ens|ENSGALT00000025715|gb|XM_420868|tc|TC414250|tc|TC384410	EIF2AK3	1.37992	0.000168658	Uncharacterized protein [Source:UniProtKB/TrEMBL;Acc:E1BX69] [ENSGALT00000025715]	gb|BX932056|tc|TC389645|ref|XM_422746	LOC424939	1.01125	0.00169348	Gallus gallus finished cDNA, clone ChEST409n24. [BX932056]
ref|NM_001011689|ens|ENSGALT00000004893|ens|ENSGALT00000040383|ens|ENSGALT00000040385	CBFA2T2	1.65945	0.000172794	Gallus gallus core-binding factor, runt domain, alpha subunit 2; translocated to, 2 (CBFA2T2), mRNA [NM_001011689]		CN222066	1.49125	0.00169748	Target: CN222066; Description: CN222066 WLA037C12.ab1 WLbrain Gallus gallus cDNA 5', mRNA sequence; Next best Hit: CN223362(alignment length 60bp with 100.00%identity)
	CN223026	2.38657	0.000175047	Target: CN223026; Description: CN223026 WLA045D06.ab1 WLbrain Gallus gallus cDNA 5', mRNA sequence; Next best Hit: CN218612(alignment length 14bp with 100.00%identity)	gb|CR388810|gb|XM_417781|tc|TC378562	KIAA0319L	1.31625	0.00178325	Gallus gallus finished cDNA, clone ChEST689k23. [CR388810]
ens|ENSGALT00000019442|tc|TC380750|ref|XM_416222	SREBF2	1.36094	0.00018971	sterol regulatory element binding transcription factor 2 [Source:HGNC Symbol;Acc:11290] [ENSGALT00000019442]	ens|ENSGALT00000036608	ENSGALT00000036608	1.67823	0.00178558	Uncharacterized protein [Source:UniProtKB/TrEMBL;Acc:F1NBW4] [ENSGALT00000036608]
gb|DR415335|tc|TC383873|ref|XM_421656	DR415335	1.61289	0.000190607	gPGC_EST05177 Embryonic gonadal PGC cDNA Library Gallus gallus cDNA 5', mRNA sequence [DR415335]	ens|ENSGALT00000003726|gb|CR391439|gb|XM_415419|tc|TC384694	SEC16A	3.86467	0.0018183	SEC16 homolog A (S. cerevisiae) [Source:HGNC Symbol;Acc:29006] [ENSGALT00000003726]
ens|ENSGALT00000009626|gb|BX950818|gb|XM_420992	TUB	2.41487	0.000201405	tubby homolog (mouse) [Source:HGNC Symbol;Acc:12406] [ENSGALT00000009626]	ens|ENSGALT00000040134|tc|TC442817	SEC31B	1.79153	0.00198404	SEC31 homolog B (S. cerevisiae) [Source:HGNC Symbol;Acc:23197] [ENSGALT00000040134]
gb|XM_421099|tc|TC390434	PRDM11	1.37395	0.000202426	PREDICTED: Gallus gallus PR domain containing 11 (PRDM11), mRNA [XM_421099]		CN217584	2.01002	0.00201879	Target: CN217584; Description: CN217584 RJA015A10.ab1 RJbrain Gallus gallus cDNA 5', mRNA sequence; Next best Hit: CN217583(alignment length 61bp with 98.36%identity)
ens|ENSGALT00000000378	IGFN1	1.70609	0.000204545	immunoglobulin-like and fibronectin type III domain containing 1 [Source:HGNC Symbol;Acc:24607] [ENSGALT00000000378]		CN225489	1.45612	0.00230291	Target: CN225489; Description: CN225489 WLA072H06.ab1 WLbrain Gallus gallus cDNA 5', mRNA sequence; Next best Hit: A_87_P053351(alignment length 15bp with 100.00%identity)
	CN233161	2.4751	0.00020634	Target: CN233161; Description: CN233161 RJA103A07.ab1 RJbrain Gallus gallus cDNA 5', mRNA sequence; Next best Hit: A_87_P008788(alignment length 14bp with 100.00%identity)	gb|BX930675|gb|BX932755	BX930675	1.22546	0.00240794	Gallus gallus finished cDNA, clone ChEST374h11. [BX930675]
gb|CR524258	CR524258	1.54663	0.000213586	Gallus gallus finished cDNA, clone ChEST910e20. [CR524258]	ref|NM_001039294|ens|ENSGALT00000026894|gb|AJ719973|tc|TC437167	FDFT1	1.23198	0.00245133	Gallus gallus farnesyl-diphosphate farnesyltransferase 1 (FDFT1), mRNA [NM_001039294]
gb|XM_001235407|tc|TC383598	XM_001235407	3.20798	0.000214855	PREDICTED: Gallus gallus similar to gag [XM_001235407]	ens|ENSGALT00000030545|gb|CR387516|gb|CR523428|tc|TC428385	ENSGALT00000030545	1.23419	0.00245284	Uncharacterized protein [Source:UniProtKB/TrEMBL;Acc:F1NML8] [ENSGALT00000030545]
ens|ENSGALT00000013991|gb|BU297988|tc|TC421943|tc|TC440534	LOC771098	1.89798	0.0002167	603741822F1 CSEQCHN56 Gallus gallus cDNA clone ChEST640l6 5', mRNA sequence [BU297988]	ens|ENSGALT00000003500|gb|CR407252|tc|TC416047	ATP6V0D1	1.22895	0.00251832	ATPase, H+ transporting, lysosomal 38kDa, V0 subunit d1 [Source:HGNC Symbol;Acc:13724] [ENSGALT00000003500]
gb|CR406811|gb|CR391375|tc|TC418271|tc|TC390999	CR406811	1.4879	0.000217453	Gallus gallus finished cDNA, clone ChEST560i12. [CR406811]	ens|ENSGALT00000007656|gb|CR353253|tc|TC434120|tc|TC378731	MPRIP	1.05789	0.00252806	myosin phosphatase Rho interacting protein [Source:HGNC Symbol;Acc:30321] [ENSGALT00000007656]
gb|BX933822|gb|BX931274|ref|XM_001231468	BX933822	1.38808	0.000221775	Gallus gallus finished cDNA, clone ChEST4e8. [BX933822]		GT_EA606_A_87_P215863	2.70277	0.00257426	Unknown
ens|ENSGALT00000016116|ref|XM_430042	LOC423306	1.51469	0.000222929	Uncharacterized protein [Source:UniProtKB/TrEMBL;Acc:E1C1D0] [ENSGALT00000016116]	ens|ENSGALT00000019606|gb|BU324420|tc|TC378490|ref|XM_420638	NDST4	1.01831	0.00259099	N-deacetylase/N-sulfotransferase (heparan glucosaminyl) 4 [Source:HGNC Symbol;Acc:20779] [ENSGALT00000019606]
ref|NM_204417|ens|ENSGALT00000040265|ens|ENSGALT00000003428|ens|ENSGALT00000040267	PTPRC	2.65316	0.00022702	Gallus gallus protein tyrosine phosphatase, receptor type, C (PTPRC), mRNA [NM_204417]	ens|ENSGALT00000007656|gb|CR523904|tc|TC440275|tc|TC378731	MPRIP	1.06382	0.00262668	myosin phosphatase Rho interacting protein [Source:HGNC Symbol;Acc:30321] [ENSGALT00000007656]
gb|CR390260|gb|BU295029	CR390260	1.59822	0.000227236	Gallus gallus finished cDNA, clone ChEST231d14. [CR390260]	tc|NP9666031	NP9666031	1.63448	0.00263182	GB
gb|CR391488	CR391488	1.82461	0.000241515	Gallus gallus finished cDNA, clone ChEST901b24. [CR391488]		CN219064	1.5346	0.002705	Target: CN219064; Description: CN219064 RJA048E11.ab1 RJbrain Gallus gallus cDNA 5', mRNA sequence; Next best Hit: CN219956(alignment length 14bp with 100.00%identity)
ens|ENSGALT00000025195|gb|XM_420820|tc|TC380837|tc|TC414216	RGS12	1.75128	0.000241618	regulator of G-protein signaling 12 [Source:HGNC Symbol;Acc:9994] [ENSGALT00000025195]	tc|TC382384	TC382384	2.2809	0.00281495	Rep: NudC domain-containing protein 2 - Rattus norvegicus (Rat), complete [TC382384]
ref|NM_001040642|ens|ENSGALT00000019217|gb|BU127622|tc|TC398866	LOC417954	1.42825	0.000244849	Gallus gallus histone H1.01 (LOC417954), mRNA [NM_001040642]	ens|ENSGALT00000007518|tc|TC440865|ref|XM_425235	KCNJ12	1.08435	0.00285596	Uncharacterized protein [Source:UniProtKB/TrEMBL;Acc:F1NHE9] [ENSGALT00000007518]
gb|BX930394|gb|BX932618|tc|TC394040|ref|XM_414299	NOL8	4.58133	0.000247213	Gallus gallus finished cDNA, clone ChEST633e24. [BX930394]	ens|ENSGALT00000011260|gb|CR523059|gb|XM_413879|tc|TC379989	ENSGALT00000011260	1.29164	0.00308334	chromodomain helicase DNA binding protein 2 [Source:HGNC Symbol;Acc:1917] [ENSGALT00000011260]
	CO761668	1.6485	0.000266133	Target: CO761668; Description: CO761668 brain_EST04860 Brain cDNA Library Gallus gallus cDNA 5', mRNA sequence; Next best Hit: CO763660(alignment length 61bp with 98.36%identity)	ref|NM_001031124|ens|ENSGALT00000012638|gb|AJ720786|tc|TC376719	UPRT	1.387	0.00309564	Gallus gallus uracil phosphoribosyltransferase (FUR1) homolog (S. cerevisiae) (UPRT), mRNA [NM_001031124]
gb|CR406702	CR406702	2.28726	0.000267533	Gallus gallus finished cDNA, clone ChEST762o18. [CR406702]	gb|CR523109	CR523109	1.58725	0.00311063	Gallus gallus finished cDNA, clone ChEST238d19. [CR523109]
	CO763681	1.87968	0.000271146	Target: CO763681; Description: CO763681 brain_EST06873 Brain cDNA Library Gallus gallus cDNA 5', mRNA sequence; Next best Hit: CO763693(alignment length 50bp with 92.00%identity)	ens|ENSGALT00000040817|ens|ENSGALT00000002371|ref|XM_003642550	ENSGALT00000040817	3.6171	0.00329451	potassium channel, subfamily U, member 1 [Source:HGNC Symbol;Acc:18867] [ENSGALT00000040817]
ref|NM_204787|gb|X60226|gb|D13542|tc|TC414706	VCAN	1.05454	0.000276016	Gallus gallus versican (VCAN), mRNA [NM_204787]	gb|CR354059|tc|TC424100|ref|XM_430385	CR354059	1.78382	0.00335333	Gallus gallus finished cDNA, clone ChEST375a12. [CR354059]
ens|ENSGALT00000013244|gb|CR387487|tc|TC387599|ref|XM_414982	IL15RA	1.83201	0.000285321	Uncharacterized protein [Source:UniProtKB/TrEMBL;Acc:E1C7S7] [ENSGALT00000013244]	ens|ENSGALT00000037881|gb|AJ720375|gb|AJ738667|tc|TC373593	CEP170	1.05458	0.00339033	centrosomal protein 170kDa [Source:HGNC Symbol;Acc:28920] [ENSGALT00000037881]
gb|CR386993	NBEAL2	1.43464	0.000302876	Gallus gallus finished cDNA, clone ChEST816j19. [CR386993]	ens|ENSGALT00000027844|gb|EF197909|gb|U30609|gb|XM_417201	MTNR1B	3.18641	0.00340143	Melatonin receptor type 1B [Source:UniProtKB/Swiss-Prot;Acc:P51050] [ENSGALT00000027844]
ens|ENSGALT00000023436	ENSGALT00000023436	1.97315	0.000305384	Uncharacterized protein [Source:UniProtKB/TrEMBL;Acc:F1NG77] [ENSGALT00000023436]	ref|NM_204523|ens|ENSGALT00000039292|ens|ENSGALT00000004022|gb|CR389975	TLN1	1.15499	0.00341847	Gallus gallus talin 1 (TLN1), mRNA [NM_204523]
gb|BX934912|tc|TC383017	TRIM65	2.17371	0.000308016	Gallus gallus finished cDNA, clone ChEST152b11. [BX934912]		CN217393	1.87158	0.00345963	Target: CN217393; Description: CN217393 RJA010F09.ab1 RJbrain Gallus gallus cDNA 5', mRNA sequence; Next best Hit: CN235857(alignment length 60bp with 100.00%identity)
ens|ENSGALT00000006457|gb|CR354364|gb|BX931156|gb|BX931638	LRRC49	1.98165	0.00031947	leucine rich repeat containing 49 [Source:HGNC Symbol;Acc:25965] [ENSGALT00000006457]	ref|NM_204476|ens|ENSGALT00000031766|gb|BX934998|gb|BX935782	SGK1	2.93282	0.00346243	Gallus gallus serum/glucocorticoid regulated kinase 1 (SGK1), mRNA [NM_204476]
gb|XM_416224|tc|TC397986	MEI1	1.08998	0.000339179	PREDICTED: Gallus gallus similar to meiosis defective 1 (LOC417985), mRNA [XM_416224]	ens|ENSGALT00000001368|gb|CR387663|tc|TC430125|ref|XM_415711	ENSGALT00000001368	1.23094	0.00354698	Uncharacterized protein [Source:UniProtKB/TrEMBL;Acc:F1NE56] [ENSGALT00000001368]
ens|ENSGALT00000027658|gb|CR386505	SACS	1.55199	0.000349892	spastic ataxia of Charlevoix-Saguenay (sacsin) [Source:HGNC Symbol;Acc:10519] [ENSGALT00000027658]	ref|NM_001199473|ens|ENSGALT00000025417|gb|BX932726|gb|CR353353	MRPL53	1.2627	0.00357511	Gallus gallus mitochondrial ribosomal protein L53 (MRPL53), nuclear gene encoding mitochondrial protein, mRNA [NM_001199473]
tc|NP9679179	NP9679179	1.68852	0.000359878	GB		CN225566	1.57665	0.00365748	Target: CN225566; Description: CN225566 WLA074B01.ab1 WLbrain Gallus gallus cDNA 5', mRNA sequence; Next best Hit: A_87_P191073(alignment length 33bp with 96.97%identity)
	CO759080	1.76875	0.000362517	Target: CO759080; Description: CO759080 brain_EST02272 Brain cDNA Library Gallus gallus cDNA 5', mRNA sequence; Next best Hit: CO759110(alignment length 60bp with 98.33%identity)	ref|NM_001159754|ens|ENSGALT00000021808|gb|BX935206|tc|TC415378	TBL1X	1.10155	0.00371481	Gallus gallus transducin (beta)-like 1X-linked (TBL1X), mRNA [NM_001159754]
tc|NP9676035|tc|NP9676024|tc|NP9666465|tc|TC377158	NP9676035	1.76313	0.000370136	GB	gb|CR385659|tc|TC394861	CR385659	1.78167	0.00372664	Gallus gallus finished cDNA, clone ChEST852b13. [CR385659]
ens|ENSGALT00000013959|ens|ENSGALT00000039193|gb|XR_027177|ref|XM_003640345	ENSGALT00000013959	1.32464	0.000379122	Mov10l1, Moloney leukemia virus 10-like 1, homolog (mouse) [Source:HGNC Symbol;Acc:7201] [ENSGALT00000013959]		CN225535	1.70516	0.00385411	Target: CN225535; Description: CN225535 WLA073F06.ab1 WLbrain Gallus gallus cDNA 5', mRNA sequence; Next best Hit: CN223207(alignment length 16bp with 100.00%identity)
ref|NM_001039913|ens|ENSGALT00000037114|ens|ENSGALT00000022852|ens|ENSGALT00000029692	MRPS26	2.72683	0.000383145	Gallus gallus mitochondrial ribosomal protein S26 (MRPS26), nuclear gene encoding mitochondrial protein, mRNA [NM_001039913]		CN225427	1.68041	0.00392743	Target: CN225427; Description: CN225427 WLA072A03.ab1 WLbrain Gallus gallus cDNA 5', mRNA sequence; Next best Hit: CN220586(alignment length 56bp with 96.43%identity)
gb|XM_001232084|tc|NP9669457|tc|NP9676059|tc|TC421992	XM_001232084	1.73944	0.000422898	PREDICTED: Gallus gallus hypothetical protein LOC768924 (LOC768924), partial mRNA [XM_001232084]	ens|ENSGALT00000021309|ens|ENSGALT00000037480|tc|TC377614|ref|XM_416397	TUBA4A	1.50805	0.00401481	Uncharacterized protein [Source:UniProtKB/TrEMBL;Acc:F1NJN1] [ENSGALT00000021309]
tc|NP9665234	NP9665234	1.88922	0.000450417	GB	ens|ENSGALT00000007199|gb|CR385424	ENSGALT00000007199	1.58593	0.00402105	mitofusin 2 [Source:HGNC Symbol;Acc:16877] [ENSGALT00000007199]
gb|CR406919	CR406919	1.11369	0.000456146	Gallus gallus finished cDNA, clone ChEST936o5. [CR406919]	gb|CR387030|tc|TC389709|ref|XM_429884	LOC421805	2.6935	0.00406211	Gallus gallus finished cDNA, clone ChEST438i11. [CR387030]
	AW198534	5.47698	0.000466018	Target: AW198534; Description: AW198534 pnl1s.pk002.c3 chicken liver cDNA library Gallus gallus cDNA clone pnl1s.pk002.c3 ; Next best Hit: CN216861(alignment length 36bp with 97.22%identity)	ref|NM_001244882|ens|ENSGALT00000009113|gb|BX932954|gb|XM_422329	ARHGAP29	1.77466	0.00415349	Gallus gallus Rho GTPase activating protein 29 (ARHGAP29), mRNA [NM_001244882]
gb|CR406695	EML6	1.97888	0.000471346	Gallus gallus finished cDNA, clone ChEST290o17. [CR406695]	tc|NP9674010	NP9674010	1.83444	0.00435107	GB
	CO759350	1.9858	0.000471353	Target: CO759350; Description: CO759350 brain_EST02542 Brain cDNA Library Gallus gallus cDNA 5', mRNA sequence; Next best Hit: CO762468(alignment length 60bp with 100.00%identity)	ref|NM_206957|ens|ENSGALT00000029962|ens|ENSGALT00000003190|gb|AB013751	DNASE1	3.68676	0.0044171	Gallus gallus deoxyribonuclease I (DNASE1), mRNA [NM_206957]
tc|NP9669457|tc|NP9676059	NP9669457	4.95066	0.000479539	GB	ens|ENSGALT00000033178|gb|BX934986|gb|XM_415049|tc|TC386624	C14H8orf33	1.26599	0.0045425	chromosome 8 open reading frame 33 [Source:HGNC Symbol;Acc:26104] [ENSGALT00000033178]
ens|ENSGALT00000026017|gb|CR388626|tc|TC381399|ref|XM_416740	ENSGALT00000026017	2.17589	0.000481592	PR domain containing 15 [Source:HGNC Symbol;Acc:13999] [ENSGALT00000026017]	tc|NP9668862	NP9668862	1.75377	0.00458646	GB
	CO761447	2.38804	0.000485704	Target: CO761447; Description: CO761447 brain_EST04639 Brain cDNA Library Gallus gallus cDNA 5', mRNA sequence; Next best Hit: CO759028(alignment length 60bp with 98.33%identity)		CN218542	1.68293	0.00467838	Target: CN218542; Description: CN218542 RJA032A05.ab1 RJbrain Gallus gallus cDNA 5', mRNA sequence; Next best Hit: CN221684(alignment length 60bp with 100.00%identity)
ens|ENSGALT00000010578|ens|ENSGALT00000039285|gb|AB101639|tc|TC418471	ENSGALT00000010578	1.25863	0.000489734	tetraspanin 32 [Source:HGNC Symbol;Acc:13410] [ENSGALT00000010578]	gb|CR407248|tc|TC397185|tc|TC443403	CR407248	1.7631	0.00468811	Gallus gallus finished cDNA, clone ChEST821a11. [CR407248]
	CO759018	1.60719	0.000507362	Target: CO759018; Description: CO759018 brain_EST02210 Brain cDNA Library Gallus gallus cDNA 5', mRNA sequence; Next best Hit: CO759025(alignment length 60bp with 100.00%identity)		CN217898	1.93055	0.00473421	Target: CN217898; Description: CN217898 RJA020G08.ab1 RJbrain Gallus gallus cDNA 5', mRNA sequence; Next best Hit: CN225032(alignment length 60bp with 100.00%identity)
ref|NM_001177532|ens|ENSGALT00000004709|gb|CR387126|tc|TC425455	SPHKAP	1.95969	0.000513559	Gallus gallus SPHK1 interactor, AKAP domain containing (SPHKAP), mRNA [NM_001177532]		GT_EA606_A_87_P025439	1.77632	0.0047697	Unknown
	CN224856	1.59772	0.000519617	Target: CN224856; Description: CN224856 WLA063B05.ab1 WLbrain Gallus gallus cDNA 5', mRNA sequence; Next best Hit: CN225146(alignment length 16bp with 100.00%identity)	ens|ENSGALT00000036201|tc|TC416899	ENSGALT00000036201	1.3645	0.00488231	Unknown
ref|NM_205332|ens|ENSGALT00000002811|ens|ENSGALT00000034618|gb|Z22605	CTCF	1.53337	0.000527299	Gallus gallus CCCTC-binding factor (zinc finger protein) (CTCF), mRNA [NM_205332]	ref|NM_204969|ens|ENSGALT00000026970|ens|ENSGALT00000031524|gb|U34278	PLA2G7	1.71498	0.00501909	Gallus gallus phospholipase A2, group VII (platelet-activating factor acetylhydrolase, plasma) (PLA2G7), mRNA [NM_204969]
ref|NM_204419|ens|ENSGALT00000036483|ens|ENSGALT00000027459|ens|ENSGALT00000036486	RB1	3.24923	0.000552743	Gallus gallus retinoblastoma 1 (RB1), mRNA [NM_204419]		CN236280	1.26574	0.005096	Target: CN236280; Description: CN236280 WLA110E04.ab1 WLbrain Gallus gallus cDNA 5', mRNA sequence; Next best Hit: CO763591(alignment length 15bp with 100.00%identity)
ens|ENSGALT00000018221|gb|CR524170|gb|XM_416130|tc|TC383421	CEP290	2.01773	0.000563366	centrosomal protein 290kDa [Source:HGNC Symbol;Acc:29021] [ENSGALT00000018221]	gb|BX934003|tc|TC436005|tc|TC388979	NCBP2	2.04094	0.00514793	Gallus gallus finished cDNA, clone ChEST27m2. [BX934003]
gb|BX932868	BX932868	1.67155	0.000570989	Gallus gallus finished cDNA, clone ChEST716m2. [BX932868]		CN221853	1.4034	0.00535193	Target: CN221853; Description: CN221853 WLA035D11.ab1 WLbrain Gallus gallus cDNA 5', mRNA sequence; Next best Hit: CN218956(alignment length 60bp with 95.00%identity)
ens|ENSGALT00000013975|gb|CR389836|gb|CO771512|tc|TC392162	ADAM23	1.54177	0.000585476	ADAM metallopeptidase domain 23 [Source:HGNC Symbol;Acc:202] [ENSGALT00000013975]		CN225515	1.08657	0.00574377	Target: CN225515; Description: CN225515 WLA073C10.ab1 WLbrain Gallus gallus cDNA 5', mRNA sequence; Next best Hit: CO763391(alignment length 60bp with 100.00%identity)
	CO760295	1.57655	0.00059948	Target: CO760295; Description: CO760295 brain_EST03487 Brain cDNA Library Gallus gallus cDNA 5', mRNA sequence; Next best Hit: CN224979(alignment length 15bp with 100.00%identity)	ens|ENSGALT00000015924|gb|BX950800|gb|BU217173|tc|TC382080	SMYD2	2.02796	0.00585353	N-lysine methyltransferase SMYD2 [Source:UniProtKB/Swiss-Prot;Acc:E1C5V0] [ENSGALT00000015924]
ens|ENSGALT00000003085|gb|XM_001232752|tc|TC389116	PARP6	2.00756	0.000601365	poly (ADP-ribose) polymerase family, member 6 [Source:HGNC Symbol;Acc:26921] [ENSGALT00000003085]		CN234970	2.32834	0.0058668	Target: CN234970; Description: CN234970 WLA104F08.ab1 WLbrain Gallus gallus cDNA 5', mRNA sequence; Next best Hit: CN220119(alignment length 13bp with 100.00%identity)
tc|NP9680344	NP9680344	2.18094	0.000602843	GB		CN219229	3.07007	0.00587744	Target: CN219229; Description: CN219229 WLA002H02.ab1 WLbrain Gallus gallus cDNA 5', mRNA sequence; Next best Hit: A_87_P101601(alignment length 14bp with 100.00%identity)
gb|CR406023|tc|TC384269	CR406023	1.37588	0.000618345	Gallus gallus finished cDNA, clone ChEST640c9. [CR406023]	gb|XM_417932	PIH1D2	2.14508	0.00590515	PREDICTED: Gallus gallus hypothetical LOC419795 (LOC419795), mRNA [XM_417932]
ens|ENSGALT00000041368	ENSGALT00000041368	3.0764	0.000620489	Uncharacterized protein [Source:UniProtKB/TrEMBL;Acc:F1NQX5] [ENSGALT00000041368]	ref|NM_001006554|ens|ENSGALT00000015429|gb|CR387835|gb|AJ720679	PDCD10	1.08506	0.00605462	Gallus gallus programmed cell death 10 (PDCD10), mRNA [NM_001006554]
gb|BU468187	BU468187	2.06946	0.000628474	603373384F1 CSEQRBN20 Gallus gallus cDNA clone ChEST283h22 5', mRNA sequence [BU468187]	ens|ENSGALT00000015796	ENSGALT00000015796	1.25571	0.00608102	Uncharacterized protein [Source:UniProtKB/TrEMBL;Acc:F1N854] [ENSGALT00000015796]
gb|EU240259	EU240259	2.20711	0.00063361	Gallus gallus clone 353 GGN43 snoRNA, complete sequence. [EU240259]	ens|ENSGALT00000013227|gb|CR386759|gb|XM_413937|tc|TC384252	UACA	1.86349	0.00612524	uveal autoantigen with coiled-coil domains and ankyrin repeats [Source:HGNC Symbol;Acc:15947] [ENSGALT00000013227]
tc|NP9671041	NP9671041	1.98272	0.000652619	GB	ens|ENSGALT00000007577|gb|CR389465|tc|TC380451|ref|XM_418501	ENSGALT00000007577	1.89411	0.00621432	obscurin, cytoskeletal calmodulin and titin-interacting RhoGEF [Source:HGNC Symbol;Acc:15719] [ENSGALT00000007577]
	A_87_P262855	1.8369	0.00065357	; Next best Hit: CO759114(alignment length 60bp with 100.00%identity)		CN233227	2.02285	0.00634859	Target: CN233227; Description: CN233227 RJA108A09.ab1 RJbrain Gallus gallus cDNA 5', mRNA sequence; Next best Hit: A_87_P030436(alignment length 15bp with 100.00%identity)
ref|NM_001199414|ens|ENSGALT00000019632|tc|TC425320	QSER1	1.62419	0.00065742	Gallus gallus glutamine and serine rich 1 (QSER1), mRNA [NM_001199414]	gb|CR386202	CR386202	1.24409	0.00641704	Gallus gallus finished cDNA, clone ChEST252h18. [CR386202]
ens|ENSGALT00000015996|gb|XM_422008|tc|TC391331|tc|TC380660	PPIG	1.59217	0.000663367	peptidylprolyl isomerase G (cyclophilin G) [Source:HGNC Symbol;Acc:14650] [ENSGALT00000015996]	ref|NM_204234|ens|ENSGALT00000005124|gb|AF364328|tc|TC376745	GNA11	1.31193	0.00648595	Gallus gallus guanine nucleotide binding protein (G protein), alpha 11 (Gq class) (GNA11), mRNA [NM_204234]
tc|NP9679748	NP9679748	5.34544	0.000666836	GB		CN226016	2.88781	0.00649297	Target: CN226016; Description: CN226016 WLA082G09.ab1 WLbrain Gallus gallus cDNA 5', mRNA sequence; Next best Hit: A_87_P310787(alignment length 14bp with 100.00%identity)
ens|ENSGALT00000014195|gb|CR386732|tc|TC443768|tc|TC382453	KIF16B	2.54906	0.000667124	Uncharacterized protein [Source:UniProtKB/TrEMBL;Acc:F1NUI7] [ENSGALT00000014195]	ens|ENSGALT00000034662|gb|CR387118|gb|XM_415667|tc|TC379125	TEX2	1.4989	0.00661144	testis expressed 2 [Source:HGNC Symbol;Acc:30884] [ENSGALT00000034662]
ens|ENSGALT00000040734|tc|TC428197	ENSGALT00000040734	4.37386	0.000673319	Uncharacterized protein [Source:UniProtKB/TrEMBL;Acc:E1C558] [ENSGALT00000040734]		CN224100	3.3533	0.00661317	Target: CN224100; Description: CN224100 WLA053D05.ab1 WLbrain Gallus gallus cDNA 5', mRNA sequence; Next best Hit: A_87_P286938(alignment length 15bp with 100.00%identity)
	CO760219	2.59078	0.000681671	Target: CO760219; Description: CO760219 brain_EST03411 Brain cDNA Library Gallus gallus cDNA 5', mRNA sequence; Next best Hit: CO759294(alignment length 37bp with 89.19%identity)	tc|TC441265	TC441265	1.46477	0.00662156	Rep: Lysosomal-associated transmembrane protein 4B - Macaca fascicularis (Crab eating macaque) (Cynomolgus monkey), partial (69%) [TC441265]
ens|ENSGALT00000003450|gb|CR385504|gb|CR390068|gb|XM_424658	SLC7A4	1.13792	0.000690433	Uncharacterized protein [Source:UniProtKB/TrEMBL;Acc:E1BVL6] [ENSGALT00000003450]	ens|ENSGALT00000040696|ens|ENSGALT00000040695|tc|TC418723|tc|TC438358	ENSGALT00000040696	1.66403	0.00668003	tropomyosin 3 [Source:HGNC Symbol;Acc:12012] [ENSGALT00000040696]
ens|ENSGALT00000022823|gb|CR385971|gb|CR390206|tc|TC433597	ENSGALT00000022823	4.87266	0.000697991	Uncharacterized protein [Source:UniProtKB/TrEMBL;Acc:F1P1A2] [ENSGALT00000022823]	ref|NM_204476|ens|ENSGALT00000031766|gb|BX934998|gb|BX935782	SGK1	4.2007	0.00674817	Gallus gallus serum/glucocorticoid regulated kinase 1 (SGK1), mRNA [NM_204476]
	CO759706	2.536	0.000698558	Target: CO759706; Description: CO759706 brain_EST02898 Brain cDNA Library Gallus gallus cDNA 5', mRNA sequence; Next best Hit: A_87_P101781(alignment length 14bp with 100.00%identity)	gb|BX933866	TECRL	4.39349	0.00675059	Gallus gallus finished cDNA, clone ChEST913g19. [BX933866]
ens|ENSGALT00000008490|gb|BX933769|ref|XM_003641314	ENSGALT00000008490	1.932	0.000711521	PTPRF interacting protein, binding protein 2 (liprin beta 2) [Source:HGNC Symbol;Acc:9250] [ENSGALT00000008490]	tc|NP9666011	NP9666011	1.1867	0.00679801	GB
ref|NM_001038496|ens|ENSGALT00000036588|ens|ENSGALT00000027066|gb|AF144637	EIF5B	1.03626	0.000711828	Gallus gallus eukaryotic translation initiation factor 5B (EIF5B), mRNA [NM_001038496]	gb|CR523353|tc|TC383245|tc|TC432636	SEMA6D	2.17464	0.00686326	Gallus gallus finished cDNA, clone ChEST579e9. [CR523353]
ens|ENSGALT00000021306|gb|BX932201|gb|BU329144|tc|TC387988	ENSGALT00000021306	1.24825	0.000714012	5-methyltetrahydrofolate-homocysteine methyltransferase reductase [Source:HGNC Symbol;Acc:7473] [ENSGALT00000021306]	ref|NM_205531|ens|ENSGALT00000009817|gb|AB193181|gb|U02097	WNT8A	1.53239	0.00698464	Gallus gallus wingless-type MMTV integration site family, member 8A (WNT8A), mRNA [NM_205531]
ens|ENSGALT00000019676|gb|BX932170|gb|BX936121|gb|BX936103	ARPP21	2.28546	0.000723091	cAMP-regulated phosphoprotein, 21kDa [Source:HGNC Symbol;Acc:16968] [ENSGALT00000019676]	ref|NM_001029849|ens|ENSGALT00000002385|ens|ENSGALT00000040168|ens|ENSGALT00000040171	RHOC	1.45933	0.00700832	Gallus gallus ras homolog gene family, member C (RHOC), mRNA [NM_001029849]
ens|ENSGALT00000022884|ref|XM_003641209	ENSGALT00000022884	4.40913	0.00072801	Uncharacterized protein [Source:UniProtKB/TrEMBL;Acc:F1NZW6] [ENSGALT00000022884]	gb|CR387187|gb|BX931845|gb|BX930413|gb|CR353776	TMEM141	2.6168	0.00701006	Gallus gallus finished cDNA, clone ChEST782k23. [CR387187]
	CK608252	4.37689	0.000733921	Target: CK608252; Description: CK608252 IFN_C24 Interferon Stimulated Chicken PBL Macrophage Gallus gallus cDNA clone IFN_C24 ; Next best Hit: CK610341(alignment length 60bp with 100.00%identity)	ens|ENSGALT00000031799|gb|XM_419668|tc|TC380006|tc|TC412738	LRP11	2.5474	0.0070352	low density lipoprotein receptor-related protein 11 [Source:HGNC Symbol;Acc:16936] [ENSGALT00000031799]
gb|CR385744	CR385744	2.96136	0.000736657	Gallus gallus finished cDNA, clone ChEST516d24. [CR385744]		CN225736	1.15094	0.00706396	Target: CN225736; Description: CN225736 WLA077D03.ab1 WLbrain Gallus gallus cDNA 5', mRNA sequence; Next best Hit: CO761906(alignment length 24bp with 91.67%identity)
	AW198366	2.86341	0.000786615	Target: AW198366; Description: AW198366 pnl-b.pk0005.h1 chicken liver cDNA library Gallus gallus cDNA clone pnl-b.pk0005.h1 5', mRNA sequence; Next best Hit: CN217233(alignment length 15bp with 100.00%identity)		CN218739	2.04961	0.00709904	Target: CN218739; Description: CN218739 RJA038C01.ab1 RJbrain Gallus gallus cDNA 5', mRNA sequence; Next best Hit: CO760616(alignment length 60bp with 100.00%identity)
gb|L48879	L48879	3.04788	0.000787147	Gallus gallus clone cDNA5AF, repeat region. [L48879]		CN216901	2.88148	0.00712611	Target: CN216901; Description: CN216901 RJA002C05.ab1 RJbrain Gallus gallus cDNA 5', mRNA sequence; Next best Hit: CN219886(alignment length 20bp with 95.00%identity)
	CO762677	2.34035	0.00079126	Target: CO762677; Description: CO762677 brain_EST05869 Brain cDNA Library Gallus gallus cDNA 5', mRNA sequence; Next best Hit: CO759327(alignment length 23bp with 100.00%identity)	ens|ENSGALT00000018061|gb|XM_419574|tc|TC378237	C3H1orf96	1.78371	0.00715059	chromosome 1 open reading frame 96 [Source:HGNC Symbol;Acc:29578] [ENSGALT00000018061]
gb|XM_001232349|tc|TC374414	RB1CC1	1.73235	0.000798854	PREDICTED: Gallus gallus RB1-inducible coiled-coil 1 (RB1CC1), mRNA [XM_001232349]	ens|ENSGALT00000003315|tc|TC428626|ref|XM_003642525	ENSGALT00000003315	1.35128	0.00726212	pleckstrin homology domain containing, family N member 1 [Source:HGNC Symbol;Acc:25284] [ENSGALT00000003315]
ens|ENSGALT00000014863|tc|TC442839	GPCPD1	1.58542	0.000803048	glycerophosphocholine phosphodiesterase GDE1 homolog (S. cerevisiae) [Source:HGNC Symbol;Acc:26957] [ENSGALT00000014863]	gb|CR406828|tc|TC415451	CR406828	3.57131	0.00731896	Gallus gallus finished cDNA, clone ChEST723l16. [CR406828]
ref|NM_001004493|ref|NM_001160322|ref|NM_001160323|ref|NM_001160320	NFASC	2.52505	0.000810467	Gallus gallus neurofascin (NFASC), transcript variant 2, mRNA [NM_001004493]	ens|ENSGALT00000017615|gb|AF184236|tc|TC401265|tc|TC400639	DTX4	1.2129	0.0073613	deltex homolog 4 (Drosophila) [Source:HGNC Symbol;Acc:29151] [ENSGALT00000017615]
	CN218569	1.33976	0.000846474	Target: CN218569; Description: CN218569 RJA032E07.ab1 RJbrain Gallus gallus cDNA 5', mRNA sequence; Next best Hit: CN218688(alignment length 60bp with 100.00%identity)	ens|ENSGALT00000040521|tc|TC399318|ref|XM_003642779	ENSGALT00000040521	3.20379	0.0074307	Uncharacterized protein [Source:UniProtKB/TrEMBL;Acc:E1C8W0] [ENSGALT00000040521]
	CN222175	1.34969	0.000850336	Target: CN222175; Description: CN222175 RJA083A08.ab1 RJbrain Gallus gallus cDNA 5', mRNA sequence; Next best Hit: A_87_P013978(alignment length 16bp with 100.00%identity)	gb|CR407117|tc|TC433966|tc|TC418833	CR407117	2.16064	0.0074579	Gallus gallus finished cDNA, clone ChEST749h24. [CR407117]
	GT_EA606_A_87_P307488	1.63277	0.000863961	Unknown		CN218509	1.60248	0.00747222	Target: CN218509; Description: CN218509 RJA031E03.ab1 RJbrain Gallus gallus cDNA 5', mRNA sequence; Next best Hit: CN223994(alignment length 25bp with 92.00%identity)
ens|ENSGALT00000000355|gb|XM_417676|tc|TC398343	ENSGALT00000000355	1.84038	0.000869941	cell division cycle associated 2 [Source:HGNC Symbol;Acc:14623] [ENSGALT00000000355]	ref|NM_001031477|ens|ENSGALT00000040251|gb|CR353207|gb|AJ851534	YWHAG	1.26559	0.00750531	Gallus gallus tyrosine 3-monooxygenase/tryptophan 5-monooxygenase activation protein, gamma polypeptide (YWHAG), mRNA [NM_001031477]
ens|ENSGALT00000021557|gb|CR524382|gb|BU463334	ANKS6	2.98498	0.000871302	ankyrin repeat and sterile alpha motif domain containing 6 [Source:HGNC Symbol;Acc:26724] [ENSGALT00000021557]	gb|CR385528|tc|TC377440|ref|XM_424024	CR385528	1.67364	0.00750598	Gallus gallus finished cDNA, clone ChEST377k23. [CR385528]
ens|ENSGALT00000009003|ens|ENSGALT00000039706|ref|XM_425708	OGFR	2.64661	0.000895757	opioid growth factor receptor [Source:HGNC Symbol;Acc:15768] [ENSGALT00000009003]	ens|ENSGALT00000011032|tc|TC419484	ENSGALT00000011032	1.17079	0.00753396	ubiquitin specific peptidase 19 [Source:HGNC Symbol;Acc:12617] [ENSGALT00000011032]
	CN217902	1.12308	0.000898523	Target: CN217902; Description: CN217902 RJA020G12.ab1 RJbrain Gallus gallus cDNA 5', mRNA sequence; Next best Hit: CN221427(alignment length 13bp with 100.00%identity)	gb|BX933760|gb|BX933713|gb|BX932525|gb|BX950308	CHCHD5	1.37791	0.00753771	Gallus gallus finished cDNA, clone ChEST912c23. [BX933760]
tc|TC380544|ref|XM_417164	TC380544	1.33493	0.000910946	Rep: Solute carrier protein 35 family f2 - Felis silvestris catus (Cat), partial (85%) [TC380544]	ens|ENSGALT00000036045|tc|NP9667839|tc|NP9667515|tc|NP9667507	ENSGALT00000036045	1.34691	0.00763656	Olfactory receptor OR24 [Source:UniProtKB/TrEMBL;Acc:B4X7L2] [ENSGALT00000036045]
tc|TC439944	TC439944	1.1557	0.000933645	Unknown	ref|NM_001044647|ens|ENSGALT00000016494|gb|BX934112|gb|AB241390	MDGA1	1.08783	0.00764162	Gallus gallus MAM domain containing glycosylphosphatidylinositol anchor 1 (MDGA1), mRNA [NM_001044647]
ens|ENSGALT00000026871|gb|BX932109|ref|XM_420036	PINX1	1.69931	0.000939314	PIN2/TERF1 interacting, telomerase inhibitor 1 [Source:HGNC Symbol;Acc:30046] [ENSGALT00000026871]	gb|CR524105	C5H14orf43	3.67511	0.0077023	Gallus gallus finished cDNA, clone ChEST256k10. [CR524105]
	CO759605	4.46744	0.000941939	Target: CO759605; Description: CO759605 brain_EST02797 Brain cDNA Library Gallus gallus cDNA 5', mRNA sequence; Next best Hit: CO764208(alignment length 35bp with 94.29%identity)		CO759706	3.03047	0.00771384	Target: CO759706; Description: CO759706 brain_EST02898 Brain cDNA Library Gallus gallus cDNA 5', mRNA sequence; Next best Hit: A_87_P101781(alignment length 14bp with 100.00%identity)
gb|CR388532|tc|TC397746	CR388532	1.12251	0.000962568	Gallus gallus finished cDNA, clone ChEST587e18. [CR388532]	ref|NM_001109771|ens|ENSGALT00000035223|ens|ENSGALT00000000498|gb|M28488	RPS6KA1	1.19626	0.00771807	Gallus gallus ribosomal protein S6 kinase, 90kDa, polypeptide 1 (RPS6KA1), mRNA [NM_001109771]
	CO761585	2.13016	0.000970349	Target: CO761585; Description: CO761585 brain_EST04777 Brain cDNA Library Gallus gallus cDNA 5', mRNA sequence; Next best Hit: CO763016(alignment length 50bp with 96.00%identity)	ref|NM_001031186|ens|ENSGALT00000038706|ens|ENSGALT00000012218|gb|AJ720231	ORAOV1	1.56465	0.00773073	Gallus gallus oral cancer overexpressed 1 (ORAOV1), mRNA [NM_001031186]
gb|AJ721038|gb|AJ453064|tc|TC418045	LOC100858203	1.29049	0.000978711	Gallus gallus mRNA for hypothetical protein, clone 33c16. [AJ721038]		CN234100	1.49565	0.00783189	Target: CN234100; Description: CN234100 WLA095C10.ab1 WLbrain Gallus gallus cDNA 5', mRNA sequence; Next best Hit: CN218649(alignment length 62bp with 96.77%identity)
gb|BX950688|ens|ENSGALT00000035661	RSF1	2.86038	0.000979702	Gallus gallus finished cDNA, clone ChEST527i8. [BX950688]	ens|ENSGALT00000004181|gb|BX929921|gb|BX929725|tc|TC436406	UBTD1	1.50745	0.00787527	ubiquitin domain containing 1 [Source:HGNC Symbol;Acc:25683] [ENSGALT00000004181]
ens|ENSGALT00000038009	ENSGALT00000038009	3.04369	0.000982899	Uncharacterized protein [Source:UniProtKB/TrEMBL;Acc:E1C7A1] [ENSGALT00000038009]	tc|TC436505	TC436505	1.37288	0.0078962	Rep: PREDICTED: testis-specific protein kinase 1 - Pan troglodytes, partial (11%) [TC436505]
ens|ENSGALT00000002177|gb|BX950813|gb|BX929863|tc|TC436484	TTC1	2.01026	0.00103141	tetratricopeptide repeat domain 1 [Source:HGNC Symbol;Acc:12391] [ENSGALT00000002177]	ref|NM_001012947|ens|ENSGALT00000027676|gb|AJ719315|tc|TC373813	XPO4	1.17633	0.00818445	Gallus gallus exportin 4 (XPO4), mRNA [NM_001012947]
ens|ENSGALT00000017084|ens|ENSGALT00000017130|gb|XM_427455|tc|NP9676594	COL25A1	3.3367	0.00103684	collagen, type XXV, alpha 1 [Source:HGNC Symbol;Acc:18603] [ENSGALT00000017084]	ens|ENSGALT00000001503|ens|ENSGALT00000040474	KIFC3	1.52821	0.00821168	Uncharacterized protein [Source:UniProtKB/TrEMBL;Acc:F1P0D6] [ENSGALT00000001503]
ens|ENSGALT00000004113|gb|DR417833|tc|TC410694|tc|TC383276	U2SURP	1.14297	0.0010413	U2 snRNP-associated SURP domain containing [Source:HGNC Symbol;Acc:30855] [ENSGALT00000004113]	ens|ENSGALT00000001892|tc|TC413602|ref|XM_414479	PPARGC1B	2.2482	0.00826664	peroxisome proliferator-activated receptor gamma, coactivator 1 beta [Source:HGNC Symbol;Acc:30022] [ENSGALT00000001892]
gb|CR524238|gb|CR387112|gb|AB570406|gb|BU352702	CR524238	1.84034	0.00105802	Gallus gallus finished cDNA, clone ChEST914n3. [CR524238]	ens|ENSGALT00000036966|gb|AJ452905|tc|TC409368	ENSGALT00000036966	1.71534	0.00829619	Uncharacterized protein [Source:UniProtKB/TrEMBL;Acc:F1NQR8] [ENSGALT00000036966]
	CO763633	1.68582	0.0010693	Target: CO763633; Description: CO763633 brain_EST06825 Brain cDNA Library Gallus gallus cDNA 5', mRNA sequence; Next best Hit: CO759416(alignment length 59bp with 98.31%identity)		CN219570	1.78722	0.00831883	Target: CN219570; Description: CN219570 WLA007G06.ab1 WLbrain Gallus gallus cDNA 5', mRNA sequence; Next best Hit: CN223764(alignment length 14bp with 100.00%identity)
ens|ENSGALT00000021213|tc|TC413815	ERC1	2.74363	0.00107259	ELKS/RAB6-interacting/CAST family member 1 [Source:HGNC Symbol;Acc:17072] [ENSGALT00000021213]	gb|BU441143|tc|TC384959|ref|XM_001232324	BU441143	2.36445	0.00838859	603209657F1 CSEQRBN11 Gallus gallus cDNA clone ChEST186b15 5', mRNA sequence [BU441143]
gb|CR386909	CR386909	2.33095	0.00107478	Gallus gallus finished cDNA, clone ChEST37j11. [CR386909]	tc|NP9665431	NP9665431	1.64559	0.00848256	GB
tc|NP9680515	NP9680515	3.1239	0.00108153	GB	ens|ENSGALT00000003144|gb|CR387697|tc|TC381353|tc|TC443510	GLUD1	1.52696	0.00863891	Uncharacterized protein [Source:UniProtKB/TrEMBL;Acc:F1P3F9] [ENSGALT00000003144]
ens|ENSGALT00000018221|gb|CR524170|gb|XM_416130|tc|TC383421	CEP290	1.6847	0.0010854	centrosomal protein 290kDa [Source:HGNC Symbol;Acc:29021] [ENSGALT00000018221]		CN225787	1.26122	0.00867689	Target: CN225787; Description: CN225787 WLA078C08.ab1 WLbrain Gallus gallus cDNA 5', mRNA sequence; Next best Hit: CN217079(alignment length 16bp with 100.00%identity)
ens|ENSGALT00000038461|ens|ENSGALT00000017930|gb|AJ001489	SCN9A	1.92293	0.00108618	Uncharacterized protein [Source:UniProtKB/TrEMBL;Acc:E1BQT8] [ENSGALT00000038461]	ens|ENSGALT00000040573|gb|CR524048|gb|BU290845|tc|TC392766	ENSGALT00000040573	1.5787	0.00868421	Gallus gallus finished cDNA, clone ChEST582n14. [CR524048]
ens|ENSGALT00000029077|tc|TC419397|tc|TC433397|tc|TC430156	ND6	1.71742	0.00109091	NADH-ubiquinone oxidoreductase chain 6 [Source:UniProtKB/Swiss-Prot;Acc:P18941] [ENSGALT00000029077]	ens|ENSGALT00000028398|gb|DR417380|tc|TC400135|ref|XM_423992	CIAO1	1.14622	0.00870288	cytosolic iron-sulfur protein assembly 1 [Source:HGNC Symbol;Acc:14280] [ENSGALT00000028398]
ens|ENSGALT00000000276|gb|XM_413971|tc|TC383607	MCC	2.74869	0.00110589	mutated in colorectal cancers [Source:HGNC Symbol;Acc:6935] [ENSGALT00000000276]		CN222278	2.92028	0.00874106	Target: CN222278; Description: CN222278 RJA084A05.ab1 RJbrain Gallus gallus cDNA 5', mRNA sequence; Next best Hit: A_87_P073521(alignment length 15bp with 100.00%identity)
	CN220428	1.20561	0.00113407	Target: CN220428; Description: CN220428 WLA015H09.ab1 WLbrain Gallus gallus cDNA 5', mRNA sequence; Next best Hit: CN221609(alignment length 46bp with 100.00%identity)	gb|CR385940|gb|BU233281|tc|TC409381|tc|TC429263	CR385940	2.59952	0.00888596	Gallus gallus finished cDNA, clone ChEST568d22. [CR385940]
ens|ENSGALT00000023315|gb|XM_424188|tc|TC387291	GPAT2	1.69614	0.00113599	glycerol-3-phosphate acyltransferase 2, mitochondrial [Source:HGNC Symbol;Acc:27168] [ENSGALT00000023315]	ref|NM_204573|gb|AB056475|tc|TC373460	LOC395260	2.05493	0.00908484	Gallus gallus cgABP260 (LOC395260), mRNA [NM_204573]
ens|ENSGALT00000014182|ref|XM_001232771|ref|XM_001232712|ref|XM_003641566	ABI2	1.30105	0.00113654	abl-interactor 2 [Source:HGNC Symbol;Acc:24011] [ENSGALT00000014182]	ref|NM_001130387|gb|EU057149|tc|TC375522	IFNGR1	1.97951	0.00910337	Gallus gallus interferon gamma receptor 1 (IFNGR1), mRNA [NM_001130387]
gb|CR389058|gb|XM_416310|tc|TC441279|tc|TC427078	CR389058	1.77368	0.00113672	Gallus gallus finished cDNA, clone ChEST830o22. [CR389058]	gb|CR405940	CR405940	1.32753	0.00912198	Gallus gallus finished cDNA, clone ChEST701e22. [CR405940]
gb|CR391416|tc|TC404901	CR391416	2.37883	0.00113895	Gallus gallus finished cDNA, clone ChEST653p20. [CR391416]		CN222460	2.80396	0.00913189	Target: CN222460; Description: CN222460 WLA041B04.ab1 WLbrain Gallus gallus cDNA 5', mRNA sequence; Next best Hit: CN225923(alignment length 60bp with 100.00%identity)
ens|ENSGALT00000022615|gb|BX933406	ENSGALT00000022615	2.4589	0.00114363	Uncharacterized protein [Source:UniProtKB/TrEMBL;Acc:E1BW81] [ENSGALT00000022615]	ens|ENSGALT00000001861|gb|XM_001232430|tc|TC384819	PIK3R6	2.8162	0.00922715	Uncharacterized protein [Source:UniProtKB/TrEMBL;Acc:F1P0U2] [ENSGALT00000001861]
	CO764156	2.29416	0.00116526	Target: CO764156; Description: CO764156 brain_EST07348 Brain cDNA Library Gallus gallus cDNA 5', mRNA sequence; Next best Hit: CO764171(alignment length 60bp with 100.00%identity)	ref|NM_204279|ens|ENSGALT00000035444|gb|AF075160|tc|TC375251	KCND2	2.38364	0.00926262	Gallus gallus potassium voltage-gated channel, Shal-related subfamily, member 2 (KCND2), mRNA [NM_204279]
ref|NM_001130740|ens|ENSGALT00000026826|gb|EU419877|gb|CO759802	PNPLA4	1.91938	0.00116552	Gallus gallus patatin-like phospholipase domain containing 4 (PNPLA4), mRNA [NM_001130740]		W66570	2.74285	0.00934373	Target: W66570; Description: W66570 EST034 chicken liver cDNA library, Stratagene (cat.#935402) Gallus gallus cDNA clone CLEST065 similar to Chicken c-fos proto-oncogene mRNA, mRNA sequence; Next best Hit: CO761906(alignment length 30bp with 90.00%identi
	GT_EA606_A_87_P168643	1.55962	0.00118582	Unknown	ens|ENSGALT00000037995	ENSGALT00000037995	1.62463	0.00943898	Uncharacterized protein [Source:UniProtKB/TrEMBL;Acc:E1C7B3] [ENSGALT00000037995]
tc|NP9675059|ref|XM_001234648	NP9675059	3.9947	0.00119686	GB	gb|L48877	L48877	1.85851	0.00952331	Gallus gallus clone cDNA1A microsatellite MCW144 sequence. [L48877]
gb|CR386804	CR386804	3.64231	0.00119721	Gallus gallus finished cDNA, clone ChEST1008j18. [CR386804]	ens|ENSGALT00000016258|ens|ENSGALT00000038570|gb|AF526419|tc|NP520283	POU4F2	1.35319	0.0095495	Uncharacterized protein [Source:UniProtKB/TrEMBL;Acc:F1P2C9] [ENSGALT00000016258]
ens|ENSGALT00000017930	SCN9A	3.12595	0.00121751	Uncharacterized protein [Source:UniProtKB/TrEMBL;Acc:E1BQT8] [ENSGALT00000017930]	tc|NP9676219	NP9676219	1.61915	0.00969035	GB
ref|NM_001031386|ens|ENSGALT00000023283|gb|AJ720981|tc|TC442671	CIR1	2.61433	0.0012292	Gallus gallus corepressor interacting with RBPJ, 1 (CIR1), mRNA [NM_001031386]	ref|NM_001113291|ens|ENSGALT00000023495|gb|EU419874|gb|EU852334	PNPLA2	2.23091	0.00974633	Gallus gallus patatin-like phospholipase domain containing 2 (PNPLA2), mRNA [NM_001113291]
ens|ENSGALT00000025182|ens|ENSGALT00000025181|gb|AJ008002|gb|XM_418290	ENSGALT00000025182	1.57485	0.00125418	Eyes absent homolog 1 [Source:UniProtKB/Swiss-Prot;Acc:Q9YHA0] [ENSGALT00000025182]	ref|NM_204279|ens|ENSGALT00000035444|gb|AF075160|tc|TC375251	KCND2	2.46511	0.00975783	Gallus gallus potassium voltage-gated channel, Shal-related subfamily, member 2 (KCND2), mRNA [NM_204279]
ref|NM_204372|ens|ENSGALT00000026860|ens|ENSGALT00000026858|gb|AF534911	ARSH	1.09995	0.00125975	Gallus gallus arylsulfatase family, member H (ARSH), mRNA [NM_204372]	ens|ENSGALT00000031715	ENSGALT00000031715	1.55413	0.0099049	Uncharacterized protein [Source:UniProtKB/TrEMBL;Acc:F1NWF5] [ENSGALT00000031715]
	CO762187	1.68806	0.0012694	Target: CO762187; Description: CO762187 brain_EST05379 Brain cDNA Library Gallus gallus cDNA 5', mRNA sequence; Next best Hit: CO760912(alignment length 60bp with 95.00%identity)	tc|TC442885	TC442885	1.13354	0.00993977	Rep: PE-PGRS family protein - Anaeromyxobacter dehalogenans (strain 2CP-C), partial (6%) [TC442885]
	CO760226	1.61192	0.00127429	Target: CO760226; Description: CO760226 brain_EST03418 Brain cDNA Library Gallus gallus cDNA 5', mRNA sequence; Next best Hit: CO763981(alignment length 60bp with 96.67%identity)	ens|ENSGALT00000002605|gb|XM_001231685	SAG	2.28134	0.0100209	S-antigen; retina and pineal gland (arrestin) [Source:HGNC Symbol;Acc:10521] [ENSGALT00000002605]
gb|CR733292	CR733292	7.31901	0.00130995	Gallus gallus finished cDNA, clone ChEST241g19. [CR733292]	ens|ENSGALT00000017760|ens|ENSGALT00000005016|gb|CR386000|gb|XM_415436	ENSGALT00000017760	1.60008	0.0100607	Uncharacterized protein [Source:UniProtKB/TrEMBL;Acc:F1NQP7] [ENSGALT00000005016]
gb|BX932861	BX932861	3.04272	0.00131036	Gallus gallus finished cDNA, clone ChEST713k22. [BX932861]	tc|NP9668346	NP9668346	1.78556	0.0101277	GB
ens|ENSGALT00000022506|gb|BX950626|gb|BX936252|gb|AY189903	TIA1	1.27805	0.00131293	TIA-1Uncharacterized protein [Source:UniProtKB/TrEMBL;Acc:Q800W4] [ENSGALT00000022506]	tc|NP9670843	NP9670843	1.2205	0.0102578	GB
gb|CR338809|tc|TC408128	CR338809	2.78263	0.00131586	Gallus gallus finished cDNA, clone ChEST962f9. [CR338809]		CN223854	2.82945	0.0102824	Target: CN223854; Description: CN223854 RJA018G02.ab1 RJbrain Gallus gallus cDNA 5', mRNA sequence; Next best Hit: CN225937(alignment length 14bp with 100.00%identity)
ref|NM_001031183|ens|ENSGALT00000011390|ens|ENSGALT00000032683|gb|AJ851429	PPP6R3	1.89216	0.00133376	Gallus gallus protein phosphatase 6, regulatory subunit 3 (PPP6R3), mRNA [NM_001031183]	ens|ENSGALT00000014388|gb|XM_415544|tc|TC436153	PRPF4	1.04537	0.0103222	PRP4 pre-mRNA processing factor 4 homolog (yeast) [Source:HGNC Symbol;Acc:17349] [ENSGALT00000014388]
ens|ENSGALT00000029081|tc|TC375876|tc|TC436032	ND5	1.73584	0.00134201	NADH-ubiquinone oxidoreductase chain 5 [Source:UniProtKB/Swiss-Prot;Acc:P18940] [ENSGALT00000029081]	gb|XM_419569|tc|TC381614|tc|TC380604|ref|XM_001231253	XM_419569	1.57178	0.0103801	PREDICTED: Gallus gallus similar to Chain A, Crystal Structure Of Hif Prolyl Hydroxylase Egln-1 In Complex With A Biologically Active Inhibitor (LOC421528), mRNA [XM_419569]
ens|ENSGALT00000019343|gb|XM_001233540|tc|TC415811	C1H7orf55	1.90142	0.00134385	chromosome 7 open reading frame 55 [Source:HGNC Symbol;Acc:26946] [ENSGALT00000019343]	ref|NM_001030957|ens|ENSGALT00000031308|gb|AJ720446|tc|TC422606	HIGD1A	1.29246	0.0104656	Gallus gallus HIG1 hypoxia inducible domain family, member 1A (HIGD1A), mRNA [NM_001030957]
ref|NM_001098539|ens|ENSGALT00000014876|tc|TC386851|tc|TC387493	CTTNBP2	3.11521	0.00136372	Gallus gallus cortactin binding protein 2 (CTTNBP2), mRNA [NM_001098539]	ens|ENSGALT00000015924|gb|BX950800|tc|TC403034|tc|TC382080	SMYD2	2.28462	0.0106333	N-lysine methyltransferase SMYD2 [Source:UniProtKB/Swiss-Prot;Acc:E1C5V0] [ENSGALT00000015924]
ens|ENSGALT00000027450|ens|ENSGALT00000027449	LRCH1	1.56026	0.00137388	leucine-rich repeats and calponin homology (CH) domain containing 1 [Source:HGNC Symbol;Acc:20309] [ENSGALT00000027450]	ens|ENSGALT00000029975|ens|ENSGALT00000007272|gb|DR431218|tc|TC386199	UNC5A	1.68969	0.0106837	unc-5 homolog A (C. elegans) [Source:HGNC Symbol;Acc:12567] [ENSGALT00000029975]
gb|CR387898	CR387898	2.31752	0.00138177	Gallus gallus finished cDNA, clone ChEST326i13. [CR387898]	ref|NM_001031485|gb|AJ720246|tc|TC374132	WDR3	1.36982	0.0107043	Gallus gallus WD repeat domain 3 (WDR3), mRNA [NM_001031485]
	DQ003271	2.65233	0.00138845	Target: DQ003271; Description: DQ003271 DQ003271 Abar acer meat liver newborn Gallus gallus cDNA clone Z1, mRNA sequence; Next best Hit: CN216862(alignment length 16bp with 100.00%identity)	ens|ENSGALT00000001489|gb|CR391232|gb|XM_413995|tc|TC426143	MMP15	1.24945	0.010743	matrix metallopeptidase 15 (membrane-inserted) [Source:HGNC Symbol;Acc:7161] [ENSGALT00000001489]
ens|ENSGALT00000017241|ens|ENSGALT00000037970	FEZ2	1.61084	0.00139733	fasciculation and elongation protein zeta 2 (zygin II) [Source:HGNC Symbol;Acc:3660] [ENSGALT00000017241]		CN223327	2.06929	0.0107659	Target: CN223327; Description: CN223327 RJA093A12.ab1 RJbrain Gallus gallus cDNA 5', mRNA sequence; Next best Hit: CN221296(alignment length 60bp with 91.67%identity)
ref|NM_001122763|ens|ENSGALT00000023944|gb|BX934858|gb|BX934214	RPL37	2.21629	0.00142741	Gallus gallus ribosomal protein L37 (RPL37), mRNA [NM_001122763]		CO760152	1.69931	0.0108537	Target: CO760152; Description: CO760152 brain_EST03344 Brain cDNA Library Gallus gallus cDNA 5', mRNA sequence; Next best Hit: CO760568(alignment length 60bp with 100.00%identity)
gb|XM_415266	POP5	2.88355	0.00143122	PREDICTED: Gallus gallus processing of precursor 5, ribonuclease P [XM_415266]	ens|ENSGALT00000022470|ens|ENSGALT00000022469|gb|XM_428283|tc|TC377148	ENSGALT00000022470	1.6621	0.010897	PREDICTED: Gallus gallus hypothetical LOC430731 (LOC430731), mRNA [XM_428283]
gb|XR_027198|tc|TC443859	XR_027198	1.05495	0.0014401	PREDICTED: Gallus gallus similar to PLCG1 variant protein (LOC419175), mRNA [XR_027198]		GT_EA606_A_87_P303838	1.58506	0.0109001	Unknown
gb|CR390794	CR390794	1.8116	0.00144808	Gallus gallus finished cDNA, clone ChEST604o3. [CR390794]	ref|NM_204694|gb|U20281|gb|AF035530|gb|U25026	CDC37	1.47388	0.0109271	Gallus gallus cell division cycle 37 homolog (S. cerevisiae) (CDC37), mRNA [NM_204694]
gb|CR388504|gb|BX931692|tc|TC424560|tc|TC435672	CR388504	1.08215	0.00145187	Gallus gallus finished cDNA, clone ChEST1016a8. [CR388504]	gb|BX950760|gb|CR407391|gb|CR352787|gb|CR524361	AMN1	1.03538	0.011009	Gallus gallus finished cDNA, clone ChEST813d11. [BX950760]
ens|ENSGALT00000027934|gb|EU083318|gb|BU340932|tc|TC388462	KCNA1	5.09831	0.00145838	potassium voltage-gated channel, shaker-related subfamily, member 1 (episodic ataxia with myokymia) [Source:HGNC Symbol;Acc:6218] [ENSGALT00000027934]		BG641641	4.25527	0.0110726	Target: BG641641; Description: BG641641 pgl1c.pk001.j4 Chicken liver cDNA library Gallus gallus cDNA clone pgl1c.pk001.j4 ; Next best Hit: A_87_P307148(alignment length 13bp with 100.00%identity)
ens|ENSGALT00000015096|gb|XR_026983|tc|NP9667409|ref|XM_003640330	ENSGALT00000015096	1.28212	0.00145919	Scm-like with four mbt domains 2 [Source:HGNC Symbol;Acc:20256] [ENSGALT00000015096]	ref|NM_001012908|ens|ENSGALT00000012296|gb|CR353905|gb|AJ720149	RRP12	2.10275	0.0111668	Gallus gallus ribosomal RNA processing 12 homolog (S. cerevisiae) (RRP12), mRNA [NM_001012908]
ref|NM_001031296|ens|ENSGALT00000018443|ens|ENSGALT00000018445|gb|AJ720592	SRSF11	2.75734	0.00148278	Gallus gallus serine/arginine-rich splicing factor 11 (SRSF11), mRNA [NM_001031296]	tc|NP9665673	NP9665673	2.05582	0.0112847	GB
ens|ENSGALT00000004572|gb|CR407437|tc|TC381355|tc|TC412926	SLC16A14	1.57009	0.00148705	solute carrier family 16, member 14 (monocarboxylic acid transporter 14) [Source:HGNC Symbol;Acc:26417] [ENSGALT00000004572]	gb|CR385343|gb|CR406330|gb|CR388945|tc|TC404248	CR385343	1.1088	0.0113461	Gallus gallus finished cDNA, clone ChEST408b3. [CR385343]
ref|NM_001039260|ens|ENSGALT00000000991|gb|CR385623|gb|AJ851473	WWP2	2.40905	0.00148938	Gallus gallus WW domain containing E3 ubiquitin protein ligase 2 (WWP2), mRNA [NM_001039260]	gb|CR388908|ref|XR_140110	CR388908	2.07074	0.0113877	Gallus gallus finished cDNA, clone ChEST171e8. [CR388908]
ens|ENSGALT00000025694|gb|XM_419884|tc|TC389293	RIMS1	2.9494	0.00149255	regulating synaptic membrane exocytosis 1 [Source:HGNC Symbol;Acc:17282] [ENSGALT00000025694]		CO760383	1.53631	0.011416	Target: CO760383; Description: CO760383 brain_EST03575 Brain cDNA Library Gallus gallus cDNA 5', mRNA sequence; Next best Hit: A_87_P174048(alignment length 20bp with 100.00%identity)
ens|ENSGALT00000037567	ENSGALT00000037567	3.23342	0.00149817	Uncharacterized protein [Source:UniProtKB/TrEMBL;Acc:F1NJX2] [ENSGALT00000037567]	gb|XM_415535|tc|TC379931	NELF	1.1943	0.0114255	PREDICTED: Gallus gallus hypothetical LOC417260 (LOC417260), mRNA [XM_415535]
gb|CR389072|gb|CF254008|tc|TC417760|tc|TC409814	CR389072	1.034	0.00150577	Gallus gallus finished cDNA, clone ChEST836i18. [CR389072]	gb|BX934821	BX934821	1.25982	0.0115068	Gallus gallus finished cDNA, clone ChEST559n13. [BX934821]
gb|CR391675	CR391675	1.49885	0.00151235	Gallus gallus finished cDNA, clone ChEST238e12. [CR391675]		A_87_P170443	2.10459	0.011517	; Next best Hit: CN222965(alignment length 60bp with 100.00%identity)
ens|ENSGALT00000021577	ENSGALT00000021577	1.48572	0.00157671	Uncharacterized protein [Source:UniProtKB/TrEMBL;Acc:E1BQJ6] [ENSGALT00000021577]	ref|NM_204177|ens|ENSGALT00000021652|gb|AF069771|gb|AF218799	LDHB	1.69735	0.0115531	Gallus gallus lactate dehydrogenase B (LDHB), mRNA [NM_204177]
gb|XM_415107|tc|TC417518|tc|TC377465	NCOR2	1.75374	0.00157863	PREDICTED: Gallus gallus similar to silencing mediator of retinoic acid and thyroid hormone receptor alpha (LOC416815), mRNA [XM_415107]	gb|BX934842	BX934842	2.36466	0.0115615	Gallus gallus finished cDNA, clone ChEST559f17. [BX934842]
gb|XM_426548|tc|TC385346	JAKMIP3	1.80804	0.00158825	PREDICTED: Gallus gallus similar to mKIAA4091 protein (LOC428991), mRNA [XM_426548]	gb|EU240299|gb|AF375473	EU240299	1.42626	0.0115866	Gallus gallus clone 2774 GGN83 snoRNA, complete sequence. [EU240299]
	CN221031	2.08967	0.00160109	Target: CN221031; Description: CN221031 WLA029E01.ab1 WLbrain Gallus gallus cDNA 5', mRNA sequence; Next best Hit: CO761431(alignment length 16bp with 100.00%identity)	ens|ENSGALT00000031799|gb|XM_419668|tc|TC433324|tc|TC380006	LRP11	3.09478	0.0117357	low density lipoprotein receptor-related protein 11 [Source:HGNC Symbol;Acc:16936] [ENSGALT00000031799]
ens|ENSGALT00000036286|gb|BX270426|tc|TC420079|tc|TC412966	ENSGALT00000036286	1.2489	0.00163044	Uncharacterized protein [Source:UniProtKB/TrEMBL;Acc:F1N8M9] [ENSGALT00000036286]		CN222329	2.34548	0.0117854	Target: CN222329; Description: CN222329 WLA040B04.ab1 WLbrain Gallus gallus cDNA 5', mRNA sequence; Next best Hit: A_87_P174413(alignment length 15bp with 100.00%identity)
ens|ENSGALT00000025689|gb|CO773447|tc|TC382932|ref|XM_418334	TMEM67	2.22199	0.00163135	transmembrane protein 67 [Source:HGNC Symbol;Acc:28396] [ENSGALT00000025689]	ref|NM_001030889|ens|ENSGALT00000000878|ens|ENSGALT00000041207|gb|BX935814	FABP3	1.25261	0.0118565	Gallus gallus fatty acid binding protein 3, muscle and heart (mammary-derived growth inhibitor) (FABP3), mRNA [NM_001030889]
ens|ENSGALT00000011570|gb|XM_417903|tc|TC383827|ref|XM_003642604	ENSGALT00000011570	1.95902	0.00166183	SIK family kinase 3 [Source:HGNC Symbol;Acc:29165] [ENSGALT00000011570]	ens|ENSGALT00000001583|gb|BX934384|gb|BX935749|ref|XM_415721	ABHD11	1.31918	0.0118932	abhydrolase domain containing 11 [Source:HGNC Symbol;Acc:16407] [ENSGALT00000001583]
gb|XM_417686	R3HCC1	2.41569	0.00166795	PREDICTED: Gallus gallus R3H domain and coiled-coil containing 1 (R3HCC1), mRNA [XM_417686]	ens|ENSGALT00000039170	ENSGALT00000039170	1.73835	0.0119367	Uncharacterized protein [Source:UniProtKB/TrEMBL;Acc:F1NN07] [ENSGALT00000039170]
	CN225613	1.09862	0.00166843	Target: CN225613; Description: CN225613 WLA074H06.ab1 WLbrain Gallus gallus cDNA 5', mRNA sequence; Next best Hit: BG641641(alignment length 14bp with 100.00%identity)		CO760092	1.72207	0.0120364	Target: CO760092; Description: CO760092 brain_EST03284 Brain cDNA Library Gallus gallus cDNA 5', mRNA sequence; Next best Hit: CN219540(alignment length 14bp with 100.00%identity)
	CN218014	3.05597	0.00167586	Target: CN218014; Description: CN218014 RJA022E06.ab1 RJbrain Gallus gallus cDNA 5', mRNA sequence; Next best Hit: CN217260(alignment length 15bp with 100.00%identity)	ens|ENSGALT00000035294|tc|TC422157|tc|TC423388|tc|TC400356	ENSGALT00000035294	3.89086	0.0120705	Uncharacterized protein [Source:UniProtKB/TrEMBL;Acc:F1NTN5] [ENSGALT00000035294]
ref|NM_205266|ens|ENSGALT00000015492|ens|ENSGALT00000015491|ens|ENSGALT00000015490	NRCAM	2.97245	0.00168616	Gallus gallus neuronal cell adhesion molecule (NRCAM), mRNA [NM_205266]		CN224435	2.93373	0.0123174	Target: CN224435; Description: CN224435 RJA101C09.ab1 RJbrain Gallus gallus cDNA 5', mRNA sequence; Next best Hit: A_87_P018746(alignment length 13bp with 100.00%identity)
	CN236408	6.47918	0.00169908	Target: CN236408; Description: CN236408 WLA110H05.ab1 WLbrain Gallus gallus cDNA 5', mRNA sequence; Next best Hit: CN221876(alignment length 15bp with 100.00%identity)	ens|ENSGALT00000030633	ENSGALT00000030633	5.32312	0.012574	Uncharacterized protein [Source:UniProtKB/TrEMBL;Acc:F1NLT7] [ENSGALT00000030633]
ens|ENSGALT00000030823|gb|CO770346|tc|TC384894|ref|XM_418368	ENSGALT00000030823	2.19002	0.00171801	Uncharacterized protein [Source:UniProtKB/TrEMBL;Acc:E1BW80] [ENSGALT00000030823]	gb|CR390095	CR390095	1.46284	0.0125755	Gallus gallus finished cDNA, clone ChEST1009o15. [CR390095]
gb|CR353687	CR353687	4.55955	0.00172132	Gallus gallus finished cDNA, clone ChEST234b3. [CR353687]		CN234113	1.5976	0.0126767	Target: CN234113; Description: CN234113 WLA095E03.ab1 WLbrain Gallus gallus cDNA 5', mRNA sequence; Next best Hit: CN218817(alignment length 16bp with 100.00%identity)
	CN217439	2.50238	0.00173149	Target: CN217439; Description: CN217439 RJA012C07.ab1 RJbrain Gallus gallus cDNA 5', mRNA sequence; Next best Hit: CN225276(alignment length 15bp with 100.00%identity)		CN217895	1.71783	0.0127001	Target: CN217895; Description: CN217895 RJA020G02.ab1 RJbrain Gallus gallus cDNA 5', mRNA sequence; Next best Hit: A_87_P086901(alignment length 60bp with 98.33%identity)
ref|NM_001031327|ens|ENSGALT00000023608|ens|ENSGALT00000031431|gb|AJ720009	RIT1	1.26633	0.00173301	Gallus gallus Ras-like without CAAX 1 (RIT1), mRNA [NM_001031327]	ref|NM_204405|ens|ENSGALT00000010491|gb|AB082935|tc|TC374343	ANKRD1	3.26676	0.0127044	Gallus gallus ankyrin repeat domain 1 (cardiac muscle) (ANKRD1), mRNA [NM_204405]
ref|NM_001162400|ens|ENSGALT00000027713|gb|CR733349|tc|TC420825	ATM	1.43149	0.00174782	Gallus gallus ataxia telangiectasia mutated (ATM), mRNA [NM_001162400]		CN217189	3.41717	0.0127439	Target: CN217189; Description: CN217189 RJA006F06.ab1 RJbrain Gallus gallus cDNA 5', mRNA sequence; Next best Hit: CN218113(alignment length 60bp with 100.00%identity)
ens|ENSGALT00000024346|tc|TC378339|ref|XM_416569	ZBTB20	1.77916	0.00176672	zinc finger and BTB domain containing 20 [Source:HGNC Symbol;Acc:13503] [ENSGALT00000024346]	ens|ENSGALT00000030942|tc|TC381283|ref|XM_001232975	LRRC30	2.44222	0.012797	leucine rich repeat containing 30 [Source:HGNC Symbol;Acc:30219] [ENSGALT00000030942]
	CN218775	1.14523	0.00178022	Target: CN218775; Description: CN218775 RJA039D05.ab1 RJbrain Gallus gallus cDNA 5', mRNA sequence; Next best Hit: CO764175(alignment length 16bp with 100.00%identity)	ref|NM_001031477|ens|ENSGALT00000028042|ens|ENSGALT00000040251|gb|AJ851534	YWHAG	1.90281	0.012813	Gallus gallus tyrosine 3-monooxygenase/tryptophan 5-monooxygenase activation protein, gamma polypeptide (YWHAG), mRNA [NM_001031477]
ens|ENSGALT00000016532|gb|BX929343	PNN	1.47559	0.00178752	pinin, desmosome associated protein [Source:HGNC Symbol;Acc:9162] [ENSGALT00000016532]	ref|NM_001130738|gb|EU419879	PLA2G6	2.91126	0.012842	Gallus gallus phospholipase A2, group VI (cytosolic, calcium-independent) (PLA2G6), mRNA [NM_001130738]
ens|ENSGALT00000005468|ens|ENSGALT00000009435|gb|CR388558|tc|TC393273	ENSGALT00000005468	5.98597	0.00181355	minichromosome maintenance complex component 10 [Source:HGNC Symbol;Acc:18043] [ENSGALT00000005468]		CN221193	1.16248	0.0128639	Target: CN221193; Description: CN221193 RJA073F02.ab1 RJbrain Gallus gallus cDNA 5', mRNA sequence; Next best Hit: CN217521(alignment length 14bp with 100.00%identity)
	CN223247	2.31956	0.00182285	Target: CN223247; Description: CN223247 WLA048A11.ab1 WLbrain Gallus gallus cDNA 5', mRNA sequence; Next best Hit: CO760495(alignment length 15bp with 100.00%identity)	ref|NM_001012812|ens|ENSGALT00000019258|gb|CR353693|gb|AJ851637	KIAA1467	3.13451	0.012872	Gallus gallus KIAA1467 (KIAA1467), mRNA [NM_001012812]
	CN219425	1.92176	0.00182421	Target: CN219425; Description: CN219425 WLA006A03.ab1 WLbrain Gallus gallus cDNA 5', mRNA sequence; Next best Hit: CN224982(alignment length 60bp with 100.00%identity)	ens|ENSGALT00000013227|gb|XM_413937|tc|TC384252	UACA	1.7287	0.012892	uveal autoantigen with coiled-coil domains and ankyrin repeats [Source:HGNC Symbol;Acc:15947] [ENSGALT00000013227]
ens|ENSGALT00000008470|gb|CR385906|gb|BU466917	NKTR	2.00744	0.00188878	natural killer-tumor recognition sequence [Source:HGNC Symbol;Acc:7833] [ENSGALT00000008470]	gb|CR390166|tc|TC414132	CR390166	1.7537	0.0129183	Gallus gallus finished cDNA, clone ChEST932m4. [CR390166]
	CO762883	1.64191	0.00189729	Target: CO762883; Description: CO762883 brain_EST06075 Brain cDNA Library Gallus gallus cDNA 5', mRNA sequence; Next best Hit: CO762033(alignment length 43bp with 86.05%identity)	ens|ENSGALT00000006993|tc|NP9676081|ref|XM_001233833	LOC770492	3.30278	0.0129541	Uncharacterized protein [Source:UniProtKB/TrEMBL;Acc:E1BWA0] [ENSGALT00000006993]
ens|ENSGALT00000017127|gb|EU702429|gb|EU702428|gb|EU702430	NRXN3	2.20712	0.00190072	neurexin 3 [Source:HGNC Symbol;Acc:8010] [ENSGALT00000017127]	ens|ENSGALT00000007290|ref|XM_414592	NDST1	1.29283	0.0130229	N-deacetylase/N-sulfotransferase (heparan glucosaminyl) 1 [Source:HGNC Symbol;Acc:7680] [ENSGALT00000007290]
ens|ENSGALT00000039310|tc|TC430654	ENSGALT00000039310	1.88939	0.00191464	Uncharacterized protein [Source:UniProtKB/TrEMBL;Acc:E1BWA5] [ENSGALT00000039310]		GT_EA606_A_87_P307383	1.79665	0.0131732	Unknown
ens|ENSGALT00000030455|ens|ENSGALT00000024340|gb|XM_425527|tc|TC432712	GAP43	2.20374	0.0019272	growth associated protein 43 [Source:HGNC Symbol;Acc:4140] [ENSGALT00000030455]		CN224401	1.34003	0.0131752	Target: CN224401; Description: CN224401 WLA056C05.ab1 WLbrain Gallus gallus cDNA 5', mRNA sequence; Next best Hit: CO759042(alignment length 15bp with 100.00%identity)
	CN217140	2.29168	0.00194128	Target: CN217140; Description: CN217140 RJA005H07.ab1 RJbrain Gallus gallus cDNA 5', mRNA sequence; Next best Hit: CN221854(alignment length 60bp with 100.00%identity)	gb|BU319139|tc|TC418948|tc|TC378238|ref|XM_420400	BU319139	1.85668	0.0132254	603852819F1 CSEQCHN62 Gallus gallus cDNA clone ChEST852e5 5', mRNA sequence [BU319139]
ens|ENSGALT00000019085|gb|CR387668|gb|CR406092|gb|CR387529	HSPBAP1	1.00705	0.00195636	HSPB (heat shock 27kDa) associated protein 1 [Source:HGNC Symbol;Acc:16389] [ENSGALT00000019085]	ref|NM_204453|ens|ENSGALT00000037147|ens|ENSGALT00000037149|ens|ENSGALT00000025529	TBX18	1.31592	0.0132307	Gallus gallus T-box 18 (TBX18), mRNA [NM_204453]
	CN225365	3.0611	0.00197263	Target: CN225365; Description: CN225365 WLA071A12.ab1 WLbrain Gallus gallus cDNA 5', mRNA sequence; Next best Hit: CN222066(alignment length 14bp with 100.00%identity)	ens|ENSGALT00000007819	ENSGALT00000007819	1.23195	0.0132549	Uncharacterized protein [Source:UniProtKB/TrEMBL;Acc:E1BVL4] [ENSGALT00000007819]
ens|ENSGALT00000018715|gb|XM_422071|tc|TC383894	2013-03-04	2.5022	0.0019803	membrane-associated ring finger (C3HC4) 4 [Source:HGNC Symbol;Acc:29269] [ENSGALT00000018715]		CN218307	1.24292	0.0132701	Target: CN218307; Description: CN218307 RJA028C03.ab1 RJbrain Gallus gallus cDNA 5', mRNA sequence; Next best Hit: A_87_P079306(alignment length 20bp with 95.00%identity)
ens|ENSGALT00000013945|gb|BU465304	SMNDC1	1.35658	0.0019893	survival motor neuron domain containing 1 [Source:HGNC Symbol;Acc:16900] [ENSGALT00000013945]	ens|ENSGALT00000013590|tc|TC383007|ref|XM_414443	LMCD1	1.8921	0.0132895	LIM and cysteine-rich domains 1 [Source:HGNC Symbol;Acc:6633] [ENSGALT00000013590]
ens|ENSGALT00000024993|ens|ENSGALT00000011374|gb|CR386810|gb|BX935151	CADM2	1.59587	0.00199104	cell adhesion molecule 2 [Source:HGNC Symbol;Acc:29849] [ENSGALT00000024993]	gb|BX950311|gb|BX934415|tc|TC408101|tc|TC418126	BX950311	1.47567	0.0133473	Gallus gallus finished cDNA, clone ChEST296l7. [BX950311]
tc|TC381925|ref|XM_417607|ref|XM_003642511	TC381925	2.62559	0.00199154	Rep: Ubiquitin conjugation factor E4 B (Ubiquitin fusion degradation protein 2) (Homozygously deleted in neuroblastoma 1). - Gallus gallus, partial (98%) [TC381925]	gb|XM_419569|tc|TC380604|ref|XM_001231253	XM_419569	1.30315	0.0133594	PREDICTED: Gallus gallus similar to Chain A, Crystal Structure Of Hif Prolyl Hydroxylase Egln-1 In Complex With A Biologically Active Inhibitor (LOC421528), mRNA [XM_419569]
gb|CR406675|tc|TC426362	CR406675	2.22903	0.00200099	Gallus gallus finished cDNA, clone ChEST290i21. [CR406675]	gb|CR391112|gb|XR_027149|tc|TC387563|ref|XM_003640490	PPEF1	5.23487	0.0133948	Gallus gallus finished cDNA, clone ChEST201a2. [CR391112]
gb|CR387431|tc|TC437335|tc|TC437620|tc|TC442895	CR387431	1.80022	0.00200106	Gallus gallus finished cDNA, clone ChEST2g24. [CR387431]		CN217583	2.01467	0.0133984	Target: CN217583; Description: CN217583 RJA015A09.ab1 RJbrain Gallus gallus cDNA 5', mRNA sequence; Next best Hit: CN234932(alignment length 60bp with 100.00%identity)
ens|ENSGALT00000032583	ENSGALT00000032583	2.38433	0.00201206	Uncharacterized protein [Source:UniProtKB/TrEMBL;Acc:F1NJ70] [ENSGALT00000032583]	ens|ENSGALT00000034208|gb|BX933422|gb|CR387187|gb|BX931845	ENSGALT00000034208	2.63828	0.0134248	transmembrane protein 141 [Source:HGNC Symbol;Acc:28211] [ENSGALT00000034208]
ref|NM_001012799|ens|ENSGALT00000007603|gb|CR389723|gb|AJ720079	ODF2	2.41103	0.00201296	Gallus gallus outer dense fiber of sperm tails 2 (ODF2), mRNA [NM_001012799]	ens|ENSGALT00000036939|ref|XM_003640453	ENSGALT00000036939	5.29357	0.0134873	Uncharacterized protein [Source:UniProtKB/TrEMBL;Acc:E1C161] [ENSGALT00000036939]
gb|BX257537	BX257537	1.226	0.00201318	BX257537 AGENAE Gallus gallus multi-tissues normalized library (gcag) Gallus gallus cDNA clone gcag0001.o.12 3prim, mRNA sequence [BX257537]	ens|ENSGALT00000011568|gb|XM_415267	RNF10	1.15343	0.0135026	ring finger protein 10 [Source:HGNC Symbol;Acc:10055] [ENSGALT00000011568]
gb|BX930953	KIAA0922	2.29753	0.00201622	Gallus gallus finished cDNA, clone ChEST62l13. [BX930953]	ref|NM_001006130|ens|ENSGALT00000009099|ens|ENSGALT00000039042|gb|AJ720400	USP10	1.28914	0.0135126	Gallus gallus ubiquitin specific peptidase 10 (USP10), mRNA [NM_001006130]
	CN218267	1.85659	0.00201874	Target: CN218267; Description: CN218267 RJA027F06.ab1 RJbrain Gallus gallus cDNA 5', mRNA sequence; Next best Hit: CN221452(alignment length 35bp with 88.57%identity)	ref|NM_001030601|ens|ENSGALT00000011199|ens|ENSGALT00000036236|gb|AJ851396	IMPDH2	1.15783	0.013558	Gallus gallus IMP (inosine 5'-monophosphate) dehydrogenase 2 (IMPDH2), mRNA [NM_001030601]
ens|ENSGALT00000014844|gb|BX932093|tc|TC376091	PIT 54	1.03746	0.00201886	PIT 54 protein [Source:RefSeq peptide;Acc:NP_997063] [ENSGALT00000014844]		CN219232	2.55677	0.0137394	Target: CN219232; Description: CN219232 WLA002H06.ab1 WLbrain Gallus gallus cDNA 5', mRNA sequence; Next best Hit: A_87_P014972(alignment length 14bp with 100.00%identity)
	CO763398	2.36832	0.00203302	Target: CO763398; Description: CO763398 brain_EST06590 Brain cDNA Library Gallus gallus cDNA 5', mRNA sequence; Next best Hit: CO762187(alignment length 60bp with 98.33%identity)	ens|ENSGALT00000013227|gb|XM_413937|tc|TC384252	UACA	1.85368	0.0137582	uveal autoantigen with coiled-coil domains and ankyrin repeats [Source:HGNC Symbol;Acc:15947] [ENSGALT00000013227]
gb|CR407423	CR407423	4.05002	0.00204535	Gallus gallus finished cDNA, clone ChEST710j17. [CR407423]	gb|CR406126|tc|TC412332	CR406126	2.01325	0.0137824	Gallus gallus finished cDNA, clone ChEST612j19. [CR406126]
gb|BX935754|gb|BX931058	BX935754	1.27405	0.00205325	Gallus gallus finished cDNA, clone ChEST36h21. [BX935754]	ens|ENSGALT00000019376|gb|XM_418801|tc|TC378384	LARS2	1.1796	0.0137828	Uncharacterized protein [Source:UniProtKB/TrEMBL;Acc:E1BXI7] [ENSGALT00000019376]
	GT_EA606_A_87_P324657	1.65198	0.00205909	Unknown		CN218487	2.88027	0.0138626	Target: CN218487; Description: CN218487 RJA031B06.ab1 RJbrain Gallus gallus cDNA 5', mRNA sequence; Next best Hit: A_87_P261343(alignment length 15bp with 100.00%identity)
ens|ENSGALT00000035430|gb|BU357331|tc|TC406244|ref|XM_418187	PRAM1	1.79466	0.00206136	PML-RARA regulated adaptor molecule 1 [Source:HGNC Symbol;Acc:30091] [ENSGALT00000035430]	ens|ENSGALT00000003455|gb|BX933308|tc|TC439844|tc|TC384523	SNX22	1.65007	0.0138753	sorting nexin 22 [Source:HGNC Symbol;Acc:16315] [ENSGALT00000003455]
	W66509	2.65809	0.00206157	Target: W66509; Description: W66509 EST067 chicken liver cDNA library, Stratagene (cat.#935402) Gallus gallus cDNA clone CLEST031 similar to Chicken mitochondrial genome, mRNA sequence; Next best Hit: CN217319(alignment length 15bp with 100.00%identity)	tc|TC381921|ref|XM_417561	TC381921	2.71922	0.0139412	Rep: Protein kinase C zeta type (EC 2.7.11.13) (nPKC-zeta). - Gallus gallus, complete [TC381921]
	CO759350	1.85094	0.00208134	Target: CO759350; Description: CO759350 brain_EST02542 Brain cDNA Library Gallus gallus cDNA 5', mRNA sequence; Next best Hit: CO762468(alignment length 57bp with 100.00%identity)		CO759023	2.13236	0.0139916	Target: CO759023; Description: CO759023 brain_EST02215 Brain cDNA Library Gallus gallus cDNA 5', mRNA sequence; Next best Hit: CN234932(alignment length 60bp with 95.00%identity)
gb|XM_001231585|tc|TC382868	KRT4	2.66315	0.0021017	PREDICTED: Gallus gallus hypothetical protein LOC768882 (LOC768882), mRNA [XM_001231585]		CN725513	4.29748	0.0140572	Target: CN725513; Description: CN725513 ROS_liv07 Chicken 7 weeks liver cDNA library Gallus gallus cDNA, mRNA sequence; Next best Hit: CN221877(alignment length 14bp with 100.00%identity)
ens|ENSGALT00000012612|ens|ENSGALT00000005700|ens|ENSGALT00000039713|gb|BX932540	ENSGALT00000012612	1.4686	0.00212029	RPGRIP1-like [Source:HGNC Symbol;Acc:29168] [ENSGALT00000012612]		CN222200	1.18561	0.0141538	Target: CN222200; Description: CN222200 WLA039E08.ab1 WLbrain Gallus gallus cDNA 5', mRNA sequence; Next best Hit: CN234152(alignment length 60bp with 100.00%identity)
gb|CR352774	CR352774	2.8334	0.00214355	Gallus gallus finished cDNA, clone ChEST436g15. [CR352774]	tc|NP9677530	NP9677530	1.65558	0.0142293	GB
ens|ENSGALT00000030935|ens|ENSGALT00000023912|ens|ENSGALT00000036873|gb|BX950644	SMCHD1	1.77241	0.00214805	structural maintenance of chromosomes flexible hinge domain containing 1 [Source:HGNC Symbol;Acc:29090] [ENSGALT00000030935]	gb|BX933042|gb|BX935757|gb|BX932895	BX933042	1.10122	0.0143716	Gallus gallus finished cDNA, clone ChEST1009n14. [BX933042]
ens|ENSGALT00000005813|gb|XM_415676|tc|TC381662|tc|TC394999	PITPNC1	1.05284	0.00218075	phosphatidylinositol transfer protein, cytoplasmic 1 [Source:HGNC Symbol;Acc:21045] [ENSGALT00000005813]		CN221301	1.31067	0.0144168	Target: CN221301; Description: CN221301 RJA075C01.ab1 RJbrain Gallus gallus cDNA 5', mRNA sequence; Next best Hit: CN222515(alignment length 57bp with 91.23%identity)
ref|NM_001199407|gb|CR385235|tc|TC412240|tc|TC409561	TCP11L1	1.59207	0.00218284	Gallus gallus t-complex 11 (mouse)-like 1 (TCP11L1), mRNA [NM_001199407]		CO762572	1.59374	0.0144406	Target: CO762572; Description: CO762572 brain_EST05764 Brain cDNA Library Gallus gallus cDNA 5', mRNA sequence; Next best Hit: CN217539(alignment length 14bp with 100.00%identity)
ens|ENSGALT00000013991|tc|TC416483|tc|TC408184|ref|XM_001231725	LOC771098	1.79637	0.00219641	Rep: PREDICTED: glutaryl-Coenzyme A dehydrogenase isoform 3 - Macaca mulatta, partial (89%) [TC416483]	ref|NM_001030703|ens|ENSGALT00000002784|gb|CR524342|gb|AJ719379	JMJD6	2.16543	0.0144704	Gallus gallus jumonji domain containing 6 (JMJD6), mRNA [NM_001030703]
	CO759479	2.39734	0.00222198	Target: CO759479; Description: CO759479 brain_EST02671 Brain cDNA Library Gallus gallus cDNA 5', mRNA sequence; Next best Hit: CO763830(alignment length 60bp with 100.00%identity)		CN220562	3.13795	0.0148367	Target: CN220562; Description: CN220562 RJA066H08.ab1 RJbrain Gallus gallus cDNA 5', mRNA sequence; Next best Hit: CN223675(alignment length 26bp with 92.31%identity)
	CN220809	1.46593	0.00223007	Target: CN220809; Description: CN220809 RJA069G11.ab1 RJbrain Gallus gallus cDNA 5', mRNA sequence; Next best Hit: CN219112(alignment length 60bp with 98.33%identity)	ref|NM_204969|ens|ENSGALT00000026970|gb|U34278|tc|TC419360	PLA2G7	2.21158	0.0148654	Gallus gallus phospholipase A2, group VII (platelet-activating factor acetylhydrolase, plasma) (PLA2G7), mRNA [NM_204969]
ens|ENSGALT00000009484|gb|BX936104|gb|CR523508|gb|XM_413830	ENSGALT00000009484	1.42605	0.00223347	Ubiquitin carboxyl-terminal hydrolase [Source:UniProtKB/TrEMBL;Acc:E1C0G5] [ENSGALT00000009484]		CN220977	1.42418	0.0148865	Target: CN220977; Description: CN220977 WLA028E09.ab1 WLbrain Gallus gallus cDNA 5', mRNA sequence; Next best Hit: CN217296(alignment length 14bp with 100.00%identity)
	CN219230	2.15883	0.00223541	Target: CN219230; Description: CN219230 WLA002H03.ab1 WLbrain Gallus gallus cDNA 5', mRNA sequence; Next best Hit: CN235672(alignment length 60bp with 100.00%identity)	ens|ENSGALT00000009667	HOMER2	3.24716	0.0148893	homer homolog 2 (Drosophila) [Source:HGNC Symbol;Acc:17513] [ENSGALT00000009667]
ref|NM_001030387|gb|CR391764|gb|X67778|gb|CR389195	ARIH1	2.66663	0.00224546	Gallus gallus ariadne homolog, ubiquitin-conjugating enzyme E2 binding protein, 1 (Drosophila) (ARIH1), mRNA [NM_001030387]		CO760363	1.52232	0.0149115	Target: CO760363; Description: CO760363 brain_EST03555 Brain cDNA Library Gallus gallus cDNA 5', mRNA sequence; Next best Hit: CO760383(alignment length 60bp with 100.00%identity)
ens|ENSGALT00000040827|tc|TC417134	ENSGALT00000040827	1.53819	0.00225955	Uncharacterized protein [Source:UniProtKB/TrEMBL;Acc:E1C6K4] [ENSGALT00000040827]	gb|CR524080|tc|TC397372	CR524080	2.91036	0.0149177	Gallus gallus finished cDNA, clone ChEST1015a13. [CR524080]
ens|ENSGALT00000038643|gb|DR410904|tc|TC409366|tc|TC392396	ENSGALT00000038643	2.23357	0.00226918	zinc finger, RAN-binding domain containing 1 [Source:HGNC Symbol;Acc:18224] [ENSGALT00000038643]	gb|BX934571	BX934571	4.99773	0.0149739	Gallus gallus finished cDNA, clone ChEST88e13. [BX934571]
ens|ENSGALT00000040044	ENSGALT00000040044	1.45664	0.00228014	Uncharacterized protein [Source:UniProtKB/TrEMBL;Acc:F1NZG8] [ENSGALT00000040044]		CN217390	1.93439	0.0149961	Target: CN217390; Description: CN217390 RJA010F06.ab1 RJbrain Gallus gallus cDNA 5', mRNA sequence; Next best Hit: CN218771(alignment length 58bp with 100.00%identity)
ens|ENSGALT00000002080|gb|XM_415739|tc|TC381964|tc|TC422886	MYBBP1A	1.53449	0.0023009	MYB binding protein (P160) 1a [Source:HGNC Symbol;Acc:7546] [ENSGALT00000002080]	ens|ENSGALT00000002971|ref|XM_424983	DNAJB5	2.10747	0.0150484	DnaJ (Hsp40) homolog, subfamily B, member 5 [Source:HGNC Symbol;Acc:14887] [ENSGALT00000002971]
ref|NM_204921|gb|Y12011|tc|TC375669	CD5	2.18899	0.00230616	Gallus gallus CD5 molecule (CD5), mRNA [NM_204921]		CO761844	1.1301	0.0151631	Target: CO761844; Description: CO761844 brain_EST05036 Brain cDNA Library Gallus gallus cDNA 5', mRNA sequence; Next best Hit: CO761849(alignment length 16bp with 100.00%identity)
ref|NM_204615|ens|ENSGALT00000009627|gb|U92545|tc|NP9670441	TULP1	2.18098	0.00230865	Gallus gallus tubby like protein 1 (TULP1), mRNA [NM_204615]	ens|ENSGALT00000025725|gb|BX932052|gb|BX950279|gb|BX930003	C3H6orf57	2.33716	0.0152389	chromosome 6 open reading frame 57 [Source:HGNC Symbol;Acc:20957] [ENSGALT00000025725]
ens|ENSGALT00000038870|ens|ENSGALT00000038869|gb|BX933773|tc|TC405925	ENSGALT00000038870	1.99531	0.00231344	Uncharacterized protein [Source:UniProtKB/TrEMBL;Acc:E1BXV9] [ENSGALT00000038870]	gb|XM_001232430|tc|TC384819	PIK3R6	2.26382	0.0152526	PREDICTED: Gallus gallus similar to p87 phosphoinositide 3-kinase gamma adapter protein (LOC769202), mRNA [XM_001232430]
ens|ENSGALT00000005325|gb|BU379061|tc|TC421304|ref|XM_003642831	ENSGALT00000005325	1.18563	0.00231459	DEXH (Asp-Glu-X-His) box polypeptide 58 [Source:HGNC Symbol;Acc:29517] [ENSGALT00000005325]	tc|NP9678143	NP9678143	1.252	0.0152718	GB
	CN223164	2.54832	0.00233289	Target: CN223164; Description: CN223164 RJA091D12.ab1 RJbrain Gallus gallus cDNA 5', mRNA sequence; Next best Hit: CN220022(alignment length 60bp with 96.67%identity)		CN222013	1.89089	0.0153014	Target: CN222013; Description: CN222013 RJA081F02.ab1 RJbrain Gallus gallus cDNA 5', mRNA sequence; Next best Hit: CO760684(alignment length 18bp with 94.44%identity)
ref|NM_204915|ens|ENSGALT00000007180|gb|BX935040|gb|AF031484	EYA2	3.2702	0.00235112	Gallus gallus eyes absent homolog 2 (Drosophila) (EYA2), mRNA [NM_204915]	ref|NM_205382|ens|ENSGALT00000019503|ens|ENSGALT00000030609|ens|ENSGALT00000037963	TEF	1.40167	0.0153144	Gallus gallus thyrotrophic embryonic factor (TEF), mRNA [NM_205382]
	CN222334	2.02664	0.00235302	Target: CN222334; Description: CN222334 RJA085A11.ab1 RJbrain Gallus gallus cDNA 5', mRNA sequence; Next best Hit: CN216829(alignment length 60bp with 96.67%identity)	ref|NM_205303|ens|ENSGALT00000016557|gb|FJ232589|gb|EF507731	CAPN1	1.17868	0.0154514	Gallus gallus calpain 1, (mu/I) large subunit (CAPN1), mRNA [NM_205303]
ens|ENSGALT00000017902|ref|XM_416124	SLC6A15	1.51271	0.00235708	Transporter [Source:UniProtKB/TrEMBL;Acc:E1BS25] [ENSGALT00000017902]		CO760081	1.52077	0.015552	Target: CO760081; Description: CO760081 brain_EST03273 Brain cDNA Library Gallus gallus cDNA 5', mRNA sequence; Next best Hit: CO761017(alignment length 60bp with 100.00%identity)
tc|NP9676449	NP9676449	3.21095	0.00235738	GB	ref|NM_001030894|ens|ENSGALT00000041133|ens|ENSGALT00000001463|gb|CR389031	TAF12	1.29591	0.0155638	Gallus gallus TAF12 RNA polymerase II, TATA box binding protein (TBP)-associated factor, 20kDa (TAF12), mRNA [NM_001030894]
ens|ENSGALT00000005967|gb|XM_413763|tc|TC381427	RORA	1.93007	0.00237172	Uncharacterized protein [Source:UniProtKB/TrEMBL;Acc:F1NML9] [ENSGALT00000005967]	ens|ENSGALT00000003856|gb|BX933834|tc|TC420817|tc|TC378391	CTNNA1	1.05483	0.0156582	catenin (cadherin-associated protein), alpha 1, 102kDa [Source:HGNC Symbol;Acc:2509] [ENSGALT00000003856]
ref|NM_001006463|ens|ENSGALT00000037133|ens|ENSGALT00000025496|gb|CR385784	RMND5A	1.33172	0.00237965	Gallus gallus required for meiotic nuclear division 5 homolog A (S. cerevisiae) (RMND5A), mRNA [NM_001006463]	ens|ENSGALT00000035513	ENSGALT00000035513	2.13625	0.0156685	Unknown
	CN219722	2.71527	0.00238515	Target: CN219722; Description: CN219722 WLA009C02.ab1 WLbrain Gallus gallus cDNA 5', mRNA sequence; Next best Hit: CN220492(alignment length 19bp with 100.00%identity)	gb|XM_419569|tc|TC380604|ref|XM_001231253	XM_419569	1.53628	0.0157445	PREDICTED: Gallus gallus similar to Chain A, Crystal Structure Of Hif Prolyl Hydroxylase Egln-1 In Complex With A Biologically Active Inhibitor (LOC421528), mRNA [XM_419569]
ens|ENSGALT00000000355|gb|XM_417676|tc|TC398343	ENSGALT00000000355	1.65463	0.00240421	cell division cycle associated 2 [Source:HGNC Symbol;Acc:14623] [ENSGALT00000000355]	ens|ENSGALT00000003332|gb|BX950408	ENSGALT00000003332	2.60769	0.0157678	Kv channel interacting protein 1 [Source:HGNC Symbol;Acc:15521] [ENSGALT00000003332]
gb|CR390245	CR390245	3.02554	0.00243029	Gallus gallus finished cDNA, clone ChEST927n19. [CR390245]	ref|NM_204934|ens|ENSGALT00000002199|ens|ENSGALT00000038839|gb|AF042795	GSN	1.55168	0.0157975	Gallus gallus gelsolin (GSN), mRNA [NM_204934]
	CN219112	1.46908	0.00244007	Target: CN219112; Description: CN219112 RJA049B04.ab1 RJbrain Gallus gallus cDNA 5', mRNA sequence; Next best Hit: CN221473(alignment length 60bp with 100.00%identity)		CN222234	1.74517	0.0158846	Target: CN222234; Description: CN222234 RJA083E07.ab1 RJbrain Gallus gallus cDNA 5', mRNA sequence; Next best Hit: CN222236(alignment length 60bp with 98.33%identity)
ens|ENSGALT00000010348|gb|BX930922|gb|BX931656|gb|AJ720151	HTATSF1	1.79282	0.00244069	HIV-1 Tat specific factor 1 [Source:HGNC Symbol;Acc:5276] [ENSGALT00000010348]		CN223949	1.26498	0.0159811	Target: CN223949; Description: CN223949 WLA052D03.ab1 WLbrain Gallus gallus cDNA 5', mRNA sequence; Next best Hit: CN219371(alignment length 23bp with 100.00%identity)
ens|ENSGALT00000013991|tc|TC408184|ref|XM_001231725	LOC771098	1.34911	0.00244487	Rep: PREDICTED: glutaryl-Coenzyme A dehydrogenase isoform 3 - Macaca mulatta, partial (88%) [TC408184]		CO761172	3.17262	0.0159915	Target: CO761172; Description: CO761172 brain_EST04364 Brain cDNA Library Gallus gallus cDNA 5', mRNA sequence; Next best Hit: CN218453(alignment length 14bp with 100.00%identity)
	CO761020	1.6291	0.00245511	Target: CO761020; Description: CO761020 brain_EST04212 Brain cDNA Library Gallus gallus cDNA 5', mRNA sequence; Next best Hit: CO762564(alignment length 60bp with 100.00%identity)	gb|CR390475|gb|BU223701|tc|TC405093	CR390475	1.56465	0.0159945	Gallus gallus finished cDNA, clone ChEST445a10. [CR390475]
	CN234052	1.95199	0.00246204	Target: CN234052; Description: CN234052 WLA085E11.ab1 WLbrain Gallus gallus cDNA 5', mRNA sequence; Next best Hit: A_87_P064841(alignment length 18bp with 94.44%identity)	gb|CR353062	ACAD9	3.05905	0.0159963	Gallus gallus finished cDNA, clone ChEST411k13. [CR353062]
ref|NM_204594|ens|ENSGALT00000003264|gb|AY053465|tc|TC376095	NR2E3	2.84331	0.00248155	Gallus gallus nuclear receptor subfamily 2, group E, member 3 (NR2E3), mRNA [NM_204594]		CO764270	4.44611	0.0160437	Target: CO764270; Description: CO764270 brain_EST07462 Brain cDNA Library Gallus gallus cDNA 5', mRNA sequence; Next best Hit: A_87_P215028(alignment length 18bp with 94.44%identity)
	CN217836	3.68327	0.00248215	Target: CN217836; Description: CN217836 RJA020A02.ab1 RJbrain Gallus gallus cDNA 5', mRNA sequence; Next best Hit: CN224377(alignment length 15bp with 100.00%identity)	ens|ENSGALT00000025528|gb|XM_419855|tc|TC399998	NT5E	1.19355	0.0160631	Uncharacterized protein [Source:UniProtKB/TrEMBL;Acc:F1NZT4] [ENSGALT00000025528]
ens|ENSGALT00000034452|ens|ENSGALT00000034451|gb|BU418943|tc|TC395811	TP53TG5	3.02801	0.00250103	TP53 target 5 [Source:HGNC Symbol;Acc:15856] [ENSGALT00000034452]	gb|XM_418800|tc|TC377981	LIMD1	1.82938	0.0161089	PREDICTED: Gallus gallus LIM domains containing 1 (LIMD1), mRNA [XM_418800]
	CO763403	1.67493	0.0025029	Target: CO763403; Description: CO763403 brain_EST06595 Brain cDNA Library Gallus gallus cDNA 5', mRNA sequence; Next best Hit: CO763660(alignment length 60bp with 100.00%identity)	gb|BX929755	BX929755	3.79818	0.0161909	Gallus gallus finished cDNA, clone ChEST552k7. [BX929755]
ens|ENSGALT00000008386|gb|CR523684|gb|XR_027103|tc|NP9675184	ENSGALT00000008386	1.71003	0.0025078	Uncharacterized protein [Source:UniProtKB/TrEMBL;Acc:E1BUA0] [ENSGALT00000008386]	gb|CR354148|ref|XM_003642084	CR354148	3.37324	0.0162537	Gallus gallus finished cDNA, clone ChEST386j7. [CR354148]
ens|ENSGALT00000020890|gb|BX950400|gb|BX934065|tc|TC380904	FARS2	1.28563	0.00251797	phenylalanyl-tRNA synthetase 2, mitochondrial [Source:HGNC Symbol;Acc:21062] [ENSGALT00000020890]		CO760400	1.75966	0.0162961	Target: CO760400; Description: CO760400 brain_EST03592 Brain cDNA Library Gallus gallus cDNA 5', mRNA sequence; Next best Hit: A_87_P013158(alignment length 16bp with 100.00%identity)
ref|NM_001044685|gb|AB199734|tc|TC375926|tc|TC423720	SIX1	1.85911	0.00252012	Gallus gallus SIX homeobox 1 (SIX1), mRNA [NM_001044685]	ref|NM_001135679|ens|ENSGALT00000007629|tc|TC381870	SLC47A2	1.78763	0.0163001	Gallus gallus solute carrier family 47, member 2 (SLC47A2), mRNA [NM_001135679]
	CO759293	1.74239	0.00253769	Target: CO759293; Description: CO759293 brain_EST02485 Brain cDNA Library Gallus gallus cDNA 5', mRNA sequence; Next best Hit: CO761447(alignment length 60bp with 98.33%identity)	ens|ENSGALT00000023326|ens|ENSGALT00000037120|gb|CR405971|gb|BX930978	NOP2	1.36127	0.0163765	NOP2 nucleolar protein homolog (yeast) [Source:HGNC Symbol;Acc:7867] [ENSGALT00000023326]
	CN218305	1.87285	0.002571	Target: CN218305; Description: CN218305 RJA028B11.ab1 RJbrain Gallus gallus cDNA 5', mRNA sequence; Next best Hit: CN216829(alignment length 61bp with 98.36%identity)	gb|BX930393	BX930393	1.38133	0.016534	Gallus gallus finished cDNA, clone ChEST596p17. [BX930393]
ref|NM_001031080|ens|ENSGALT00000037221|ens|ENSGALT00000024970|gb|AJ719591	PNISR	1.51771	0.0025718	Gallus gallus PNN-interacting serine/arginine-rich protein (PNISR), mRNA [NM_001031080]	gb|DR419542|tc|TC433436|tc|TC421614|tc|TC383675	DR419542	1.1823	0.0167439	gPGC_EST09384 Embryonic gonadal PGC cDNA Library Gallus gallus cDNA 5', mRNA sequence [DR419542]
gb|CR406970|gb|CR406141|gb|BU322929|tc|TC396406	CR406970	3.12454	0.00258604	Gallus gallus finished cDNA, clone ChEST912o13. [CR406970]	gb|CR390303|gb|BU420101	CR390303	1.25499	0.0168157	Gallus gallus finished cDNA, clone ChEST225a8. [CR390303]
tc|TC443504	TC443504	1.5806	0.00259396	Unknown	ens|ENSGALT00000002657|tc|TC383936	CDK12	1.40719	0.0168395	cyclin-dependent kinase 12 [Source:HGNC Symbol;Acc:24224] [ENSGALT00000002657]
gb|CR391579	CR391579	1.70679	0.0025958	Gallus gallus finished cDNA, clone ChEST802h3. [CR391579]	ens|ENSGALT00000018500|gb|CR352667|tc|TC384628|ref|XM_420576	TECRL	5.10865	0.016945	trans-2,3-enoyl-CoA reductase-like [Source:HGNC Symbol;Acc:27365] [ENSGALT00000018500]
gb|XM_415250|tc|TC379746	PRR14L	1.29391	0.00260684	PREDICTED: Gallus gallus similar to EMO2 (LOC416957), mRNA [XM_415250]	ref|NM_204177|ens|ENSGALT00000021652|gb|BX929571|gb|AF218799	LDHB	3.0627	0.0169518	Gallus gallus lactate dehydrogenase B (LDHB), mRNA [NM_204177]
ens|ENSGALT00000026039|tc|TC416731|ref|XM_003640860	ENSGALT00000026039	2.26635	0.00260977	brain-specific angiogenesis inhibitor 1 [Source:HGNC Symbol;Acc:943] [ENSGALT00000026039]	ens|ENSGALT00000012192|tc|TC407543|ref|XM_421709	ANKRD2	4.83908	0.0169843	ankyrin repeat domain 2 (stretch responsive muscle) [Source:HGNC Symbol;Acc:495] [ENSGALT00000012192]
ref|NM_001199643|ens|ENSGALT00000013070	SYT13	1.49317	0.0026239	Gallus gallus synaptotagmin XIII (SYT13), mRNA [NM_001199643]	ref|NM_001012947|gb|AJ719315|tc|TC373813	XPO4	1.17182	0.0170022	Gallus gallus exportin 4 (XPO4), mRNA [NM_001012947]
ens|ENSGALT00000008713|gb|XM_001232518|tc|TC381332|tc|TC442365	OGT	1.15457	0.00263896	O-linked N-acetylglucosamine (GlcNAc) transferase (UDP-N-acetylglucosamine:polypeptide-N-acetylglucosaminyl transferase) [Source:HGNC Symbol;Acc:8127] [ENSGALT00000008713]		CO761487	1.91443	0.017057	Target: CO761487; Description: CO761487 brain_EST04679 Brain cDNA Library Gallus gallus cDNA 5', mRNA sequence; Next best Hit: CO759784(alignment length 16bp with 100.00%identity)
ens|ENSGALT00000029093|tc|TC421387|tc|TC407164|tc|TC408492	COX1	2.77391	0.00264432	cytochrome c oxidase subunit I [Source:RefSeq peptide;Acc:NP_006917] [ENSGALT00000029093]		CD214351	2.36766	0.0171558	Target: CD214351; Description: CD214351 pgl1n.pk008.c3 Normalized chicken liver cDNA library (pgl1n) Gallus gallus cDNA clone pgl1n.pk008.c3 ; Next best Hit: CN222859(alignment length 17bp with 100.00%identity)
ens|ENSGALT00000023534|gb|XM_424260|tc|TC432972|tc|TC435513	FNBP4	2.0206	0.00264574	formin binding protein 4 [Source:HGNC Symbol;Acc:19752] [ENSGALT00000023534]	ens|ENSGALT00000020285|gb|BU421611|gb|XM_419672|tc|TC393862	MTHFD1L	1.88535	0.0172272	Uncharacterized protein [Source:UniProtKB/TrEMBL;Acc:F1NCS6] [ENSGALT00000020285]
ref|NM_001001762|gb|CR386433|gb|AY357253|tc|TC431268	B-LA	2.48348	0.00264891	Gallus gallus MHC class II antigen alpha (B-LA), mRNA [NM_001001762]		CN725534	1.52152	0.0172396	Target: CN725534; Description: CN725534 ROS_liv36 Chicken 7 weeks liver cDNA library Gallus gallus cDNA, mRNA sequence; Next best Hit: CN218367(alignment length 14bp with 100.00%identity)
ens|ENSGALT00000023264	ENSGALT00000023264	1.53454	0.00265945	trafficking protein particle complex 10 [Source:HGNC Symbol;Acc:11868] [ENSGALT00000023264]	ref|NM_001030385|ens|ENSGALT00000002043|gb|AJ719662|tc|TC412250	EDC3	2.03488	0.0173388	Gallus gallus enhancer of mRNA decapping 3 homolog (S. cerevisiae) (EDC3), mRNA [NM_001030385]
ref|NM_205375|gb|CR386689|gb|M87337|gb|X64295	TCF12	2.49914	0.00267238	Gallus gallus transcription factor 12 (TCF12), mRNA [NM_205375]		CN217583	2.21918	0.0173946	Target: CN217583; Description: CN217583 RJA015A09.ab1 RJbrain Gallus gallus cDNA 5', mRNA sequence; Next best Hit: CN217584(alignment length 60bp with 100.00%identity)
gb|XM_421201|tc|TC381568	LOC423282	2.19287	0.00267733	PREDICTED: Gallus gallus hypothetical LOC423282 (LOC423282), mRNA [XM_421201]	ref|NM_001031351|ens|ENSGALT00000021262|ens|ENSGALT00000006694|gb|AJ719974	TRMU	1.5715	0.0175224	Gallus gallus tRNA 5-methylaminomethyl-2-thiouridylate methyltransferase (TRMU), nuclear gene encoding mitochondrial protein, mRNA [NM_001031351]
ref|NM_001162405|gb|CR353716|gb|FJ883174|tc|TC421155	GPER	2.63543	0.00268217	Gallus gallus G protein-coupled estrogen receptor 1 (GPER), mRNA [NM_001162405]	ens|ENSGALT00000029662|gb|BX933214|gb|XM_423951|tc|TC417561	ENSGALT00000029662	1.47702	0.0176286	Uncharacterized protein [Source:UniProtKB/TrEMBL;Acc:F1NNM5] [ENSGALT00000029662]
	CO760386	1.70142	0.0026834	Target: CO760386; Description: CO760386 brain_EST03578 Brain cDNA Library Gallus gallus cDNA 5', mRNA sequence; Next best Hit: CO761668(alignment length 55bp with 92.73%identity)	ref|NM_205515|ens|ENSGALT00000002351|ens|ENSGALT00000040182|ens|ENSGALT00000040190	CAPZA1	1.137	0.0176783	Gallus gallus capping protein (actin filament) muscle Z-line, alpha 1 (CAPZA1), mRNA [NM_205515]
gb|CR388521	CR388521	3.92148	0.00270538	Gallus gallus finished cDNA, clone ChEST1027f3. [CR388521]		CO761740	2.27166	0.017819	Target: CO761740; Description: CO761740 brain_EST04932 Brain cDNA Library Gallus gallus cDNA 5', mRNA sequence; Next best Hit: CN217583(alignment length 57bp with 89.47%identity)
	CN221599	2.80129	0.00271423	Target: CN221599; Description: CN221599 RJA077H09.ab1 RJbrain Gallus gallus cDNA 5', mRNA sequence; Next best Hit: CN224277(alignment length 15bp with 100.00%identity)	gb|CV856945|tc|TC377083|tc|TC391135	CV856945	1.77718	0.0178731	gonad_EST04421 Embryonic gonad cDNA Library Gallus gallus cDNA 5', mRNA sequence [CV856945]
	W66585	4.831	0.00272333	Target: W66585; Description: W66585 EST049 chicken liver cDNA library, Stratagene (cat.#935402) Gallus gallus cDNA clone CLEST039 similar to Duck lactate dehydrogenase B-4 (Ldh-B)/epsilon crystallin, mRNA sequence; Next best Hit: CO759670(alignment length		CN217748	1.15222	0.0179467	Target: CN217748; Description: CN217748 RJA017E04.ab1 RJbrain Gallus gallus cDNA 5', mRNA sequence; Next best Hit: A_87_P017948(alignment length 14bp with 100.00%identity)
	CO759089	1.84463	0.00273027	Target: CO759089; Description: CO759089 brain_EST02281 Brain cDNA Library Gallus gallus cDNA 5', mRNA sequence; Next best Hit: CO759293(alignment length 60bp with 100.00%identity)	gb|CF250019|tc|TC382636	CF250019	1.87754	0.0180511	esa007_d11 Eimeiria tenella-infected caecal tonsil Gallus gallus cDNA, mRNA sequence [CF250019]
ens|ENSGALT00000030387|gb|CR352636|gb|CR387321|gb|CR352642	ENSGALT00000030387	1.91343	0.00273044	Uncharacterized protein [Source:UniProtKB/TrEMBL;Acc:E1C4S0] [ENSGALT00000030387]		CN221003	1.95584	0.0180642	Target: CN221003; Description: CN221003 WLA029A08.ab1 WLbrain Gallus gallus cDNA 5', mRNA sequence; Next best Hit: CN222140(alignment length 16bp with 100.00%identity)
ens|ENSGALT00000019185|gb|BX950497|gb|BX933140	WBP11	1.76277	0.00273613	WW domain binding protein 11 [Source:HGNC Symbol;Acc:16461] [ENSGALT00000019185]	ref|NM_001031477|ens|ENSGALT00000040251|gb|CR353207|gb|AJ851534	YWHAG	1.58183	0.0180747	Gallus gallus tyrosine 3-monooxygenase/tryptophan 5-monooxygenase activation protein, gamma polypeptide (YWHAG), mRNA [NM_001031477]
gb|CR385371	CSTF1	2.48816	0.00274755	Gallus gallus finished cDNA, clone ChEST600e4. [CR385371]		CO759860	2.00106	0.0181226	Target: CO759860; Description: CO759860 brain_EST03052 Brain cDNA Library Gallus gallus cDNA 5', mRNA sequence; Next best Hit: CO760675(alignment length 60bp with 100.00%identity)
ens|ENSGALT00000040530	ENSGALT00000040530	1.09044	0.00275387	Uncharacterized protein [Source:UniProtKB/TrEMBL;Acc:F1NYL8] [ENSGALT00000040530]	ens|ENSGALT00000039071	ENSGALT00000039071	1.36612	0.0181629	Uncharacterized protein [Source:UniProtKB/TrEMBL;Acc:E1BSX4] [ENSGALT00000039071]
ens|ENSGALT00000013068|gb|CR382429|gb|XM_413932|tc|TC438773	ENSGALT00000013068	1.69977	0.00275423	Uncharacterized protein [Source:UniProtKB/TrEMBL;Acc:E1C2A1] [ENSGALT00000013068]		CN725536	1.73157	0.0182489	Target: CN725536; Description: CN725536 ROS_liv38 Chicken 7 weeks liver cDNA library Gallus gallus cDNA, mRNA sequence; Next best Hit: CN225976(alignment length 15bp with 100.00%identity)
ens|ENSGALT00000034089	TMEM2	1.03355	0.00276173	Uncharacterized protein [Source:UniProtKB/TrEMBL;Acc:F1NPJ6] [ENSGALT00000034089]	ens|ENSGALT00000004181|gb|BX929921|tc|TC425720|tc|TC436406	UBTD1	1.38528	0.0182614	ubiquitin domain containing 1 [Source:HGNC Symbol;Acc:25683] [ENSGALT00000004181]
	CN221583	2.39491	0.0027662	Target: CN221583; Description: CN221583 WLA032H09.ab1 WLbrain Gallus gallus cDNA 5', mRNA sequence; Next best Hit: CN236169(alignment length 60bp with 100.00%identity)	ens|ENSGALT00000005377|gb|AY466165|gb|BX930791|gb|BX935867	AIMP2	1.15964	0.0183384	aminoacyl tRNA synthetase complex-interacting multifunctional protein 2 [Source:HGNC Symbol;Acc:20609] [ENSGALT00000005377]
	CN220863	1.56785	0.00277552	Target: CN220863; Description: CN220863 WLA025A04.ab1 WLbrain Gallus gallus cDNA 5', mRNA sequence; Next best Hit: A_87_P129493(alignment length 15bp with 100.00%identity)		CN222757	1.72027	0.0183795	Target: CN222757; Description: CN222757 RJA088H04.ab1 RJbrain Gallus gallus cDNA 5', mRNA sequence; Next best Hit: CN223640(alignment length 21bp with 100.00%identity)
gb|CR389289	CR389289	2.13845	0.00278612	Gallus gallus finished cDNA, clone ChEST114h1. [CR389289]		CN225955	1.41084	0.0185838	Target: CN225955; Description: CN225955 WLA081G12.ab1 WLbrain Gallus gallus cDNA 5', mRNA sequence; Next best Hit: A_87_P012127(alignment length 37bp with 100.00%identity)
ens|ENSGALT00000022607|gb|CR390148|gb|XR_027056|tc|TC404010	ENSGALT00000022607	2.19346	0.00278836	Abelson helper integration site 1 [Source:HGNC Symbol;Acc:21575] [ENSGALT00000022607]	ens|ENSGALT00000012748	ENSGALT00000012748	3.34018	0.0188757	chromosome 10 open reading frame 67 [Source:HGNC Symbol;Acc:28716] [ENSGALT00000012748]
gb|BX936119	TMCC1	1.63568	0.00279237	Gallus gallus finished cDNA, clone ChEST485c12. [BX936119]	tc|TC395084	TC395084	1.44476	0.0189	Rep: Cleavage stimulation factor, 3' pre-RNA, subunit 3, 77kDa - Homo sapiens (Human), partial (70%) [TC395084]
	CN222048	2.32749	0.00279781	Target: CN222048; Description: CN222048 WLA037A10.ab1 WLbrain Gallus gallus cDNA 5', mRNA sequence; Next best Hit: CN220181(alignment length 18bp with 100.00%identity)		CN220423	3.74226	0.0190516	Target: CN220423; Description: CN220423 WLA015H05.ab1 WLbrain Gallus gallus cDNA 5', mRNA sequence; Next best Hit: A_87_P112773(alignment length 30bp with 100.00%identity)
ref|NM_001110438|ens|ENSGALT00000015953|gb|EU124684|tc|TC376686	AVPR1A	1.23766	0.00283307	Gallus gallus arginine vasopressin receptor 1A (AVPR1A), mRNA [NM_001110438]		BG641811	2.47725	0.0190895	Target: BG641811; Description: BG641811 pgl1c.pk002.c4 Chicken liver cDNA library Gallus gallus cDNA clone pgl1c.pk002.c4 ; Next best Hit: A_87_P023576(alignment length 19bp with 100.00%identity)
gb|BX934724	TMEM35	1.49553	0.00283419	Gallus gallus finished cDNA, clone ChEST116p4. [BX934724]	ens|ENSGALT00000020873|gb|BX950640|gb|XM_416335|tc|TC426028	HIPK2	1.85466	0.0191631	Uncharacterized protein [Source:UniProtKB/TrEMBL;Acc:F1P4G3] [ENSGALT00000020873]
	CN225053	3.33861	0.00283494	Target: CN225053; Description: CN225053 WLA066C06.ab1 WLbrain Gallus gallus cDNA 5', mRNA sequence; Next best Hit: CN225665(alignment length 15bp with 100.00%identity)	tc|NP9675742	NP9675742	2.88135	0.019185	GB
ens|ENSGALT00000011168|gb|XM_420077|tc|TC391474	AZI1	1.33057	0.00284117	5-azacytidine induced 1 [Source:HGNC Symbol;Acc:29511] [ENSGALT00000011168]		CN219646	1.62674	0.0193	Target: CN219646; Description: CN219646 WLA008D06.ab1 WLbrain Gallus gallus cDNA 5', mRNA sequence; Next best Hit: CN233757(alignment length 14bp with 100.00%identity)
	A_87_P058366	2.05364	0.00285576	; Next best Hit: CN217501(alignment length 60bp with 100.00%identity)		BG641678	1.13774	0.0194901	Target: BG641678; Description: BG641678 pgl1c.pk001.m1 Chicken liver cDNA library Gallus gallus cDNA clone pgl1c.pk001.m1 ; Next best Hit: A_87_P140408(alignment length 19bp with 94.74%identity)
ens|ENSGALT00000010946|gb|CR338796|gb|XM_415249|tc|TC379345	DEPDC5	1.24579	0.00287808	DEP domain containing 5 [Source:HGNC Symbol;Acc:18423] [ENSGALT00000010946]		CN234041	1.85995	0.0195668	Target: CN234041; Description: CN234041 WLA085D05.ab1 WLbrain Gallus gallus cDNA 5', mRNA sequence; Next best Hit: CN220198(alignment length 13bp with 100.00%identity)
ens|ENSGALT00000037398|ens|ENSGALT00000037397|ens|ENSGALT00000023939|gb|CR406671	RSPO3	2.19121	0.0028793	R-spondin 3 [Source:HGNC Symbol;Acc:20866] [ENSGALT00000037398]		CO760469	1.8644	0.0195811	Target: CO760469; Description: CO760469 brain_EST03661 Brain cDNA Library Gallus gallus cDNA 5', mRNA sequence; Next best Hit: BG641993(alignment length 60bp with 100.00%identity)
ens|ENSGALT00000038810|gb|AJ851756|tc|TC443389|tc|TC380393	ZFP91	1.71071	0.00287976	Uncharacterized protein [Source:UniProtKB/TrEMBL;Acc:F1NAI8] [ENSGALT00000038810]		CN225367	1.63509	0.0196071	Target: CN225367; Description: CN225367 WLA071B02.ab1 WLbrain Gallus gallus cDNA 5', mRNA sequence; Next best Hit: CO760081(alignment length 61bp with 96.72%identity)
	CO760537	1.81078	0.00289747	Target: CO760537; Description: CO760537 brain_EST03729 Brain cDNA Library Gallus gallus cDNA 5', mRNA sequence; Next best Hit: CO762187(alignment length 55bp with 92.73%identity)		CN224803	1.9747	0.0196186	Target: CN224803; Description: CN224803 WLA062A10.ab1 WLbrain Gallus gallus cDNA 5', mRNA sequence; Next best Hit: CO759799(alignment length 15bp with 100.00%identity)
tc|TC384306|ref|XM_429591	TC384306	1.28109	0.00290302	PREDICTED: Gallus gallus uncharacterized LOC418575 (LOC418575), mRNA [XM_429591]	tc|NP9666543|tc|TC443698	NP9666543	1.37438	0.0196392	GB
ref|NM_204413|gb|D16367|gb|U00111|tc|TC397156	NFKB2	1.6901	0.00290618	Gallus gallus nuclear factor of kappa light polypeptide gene enhancer in B-cells 2 (p49/p100) (NFKB2), mRNA [NM_204413]	ref|XM_430128	LOC424137	3.23196	0.0196472	PREDICTED: Gallus gallus uncharacterized LOC424137, transcript variant 2 (LOC424137), mRNA [XM_430128]
ens|ENSGALT00000037214|ens|ENSGALT00000037215|tc|TC435227	ENSGALT00000037214	2.52371	0.0029191	Uncharacterized protein [Source:UniProtKB/TrEMBL;Acc:E1C521] [ENSGALT00000037214]	ref|NM_001001302|ens|ENSGALT00000022380|ens|ENSGALT00000040718|gb|AB004801	MYH7	2.74946	0.0197927	Gallus gallus myosin, heavy chain 7, cardiac muscle, beta (MYH7), mRNA [NM_001001302]
ens|ENSGALT00000026723|gb|AJ719721|tc|TC373943	EPT1	1.10826	0.00292091	similar to Selenoprotein I [Source:RefSeq peptide;Acc:NP_001026699] [ENSGALT00000026723]	ens|ENSGALT00000022823|gb|CR385971|gb|CR390206|tc|TC433597	ENSGALT00000022823	1.8298	0.0198218	Uncharacterized protein [Source:UniProtKB/TrEMBL;Acc:F1P1A2] [ENSGALT00000022823]
tc|TC382709|ref|XM_414753	TC382709	3.32254	0.00293808	Rep: Protein FAM20C precursor. - Gallus gallus, partial (98%) [TC382709]	ref|NM_001031331|ref|NM_001146141|ens|ENSGALT00000029555|ens|ENSGALT00000016860	LOC425113	1.76222	0.0198355	Gallus gallus immunoglobulin-like receptor CHIR-AB1-like (LOC425113), mRNA [NM_001031331]
ens|ENSGALT00000038310	ENSGALT00000038310	2.65679	0.00294473	Uncharacterized protein [Source:UniProtKB/TrEMBL;Acc:F1NXS7] [ENSGALT00000038310]		CO763337	1.20903	0.0198676	Target: CO763337; Description: CO763337 brain_EST06529 Brain cDNA Library Gallus gallus cDNA 5', mRNA sequence; Next best Hit: CN216831(alignment length 17bp with 100.00%identity)
gb|CR391367|gb|CR388766|tc|TC403332	CR391367	2.39125	0.00294694	Gallus gallus finished cDNA, clone ChEST262k9. [CR391367]	gb|CR391737	IMMT	2.6803	0.0200062	Gallus gallus finished cDNA, clone ChEST470m14. [CR391737]
tc|TC440182|tc|TC413375|tc|TC410637|ref|XM_003642783	TC440182	1.8964	0.0030183	Rep: Protein HEXIM1 - Homo sapiens (Human), partial (24%) [TC440182]	ens|ENSGALT00000009407|ref|XM_415920	KIAA0664	1.89115	0.0200532	KIAA0664 [Source:HGNC Symbol;Acc:29094] [ENSGALT00000009407]
	CN217258	1.8789	0.00304268	Target: CN217258; Description: CN217258 RJA007F02.ab1 RJbrain Gallus gallus cDNA 5', mRNA sequence; Next best Hit: A_87_P097756(alignment length 14bp with 100.00%identity)	gb|CR391740|tc|TC425078	CR391740	1.15459	0.0200959	Gallus gallus finished cDNA, clone ChEST1028d19. [CR391740]
	CN234412	2.41107	0.00304805	Target: CN234412; Description: CN234412 WLA097F04.ab1 WLbrain Gallus gallus cDNA 5', mRNA sequence; Next best Hit: A_87_P050031(alignment length 14bp with 100.00%identity)	gb|BX929445|tc|TC408335	BX929445	3.58909	0.0201002	Gallus gallus finished cDNA, clone ChEST187i15. [BX929445]
	BG641836	1.26922	0.00305404	Target: BG641836; Description: BG641836 pgl1c.pk002.d6 Chicken liver cDNA library Gallus gallus cDNA clone pgl1c.pk002.d6 ; Next best Hit: CO762422(alignment length 16bp with 100.00%identity)	tc|TC421445|tc|TC426646|ref|XM_001234187	TC421445	3.83081	0.0201597	Rep: Catalytic domain of components of various dehydrogenase complexes - Dinoroseobacter shibae DFL 12, partial (6%) [TC421445]
gb|CR407478|tc|TC404516|ref|XM_003640622|ref|XM_003640623	ARHGEF17	1.29164	0.00305456	Gallus gallus finished cDNA, clone ChEST135b10. [CR407478]	ens|ENSGALT00000006927|gb|XM_422273	LOC424430	2.17757	0.0202857	Uncharacterized protein [Source:UniProtKB/TrEMBL;Acc:F1NVJ2] [ENSGALT00000006927]
gb|BX933128|gb|BX950589|gb|BX930355	BX933128	1.72978	0.00305495	Gallus gallus finished cDNA, clone ChEST916l22. [BX933128]		CN218331	1.83429	0.0203345	Target: CN218331; Description: CN218331 RJA028E06.ab1 RJbrain Gallus gallus cDNA 5', mRNA sequence; Next best Hit: CN218793(alignment length 60bp with 100.00%identity)
gb|XM_422306|tc|TC382488	DPH5	1.59251	0.00305957	PREDICTED: Gallus gallus similar to GekBS016P (LOC424463), mRNA [XM_422306]	gb|CR353568	LGALSL	2.59625	0.0203665	Gallus gallus finished cDNA, clone ChEST57a11. [CR353568]
ref|NM_001004409|ens|ENSGALT00000004156|ens|ENSGALT00000004155|gb|AY657006	TRPC1	1.15344	0.00306227	Gallus gallus transient receptor potential cation channel, subfamily C, member 1 (TRPC1), mRNA [NM_001004409]	ens|ENSGALT00000000419|gb|BX932175|gb|BX935891|gb|BX931462	TNNI1	2.75392	0.0204279	troponin I type 1 (skeletal, slow) [Source:HGNC Symbol;Acc:11945] [ENSGALT00000000419]
	CN221523	3.21625	0.0030708	Target: CN221523; Description: CN221523 RJA077C10.ab1 RJbrain Gallus gallus cDNA 5', mRNA sequence; Next best Hit: A_87_P016299(alignment length 48bp with 100.00%identity)		CO760879	1.32194	0.0204455	Target: CO760879; Description: CO760879 brain_EST04071 Brain cDNA Library Gallus gallus cDNA 5', mRNA sequence; Next best Hit: CO759754(alignment length 61bp with 98.36%identity)
gb|CR524227	CR524227	1.5253	0.00308001	Gallus gallus finished cDNA, clone ChEST1004m2. [CR524227]		CN217462	1.60072	0.0204632	Target: CN217462; Description: CN217462 RJA012F10.ab1 RJbrain Gallus gallus cDNA 5', mRNA sequence; Next best Hit: CN222838(alignment length 60bp with 100.00%identity)
ens|ENSGALT00000029080|tc|TC425864|tc|TC438551|tc|TC442103	CYTB	1.75171	0.00308852	Cytochrome b [Source:UniProtKB/Swiss-Prot;Acc:P18946] [ENSGALT00000029080]	gb|CR406199|tc|TC388297|ref|XM_421853	ZNF804A	1.11464	0.0205856	Gallus gallus finished cDNA, clone ChEST856e9. [CR406199]
ens|ENSGALT00000006032|gb|BX950569	OTUD7A	1.85397	0.00310432	Uncharacterized protein [Source:UniProtKB/TrEMBL;Acc:E1C900] [ENSGALT00000006032]	ens|ENSGALT00000033698|tc|TC397830|tc|TC423118|ref|XM_430150	LOC424428	1.28235	0.0205883	Uncharacterized protein [Source:UniProtKB/TrEMBL;Acc:E1C215] [ENSGALT00000033698]
tc|TC389795|ref|XM_421595	TC389795	1.38498	0.00311015	Rep: Cadherin-23 precursor (Otocadherin). - Gallus gallus, complete [TC389795]	gb|EU240324|tc|TC416598	EU240324	1.32662	0.0206013	Gallus gallus clone 3883 GGN110 snoRNA, complete sequence. [EU240324]
ref|NM_001242604|tc|TC395711|tc|TC403024|tc|TC418870	NCAM1	1.13283	0.00311552	Gallus gallus neural cell adhesion molecule 1 (NCAM1), mRNA [NM_001242604]		CN233939	1.77291	0.0206014	Target: CN233939; Description: CN233939 RJA120G10.ab1 RJbrain Gallus gallus cDNA 5', mRNA sequence; Next best Hit: BG641936(alignment length 14bp with 100.00%identity)
ens|ENSGALT00000010124|tc|TC378488|ref|XM_418542	MLL3	2.38213	0.00311881	Uncharacterized protein [Source:UniProtKB/TrEMBL;Acc:F1NW66] [ENSGALT00000010124]	ens|ENSGALT00000035665|tc|NP9666136|ref|XM_423892	LOC426229	2.94042	0.0207847	GB
gb|CR386345|tc|TC429916	CR386345	1.9765	0.00313377	Gallus gallus finished cDNA, clone ChEST554e3. [CR386345]		CN223371	1.39357	0.0209042	Target: CN223371; Description: CN223371 WLA048H08.ab1 WLbrain Gallus gallus cDNA 5', mRNA sequence; Next best Hit: A_87_P035729(alignment length 14bp with 100.00%identity)
	CO759114	1.6446	0.00313418	Target: CO759114; Description: CO759114 brain_EST02306 Brain cDNA Library Gallus gallus cDNA 5', mRNA sequence; Next best Hit: CO759145(alignment length 60bp with 100.00%identity)	gb|CR386947|gb|BU133745|tc|TC408109	CR386947	2.48093	0.0210743	Gallus gallus finished cDNA, clone ChEST162j2. [CR386947]
ens|ENSGALT00000039133|ens|ENSGALT00000008739	ENSGALT00000039133	4.23634	0.00313752	transmembrane inner ear [Source:HGNC Symbol;Acc:30800] [ENSGALT00000039133]	ref|NM_001006543|ens|ENSGALT00000008412|gb|AJ720573|tc|TC375783	FARSB	1.24203	0.0211491	Gallus gallus phenylalanyl-tRNA synthetase, beta subunit (FARSB), mRNA [NM_001006543]
gb|CR405977|gb|CR406490|tc|TC386564|tc|TC443322	ZNF407	1.21811	0.00314159	Gallus gallus finished cDNA, clone ChEST593j15. [CR405977]	gb|CR388707|gb|DR418842|tc|TC402438	CR388707	1.96458	0.0212028	Gallus gallus finished cDNA, clone ChEST880d8. [CR388707]
gb|CR407152|gb|XM_425476|tc|TC390354	CR407152	1.88747	0.00314219	Gallus gallus finished cDNA, clone ChEST740i23. [CR407152]	ens|ENSGALT00000000021|gb|XR_026702|tc|TC435545	PDE4A	1.33765	0.0213407	PREDICTED: Gallus gallus similar to cAMP-specific phosphodiesterase PDE4D6 (LOC769860), mRNA [XR_026702]
ens|ENSGALT00000032905|ens|ENSGALT00000018527|gb|BU398395|tc|TC396740	C8H1orf173	3.50168	0.00315287	chromosome 1 open reading frame 173 [Source:HGNC Symbol;Acc:25346] [ENSGALT00000032905]	ens|ENSGALT00000039707|tc|TC409626	ENSGALT00000039707	1.50104	0.0213424	Uncharacterized protein [Source:UniProtKB/TrEMBL;Acc:E1BW62] [ENSGALT00000039707]
gb|CR524104	CR524104	1.14559	0.00318951	Gallus gallus finished cDNA, clone ChEST256o23. [CR524104]	gb|CR389099|gb|BX266940|tc|TC443243	CR389099	1.40987	0.0215153	Gallus gallus finished cDNA, clone ChEST827c15. [CR389099]
ref|NM_001006181|ens|ENSGALT00000040019|ens|ENSGALT00000002250|gb|AJ720213	TOP3B	1.57981	0.003192	Gallus gallus topoisomerase (DNA) III beta (TOP3B), mRNA [NM_001006181]	ens|ENSGALT00000018198|ens|ENSGALT00000037723|gb|XM_419589|tc|TC385757	GNPAT	1.50007	0.0215232	glyceronephosphate O-acyltransferase [Source:HGNC Symbol;Acc:4416] [ENSGALT00000018198]
	W66529	2.56973	0.00319748	Target: W66529; Description: W66529 EST002 chicken liver cDNA library, Stratagene (cat.#935402) Gallus gallus cDNA clone CLEST011, mRNA sequence; Next best Hit: A_87_P160238(alignment length 14bp with 100.00%identity)	ens|ENSGALT00000000419|gb|BX934086|gb|BX932175|gb|BX935107	TNNI1	1.99577	0.0215516	troponin I type 1 (skeletal, slow) [Source:HGNC Symbol;Acc:11945] [ENSGALT00000000419]
ens|ENSGALT00000039843|gb|CR385391|tc|TC396787	ENSGALT00000039843	1.23688	0.00323477	Uncharacterized protein [Source:UniProtKB/TrEMBL;Acc:E1BV16] [ENSGALT00000039843]	ens|ENSGALT00000014220|gb|BX931982|gb|BX932496|gb|CR390749	LOC424109	1.28603	0.0216016	Uncharacterized protein [Source:UniProtKB/TrEMBL;Acc:F1NSB1] [ENSGALT00000014220]
gb|CR389881|ref|XM_415573	ANKMY1	2.53522	0.00323648	Gallus gallus finished cDNA, clone ChEST272b10. [CR389881]		CN220205	1.90794	0.0216278	Target: CN220205; Description: CN220205 WLA014A04.ab1 WLbrain Gallus gallus cDNA 5', mRNA sequence; Next best Hit: CN222375(alignment length 60bp with 100.00%identity)
ens|ENSGALT00000036159	ENSGALT00000036159	1.88299	0.00325692	Unknown	ens|ENSGALT00000037120|ens|ENSGALT00000023326|gb|CR405971|gb|BX929362	NOP2	1.16038	0.021752	NOP2 nucleolar protein homolog (yeast) [Source:HGNC Symbol;Acc:7867] [ENSGALT00000037120]
ens|ENSGALT00000023427|ens|ENSGALT00000023426|gb|CR407129|gb|XM_420777	CC2D2A	1.37123	0.00326118	coiled-coil and C2 domain containing 2A [Source:HGNC Symbol;Acc:29253] [ENSGALT00000023427]	ref|NM_204323|ens|ENSGALT00000032933|ens|ENSGALT00000018009|gb|AB033383	LEPR	1.32501	0.0217767	Gallus gallus leptin receptor (LEPR), mRNA [NM_204323]
ens|ENSGALT00000029820|gb|BX933713|gb|BX933760|gb|BX950308	CHCHD5	2.49383	0.00327155	coiled-coil-helix-coiled-coil-helix domain containing 5 [Source:HGNC Symbol;Acc:17840] [ENSGALT00000029820]	gb|XM_428938|tc|TC411737|tc|TC378140	SLC25A12	2.49392	0.0217928	PREDICTED: Gallus gallus similar to Solute carrier family 25 (mitochondrial carrier, Aralar), member 12 (LOC431387), mRNA [XM_428938]
	CO759398	2.0274	0.00327522	Target: CO759398; Description: CO759398 brain_EST02590 Brain cDNA Library Gallus gallus cDNA 5', mRNA sequence; Next best Hit: CO759904(alignment length 60bp with 100.00%identity)	ens|ENSGALT00000009407|gb|XM_415920|tc|TC378103	KIAA0664	1.7748	0.0217951	KIAA0664 [Source:HGNC Symbol;Acc:29094] [ENSGALT00000009407]
ens|ENSGALT00000010230|gb|DR427211|tc|TC399805	FBXL21	1.71158	0.00328086	Uncharacterized protein [Source:UniProtKB/TrEMBL;Acc:E1BUJ9] [ENSGALT00000010230]		CN224480	1.55723	0.0218546	Target: CN224480; Description: CN224480 RJA101F01.ab1 RJbrain Gallus gallus cDNA 5', mRNA sequence; Next best Hit: CO759477(alignment length 13bp with 100.00%identity)
ref|NM_001012890|ens|ENSGALT00000037153|ens|ENSGALT00000025345|gb|CR338872	CTBP1	1.52192	0.0033016	Gallus gallus C-terminal binding protein 1 (CTBP1), mRNA [NM_001012890]	ens|ENSGALT00000023251|ens|ENSGALT00000037336|gb|AY617123	ENSGALT00000023251	1.10055	0.0219339	Uncharacterized protein [Source:UniProtKB/TrEMBL;Acc:F1NHJ0] [ENSGALT00000023251]
	CN225577	1.59913	0.00331114	Target: CN225577; Description: CN225577 WLA074C08.ab1 WLbrain Gallus gallus cDNA 5', mRNA sequence; Next best Hit: BG641639(alignment length 15bp with 100.00%identity)	tc|NP9665472	NP9665472	1.8873	0.0221852	GB
ens|ENSGALT00000034761|ens|ENSGALT00000002727|gb|U07644|gb|XM_413704	NEO1	2.04771	0.0033112	neogenin 1 [Source:HGNC Symbol;Acc:7754] [ENSGALT00000034761]	tc|NP9674193	NP9674193	2.78643	0.0222915	GB
gb|CR387597|gb|BU219433	CR387597	3.00948	0.00332321	Gallus gallus finished cDNA, clone ChEST46p16. [CR387597]		CN219155	1.60305	0.0223304	Target: CN219155; Description: CN219155 WLA001H07.ab1 WLbrain Gallus gallus cDNA 5', mRNA sequence; Next best Hit: A_87_P013223(alignment length 13bp with 100.00%identity)
gb|CR352756	CR352756	2.24931	0.00332401	Gallus gallus finished cDNA, clone ChEST102g14. [CR352756]		CN221196	1.29523	0.0225372	Target: CN221196; Description: CN221196 WLA030A09.ab1 WLbrain Gallus gallus cDNA 5', mRNA sequence; Next best Hit: A_87_P038225(alignment length 39bp with 100.00%identity)
	CO759024	1.63261	0.00332631	Target: CO759024; Description: CO759024 brain_EST02216 Brain cDNA Library Gallus gallus cDNA 5', mRNA sequence; Next best Hit: CO759028(alignment length 60bp with 100.00%identity)	ref|NM_001012578|ens|ENSGALT00000017294|gb|CR388903|gb|AJ851480	ACSL1	2.1164	0.0225946	Gallus gallus acyl-CoA synthetase long-chain family member 1 (ACSL1), mRNA [NM_001012578]
gb|CR407525|gb|BU362266|tc|TC398681|tc|TC400481	CR407525	2.27215	0.00333063	Gallus gallus finished cDNA, clone ChEST661g12. [CR407525]	tc|TC420519|tc|TC433154|tc|TC405870|tc|TC404225	TC420519	4.5601	0.0225987	Rep: Predicted protein - Nematostella vectensis (Starlet sea anemone), partial (56%) [TC420519]
ens|ENSGALT00000024254|gb|CR353935|gb|XM_416560|tc|TC382572	CHD1L	1.64634	0.00333634	chromodomain helicase DNA binding protein 1-like [Source:HGNC Symbol;Acc:1916] [ENSGALT00000024254]		CO763165	1.50421	0.0226052	Target: CO763165; Description: CO763165 brain_EST06357 Brain cDNA Library Gallus gallus cDNA 5', mRNA sequence; Next best Hit: CO760961(alignment length 14bp with 100.00%identity)
ens|ENSGALT00000029081|tc|TC425212|tc|TC421505|tc|TC442906	ND5	2.42749	0.00335129	NADH-ubiquinone oxidoreductase chain 5 [Source:UniProtKB/Swiss-Prot;Acc:P18940] [ENSGALT00000029081]	gb|XM_416394|tc|TC384421	BCL2L13	2.32198	0.0226369	PREDICTED: Gallus gallus BCL2-like 13 (apoptosis facilitator) (BCL2L13), mRNA [XM_416394]
ens|ENSGALT00000016104|gb|BX929975|tc|TC381206	ENSGALT00000016104	1.20274	0.0033558	WD repeat domain 65 [Source:HGNC Symbol;Acc:26485] [ENSGALT00000016104]	ens|ENSGALT00000000712|gb|BU364505|tc|TC406725|ref|XM_419251	KLHL12	1.1538	0.0226645	kelch-like 12 (Drosophila) [Source:HGNC Symbol;Acc:19360] [ENSGALT00000000712]
gb|XM_415627|tc|TC411391|tc|TC438989	UNC13D	2.55666	0.00335789	PREDICTED: Gallus gallus similar to mammalian unc13-4 (LOC417369), mRNA [XM_415627]	ens|ENSGALT00000012122|gb|XM_413911|tc|TC380639	DENND4A	1.33355	0.0226739	DENN/MADD domain containing 4A [Source:HGNC Symbol;Acc:24321] [ENSGALT00000012122]
ref|NM_001110177|ens|ENSGALT00000024713|gb|CR386448|gb|DQ503407	SOBP	2.12736	0.00336708	Gallus gallus sine oculis binding protein homolog (Drosophila) (SOBP), mRNA [NM_001110177]	gb|CR388810|gb|XM_417781|tc|TC381726|tc|TC378562	KIAA0319L	1.87098	0.0227757	Gallus gallus finished cDNA, clone ChEST689k23. [CR388810]
	CN235929	1.39711	0.00337246	Target: CN235929; Description: CN235929 WLA109D03.ab1 WLbrain Gallus gallus cDNA 5', mRNA sequence; Next best Hit: A_87_P035975(alignment length 15bp with 100.00%identity)	tc|NP9671212	NP9671212	1.39673	0.0227973	GB
ens|ENSGALT00000004113|tc|TC383568|tc|TC388334|ref|XM_422593	U2SURP	1.26652	0.00337869	U2 snRNP-associated SURP domain containing [Source:HGNC Symbol;Acc:30855] [ENSGALT00000004113]		CO764250	5.19007	0.0228608	Target: CO764250; Description: CO764250 brain_EST07442 Brain cDNA Library Gallus gallus cDNA 5', mRNA sequence; Next best Hit: CO759731(alignment length 15bp with 100.00%identity)
	CN224681	1.36857	0.00339249	Target: CN224681; Description: CN224681 WLA059E08.ab1 WLbrain Gallus gallus cDNA 5', mRNA sequence; Next best Hit: A_87_P003373(alignment length 24bp with 100.00%identity)	ens|ENSGALT00000027439|tc|TC378977|ref|XM_417045	ZC3H13	1.15304	0.0228695	zinc finger CCCH-type containing 13 [Source:HGNC Symbol;Acc:20368] [ENSGALT00000027439]
ref|NM_001012813|ens|ENSGALT00000019288|gb|CR523758|gb|AJ720836	ATF7IP	2.91664	0.00339252	Gallus gallus activating transcription factor 7 interacting protein (ATF7IP), mRNA [NM_001012813]	gb|AJ719589|gb|AJ455001|tc|TC395189	LOC776333	1.99303	0.0229995	Gallus gallus partial mRNA for hypothetical protein, clone 4e9. [AJ719589]
tc|NP9667303	NP9667303	4.16332	0.00341908	GB		CN219767	1.73131	0.0232489	Target: CN219767; Description: CN219767 RJA056H05.ab1 RJbrain Gallus gallus cDNA 5', mRNA sequence; Next best Hit: CN217449(alignment length 14bp with 100.00%identity)
ref|NM_001012785|ens|ENSGALT00000040514|ens|ENSGALT00000040512|ens|ENSGALT00000008880	TCOF1	1.7192	0.00342495	Gallus gallus Treacher Collins-Franceschetti syndrome 1 (TCOF1), mRNA [NM_001012785]	ens|ENSGALT00000021280|tc|TC407442|ref|XM_419014	SBK2	3.26299	0.0233765	Uncharacterized protein [Source:UniProtKB/TrEMBL;Acc:E1BXS6] [ENSGALT00000021280]
ens|ENSGALT00000023603|ref|XM_422861	GON4L	1.34321	0.00344736	PREDICTED: Gallus gallus gon-4-like (C. elegans) (GON4L), mRNA [XM_422861]	ens|ENSGALT00000005307|tc|TC381291|ref|XM_414551	NOP16	1.76732	0.0234248	NOP16 nucleolar protein homolog (yeast) [Source:HGNC Symbol;Acc:26934] [ENSGALT00000005307]
	CO759036	2.05641	0.00347773	Target: CO759036; Description: CO759036 brain_EST02228 Brain cDNA Library Gallus gallus cDNA 5', mRNA sequence; Next best Hit: CO759038(alignment length 60bp with 100.00%identity)	ens|ENSGALT00000026105|tc|TC426311|ref|XM_416751	ENSGALT00000026105	4.24252	0.0234389	Uncharacterized protein [Source:UniProtKB/TrEMBL;Acc:E1BYH7] [ENSGALT00000026105]
ens|ENSGALT00000012164|gb|XM_420102|tc|TC384371	ABCC3	2.48302	0.00348445	Uncharacterized protein [Source:UniProtKB/TrEMBL;Acc:F1NM51] [ENSGALT00000012164]		CN217806	1.85761	0.0234561	Target: CN217806; Description: CN217806 RJA018E07.ab1 RJbrain Gallus gallus cDNA 5', mRNA sequence; Next best Hit: CN224350(alignment length 60bp with 100.00%identity)
tc|TC387096|tc|TC433997|ref|XM_001233010|ref|XM_003641859	TC387096	2.26044	0.00349197	Rep: Ectoderm-neural cortex protein 2 - Homo sapiens (Human), complete [TC387096]	tc|NP9665989	NP9665989	1.47248	0.0234772	GB
	CO762527	1.23286	0.00350475	Target: CO762527; Description: CO762527 brain_EST05719 Brain cDNA Library Gallus gallus cDNA 5', mRNA sequence; Next best Hit: A_87_P060081(alignment length 16bp with 100.00%identity)		CN225721	1.18398	0.0234799	Target: CN225721; Description: CN225721 WLA077B01.ab1 WLbrain Gallus gallus cDNA 5', mRNA sequence; Next best Hit: CO761228(alignment length 15bp with 100.00%identity)
gb|CR389111	CR389111	2.19104	0.00350594	Gallus gallus finished cDNA, clone ChEST836m17. [CR389111]	gb|BX935786|tc|TC439792	BX935786	1.69054	0.0235044	Gallus gallus finished cDNA, clone ChEST160l9. [BX935786]
ref|NM_204923|ens|ENSGALT00000038629|ens|ENSGALT00000029971|ens|ENSGALT00000021611	PPP1R9B	1.37943	0.0035277	Gallus gallus protein phosphatase 1, regulatory (inhibitor) subunit 9B (PPP1R9B), mRNA [NM_204923]		CN725565	4.28628	0.0235665	Target: CN725565; Description: CN725565 ROS_liv83 Chicken 7 weeks liver cDNA library Gallus gallus cDNA, mRNA sequence; Next best Hit: BG641593(alignment length 56bp with 100.00%identity)
ens|ENSGALT00000005815|ens|ENSGALT00000039815|gb|U14555|gb|BX950454	ENSGALT00000005815	1.13222	0.00353382	zinc finger and BTB domain containing 17 [Source:HGNC Symbol;Acc:12936] [ENSGALT00000005815]	ref|NM_204195|ens|ENSGALT00000011718|gb|U12467|gb|AB011803	SOX3	1.96431	0.0235954	Gallus gallus SRY (sex determining region Y)-box 3 (SOX3), mRNA [NM_204195]
	CN225404	1.86186	0.00354193	Target: CN225404; Description: CN225404 WLA071F09.ab1 WLbrain Gallus gallus cDNA 5', mRNA sequence; Next best Hit: A_87_P152253(alignment length 15bp with 100.00%identity)		CN218240	3.29622	0.023653	Target: CN218240; Description: CN218240 RJA027B04.ab1 RJbrain Gallus gallus cDNA 5', mRNA sequence; Next best Hit: CN218895(alignment length 60bp with 100.00%identity)
gb|CR389416|gb|XM_421606|tc|TC386867	LOC423731	1.25021	0.00354338	Gallus gallus finished cDNA, clone ChEST183a11. [CR389416]	ref|NM_204291|gb|Y18008|gb|AF020315|gb|AF218449	P2RX4	1.57954	0.0237294	Gallus gallus purinergic receptor P2X, ligand-gated ion channel, 4 (P2RX4), mRNA [NM_204291]
ens|ENSGALT00000022784|gb|XM_001235612|tc|TC381378	ITPR2	1.99905	0.00355025	inositol 1,4,5-trisphosphate receptor, type 2 [Source:HGNC Symbol;Acc:6181] [ENSGALT00000022784]	gb|XM_428938|tc|TC411737|tc|TC378140	SLC25A12	2.38676	0.0241027	PREDICTED: Gallus gallus similar to Solute carrier family 25 (mitochondrial carrier, Aralar), member 12 (LOC431387), mRNA [XM_428938]
ens|ENSGALT00000038470|gb|AJ720482|tc|TC387476	ARFIP1	2.84125	0.00358115	ADP-ribosylation factor interacting protein 1 [Source:HGNC Symbol;Acc:21496] [ENSGALT00000038470]	ref|NM_001031123|ens|ENSGALT00000022631|ens|ENSGALT00000012527|gb|AJ851557	USP12P1	1.19283	0.0241404	Gallus gallus ubiquitin specific peptidase 12 pseudogene 1 (USP12P1), mRNA [NM_001031123]
ens|ENSGALT00000012360|gb|BX931229|tc|TC393649	ENSGALT00000012360	2.12673	0.00358474	Uncharacterized protein [Source:UniProtKB/TrEMBL;Acc:E1C7I9] [ENSGALT00000012360]	ens|ENSGALT00000005307|tc|TC381291|ref|XM_414551	NOP16	1.15898	0.0241544	NOP16 nucleolar protein homolog (yeast) [Source:HGNC Symbol;Acc:26934] [ENSGALT00000005307]
gb|BX932510	BX932510	1.87354	0.00358772	Gallus gallus finished cDNA, clone ChEST619h23. [BX932510]		CN220490	1.12245	0.0242196	Target: CN220490; Description: CN220490 WLA016D08.ab1 WLbrain Gallus gallus cDNA 5', mRNA sequence; Next best Hit: CN221783(alignment length 60bp with 100.00%identity)
	W66519	3.02168	0.00359178	Target: W66519; Description: W66519 EST077 chicken liver cDNA library, Stratagene (cat.#935402) Gallus gallus cDNA clone CLEST047 similar to Chicken mitochondrial genome, mRNA sequence; Next best Hit: CO761124(alignment length 60bp with 100.00%identity)	ens|ENSGALT00000010618|tc|TC426469|tc|TC434166	SETD5	1.30233	0.0243033	SET domain containing 5 [Source:HGNC Symbol;Acc:25566] [ENSGALT00000010618]
gb|CR353619|tc|TC408879	NKTR	1.26571	0.00360302	Gallus gallus finished cDNA, clone ChEST111c17. [CR353619]		CN217627	2.36323	0.0243485	Target: CN217627; Description: CN217627 RJA015E11.ab1 RJbrain Gallus gallus cDNA 5', mRNA sequence; Next best Hit: CN224161(alignment length 14bp with 100.00%identity)
	CN224201	1.74272	0.00361044	Target: CN224201; Description: CN224201 RJA099H03.ab1 RJbrain Gallus gallus cDNA 5', mRNA sequence; Next best Hit: CN216829(alignment length 60bp with 96.67%identity)	ens|ENSGALT00000040693|gb|J00911|gb|CR389053|tc|TC417313	ENSGALT00000040693	2.60571	0.0243514	tropomyosin 3 [Source:HGNC Symbol;Acc:12012] [ENSGALT00000040693]
ens|ENSGALT00000008142	NUP210	1.35098	0.00361979	nucleoporin 210kDa [Source:HGNC Symbol;Acc:30052] [ENSGALT00000008142]		CN220377	1.56484	0.024447	Target: CN220377; Description: CN220377 WLA015E12.ab1 WLbrain Gallus gallus cDNA 5', mRNA sequence; Next best Hit: CN225503(alignment length 60bp with 100.00%identity)
	CN217709	3.43625	0.00363393	Target: CN217709; Description: CN217709 RJA016H02.ab1 RJbrain Gallus gallus cDNA 5', mRNA sequence; Next best Hit: CN220350(alignment length 14bp with 100.00%identity)		CN222053	1.24613	0.0245739	Target: CN222053; Description: CN222053 RJA081H08.ab1 RJbrain Gallus gallus cDNA 5', mRNA sequence; Next best Hit: CN219399(alignment length 17bp with 100.00%identity)
ens|ENSGALT00000038364|ens|ENSGALT00000024268|gb|CR352724	ENSGALT00000038364	1.66223	0.00363684	Uncharacterized protein [Source:UniProtKB/TrEMBL;Acc:E1BZT1] [ENSGALT00000038364]		AW198376	3.91103	0.0246251	Target: AW198376; Description: AW198376 pnl-b.pk0007.a5 chicken liver cDNA library Gallus gallus cDNA clone pnl-b.pk0007.a5 ; Next best Hit: BG641593(alignment length 60bp with 100.00%identity)
ens|ENSGALT00000018221|gb|BX929923|gb|BX934669|gb|XM_416130	CEP290	2.28349	0.00363849	centrosomal protein 290kDa [Source:HGNC Symbol;Acc:29021] [ENSGALT00000018221]	ref|NM_001012700|ens|ENSGALT00000009951|gb|BX932319|gb|AJ851451	LARP4	1.41886	0.0247511	Gallus gallus La ribonucleoprotein domain family, member 4 (LARP4), mRNA [NM_001012700]
ens|ENSGALT00000004533|gb|BX929416|gb|BX932404|tc|TC385289	ENSGALT00000004533	1.52677	0.00364204	zinc finger and BTB domain containing 38 [Source:HGNC Symbol;Acc:26636] [ENSGALT00000004533]	ref|NM_001001302|ens|ENSGALT00000022380|ens|ENSGALT00000040713|ens|ENSGALT00000040718	MYH7	3.50027	0.0247714	Gallus gallus myosin, heavy chain 7, cardiac muscle, beta (MYH7), mRNA [NM_001001302]
gb|CR386409	CR386409	2.82963	0.00366993	Gallus gallus finished cDNA, clone ChEST232a21. [CR386409]	ens|ENSGALT00000030680|ens|ENSGALT00000028355|gb|XM_001231668|tc|TC378105	TTC9	1.49798	0.0248286	tetratricopeptide repeat domain 9 [Source:HGNC Symbol;Acc:20267] [ENSGALT00000030680]
gb|CR386528	CR386528	1.59889	0.00367219	Gallus gallus finished cDNA, clone ChEST335d15. [CR386528]	gb|XM_417640|tc|TC378644|tc|TC427604|tc|TC432904	MFN2	1.51653	0.0249096	PREDICTED: Gallus gallus similar to Mitofusin 2 (LOC419484), mRNA [XM_417640]
ens|ENSGALT00000035409|tc|TC392344|ref|XM_421909	C7H2orf66	1.99217	0.00367444	chromosome 2 open reading frame 66 [Source:HGNC Symbol;Acc:33809] [ENSGALT00000035409]		BG641593	4.41534	0.0250656	Target: BG641593; Description: BG641593 pgl1c.pk001.h14 Chicken liver cDNA library Gallus gallus cDNA clone pgl1c.pk001.h14 ; Next best Hit: A_87_P194128(alignment length 14bp with 100.00%identity)
ens|ENSGALT00000036931	ENSGALT00000036931	1.43072	0.00367748	Uncharacterized protein [Source:UniProtKB/TrEMBL;Acc:E1C1L0] [ENSGALT00000036931]	ref|NM_205410|gb|M59039|gb|BU308942|tc|TC391187	PLN	4.15241	0.0250926	Gallus gallus phospholamban (PLN), mRNA [NM_205410]
gb|BX931053|gb|BU457234|tc|TC398853|ref|XM_424311	BX931053	3.64235	0.00368556	Gallus gallus finished cDNA, clone ChEST206n19. [BX931053]		CN225565	3.06793	0.025105	Target: CN225565; Description: CN225565 WLA074A12.ab1 WLbrain Gallus gallus cDNA 5', mRNA sequence; Next best Hit: A_87_P061061(alignment length 25bp with 100.00%identity)
ref|NM_001012776|ens|ENSGALT00000004428|gb|CR523985|gb|AJ719765	WDR59	1.35148	0.00368786	Gallus gallus WD repeat domain 59 (WDR59), mRNA [NM_001012776]		CN217474	1.95364	0.0253835	Target: CN217474; Description: CN217474 RJA012G12.ab1 RJbrain Gallus gallus cDNA 5', mRNA sequence; Next best Hit: CN219381(alignment length 60bp with 100.00%identity)
ens|ENSGALT00000002878|tc|TC380855|ref|XM_425743	B3GALT6	1.36082	0.0036914	UDP-Gal:betaGal beta 1,3-galactosyltransferase polypeptide 6 [Source:HGNC Symbol;Acc:17978] [ENSGALT00000002878]	gb|CR523566|tc|TC432363	EFTUD2	3.83567	0.0254101	Gallus gallus finished cDNA, clone ChEST531e21. [CR523566]
ref|NM_204256|ens|ENSGALT00000037288|gb|AY094490|gb|AJ851674	CDKN1B	1.10023	0.00369325	Gallus gallus cyclin-dependent kinase inhibitor 1B (p27, Kip1) (CDKN1B), mRNA [NM_204256]	gb|BX935028	BX935028	1.94023	0.0255991	Gallus gallus finished cDNA, clone ChEST299e3. [BX935028]
ens|ENSGALT00000005036|gb|CR523822|gb|XM_415437|tc|TC381584	C17H9orf96	2.39279	0.00371083	chromosome 9 open reading frame 96 [Source:HGNC Symbol;Acc:28669] [ENSGALT00000005036]	ens|ENSGALT00000031983|gb|XM_001233278|tc|TC416617|tc|TC392102	KLC4	1.36744	0.0256288	kinesin light chain 4 [Source:HGNC Symbol;Acc:21624] [ENSGALT00000031983]
gb|XM_001232084|tc|NP9669457|tc|NP9676059|tc|TC377768	XM_001232084	1.92563	0.00371872	PREDICTED: Gallus gallus hypothetical protein LOC768924 (LOC768924), partial mRNA [XM_001232084]	ref|NM_001030703|ens|ENSGALT00000002784|gb|AJ719379|tc|TC373604	JMJD6	1.2929	0.0256669	Gallus gallus jumonji domain containing 6 (JMJD6), mRNA [NM_001030703]
	CO761915	2.36614	0.00371966	Target: CO761915; Description: CO761915 brain_EST05107 Brain cDNA Library Gallus gallus cDNA 5', mRNA sequence; Next best Hit: A_87_P037304(alignment length 15bp with 100.00%identity)		CN221084	1.1793	0.0256945	Target: CN221084; Description: CN221084 RJA071D12.ab1 RJbrain Gallus gallus cDNA 5', mRNA sequence; Next best Hit: CN220677(alignment length 14bp with 100.00%identity)
	CN225433	3.71045	0.00372695	Target: CN225433; Description: CN225433 WLA072A09.ab1 WLbrain Gallus gallus cDNA 5', mRNA sequence; Next best Hit: CN223420(alignment length 15bp with 100.00%identity)		CN218010	1.17592	0.0256987	Target: CN218010; Description: CN218010 RJA022E02.ab1 RJbrain Gallus gallus cDNA 5', mRNA sequence; Next best Hit: CN223903(alignment length 60bp with 100.00%identity)
ens|ENSGALT00000012332|ens|ENSGALT00000031411|gb|XM_001232653|tc|TC397925	ENSGALT00000012332	1.44172	0.00372942	Uncharacterized protein [Source:UniProtKB/TrEMBL;Acc:F1NAS7] [ENSGALT00000012332]		CN220865	1.25747	0.025727	Target: CN220865; Description: CN220865 WLA025A09.ab1 WLbrain Gallus gallus cDNA 5', mRNA sequence; Next best Hit: CN220644(alignment length 19bp with 100.00%identity)
tc|TC410637|tc|TC441342|tc|TC440182|tc|TC389755	TC410637	2.20729	0.00375634	Rep: hexamethylene bis-acetamide inducible 1 - Canis familiaris, partial (36%) [TC410637]	gb|CR407268	CR407268	2.48896	0.0257414	Gallus gallus finished cDNA, clone ChEST471m7. [CR407268]
ref|NM_001030729|ens|ENSGALT00000013290|gb|CR407366|gb|AJ851671	ORC5	2.80224	0.00376403	Gallus gallus origin recognition complex, subunit 5 (ORC5), mRNA [NM_001030729]	ens|ENSGALT00000024550|gb|CO772524|tc|TC402374|ref|XM_424853	TPPP2	1.77641	0.0258119	tubulin polymerization-promoting protein family member 2 [Source:HGNC Symbol;Acc:19293] [ENSGALT00000024550]
gb|CR391590	CR391590	2.62652	0.00376498	Gallus gallus finished cDNA, clone ChEST797a22. [CR391590]	ens|ENSGALT00000036775	ENSGALT00000036775	1.28675	0.0258763	Uncharacterized protein [Source:UniProtKB/TrEMBL;Acc:E1C2U4] [ENSGALT00000036775]
gb|CR353187|gb|CR386348|gb|CR387752|tc|TC402986	LOC417447	1.26125	0.00378443	Gallus gallus finished cDNA, clone ChEST139b12. [CR353187]	ref|NM_001040090|ens|ENSGALT00000007313|gb|CR385857|gb|AB193190	AR	1.03373	0.0259065	Gallus gallus androgen receptor (AR), mRNA [NM_001040090]
ens|ENSGALT00000035129|tc|TC430734|tc|TC418777	ENSGALT00000035129	1.87565	0.00379109	Uncharacterized protein [Source:UniProtKB/TrEMBL;Acc:F1NYS0] [ENSGALT00000035129]		A_87_P193478	1.34566	0.0259078	; Next best Hit: CN221361(alignment length 60bp with 100.00%identity)
gb|XM_415259|tc|TC398668	C15H12orf43	2.36499	0.00380764	PREDICTED: Gallus gallus similar to Chromosome 12 open reading frame 43 (LOC416966), mRNA [XM_415259]		CO762495	4.35892	0.0260294	Target: CO762495; Description: CO762495 brain_EST05687 Brain cDNA Library Gallus gallus cDNA 5', mRNA sequence; Next best Hit: A_87_P008900(alignment length 40bp with 97.50%identity)
	CN223542	1.34156	0.00381121	Target: CN223542; Description: CN223542 RJA095B10.ab1 RJbrain Gallus gallus cDNA 5', mRNA sequence; Next best Hit: A_87_P023903(alignment length 15bp with 100.00%identity)	ref|NM_204499|gb|AF518734|gb|DQ925485|gb|AF285171	LOC395160	1.31285	0.0260913	Gallus gallus transcription factor Crx (LOC395160), mRNA [NM_204499]
ref|NM_001031480|ens|ENSGALT00000016103|gb|AJ720691|tc|TC375142	DYRK2	1.11431	0.00381566	Gallus gallus dual-specificity tyrosine-(Y)-phosphorylation regulated kinase 2 (DYRK2), mRNA [NM_001031480]	gb|BX931806|tc|TC429261	TMPRSS13	2.25513	0.0261222	Gallus gallus finished cDNA, clone ChEST553j6. [BX931806]
ref|NM_001024694|ens|ENSGALT00000010796|gb|BX935536|gb|BX929548	RLBP1	1.85526	0.00381783	Gallus gallus retinaldehyde binding protein 1 (RLBP1), mRNA [NM_001024694]	ref|NM_204573|gb|AB023438|gb|AB000832|gb|AB056475	LOC395260	1.71248	0.0261422	Gallus gallus cgABP260 (LOC395260), mRNA [NM_204573]
	CO762343	2.43722	0.00382448	Target: CO762343; Description: CO762343 brain_EST05535 Brain cDNA Library Gallus gallus cDNA 5', mRNA sequence; Next best Hit: CO762867(alignment length 60bp with 100.00%identity)	ref|NM_001012901|ens|ENSGALT00000037743|ens|ENSGALT00000016737|gb|BX934617	DLST	1.70276	0.0262557	Gallus gallus dihydrolipoamide S-succinyltransferase (E2 component of 2-oxo-glutarate complex) (DLST), nuclear gene encoding mitochondrial protein, mRNA [NM_001012901]
ref|NM_001199498|ens|ENSGALT00000006744|tc|TC417933	IFITM5	5.91953	0.00383165	Gallus gallus interferon induced transmembrane protein 5 (IFITM5), mRNA [NM_001199498]	gb|BX934251|gb|BX934221|gb|BU389015|tc|TC411680	BX934251	1.41706	0.0263053	Gallus gallus finished cDNA, clone ChEST670a17. [BX934251]
ens|ENSGALT00000009480|gb|CR390479	ENSGALT00000009480	2.75951	0.0038346	signal peptide, CUB domain, EGF-like 2 [Source:HGNC Symbol;Acc:30425] [ENSGALT00000009480]		CN217850	2.88936	0.0263471	Target: CN217850; Description: CN217850 RJA020B08.ab1 RJbrain Gallus gallus cDNA 5', mRNA sequence; Next best Hit: CN225127(alignment length 60bp with 100.00%identity)
gb|BX929605|gb|BX934374|gb|BX929614|gb|BU219204	BX929605	2.45359	0.00383534	Gallus gallus finished cDNA, clone ChEST739i15. [BX929605]	ens|ENSGALT00000005561|gb|CR524251|ref|XM_424400	AGPAT6	1.95576	0.0263939	1-acylglycerol-3-phosphate O-acyltransferase 6 (lysophosphatidic acid acyltransferase, zeta) [Source:HGNC Symbol;Acc:20880] [ENSGALT00000005561]
ens|ENSGALT00000022828|gb|BX934397|gb|XR_026895|ref|XM_003641236	ENSGALT00000022828	2.48841	0.00384251	FRY-like [Source:HGNC Symbol;Acc:29127] [ENSGALT00000022828]		CN225156	1.33637	0.0266023	Target: CN225156; Description: CN225156 WLA068A11.ab1 WLbrain Gallus gallus cDNA 5', mRNA sequence; Next best Hit: A_87_P069611(alignment length 14bp with 100.00%identity)
ens|ENSGALT00000040115	ENSGALT00000040115	2.47768	0.003851	Uncharacterized protein [Source:UniProtKB/TrEMBL;Acc:F1NXF5] [ENSGALT00000040115]		CN216834	2.86741	0.0266093	Target: CN216834; Description: CN216834 RJA001D02.ab1 RJbrain Gallus gallus cDNA 5', mRNA sequence; Next best Hit: A_87_P095581(alignment length 17bp with 100.00%identity)
ens|ENSGALT00000010124|tc|TC391834|tc|TC425708|tc|TC423575	MLL3	2.70331	0.00385302	Uncharacterized protein [Source:UniProtKB/TrEMBL;Acc:F1NW66] [ENSGALT00000010124]	gb|CR390880|tc|TC438547	CR390880	2.55547	0.0266582	Gallus gallus finished cDNA, clone ChEST970b5. [CR390880]
ref|NM_206978|ens|ENSGALT00000000876|gb|AY518184|tc|TC400102	ZCCHC17	1.26357	0.00385927	Gallus gallus zinc finger, CCHC domain containing 17 (ZCCHC17), mRNA [NM_206978]		CN235391	2.19888	0.0268021	Target: CN235391; Description: CN235391 WLA107D10.ab1 WLbrain Gallus gallus cDNA 5', mRNA sequence; Next best Hit: CN234932(alignment length 53bp with 94.34%identity)
gb|CR523368|tc|TC393988	CR523368	2.13385	0.00386101	Gallus gallus finished cDNA, clone ChEST876e1. [CR523368]		CN225911	1.54445	0.02692	Target: CN225911; Description: CN225911 WLA081B02.ab1 WLbrain Gallus gallus cDNA 5', mRNA sequence; Next best Hit: CN224967(alignment length 25bp with 100.00%identity)
	CN219060	2.09958	0.00388909	Target: CN219060; Description: CN219060 RJA048E05.ab1 RJbrain Gallus gallus cDNA 5', mRNA sequence; Next best Hit: CN217694(alignment length 15bp with 100.00%identity)		CO759827	1.46138	0.0269865	Target: CO759827; Description: CO759827 brain_EST03019 Brain cDNA Library Gallus gallus cDNA 5', mRNA sequence; Next best Hit: CN223232(alignment length 14bp with 100.00%identity)
ref|NM_001006573|ens|ENSGALT00000003504|ens|ENSGALT00000039112|gb|AJ719414	LOC427001	1.09672	0.00390343	Gallus gallus exonuclease NEF-sp (LOC427001), mRNA [NM_001006573]	ens|ENSGALT00000035511|tc|NP9664995|tc|TC425556|tc|TC412477	ENSGALT00000035511	2.36621	0.0269996	perilipin 3 [Source:HGNC Symbol;Acc:16893] [ENSGALT00000035511]
ref|NM_001030365|ens|ENSGALT00000039962|ens|ENSGALT00000039960|ens|ENSGALT00000004943	ERBB4	1.41476	0.00392988	Gallus gallus v-erb-a erythroblastic leukemia viral oncogene homolog 4 (avian) (ERBB4), mRNA [NM_001030365]		CN225241	1.42339	0.0270401	Target: CN225241; Description: CN225241 WLA069C12.ab1 WLbrain Gallus gallus cDNA 5', mRNA sequence; Next best Hit: CN217189(alignment length 15bp with 100.00%identity)
gb|CR389532|gb|CR353051|gb|DR414716|tc|TC418802	CR389532	1.84402	0.0039461	Gallus gallus finished cDNA, clone ChEST303i9. [CR389532]	ens|ENSGALT00000028263|ens|ENSGALT00000000126	ENSGALT00000028263	1.08869	0.0271693	Unknown
ens|ENSGALT00000018826|gb|BX935694|gb|BX930307|gb|CR524158	SDAD1	1.24666	0.00396768	SDA1 domain containing 1 [Source:HGNC Symbol;Acc:25537] [ENSGALT00000018826]		CO759178	1.4118	0.027337	Target: CO759178; Description: CO759178 brain_EST02370 Brain cDNA Library Gallus gallus cDNA 5', mRNA sequence; Next best Hit: CN218650(alignment length 19bp with 94.74%identity)
gb|CR386706	CR386706	1.54141	0.00398134	Gallus gallus finished cDNA, clone ChEST299j12. [CR386706]	tc|NP9675172	NP9675172	1.44877	0.0274158	GB
	CO763371	1.74654	0.00398135	Target: CO763371; Description: CO763371 brain_EST06563 Brain cDNA Library Gallus gallus cDNA 5', mRNA sequence; Next best Hit: CO763403(alignment length 53bp with 100.00%identity)	ref|NM_001012534|ens|ENSGALT00000019502|gb|CR524069|gb|CR523573	TOB2	1.21629	0.0274163	Gallus gallus transducer of ERBB2, 2 (TOB2), mRNA [NM_001012534]
gb|CR353679	CR353679	1.37539	0.00399297	Gallus gallus finished cDNA, clone ChEST225e3. [CR353679]		CN218156	1.57402	0.0275024	Target: CN218156; Description: CN218156 RJA025C12.ab1 RJbrain Gallus gallus cDNA 5', mRNA sequence; Next best Hit: CN224263(alignment length 60bp with 100.00%identity)
ens|ENSGALT00000036232|ens|ENSGALT00000036233|ens|ENSGALT00000011770|ens|ENSGALT00000036234	ENSGALT00000036232	2.88409	0.00400027	Ca++-dependent secretion activator [Source:HGNC Symbol;Acc:1426] [ENSGALT00000036232]	ens|ENSGALT00000038640	ENSGALT00000038640	1.77275	0.0275441	Uncharacterized protein [Source:UniProtKB/TrEMBL;Acc:E1BRX8] [ENSGALT00000038640]
	CO759018	1.56044	0.00401833	Target: CO759018; Description: CO759018 brain_EST02210 Brain cDNA Library Gallus gallus cDNA 5', mRNA sequence; Next best Hit: CO759025(alignment length 60bp with 100.00%identity)	ens|ENSGALT00000019332|gb|CR353898|gb|XM_418800|tc|TC407534	LIMD1	1.0834	0.0276326	LIM domains containing 1 [Source:HGNC Symbol;Acc:6612] [ENSGALT00000019332]
ref|NM_001252276|ens|ENSGALT00000019527|gb|CR387914|tc|TC420882	CHADL	1.25942	0.00401838	Gallus gallus chondroadherin-like (CHADL), mRNA [NM_001252276]		CN219068	2.52564	0.0276359	Target: CN219068; Description: CN219068 RJA048F08.ab1 RJbrain Gallus gallus cDNA 5', mRNA sequence; Next best Hit: A_87_P021644(alignment length 24bp with 100.00%identity)
	CO760950	1.47608	0.00401857	Target: CO760950; Description: CO760950 brain_EST04142 Brain cDNA Library Gallus gallus cDNA 5', mRNA sequence; Next best Hit: A_87_P010946(alignment length 18bp with 100.00%identity)	ens|ENSGALT00000036002|tc|TC427228	ENSGALT00000036002	2.8263	0.0276572	acetyl-CoA carboxylase alpha [Source:HGNC Symbol;Acc:84] [ENSGALT00000036002]
gb|BX931479|gb|XM_413930	ITGA11	1.62991	0.00402146	Gallus gallus finished cDNA, clone ChEST655k3. [BX931479]	ens|ENSGALT00000010618|gb|CR352679	SETD5	1.13035	0.0276733	SET domain containing 5 [Source:HGNC Symbol;Acc:25566] [ENSGALT00000010618]
tc|NP9678613	NP9678613	1.9252	0.00403448	GB		CO762164	2.5513	0.0277701	Target: CO762164; Description: CO762164 brain_EST05356 Brain cDNA Library Gallus gallus cDNA 5', mRNA sequence; Next best Hit: CN219683(alignment length 14bp with 100.00%identity)
ref|NM_001031586|gb|AJ851632|gb|AJ737360|tc|TC376034	CDK5RAP3	1.07899	0.00404507	Gallus gallus CDK5 regulatory subunit associated protein 3 (CDK5RAP3), mRNA [NM_001031586]	gb|BX932134	BX932134	1.29413	0.0277745	Gallus gallus finished cDNA, clone ChEST466f11. [BX932134]
	CN217140	1.86769	0.00404903	Target: CN217140; Description: CN217140 RJA005H07.ab1 RJbrain Gallus gallus cDNA 5', mRNA sequence; Next best Hit: CN233341(alignment length 60bp with 100.00%identity)	ref|NM_001079731|ens|ENSGALT00000017107|gb|AJ719297|tc|TC397989	ADCK1	1.18521	0.0278096	Gallus gallus aarF domain containing kinase 1 (ADCK1), mRNA [NM_001079731]
ens|ENSGALT00000039690	ZNF518A	2.28033	0.00405474	Uncharacterized protein [Source:UniProtKB/TrEMBL;Acc:E1BXZ2] [ENSGALT00000039690]	ens|ENSGALT00000027110|gb|BX266614|ref|XM_416918	ENSGALT00000027110	1.74117	0.0280305	Sodium/hydrogen exchanger [Source:UniProtKB/TrEMBL;Acc:E1BV56] [ENSGALT00000027110]
gb|CO772450|tc|TC385470	CO772450	1.12651	0.00407183	testis_EST03547 Testis cDNA Library Gallus gallus cDNA 3', mRNA sequence [CO772450]	gb|CR523118|tc|TC401180	CR523118	1.83023	0.0282925	Gallus gallus finished cDNA, clone ChEST1036h12. [CR523118]
ens|ENSGALT00000004538|gb|XM_001231573|tc|TC377286	C13H5orf41	1.42534	0.00407476	Uncharacterized protein [Source:UniProtKB/TrEMBL;Acc:F1N8U9] [ENSGALT00000004538]	ref|NM_001030538|ens|ENSGALT00000038380|ens|ENSGALT00000024235|gb|AM179859	JAK2	1.2267	0.0283785	Gallus gallus janus kinase 2 (JAK2), mRNA [NM_001030538]
ens|ENSGALT00000025075|tc|TC385796|ref|XM_418283	ARFGEF1	2.73868	0.00408431	ADP-ribosylation factor guanine nucleotide-exchange factor 1 (brefeldin A-inhibited) [Source:HGNC Symbol;Acc:15772] [ENSGALT00000025075]	gb|CR352600	CR352600	1.57101	0.0284884	Gallus gallus finished cDNA, clone ChEST839c23. [CR352600]
	CO763564	1.85471	0.00408588	Target: CO763564; Description: CO763564 brain_EST06756 Brain cDNA Library Gallus gallus cDNA 5', mRNA sequence; Next best Hit: CO762187(alignment length 60bp with 96.67%identity)	gb|XM_422144|tc|TC382103	SPOPL	2.26088	0.0286154	PREDICTED: Gallus gallus hypothetical LOC424299 (LOC424299), mRNA [XM_422144]
gb|CR389104|gb|BU265773|tc|TC423628	CR389104	2.10265	0.00409974	Gallus gallus finished cDNA, clone ChEST836h23. [CR389104]	ref|NM_001007917|ens|ENSGALT00000008128|gb|AJ720634|tc|TC412639	MPP1	1.1177	0.0286232	Gallus gallus membrane protein, palmitoylated 1, 55kDa (MPP1), mRNA [NM_001007917]
tc|NP9675608	NP9675608	2.43155	0.00411212	GB		CN235351	1.5857	0.0287641	Target: CN235351; Description: CN235351 WLA107C03.ab1 WLbrain Gallus gallus cDNA 5', mRNA sequence; Next best Hit: CO761388(alignment length 16bp with 100.00%identity)
ref|NM_001031030|ens|ENSGALT00000000748|gb|AJ720443|tc|TC375037	ZC3H11A	2.35519	0.00411565	Gallus gallus zinc finger CCCH-type containing 11A (ZC3H11A), mRNA [NM_001031030]	ens|ENSGALT00000030134	ENSGALT00000030134	1.32151	0.0288169	Uncharacterized protein [Source:UniProtKB/TrEMBL;Acc:F1NP67] [ENSGALT00000030134]
ens|ENSGALT00000010124|gb|BU463549|tc|TC425708|tc|TC423575	MLL3	2.68189	0.00412339	Uncharacterized protein [Source:UniProtKB/TrEMBL;Acc:F1NW66] [ENSGALT00000010124]	gb|CR407081|gb|XM_415765|tc|TC378761	CR407081	1.94042	0.0288474	Gallus gallus finished cDNA, clone ChEST743j19. [CR407081]
ens|ENSGALT00000023673|tc|TC444205|ref|XM_001231385	FAM131B	3.33409	0.00412371	family with sequence similarity 131, member B [Source:HGNC Symbol;Acc:22202] [ENSGALT00000023673]		CN233879	1.16954	0.0289555	Target: CN233879; Description: CN233879 RJA119H04.ab1 RJbrain Gallus gallus cDNA 5', mRNA sequence; Next best Hit: CN221001(alignment length 15bp with 100.00%identity)
ref|NM_001245037|ens|ENSGALT00000041263|gb|AY325274|tc|TC373881	PCDHGA2	2.65599	0.00412412	Gallus gallus protocadherin gamma subfamily A, 2 (PCDHGA2), mRNA [NM_001245037]	gb|XM_001232786|tc|NP9678896|tc|NP9678897|tc|NP9678894	SCN5A	2.96101	0.0291054	PREDICTED: Gallus gallus oltage-gated sodium channel type V alpha, transcript variant 2 (SCN5A), mRNA [XM_001232786]
ref|NM_001012580|ens|ENSGALT00000023102|gb|AJ851547|tc|TC396623	PDS5A	2.27263	0.00415446	Gallus gallus PDS5, regulator of cohesion maintenance, homolog A (S. cerevisiae) (PDS5A), mRNA [NM_001012580]	ens|ENSGALT00000023325|tc|NP9666046|ref|XM_428548	EVI5L	1.2161	0.02918	ecotropic viral integration site 5-like [Source:HGNC Symbol;Acc:30464] [ENSGALT00000023325]
gb|CR522967|ref|XM_003640643	CR522967	1.32689	0.00415576	Gallus gallus finished cDNA, clone ChEST752b6. [CR522967]	ens|ENSGALT00000005892|ens|ENSGALT00000005891|gb|BX950677|gb|BX932186	RAPGEF1	1.60016	0.0291922	Rap guanine nucleotide exchange factor (GEF) 1 [Source:HGNC Symbol;Acc:4568] [ENSGALT00000005892]
ens|ENSGALT00000036587|gb|CR406063	ENSGALT00000036587	2.9288	0.00416715	Uncharacterized protein [Source:UniProtKB/TrEMBL;Acc:F1N9V5] [ENSGALT00000036587]		CN233484	1.43012	0.0291943	Target: CN233484; Description: CN233484 RJA112D03.ab1 RJbrain Gallus gallus cDNA 5', mRNA sequence; Next best Hit: CN233359(alignment length 18bp with 94.44%identity)
ens|ENSGALT00000008713|gb|XM_001232518|tc|TC435799|tc|TC381332	OGT	1.45457	0.00418715	O-linked N-acetylglucosamine (GlcNAc) transferase (UDP-N-acetylglucosamine:polypeptide-N-acetylglucosaminyl transferase) [Source:HGNC Symbol;Acc:8127] [ENSGALT00000008713]	gb|AJ721074|tc|TC374996	AJ721074	1.58373	0.0291979	Gallus gallus mRNA for hypothetical protein, clone 34d21. [AJ721074]
	CO759179	1.77322	0.00419848	Target: CO759179; Description: CO759179 brain_EST02371 Brain cDNA Library Gallus gallus cDNA 5', mRNA sequence; Next best Hit: CO759252(alignment length 60bp with 100.00%identity)	gb|CR406304|ref|XR_139984	CR406304	2.60468	0.0292019	Gallus gallus finished cDNA, clone ChEST870h23. [CR406304]
gb|CR389525	CALD1	1.16566	0.00420401	Gallus gallus finished cDNA, clone ChEST302g7. [CR389525]	ref|NM_001079575|ens|ENSGALT00000009013|gb|CR353294|gb|BX930531	NTHL1	1.63409	0.029234	Gallus gallus nth endonuclease III-like 1 (E. coli) (NTHL1), mRNA [NM_001079575]
	CO759751	1.35693	0.00420894	Target: CO759751; Description: CO759751 brain_EST02943 Brain cDNA Library Gallus gallus cDNA 5', mRNA sequence; Next best Hit: CN218872(alignment length 14bp with 100.00%identity)	ref|NM_204177|ens|ENSGALT00000021652|gb|BX929571|gb|AF069771	LDHB	2.5367	0.0295666	Gallus gallus lactate dehydrogenase B (LDHB), mRNA [NM_204177]
ens|ENSGALT00000014504|tc|TC398250|ref|XM_003640911	ENSGALT00000014504	1.86652	0.00421146	Uncharacterized protein [Source:UniProtKB/TrEMBL;Acc:E1BY62] [ENSGALT00000014504]		CN219987	1.27006	0.0295924	Target: CN219987; Description: CN219987 WLA012A05.ab1 WLbrain Gallus gallus cDNA 5', mRNA sequence; Next best Hit: CN221303(alignment length 62bp with 96.77%identity)
ref|NM_001031366|gb|AJ851711|tc|TC374197	AKAP8L	1.18643	0.0042123	Gallus gallus A kinase (PRKA) anchor protein 8-like (AKAP8L), mRNA [NM_001031366]	gb|EU240249	EU240249	1.767	0.0296972	Gallus gallus clone 2533 GGN31 snoRNA, complete sequence. [EU240249]
gb|CR733334|gb|CV859147|tc|TC395035|tc|TC423792	CR733334	1.22755	0.00421427	Gallus gallus finished cDNA, clone ChEST922k17. [CR733334]	ens|ENSGALT00000022317	SERAC1	1.34005	0.0297233	serine active site containing 1 [Source:HGNC Symbol;Acc:21061] [ENSGALT00000022317]
ens|ENSGALT00000022068|gb|CO773030|tc|TC405831	ENSGALT00000022068	1.76279	0.00421883	testis_EST04127 Testis cDNA Library Gallus gallus cDNA 3', mRNA sequence [CO773030]	ens|ENSGALT00000038665	CHRNA1	1.80138	0.0297699	cholinergic receptor, nicotinic, alpha 1 (muscle) [Source:RefSeq peptide;Acc:NP_990147] [ENSGALT00000038665]
ens|ENSGALT00000017828|gb|BX275554|tc|TC380915|ref|XM_422516	KANK4	1.8714	0.00422999	KN motif and ankyrin repeat domains 4 [Source:HGNC Symbol;Acc:27263] [ENSGALT00000017828]	ref|NM_204177|ens|ENSGALT00000021652|gb|AF218799|gb|BX929571	LDHB	2.6855	0.0298817	Gallus gallus lactate dehydrogenase B (LDHB), mRNA [NM_204177]
	CO762304	1.49512	0.00423225	Target: CO762304; Description: CO762304 brain_EST05496 Brain cDNA Library Gallus gallus cDNA 5', mRNA sequence; Next best Hit: CO763787(alignment length 60bp with 100.00%identity)	ens|ENSGALT00000007437	SMG7	1.26787	0.0298982	smg-7 homolog, nonsense mediated mRNA decay factor (C. elegans) [Source:HGNC Symbol;Acc:16792] [ENSGALT00000007437]
	CO760092	1.17613	0.0042324	Target: CO760092; Description: CO760092 brain_EST03284 Brain cDNA Library Gallus gallus cDNA 5', mRNA sequence; Next best Hit: CN219540(alignment length 14bp with 100.00%identity)	gb|CR390993	CR390993	3.31612	0.0299112	Gallus gallus finished cDNA, clone ChEST750m12. [CR390993]
ens|ENSGALT00000010124|gb|BU463549|tc|TC425708|tc|TC423575	MLL3	2.6995	0.00423541	Uncharacterized protein [Source:UniProtKB/TrEMBL;Acc:F1NW66] [ENSGALT00000010124]	ens|ENSGALT00000007881|gb|BU457172|tc|TC433211|tc|TC407720	COQ4	2.10592	0.0300077	coenzyme Q4 homolog (S. cerevisiae) [Source:HGNC Symbol;Acc:19693] [ENSGALT00000007881]
	CN224261	2.36541	0.00425322	Target: CN224261; Description: CN224261 WLA055A11.ab1 WLbrain Gallus gallus cDNA 5', mRNA sequence; Next best Hit: CN233933(alignment length 21bp with 95.24%identity)	ens|ENSGALT00000039313|gb|M66385|gb|XM_415130|tc|TC374540	ATP2A2	2.39262	0.030153	Sarcoplasmic/endoplasmic reticulum calcium ATPase 2 [Source:UniProtKB/Swiss-Prot;Acc:Q03669] [ENSGALT00000039313]
ens|ENSGALT00000014716|gb|BX935436|gb|BX929444|gb|BX935397	TBC1D8B	1.50076	0.00425608	TBC1 domain family, member 8B (with GRAM domain) [Source:HGNC Symbol;Acc:24715] [ENSGALT00000014716]		CN221807	2.31116	0.0301757	Target: CN221807; Description: CN221807 WLA034G06.ab1 WLbrain Gallus gallus cDNA 5', mRNA sequence; Next best Hit: A_87_P128503(alignment length 13bp with 100.00%identity)
	W66515	2.63678	0.00428396	Target: W66515; Description: W66515 EST073 chicken liver cDNA library, Stratagene (cat.#935402) Gallus gallus cDNA clone CLEST020 similar to Chicken mitochondrial genome, mRNA sequence; Next best Hit: W66521(alignment length 60bp with 100.00%identity)	ens|ENSGALT00000035748	ENSGALT00000035748	2.20079	0.0302007	Unknown
	BI392699	2.14507	0.00430637	Target: BI392699; Description: BI392699 pgp1n.pk008.m24 Normalized Chicken Pituitary/Hypothalamus/Pineal Library Gallus gallus cDNA clone pgp1n.pk008.m24 ; Next best Hit: CO762570(alignment length 30bp with 100.00%identity)		CO762372	1.82763	0.0302459	Target: CO762372; Description: CO762372 brain_EST05564 Brain cDNA Library Gallus gallus cDNA 5', mRNA sequence; Next best Hit: A_87_P055076(alignment length 25bp with 92.00%identity)
	CO761866	1.17071	0.00432321	Target: CO761866; Description: CO761866 brain_EST05058 Brain cDNA Library Gallus gallus cDNA 5', mRNA sequence; Next best Hit: CO763191(alignment length 14bp with 100.00%identity)	ens|ENSGALT00000034006|gb|BU465630|tc|TC420384|tc|TC412861	LOC769438	1.63422	0.0303213	Uncharacterized protein [Source:UniProtKB/TrEMBL;Acc:F1NSD8] [ENSGALT00000034006]
	CN225718	3.62444	0.00432894	Target: CN225718; Description: CN225718 WLA076H09.ab1 WLbrain Gallus gallus cDNA 5', mRNA sequence; Next best Hit: CN217594(alignment length 14bp with 100.00%identity)	ref|NM_001031477|ens|ENSGALT00000040251|gb|AJ851534|tc|TC374223	YWHAG	1.49726	0.030329	Gallus gallus tyrosine 3-monooxygenase/tryptophan 5-monooxygenase activation protein, gamma polypeptide (YWHAG), mRNA [NM_001031477]
	CO763178	2.5115	0.00433063	Target: CO763178; Description: CO763178 brain_EST06370 Brain cDNA Library Gallus gallus cDNA 5', mRNA sequence; Next best Hit: CN233951(alignment length 14bp with 100.00%identity)	ref|NM_001001604|ens|ENSGALT00000011148|gb|AJ699419|gb|CR406140	ST8SIA2	3.14052	0.0303633	Gallus gallus ST8 alpha-N-acetyl-neuraminide alpha-2,8-sialyltransferase 2 (ST8SIA2), mRNA [NM_001001604]
ens|ENSGALT00000041153	ENSGALT00000041153	2.07558	0.00433156	Uncharacterized protein [Source:UniProtKB/TrEMBL;Acc:E1BYE4] [ENSGALT00000041153]		CN221711	1.85523	0.0306294	Target: CN221711; Description: CN221711 RJA079E03.ab1 RJbrain Gallus gallus cDNA 5', mRNA sequence; Next best Hit: CN224803(alignment length 60bp with 100.00%identity)
	AW198242	1.82475	0.0043478	Target: AW198242; Description: AW198242 pnl-b.pk0001.d1 chicken liver cDNA library Gallus gallus cDNA clone pnl-b.pk0001.d1 ; Next best Hit: CO759036(alignment length 60bp with 96.67%identity)	ens|ENSGALT00000025097|ens|ENSGALT00000036702|tc|NP9678119|tc|NP9678118	C2H8orf34	1.92335	0.0306523	chromosome 8 open reading frame 34 [Source:HGNC Symbol;Acc:30905] [ENSGALT00000025097]
	CO759355	2.7659	0.00435242	Target: CO759355; Description: CO759355 brain_EST02547 Brain cDNA Library Gallus gallus cDNA 5', mRNA sequence; Next best Hit: CO759507(alignment length 60bp with 100.00%identity)	ref|NM_001199529|ens|ENSGALT00000004265|tc|TC382107	CISD1	1.87683	0.0307354	Gallus gallus CDGSH iron sulfur domain 1 (CISD1), mRNA [NM_001199529]
	CO762926	2.54965	0.00435335	Target: CO762926; Description: CO762926 brain_EST06118 Brain cDNA Library Gallus gallus cDNA 5', mRNA sequence; Next best Hit: CO759028(alignment length 48bp with 97.92%identity)		CN225834	1.9813	0.0308196	Target: CN225834; Description: CN225834 WLA079D03.ab1 WLbrain Gallus gallus cDNA 5', mRNA sequence; Next best Hit: CN222241(alignment length 14bp with 100.00%identity)
ens|ENSGALT00000039944|tc|TC386473	ENSGALT00000039944	2.45368	0.00435694	Uncharacterized protein [Source:UniProtKB/TrEMBL;Acc:F1P274] [ENSGALT00000039944]	ref|NM_001006443|ens|ENSGALT00000017270|gb|AJ719388|tc|TC376093	SLC25A4	2.03818	0.0309131	Gallus gallus solute carrier family 25 (mitochondrial carrier; adenine nucleotide translocator), member 4 (SLC25A4), nuclear gene encoding mitochondrial protein, mRNA [NM_001006443]
ens|ENSGALT00000014353	ENSGALT00000014353	4.11183	0.0043895	Uncharacterized protein [Source:UniProtKB/TrEMBL;Acc:E1BRT0] [ENSGALT00000014353]		CO764015	1.26347	0.0310458	Target: CO764015; Description: CO764015 brain_EST07207 Brain cDNA Library Gallus gallus cDNA 5', mRNA sequence; Next best Hit: CO763562(alignment length 53bp with 94.34%identity)
ref|NM_205306|ens|ENSGALT00000037473|gb|X03477|tc|TC436223	MYB	3.66989	0.00439675	Gallus gallus v-myb myeloblastosis viral oncogene homolog (avian) (MYB), mRNA [NM_205306]	ref|NM_001031359|ens|ENSGALT00000021958|tc|TC414073|tc|TC406202	MRPL28	2.4025	0.0313428	Gallus gallus mitochondrial ribosomal protein L28 (MRPL28), nuclear gene encoding mitochondrial protein, mRNA [NM_001031359]
tc|TC413091|ref|XM_003642276	TC413091	1.82714	0.00442569	Rep: Multiple epidermal growth factor-like domains 9 precursor (EGF-like domain-containing protein 5) (Multiple EGF-like domain protein 5). - Gallus gallus, partial (63%) [TC413091]	gb|CR353278|gb|CR389005|gb|BU215531|tc|TC414079	CR353278	1.55635	0.0314296	Gallus gallus finished cDNA, clone ChEST42g8. [CR353278]
	CN216985	1.42641	0.00442627	Target: CN216985; Description: CN216985 RJA003D12.ab1 RJbrain Gallus gallus cDNA 5', mRNA sequence; Next best Hit: CN217042(alignment length 60bp with 100.00%identity)		CO762463	4.08929	0.0316081	Target: CO762463; Description: CO762463 brain_EST05655 Brain cDNA Library Gallus gallus cDNA 5', mRNA sequence; Next best Hit: A_87_P056451(alignment length 30bp with 100.00%identity)
	AW198438	2.11839	0.00443039	Target: AW198438; Description: AW198438 pnl-b.pk0008.c3 chicken liver cDNA library Gallus gallus cDNA clone pnl-b.pk0008.c3 ; Next best Hit: A_87_P224638(alignment length 16bp with 100.00%identity)	tc|TC379421|ref|XM_416932	TC379421	2.05273	0.0316275	Rep: POU domain, class 4, transcription factor 1 - Mus musculus (Mouse), partial (8%) [TC379421]
ens|ENSGALT00000029090|tc|TC423539|tc|TC406256|tc|TC415042	COX2	2.0876	0.00443569	Cytochrome c oxidase subunit 2 [Source:UniProtKB/Swiss-Prot;Acc:P18944] [ENSGALT00000029090]	ens|ENSGALT00000039313|gb|M66385|gb|XM_415130|tc|TC374540	ATP2A2	2.42767	0.0316367	Sarcoplasmic/endoplasmic reticulum calcium ATPase 2 [Source:UniProtKB/Swiss-Prot;Acc:Q03669] [ENSGALT00000039313]
ref|NM_204961|ens|ENSGALT00000038964|ens|ENSGALT00000009129|ens|ENSGALT00000034669	NOS2	1.50502	0.00444187	Gallus gallus nitric oxide synthase 2, inducible (NOS2), mRNA [NM_204961]	ens|ENSGALT00000008944	AKAP1	1.96977	0.0318211	A kinase (PRKA) anchor protein 1 [Source:HGNC Symbol;Acc:367] [ENSGALT00000008944]
gb|CR391252	CR391252	1.91894	0.00444225	Gallus gallus finished cDNA, clone ChEST203p7. [CR391252]	ens|ENSGALT00000002633|gb|CR407172|gb|XM_413700|tc|TC390887	C10H15orf59	1.44449	0.031828	chromosome 15 open reading frame 59 [Source:HGNC Symbol;Acc:33753] [ENSGALT00000002633]
ref|NM_205331|ens|ENSGALT00000017878|gb|X70471|tc|TC377873	GSC	1.15671	0.00445643	Gallus gallus goosecoid homeobox (GSC), mRNA [NM_205331]	tc|NP9668964	NP9668964	1.36044	0.0318493	GB
ens|ENSGALT00000029084|tc|TC438489|tc|TC441137|tc|TC413004	ND4	2.27911	0.00447653	NADH-ubiquinone oxidoreductase chain 4 [Source:UniProtKB/Swiss-Prot;Acc:P18939] [ENSGALT00000029084]		CN217145	1.37299	0.0319664	Target: CN217145; Description: CN217145 RJA006A05.ab1 RJbrain Gallus gallus cDNA 5', mRNA sequence; Next best Hit: A_87_P015444(alignment length 14bp with 100.00%identity)
ref|NM_001012818|ens|ENSGALT00000037070|gb|AJ719325|tc|TC388573	PEX5	1.75555	0.00448258	Gallus gallus peroxisomal biogenesis factor 5 (PEX5), mRNA [NM_001012818]	ens|ENSGALT00000008944|tc|TC419513|tc|TC415174	AKAP1	1.44081	0.0320507	A kinase (PRKA) anchor protein 1 [Source:HGNC Symbol;Acc:367] [ENSGALT00000008944]
ens|ENSGALT00000026612|gb|BX931492	ATAD2B	2.58496	0.0044886	Uncharacterized protein [Source:UniProtKB/TrEMBL;Acc:F1NUE7] [ENSGALT00000026612]	tc|NP9670087	NP9670087	1.96721	0.0321579	GB
tc|NP9670778	NP9670778	1.6643	0.00450364	GB		CO760628	3.14909	0.0322377	Target: CO760628; Description: CO760628 brain_EST03820 Brain cDNA Library Gallus gallus cDNA 5', mRNA sequence; Next best Hit: CO761515(alignment length 60bp with 98.33%identity)
ens|ENSGALT00000022146	ENSGALT00000022146	1.21854	0.00452819	Uncharacterized protein [Source:UniProtKB/TrEMBL;Acc:E1BX09] [ENSGALT00000022146]	ens|ENSGALT00000009008	PITX3	1.5071	0.0322479	Uncharacterized protein [Source:UniProtKB/TrEMBL;Acc:E1C143] [ENSGALT00000009008]
tc|TC443910|tc|TC416914	TC443910	2.32978	0.00453386	Rep: Histone H2A.Z - Homo sapiens (Human), partial (24%) [TC443910]	gb|XM_001235170|tc|TC381428	MKNK1	2.13275	0.0322623	PREDICTED: Gallus gallus similar to MNK1 (LOC771961), mRNA [XM_001235170]
ens|ENSGALT00000029291|gb|CO635556|tc|TC418570|tc|TC434562	LOC426213	4.73144	0.00453753	chromosome 2 open reading frame 62 [Source:HGNC Symbol;Acc:25062] [ENSGALT00000029291]	tc|TC443443|ref|XM_001232457	TC443443	1.12377	0.0323886	Rep: MGC84773 protein - Xenopus laevis (African clawed frog), partial (57%) [TC443443]
gb|CR391156	CR391156	1.55998	0.00454627	Gallus gallus finished cDNA, clone ChEST203c2. [CR391156]	ref|NM_204727|ens|ENSGALT00000000448|gb|CR389996|gb|S74622	PPP1R12B	1.75353	0.0324029	Gallus gallus protein phosphatase 1, regulatory (inhibitor) subunit 12B (PPP1R12B), mRNA [NM_204727]
gb|CO773030|tc|TC405831|tc|TC443564	CO773030	2.67821	0.00455915	testis_EST04127 Testis cDNA Library Gallus gallus cDNA 3', mRNA sequence [CO773030]		CO761724	1.32144	0.0324513	Target: CO761724; Description: CO761724 brain_EST04916 Brain cDNA Library Gallus gallus cDNA 5', mRNA sequence; Next best Hit: BG642108(alignment length 15bp with 100.00%identity)
	CO762609	2.08448	0.00456968	Target: CO762609; Description: CO762609 brain_EST05801 Brain cDNA Library Gallus gallus cDNA 5', mRNA sequence; Next best Hit: CN233734(alignment length 15bp with 100.00%identity)	gb|BX270141|tc|TC377140|ref|XM_422690	BX270141	1.56714	0.032499	BX270141 AGENAE Gallus gallus multi-tissues normalized library (gcag) Gallus gallus cDNA clone gcag0019.o.07 5prim, mRNA sequence [BX270141]
gb|BX933974|ref|XM_416990	GPC5	2.06664	0.00458821	Gallus gallus finished cDNA, clone ChEST59j20. [BX933974]	gb|XM_428938|tc|TC411737|tc|TC422282|tc|TC378140	SLC25A12	2.61751	0.0325149	PREDICTED: Gallus gallus similar to Solute carrier family 25 (mitochondrial carrier, Aralar), member 12 (LOC431387), mRNA [XM_428938]
	CO761624	3.67434	0.0046073	Target: CO761624; Description: CO761624 brain_EST04816 Brain cDNA Library Gallus gallus cDNA 5', mRNA sequence; Next best Hit: CO763671(alignment length 60bp with 100.00%identity)	gb|CR387061|gb|BU142646	CR387061	1.3838	0.0325483	Gallus gallus finished cDNA, clone ChEST124k4. [CR387061]
gb|CR405883|gb|BU279846	CR405883	1.74675	0.00462349	Gallus gallus finished cDNA, clone ChEST884f7. [CR405883]	ens|ENSGALT00000006583	SH3BP4	1.71982	0.0325605	SH3-domain binding protein 4 [Source:HGNC Symbol;Acc:10826] [ENSGALT00000006583]
tc|TC416914	TC416914	1.61953	0.00462773	Rep: Histone H2A.Z - Homo sapiens (Human), partial (66%) [TC416914]		CO759754	1.39831	0.0327842	Target: CO759754; Description: CO759754 brain_EST02946 Brain cDNA Library Gallus gallus cDNA 5', mRNA sequence; Next best Hit: CO760591(alignment length 60bp with 100.00%identity)
	CN217117	2.73723	0.00462828	Target: CN217117; Description: CN217117 RJA005E10.ab1 RJbrain Gallus gallus cDNA 5', mRNA sequence; Next best Hit: CN221140(alignment length 60bp with 100.00%identity)	ens|ENSGALT00000002613|gb|BU138613	LOC428183	1.18679	0.0327951	Uncharacterized protein [Source:UniProtKB/TrEMBL;Acc:F1NIE0] [ENSGALT00000002613]
	CN222996	2.40505	0.00463697	Target: CN222996; Description: CN222996 WLA045B08.ab1 WLbrain Gallus gallus cDNA 5', mRNA sequence; Next best Hit: CN218521(alignment length 15bp with 100.00%identity)	ens|ENSGALT00000040693|tc|TC427961	ENSGALT00000040693	2.62652	0.0328006	tropomyosin 3 [Source:HGNC Symbol;Acc:12012] [ENSGALT00000040693]
ens|ENSGALT00000037155	ENSGALT00000037155	2.36989	0.00464296	Uncharacterized protein [Source:UniProtKB/TrEMBL;Acc:F1NJD2] [ENSGALT00000037155]	ens|ENSGALT00000000763|gb|BX932661|gb|BX934929|gb|CR354022	LOC415859	1.90798	0.032823	Uncharacterized protein [Source:UniProtKB/TrEMBL;Acc:E1C8H1] [ENSGALT00000000763]
ref|NM_001031350|ens|ENSGALT00000011879|ens|ENSGALT00000000404|gb|AJ851587	METTL22	2.60774	0.00464386	Gallus gallus methyltransferase like 22 (METTL22), mRNA [NM_001031350]	gb|BX934627	ST7	1.34345	0.0328409	Gallus gallus finished cDNA, clone ChEST846g19. [BX934627]
ens|ENSGALT00000021369|gb|BX931376|gb|BX931875|tc|TC428276	EPS8	1.47308	0.00465095	epidermal growth factor receptor pathway substrate 8 [Source:HGNC Symbol;Acc:3420] [ENSGALT00000021369]	gb|XR_026679|tc|TC415931|tc|TC414281	PCSK1	1.64339	0.0328626	PREDICTED: Gallus gallus similar to PC1 (LOC769230), mRNA [XR_026679]
ens|ENSGALT00000017187	ENSGALT00000017187	1.76124	0.00465799	Uncharacterized protein [Source:UniProtKB/TrEMBL;Acc:E1C8L5] [ENSGALT00000017187]		A_87_P159293	2.11462	0.0329595	; Next best Hit: CN233912(alignment length 60bp with 100.00%identity)
tc|NP9678405	NP9678405	2.43262	0.00466133	GB	gb|CR523975	CR523975	1.20182	0.0330299	Gallus gallus finished cDNA, clone ChEST702l22. [CR523975]
gb|CR390376	CR390376	1.40397	0.00466522	Gallus gallus finished cDNA, clone ChEST422g6. [CR390376]		CN223635	1.56965	0.0331131	Target: CN223635; Description: CN223635 WLA050E05.ab1 WLbrain Gallus gallus cDNA 5', mRNA sequence; Next best Hit: CN218086(alignment length 60bp with 95.00%identity)
tc|NP9671738	NP9671738	2.32575	0.00467281	GB	ref|NM_001031613|ens|ENSGALT00000036168|gb|CR385616|gb|AJ851374	DAPK1	2.79088	0.0333297	Gallus gallus death-associated protein kinase 1 (DAPK1), mRNA [NM_001031613]
ens|ENSGALT00000025374|ref|XM_001232350	FAM164A	2.98271	0.00468076	family with sequence similarity 164, member A [Source:HGNC Symbol;Acc:24277] [ENSGALT00000025374]	ref|NM_001012823|ens|ENSGALT00000026377|ens|ENSGALT00000036634|gb|CR390142	ACOT9	1.12871	0.0334427	Gallus gallus acyl-CoA thioesterase 9 (ACOT9), nuclear gene encoding mitochondrial protein, mRNA [NM_001012823]
ens|ENSGALT00000032906|tc|TC436589	ENSGALT00000032906	2.70349	0.0046979	Uncharacterized protein [Source:UniProtKB/TrEMBL;Acc:F1NDX2] [ENSGALT00000032906]	ens|ENSGALT00000021270|gb|XM_416390|tc|TC399746	CECR5	1.74966	0.0334463	cat eye syndrome chromosome region, candidate 5 [Source:HGNC Symbol;Acc:1843] [ENSGALT00000021270]
ref|NM_001197308|ens|ENSGALT00000020803|gb|HQ264100|tc|TC423059	ELOVL2	1.64582	0.00470473	Gallus gallus ELOVL fatty acid elongase 2 (ELOVL2), mRNA [NM_001197308]	ref|NM_001030957|ens|ENSGALT00000031308|gb|AJ720446|tc|TC418904	HIGD1A	1.26458	0.0335658	Gallus gallus HIG1 hypoxia inducible domain family, member 1A (HIGD1A), mRNA [NM_001030957]
	CO760442	2.04092	0.00472363	Target: CO760442; Description: CO760442 brain_EST03634 Brain cDNA Library Gallus gallus cDNA 5', mRNA sequence; Next best Hit: CO762592(alignment length 33bp with 96.97%identity)	ens|ENSGALT00000029820|gb|BX933713|gb|BX933760|gb|BX950308	CHCHD5	2.04217	0.0336723	coiled-coil-helix-coiled-coil-helix domain containing 5 [Source:HGNC Symbol;Acc:17840] [ENSGALT00000029820]
ens|ENSGALT00000024885|ens|ENSGALT00000036866|ens|ENSGALT00000036204|gb|CR406253	ENSGALT00000024885	2.64079	0.0047401	Uncharacterized protein [Source:UniProtKB/TrEMBL;Acc:F1NRF5] [ENSGALT00000024885]		CN225581	1.3463	0.0336876	Target: CN225581; Description: CN225581 WLA074D02.ab1 WLbrain Gallus gallus cDNA 5', mRNA sequence; Next best Hit: CN220230(alignment length 13bp with 100.00%identity)
ens|ENSGALT00000016328|ens|ENSGALT00000038269|gb|CR386939|gb|XM_419473	ENSGALT00000016328	2.65252	0.00474286	solute carrier family 4 (anion exchanger), member 1, adaptor protein [Source:HGNC Symbol;Acc:13813] [ENSGALT00000016328]	gb|U85022|gb|CR390125|tc|NP345916|ref|XM_424041	SM1	3.08495	0.0336997	Gallus gallus slow myosin heavy chain 1 (SM1) mRNA, partial cds. [U85022]
ref|NM_001030975|ens|ENSGALT00000031216|ens|ENSGALT00000015427|gb|AJ719706	FAM133	1.70472	0.00474455	Gallus gallus protein FAM133 (FAM133), mRNA [NM_001030975]	gb|XM_425080|tc|TC389423	AGBL1	2.02639	0.0337154	PREDICTED: Gallus gallus similar to KIAA1035 protein (LOC427507), mRNA [XM_425080]
gb|CR354201	RBBP6	2.03024	0.00477561	Gallus gallus finished cDNA, clone ChEST66f6. [CR354201]	ref|NM_205410|ens|ENSGALT00000024024|gb|M59039|tc|TC414247	PLN	4.39467	0.0337925	Gallus gallus phospholamban (PLN), mRNA [NM_205410]
ref|NM_204445|ens|ENSGALT00000007189|gb|AY226461|tc|TC419908	PDE6G	1.35136	0.0047855	Gallus gallus phosphodiesterase 6G, cGMP-specific, rod, gamma (PDE6G), mRNA [NM_204445]	ens|ENSGALT00000021327|gb|BU112326|tc|TC395354	UBE2QL1	1.7002	0.0338562	ubiquitin-conjugating enzyme E2Q family-like 1 [Source:HGNC Symbol;Acc:37269] [ENSGALT00000021327]
	CN224233	3.57424	0.00479512	Target: CN224233; Description: CN224233 WLA054F10.ab1 WLbrain Gallus gallus cDNA 5', mRNA sequence; Next best Hit: CN218085(alignment length 15bp with 100.00%identity)	gb|XM_428938|tc|TC411737|tc|TC378140	SLC25A12	2.44233	0.0340035	PREDICTED: Gallus gallus similar to Solute carrier family 25 (mitochondrial carrier, Aralar), member 12 (LOC431387), mRNA [XM_428938]
gb|CR732878	CR732878	1.63391	0.00481052	Gallus gallus finished cDNA, clone ChEST564d8. [CR732878]		CO763966	1.42631	0.0341743	Target: CO763966; Description: CO763966 brain_EST07158 Brain cDNA Library Gallus gallus cDNA 5', mRNA sequence; Next best Hit: CO759754(alignment length 54bp with 96.30%identity)
ref|NM_001199108|ens|ENSGALT00000019886|gb|CR385835|gb|EF544591	SOCS4	2.50075	0.00481186	Gallus gallus suppressor of cytokine signaling 4 (SOCS4), mRNA [NM_001199108]	ens|ENSGALT00000006764|gb|CR405895	ENSGALT00000006764	3.0707	0.0342919	Uncharacterized protein [Source:UniProtKB/TrEMBL;Acc:E1BRB9] [ENSGALT00000006764]
ens|ENSGALT00000039183|gb|CR407517|tc|TC381977|ref|XM_417474	SNX21	1.12446	0.00481742	sorting nexin family member 21 [Source:HGNC Symbol;Acc:16154] [ENSGALT00000039183]	ens|ENSGALT00000037438|ens|ENSGALT00000021453|gb|XM_416416|tc|TC395638	PDE3A	1.79864	0.0343025	phosphodiesterase 3A, cGMP-inhibited [Source:HGNC Symbol;Acc:8778] [ENSGALT00000037438]
tc|TC413629|tc|TC388179	TC413629	4.03517	0.00482037	Unknown		CN223281	1.77333	0.0343294	Target: CN223281; Description: CN223281 WLA048C08.ab1 WLbrain Gallus gallus cDNA 5', mRNA sequence; Next best Hit: A_87_P065862(alignment length 14bp with 100.00%identity)
ens|ENSGALT00000023330|gb|XM_424174|tc|TC419015|tc|TC396371	CDC37L1	2.03199	0.00482127	cell division cycle 37 homolog (S. cerevisiae)-like 1 [Source:HGNC Symbol;Acc:17179] [ENSGALT00000023330]		CN218471	2.8271	0.0344455	Target: CN218471; Description: CN218471 RJA030H07.ab1 RJbrain Gallus gallus cDNA 5', mRNA sequence; Next best Hit: CN219630(alignment length 60bp with 100.00%identity)
ref|NM_001030719|ens|ENSGALT00000039675|gb|AJ721081|gb|CR390872	FLOT2	2.15777	0.00482296	Gallus gallus flotillin 2 (FLOT2), mRNA [NM_001030719]	ens|ENSGALT00000021712|gb|BX932252|gb|BX936048|gb|BX950437	BBOX1	2.4808	0.0346017	butyrobetaine (gamma), 2-oxoglutarate dioxygenase (gamma-butyrobetaine hydroxylase) 1 [Source:HGNC Symbol;Acc:964] [ENSGALT00000021712]
ens|ENSGALT00000013858|gb|CR407061|tc|TC382170|tc|TC383295	THOC2	1.88089	0.00483925	THO complex 2 [Source:HGNC Symbol;Acc:19073] [ENSGALT00000013858]		CN222208	1.10481	0.034649	Target: CN222208; Description: CN222208 RJA083D03.ab1 RJbrain Gallus gallus cDNA 5', mRNA sequence; Next best Hit: CN218571(alignment length 28bp with 92.86%identity)
ens|ENSGALT00000029851|ref|XM_003643855	ENSGALT00000029851	3.60143	0.00485542	PREDICTED: Gallus gallus uncharacterized LOC430011 (LOC430011), mRNA [XM_003643855]		CN225622	2.26958	0.0346845	Target: CN225622; Description: CN225622 WLA075A06.ab1 WLbrain Gallus gallus cDNA 5', mRNA sequence; Next best Hit: A_87_P206778(alignment length 50bp with 94.00%identity)
tc|NP9674039	NP9674039	2.08093	0.00485901	GB	ens|ENSGALT00000032503|gb|CR407197|tc|TC407623|ref|XR_140159	ENSGALT00000032503	4.25675	0.0346845	Uncharacterized protein [Source:UniProtKB/TrEMBL;Acc:E1C921] [ENSGALT00000032503]
tc|NP9677154	NP9677154	1.92729	0.00489055	GB	ref|NM_001001876|gb|AJ584653|tc|NP9668631|tc|TC373446	HSPG2	1.35993	0.0347702	Gallus gallus heparan sulfate proteoglycan 2 (HSPG2), mRNA [NM_001001876]
gb|CR390318|gb|BU421433	CR390318	2.52712	0.00490398	Gallus gallus finished cDNA, clone ChEST233c16. [CR390318]		CN218121	2.89475	0.0348046	Target: CN218121; Description: CN218121 RJA024D08.ab1 RJbrain Gallus gallus cDNA 5', mRNA sequence; Next best Hit: CN218471(alignment length 60bp with 98.33%identity)
gb|CR338923	CR338923	1.51252	0.00492153	Gallus gallus finished cDNA, clone ChEST979j24. [CR338923]		CN220738	1.21776	0.0349311	Target: CN220738; Description: CN220738 RJA069A06.ab1 RJbrain Gallus gallus cDNA 5', mRNA sequence; Next best Hit: CN223678(alignment length 18bp with 94.44%identity)
	CN216942	2.21642	0.00492767	Target: CN216942; Description: CN216942 RJA002G10.ab1 RJbrain Gallus gallus cDNA 5', mRNA sequence; Next best Hit: A_87_P078876(alignment length 17bp with 94.12%identity)	tc|NP9675550	NP9675550	1.1956	0.0351821	GB
ref|NM_204830|ens|ENSGALT00000017146|gb|AF176675|tc|TC387814	ELAVL4	2.24948	0.0049409	Gallus gallus ELAV (embryonic lethal, abnormal vision, Drosophila)-like 4 (Hu antigen D) (ELAVL4), mRNA [NM_204830]	gb|CR385371	CSTF1	1.53574	0.0352263	Gallus gallus finished cDNA, clone ChEST600e4. [CR385371]
gb|CR386181|ref|XM_003643488	CR386181	1.95413	0.00495251	Gallus gallus finished cDNA, clone ChEST9i3. [CR386181]		CN216866	1.63253	0.0353022	Target: CN216866; Description: CN216866 RJA001G07.ab1 RJbrain Gallus gallus cDNA 5', mRNA sequence; Next best Hit: CN220574(alignment length 18bp with 100.00%identity)
ens|ENSGALT00000019833	ENSGALT00000019833	5.76259	0.00495275	Unknown	gb|BX929329|gb|BX935844|tc|TC420989|ref|XM_414843	RPL3L	5.36587	0.0353039	Gallus gallus finished cDNA, clone ChEST982j14. [BX929329]
gb|CR407578|tc|TC378463	FNDC4	1.0966	0.00496002	Gallus gallus finished cDNA, clone ChEST584l16. [CR407578]	ens|ENSGALT00000037567	ENSGALT00000037567	1.56912	0.0353193	Uncharacterized protein [Source:UniProtKB/TrEMBL;Acc:F1NJX2] [ENSGALT00000037567]
gb|CR390636	CR390636	1.60907	0.00496248	Gallus gallus finished cDNA, clone ChEST353k13. [CR390636]		GT_EA606_A_87_P177488	1.7522	0.0353727	Unknown
ens|ENSGALT00000003869|ens|ENSGALT00000041102|gb|XM_001233947|tc|TC383436	ENSGALT00000003869	2.24073	0.00498102	ATP-binding cassette, sub-family A (ABC1), member 7 [Source:HGNC Symbol;Acc:37] [ENSGALT00000003869]	ens|ENSGALT00000040693|gb|CR389053|gb|J00911|tc|TC417313	ENSGALT00000040693	2.60249	0.0354333	tropomyosin 3 [Source:HGNC Symbol;Acc:12012] [ENSGALT00000040693]
tc|TC434550	TC434550	4.22939	0.00498564	Rep: LSM14 homolog A - Gallus gallus, partial (47%) [TC434550]		CO763509	3.94404	0.0354742	Target: CO763509; Description: CO763509 brain_EST06701 Brain cDNA Library Gallus gallus cDNA 5', mRNA sequence; Next best Hit: CO760255(alignment length 20bp with 100.00%identity)
	CN224899	3.26457	0.0050185	Target: CN224899; Description: CN224899 WLA063G09.ab1 WLbrain Gallus gallus cDNA 5', mRNA sequence; Next best Hit: CN223759(alignment length 15bp with 100.00%identity)	ens|ENSGALT00000003529	EIF2C1	1.3466	0.0356049	eukaryotic translation initiation factor 2C, 1 [Source:HGNC Symbol;Acc:3262] [ENSGALT00000003529]
ref|NM_001199453|ens|ENSGALT00000015678|gb|BX934533|gb|BX930221	THBS1	2.08917	0.00501974	Gallus gallus thrombospondin 1 (THBS1), mRNA [NM_001199453]		CN225444	4.92223	0.0356074	Target: CN225444; Description: CN225444 WLA072C04.ab1 WLbrain Gallus gallus cDNA 5', mRNA sequence; Next best Hit: CN220433(alignment length 16bp with 100.00%identity)
ens|ENSGALT00000029983	ENSGALT00000029983	1.62708	0.0050229	Uncharacterized protein [Source:UniProtKB/TrEMBL;Acc:F1NS32] [ENSGALT00000029983]	gb|BX935474|gb|BX933742	BX935474	1.59252	0.0357293	Gallus gallus finished cDNA, clone ChEST247d4. [BX935474]
	CN221570	6.45917	0.00503442	Target: CN221570; Description: CN221570 WLA032H03.ab1 WLbrain Gallus gallus cDNA 5', mRNA sequence; Next best Hit: CN235102(alignment length 13bp with 100.00%identity)	ens|ENSGALT00000009633|gb|BX931179|gb|BX931205|tc|TC392288	MGLL	1.29581	0.0357298	monoglyceride lipase [Source:HGNC Symbol;Acc:17038] [ENSGALT00000009633]
	CO761619	2.51023	0.00503797	Target: CO761619; Description: CO761619 brain_EST04811 Brain cDNA Library Gallus gallus cDNA 5', mRNA sequence; Next best Hit: A_87_P016849(alignment length 16bp with 100.00%identity)	ref|NM_204321|ens|ENSGALT00000000503|tc|TC376679|tc|TC419337	CRHR1	2.51823	0.0360579	Gallus gallus corticotropin releasing hormone receptor 1 (CRHR1), mRNA [NM_204321]
ens|ENSGALT00000034761|ens|ENSGALT00000002727|gb|U07644|gb|XM_413704	NEO1	1.70091	0.00504059	neogenin 1 [Source:HGNC Symbol;Acc:7754] [ENSGALT00000034761]	tc|NP9666399|ref|XM_001231736	NP9666399	1.66849	0.0361708	GB
ens|ENSGALT00000004172|gb|CR352990|gb|BU233763|tc|TC377282	FAM171B	1.58363	0.00505351	family with sequence similarity 171, member B [Source:HGNC Symbol;Acc:29412] [ENSGALT00000004172]	gb|CR352982|gb|CV860204|tc|TC388171	CR352982	3.07531	0.0361796	Gallus gallus finished cDNA, clone ChEST538k24. [CR352982]
	CO763047	1.58942	0.005056	Target: CO763047; Description: CO763047 brain_EST06239 Brain cDNA Library Gallus gallus cDNA 5', mRNA sequence; Next best Hit: CO763633(alignment length 55bp with 100.00%identity)	ens|ENSGALT00000022981|tc|TC413708|tc|TC421627|ref|XM_424101	USP36	1.34256	0.0362413	Uncharacterized protein [Source:UniProtKB/TrEMBL;Acc:F1NXA2] [ENSGALT00000022981]
	CN221596	2.31443	0.00505867	Target: CN221596; Description: CN221596 WLA033A06.ab1 WLbrain Gallus gallus cDNA 5', mRNA sequence; Next best Hit: A_87_P052211(alignment length 13bp with 100.00%identity)		CN224400	1.80565	0.0362733	Target: CN224400; Description: CN224400 RJA101A10.ab1 RJbrain Gallus gallus cDNA 5', mRNA sequence; Next best Hit: CN217077(alignment length 60bp with 93.33%identity)
	CN233949	1.56172	0.00506014	Target: CN233949; Description: CN233949 RJA120H12.ab1 RJbrain Gallus gallus cDNA 5', mRNA sequence; Next best Hit: A_87_P012535(alignment length 23bp with 100.00%identity)	ens|ENSGALT00000018524	ENSGALT00000018524	2.60574	0.0365696	Uncharacterized protein [Source:UniProtKB/TrEMBL;Acc:F1P4W8] [ENSGALT00000018524]
ref|NM_001031574|gb|AJ851524|tc|TC373833	LOC429451	1.60359	0.00506551	Gallus gallus mucosa associated lymphoid tissue lymphoma translocation gene 1-like (LOC429451), mRNA [NM_001031574]	ens|ENSGALT00000010164|gb|AY466164|tc|TC383347|ref|XM_418544	ACTR3B	1.69909	0.0365892	Uncharacterized protein [Source:UniProtKB/TrEMBL;Acc:F1NW48] [ENSGALT00000010164]
gb|CR388665|gb|BU316365	CR388665	1.0972	0.00507755	Gallus gallus finished cDNA, clone ChEST386m17. [CR388665]	ref|NM_001031123|ens|ENSGALT00000022631|ens|ENSGALT00000012527|gb|AJ851557	USP12P1	1.06853	0.0366156	Gallus gallus ubiquitin specific peptidase 12 pseudogene 1 (USP12P1), mRNA [NM_001031123]
gb|CR352434|tc|TC419789	CR352434	1.30839	0.00507991	Gallus gallus finished cDNA, clone ChEST320m1. [CR352434]	ref|NM_205290|ens|ENSGALT00000002980|ens|ENSGALT00000040248|gb|X59541	HSPB1	1.14153	0.0366724	Gallus gallus heat shock 27kDa protein 1 (HSPB1), mRNA [NM_205290]
ens|ENSGALT00000022597|gb|CR353813|tc|TC399588|tc|TC394071	FIP1L1	2.11809	0.00508532	FIP1 like 1 (S. cerevisiae) [Source:HGNC Symbol;Acc:19124] [ENSGALT00000022597]	ens|ENSGALT00000000763|gb|BX932661|gb|BX934929|gb|CR354022	LOC415859	2.0409	0.0367088	Uncharacterized protein [Source:UniProtKB/TrEMBL;Acc:E1C8H1] [ENSGALT00000000763]
ref|NM_001006399|ens|ENSGALT00000016004|ens|ENSGALT00000016003|gb|AJ719843	INTS7	1.52807	0.00509498	Gallus gallus integrator complex subunit 7 (INTS7), mRNA [NM_001006399]	gb|BX931368	BX931368	2.77278	0.0367828	Gallus gallus finished cDNA, clone ChEST650e20. [BX931368]
ref|NM_205518|gb|L08165|gb|CV861523|gb|CO635722	ACTB	1.26547	0.00509553	Gallus gallus actin, beta (ACTB), mRNA [NM_205518]	ens|ENSGALT00000026632|gb|CR407578|tc|TC378463|ref|XM_419991	ENSGALT00000026632	1.93017	0.0368551	fibronectin type III domain containing 4 [Source:HGNC Symbol;Acc:20239] [ENSGALT00000026632]
ref|NM_001030994|ens|ENSGALT00000019753|gb|AJ719837|tc|TC406643	ELMO1	1.749	0.00511398	Gallus gallus engulfment and cell motility 1 (ELMO1), mRNA [NM_001030994]	gb|CR388943|gb|CR387723|gb|CR387394|gb|CR387454	MGLL	1.06865	0.0368839	Gallus gallus finished cDNA, clone ChEST320e7. [CR388943]
ref|NM_204917|ens|ENSGALT00000017533|ens|ENSGALT00000031204|gb|CR387202	ETV1	2.66295	0.00511728	Gallus gallus ets variant 1 (ETV1), mRNA [NM_204917]	ens|ENSGALT00000013590|gb|BU423747|tc|TC431712|tc|TC383007	LMCD1	1.60444	0.0369889	LIM and cysteine-rich domains 1 [Source:HGNC Symbol;Acc:6633] [ENSGALT00000013590]
ens|ENSGALT00000040393|gb|AJ720486	ENSGALT00000040393	1.15434	0.00512086	coiled-coil domain containing 88A [Source:HGNC Symbol;Acc:25523] [ENSGALT00000040393]	ref|NM_001163327|ref|NM_001031322|ref|NM_001163326|ref|NM_001163325	MBNL1	1.34055	0.0371378	Gallus gallus muscleblind-like (Drosophila) (MBNL1), transcript variant 5, mRNA [NM_001163327]
ens|ENSGALT00000005036|gb|CR523822|gb|XM_415437|tc|TC381584	C17H9orf96	1.90783	0.00512816	chromosome 9 open reading frame 96 [Source:HGNC Symbol;Acc:28669] [ENSGALT00000005036]	ens|ENSGALT00000040757	ENSGALT00000040757	2.46422	0.037176	Uncharacterized protein [Source:UniProtKB/TrEMBL;Acc:F1NMX5] [ENSGALT00000040757]
	CD214519	2.15754	0.0051323	Target: CD214519; Description: CD214519 pgl1c.pk002.e20 Chicken liver cDNA library Gallus gallus cDNA clone pgl1c.pk002.e20 ; Next best Hit: CN221453(alignment length 15bp with 100.00%identity)		CO762676	1.56172	0.037194	Target: CO762676; Description: CO762676 brain_EST05868 Brain cDNA Library Gallus gallus cDNA 5', mRNA sequence; Next best Hit: A_87_P085441(alignment length 14bp with 100.00%identity)
gb|CR386035	CR386035	1.94683	0.00513751	Gallus gallus finished cDNA, clone ChEST218i4. [CR386035]	ref|NM_001005616|ens|ENSGALT00000015928|ens|ENSGALT00000015927|gb|U46563	PROX1	1.84463	0.0372031	Gallus gallus prospero homeobox 1 (PROX1), mRNA [NM_001005616]
	CN220070	1.99583	0.00513789	Target: CN220070; Description: CN220070 WLA012G10.ab1 WLbrain Gallus gallus cDNA 5', mRNA sequence; Next best Hit: A_87_P130918(alignment length 17bp with 100.00%identity)		CN220308	1.35256	0.0372345	Target: CN220308; Description: CN220308 WLA015A11.ab1 WLbrain Gallus gallus cDNA 5', mRNA sequence; Next best Hit: CN225394(alignment length 38bp with 100.00%identity)
	CN223375	2.88659	0.00513866	Target: CN223375; Description: CN223375 WLA049A02.ab1 WLbrain Gallus gallus cDNA 5', mRNA sequence; Next best Hit: CO759105(alignment length 15bp with 100.00%identity)	ens|ENSGALT00000003772|ens|ENSGALT00000041164|tc|TC394623|ref|XM_421507	ENSGALT00000003772	1.51073	0.0372605	Uncharacterized protein [Source:UniProtKB/TrEMBL;Acc:F1NKE0] [ENSGALT00000003772]
ens|ENSGALT00000013724|gb|XR_026723|tc|TC427235|tc|TC422196	ENSGALT00000013724	1.89591	0.00515267	microtubule-associated protein 1A [Source:HGNC Symbol;Acc:6835] [ENSGALT00000013724]	gb|BX929656	BX929656	2.20255	0.0375349	Gallus gallus finished cDNA, clone ChEST793c3. [BX929656]
	GT_EA606_A_87_P305333	2.81971	0.00515358	Unknown	ens|ENSGALT00000015106|gb|BX931913|gb|CR338694|tc|TC403086	ATP5G3	1.19614	0.0376141	Uncharacterized protein [Source:UniProtKB/TrEMBL;Acc:E1BV48] [ENSGALT00000015106]
	W66540	3.20668	0.0051593	Target: W66540; Description: W66540 EST059 chicken liver cDNA library, Stratagene (cat.#935402) Gallus gallus cDNA clone CLEST090 similar to PurH=5-aminoimidazole-4-carboxamide-ribonucleotide transformylase-IMP cyclohydrolase [chicken], mRNA sequence; Nex	ens|ENSGALT00000005825|tc|TC426352	ENSGALT00000005825	1.3489	0.0376229	Uncharacterized protein [Source:UniProtKB/TrEMBL;Acc:E1C2U5] [ENSGALT00000005825]
ens|ENSGALT00000001955|gb|BX929397|tc|TC437884	ENSGALT00000001955	2.08253	0.00517637	zinc finger protein 652 [Source:HGNC Symbol;Acc:29147] [ENSGALT00000001955]	gb|CR406019|tc|TC398095|ref|XM_414477	LOC416146	1.57023	0.0377073	Gallus gallus finished cDNA, clone ChEST605j16. [CR406019]
	CD214381	3.40411	0.00518299	Target: CD214381; Description: CD214381 pgl1n.pk011.d21 Normalized chicken liver cDNA library (pgl1n) Gallus gallus cDNA clone pgl1n.pk011.d21 ; Next best Hit: CN219131(alignment length 17bp with 100.00%identity)		CN234036	1.19525	0.0378385	Target: CN234036; Description: CN234036 WLA085C10.ab1 WLbrain Gallus gallus cDNA 5', mRNA sequence; Next best Hit: CO761479(alignment length 15bp with 100.00%identity)
	CN224183	1.09614	0.00519051	Target: CN224183; Description: CN224183 RJA099F09.ab1 RJbrain Gallus gallus cDNA 5', mRNA sequence; Next best Hit: CO762833(alignment length 14bp with 100.00%identity)	gb|AJ851731|tc|TC375285	SUCLA2	1.67413	0.0378465	Gallus gallus mRNA for hypothetical protein, clone 22i13. [AJ851731]
	CO761350	1.66586	0.00519147	Target: CO761350; Description: CO761350 brain_EST04542 Brain cDNA Library Gallus gallus cDNA 5', mRNA sequence; Next best Hit: CO762901(alignment length 55bp with 100.00%identity)	ref|NM_204195|ens|ENSGALT00000011718|gb|U12467|gb|AB011803	SOX3	3.28522	0.0379819	Gallus gallus SRY (sex determining region Y)-box 3 (SOX3), mRNA [NM_204195]
gb|CR387882	CR387882	1.21096	0.00519406	Gallus gallus finished cDNA, clone ChEST329l13. [CR387882]	gb|DR419542|tc|TC433436|tc|TC421614|tc|TC383675	DR419542	1.73085	0.038053	gPGC_EST09384 Embryonic gonadal PGC cDNA Library Gallus gallus cDNA 5', mRNA sequence [DR419542]
gb|CR353839|gb|BU434571	CR353839	3.83855	0.00519444	Gallus gallus finished cDNA, clone ChEST239g9. [CR353839]	gb|AJ301881	AJ301881	2.63752	0.0381393	Gallus gallus partial mRNA for heat shock protein 70 (hsp70 gene), 5'UTR, clone HS-200. [AJ301881]
ens|ENSGALT00000017542|ens|ENSGALT00000037946|gb|XM_001235515|tc|TC397378	DGKB	1.3741	0.00519819	diacylglycerol kinase, beta 90kDa [Source:HGNC Symbol;Acc:2850] [ENSGALT00000017542]	ref|NM_204454|ens|ENSGALT00000009078|gb|AJ557031|tc|TC381561	CRHR2	1.54539	0.0382005	Gallus gallus corticotropin releasing hormone receptor 2 (CRHR2), mRNA [NM_204454]
ens|ENSGALT00000022620|gb|CR385783|tc|TC377098|ref|XM_419138	ENSGALT00000022620	2.54817	0.00520055	piezo-type mechanosensitive ion channel component 2 [Source:HGNC Symbol;Acc:26270] [ENSGALT00000022620]	ref|NM_001030778|gb|AJ719306|tc|TC374020	NAA50	1.37497	0.038236	Gallus gallus N(alpha)-acetyltransferase 50, NatE catalytic subunit (NAA50), mRNA [NM_001030778]
ref|NM_204117|ens|ENSGALT00000037781|ens|ENSGALT00000024876|gb|L11264	NRG1	1.27058	0.00522478	Gallus gallus neuregulin 1 (NRG1), mRNA [NM_204117]		CN233220	1.73217	0.0382578	Target: CN233220; Description: CN233220 RJA107H07.ab1 RJbrain Gallus gallus cDNA 5', mRNA sequence; Next best Hit: CN219158(alignment length 14bp with 100.00%identity)
gb|XM_417659|tc|TC433358|tc|TC383407	CCDC30	1.09012	0.00522537	PREDICTED: Gallus gallus similar to Phosphopantothenoylcysteine synthetase (LOC419508), mRNA [XM_417659]	ens|ENSGALT00000037844|gb|DR419728|tc|TC401493|tc|TC433195	CYCS	1.59383	0.0382815	Cytochrome c [Source:UniProtKB/Swiss-Prot;Acc:P67881] [ENSGALT00000037844]
ens|ENSGALT00000024201|tc|NP9669649|ref|XM_429153	ZNF366	2.98901	0.00524059	zinc finger protein 366 [Source:HGNC Symbol;Acc:18316] [ENSGALT00000024201]	ref|NM_205114|gb|D85105|gb|BX935200|tc|TC387477	LOC396009	2.2598	0.0384951	Gallus gallus slow muscle troponin T (LOC396009), mRNA [NM_205114]
gb|CR733202|gb|CR390680|tc|TC379811|ref|XR_026752	STAMBP	1.94518	0.00524855	Gallus gallus finished cDNA, clone ChEST772k5. [CR733202]		CO762903	1.43207	0.0385243	Target: CO762903; Description: CO762903 brain_EST06095 Brain cDNA Library Gallus gallus cDNA 5', mRNA sequence; Next best Hit: CN218534(alignment length 15bp with 100.00%identity)
ref|NM_001031080|ens|ENSGALT00000037221|ens|ENSGALT00000024970|gb|AJ719591	PNISR	1.73196	0.00525346	Gallus gallus PNN-interacting serine/arginine-rich protein (PNISR), mRNA [NM_001031080]	gb|CR523987|gb|CF251093	FRAS1	1.39922	0.0385677	Gallus gallus finished cDNA, clone ChEST707g6. [CR523987]
gb|XM_422073|tc|TC383903	TMEM169	1.24569	0.00525458	PREDICTED: Gallus gallus similar to MGC81142 protein (LOC424223), mRNA [XM_422073]	ens|ENSGALT00000006087|ens|ENSGALT00000034610|tc|TC402101|ref|XM_003642176	ATP2A2	2.53284	0.038584	Sarcoplasmic/endoplasmic reticulum calcium ATPase 2 [Source:UniProtKB/Swiss-Prot;Acc:Q03669] [ENSGALT00000006087]
ens|ENSGALT00000011704|gb|XM_420265|gb|CO423563|tc|TC381650	CLCN5	1.31459	0.00525604	chloride channel 5 [Source:HGNC Symbol;Acc:2023] [ENSGALT00000011704]	ens|ENSGALT00000009918|ens|ENSGALT00000031281|ens|ENSGALT00000009923|gb|XM_001232786	SCN5A	2.72616	0.0385985	Uncharacterized protein [Source:UniProtKB/TrEMBL;Acc:F1N8I1] [ENSGALT00000009918]
tc|NP9665406	NP9665406	2.35092	0.005269	GB	gb|XM_418909|tc|TC385071	ALDH5A1	1.52925	0.0386045	PREDICTED: Gallus gallus similar to succinic semialdehyde dehydrogenase (LOC420818), mRNA [XM_418909]
	CN218724	3.18332	0.00526948	Target: CN218724; Description: CN218724 RJA037H10.ab1 RJbrain Gallus gallus cDNA 5', mRNA sequence; Next best Hit: A_87_P072361(alignment length 14bp with 100.00%identity)		CN222868	2.43709	0.0386569	Target: CN222868; Description: CN222868 WLA043G08.ab1 WLbrain Gallus gallus cDNA 5', mRNA sequence; Next best Hit: A_87_P018410(alignment length 50bp with 92.00%identity)
	CN218496	2.93166	0.00532058	Target: CN218496; Description: CN218496 RJA031C11.ab1 RJbrain Gallus gallus cDNA 5', mRNA sequence; Next best Hit: A_87_P024435(alignment length 16bp with 100.00%identity)	ens|ENSGALT00000035098|tc|TC384268|ref|XM_001232848	ENSGALT00000035098	2.58238	0.0387001	Uncharacterized protein [Source:UniProtKB/TrEMBL;Acc:E1BYK9] [ENSGALT00000035098]
gb|M28660|tc|TC414298	COL9A2	2.94427	0.00532498	Chicken cartilage alpha-1(IX) collagen-proteoglycan mRNA, 5' end, clone YM43. [M28660]	gb|BX936110	BX936110	1.76932	0.038717	Gallus gallus finished cDNA, clone ChEST485m4. [BX936110]
ref|NM_001039305|ens|ENSGALT00000012472|gb|AJ851715|gb|CR733323	MGEA5	1.31653	0.00532727	Gallus gallus meningioma expressed antigen 5 (hyaluronidase) (MGEA5), mRNA [NM_001039305]		BG641702	1.41684	0.0387832	Target: BG641702; Description: BG641702 pgl1c.pk001.n10 Chicken liver cDNA library Gallus gallus cDNA clone pgl1c.pk001.n10 ; Next best Hit: A_87_P086336(alignment length 53bp with 100.00%identity)
gb|CR385861|tc|TC429504	CR385861	2.16566	0.00533931	Gallus gallus finished cDNA, clone ChEST201g7. [CR385861]	gb|CR523264|gb|BX950645|gb|XM_415893|tc|TC378577	CA4	1.42764	0.0388118	Gallus gallus finished cDNA, clone ChEST520m7. [CR523264]
ens|ENSGALT00000020413|gb|BX935791|gb|BX929473|gb|BX931461	ENSGALT00000020413	3.07812	0.00534013	Uncharacterized protein [Source:UniProtKB/TrEMBL;Acc:F1NDK9] [ENSGALT00000020413]	gb|CR387465	CR387465	1.61363	0.0388624	Gallus gallus finished cDNA, clone ChEST486p12. [CR387465]
ens|ENSGALT00000006032	OTUD7A	2.45254	0.00534331	Uncharacterized protein [Source:UniProtKB/TrEMBL;Acc:E1C900] [ENSGALT00000006032]	ref|NM_001006578|gb|AJ851622|tc|TC425645|tc|TC413365	OXCT1	1.30177	0.0389304	Gallus gallus 3-oxoacid CoA transferase 1 (OXCT1), nuclear gene encoding mitochondrial protein, mRNA [NM_001006578]
gb|CR385348|tc|TC433038	CR385348	1.57725	0.00540615	Gallus gallus finished cDNA, clone ChEST411a13. [CR385348]	gb|CR523052	CR523052	1.47751	0.0390767	Gallus gallus finished cDNA, clone ChEST563f20. [CR523052]
gb|CR523663	CR523663	2.06722	0.00540627	Gallus gallus finished cDNA, clone ChEST824m15. [CR523663]		CO759605	4.63118	0.03909	Target: CO759605; Description: CO759605 brain_EST02797 Brain cDNA Library Gallus gallus cDNA 5', mRNA sequence; Next best Hit: CO764208(alignment length 35bp with 94.29%identity)
gb|CR389587|tc|TC434136	CR389587	2.35838	0.00542811	Gallus gallus finished cDNA, clone ChEST865o8. [CR389587]	ens|ENSGALT00000040534|gb|AJ851703|tc|TC373987	BUB1B	1.15935	0.0391813	BUB1 budding uninhibited by benzimidazoles 1 homolog beta [Source:RefSeq peptide;Acc:NP_989734] [ENSGALT00000040534]
	CN222629	2.20145	0.00543781	Target: CN222629; Description: CN222629 WLA042B08.ab1 WLbrain Gallus gallus cDNA 5', mRNA sequence; Next best Hit: CN224549(alignment length 17bp with 100.00%identity)	ens|ENSGALT00000008758|gb|BX929329|gb|BX935844|tc|TC420989	RPL3L	4.96988	0.0391904	Uncharacterized protein [Source:UniProtKB/TrEMBL;Acc:F1P5V2] [ENSGALT00000008758]
ens|ENSGALT00000006741|gb|CR407363|gb|BX950695|tc|TC441530	ENSGALT00000006741	2.01949	0.00544065	TNF receptor-associated factor 3 interacting protein 1 [Source:HGNC Symbol;Acc:17861] [ENSGALT00000006741]	ens|ENSGALT00000020402|gb|BX930303	KLHL28	1.18023	0.0392058	kelch-like 28 (Drosophila) [Source:HGNC Symbol;Acc:19741] [ENSGALT00000020402]
ens|ENSGALT00000001131	SMPD3	4.16292	0.00548185	sphingomyelin phosphodiesterase 3, neutral membrane (neutral sphingomyelinase II) [Source:HGNC Symbol;Acc:14240] [ENSGALT00000001131]	ens|ENSGALT00000010099|tc|NP9673964|tc|TC412579|tc|TC436549	LOC770265	1.41729	0.0393139	Uncharacterized protein [Source:UniProtKB/TrEMBL;Acc:E1BYR6] [ENSGALT00000010099]
ens|ENSGALT00000005059	ENSGALT00000005059	1.2718	0.00548927	hypothetical protein LOC425111 [Source:RefSeq peptide;Acc:NP_001026501] [ENSGALT00000005059]		CN218828	2.02872	0.0393351	Target: CN218828; Description: CN218828 RJA040B10.ab1 RJbrain Gallus gallus cDNA 5', mRNA sequence; Next best Hit: CN220512(alignment length 61bp with 98.36%identity)
	CN218029	4.21625	0.00549268	Target: CN218029; Description: CN218029 RJA022G02.ab1 RJbrain Gallus gallus cDNA 5', mRNA sequence; Next best Hit: CN233286(alignment length 14bp with 100.00%identity)	tc|NP9679459|tc|NP9679455|tc|TC442340|tc|TC386720	NP9679459	1.12032	0.0394	GB
ens|ENSGALT00000040766	ENSGALT00000040766	3.63583	0.00550564	Uncharacterized protein [Source:UniProtKB/TrEMBL;Acc:F1NMW2] [ENSGALT00000040766]	ens|ENSGALT00000019311|gb|CR388466|gb|DR417253|tc|TC403326	ENSGALT00000019311	1.73118	0.0394544	nudix (nucleoside diphosphate linked moiety X)-type motif 6 [Source:HGNC Symbol;Acc:8053] [ENSGALT00000019311]
ens|ENSGALT00000005159	DNAAF1	2.364	0.00551661	dynein, axonemal, assembly factor 1 [Source:HGNC Symbol;Acc:30539] [ENSGALT00000005159]	ref|NM_001030925|ens|ENSGALT00000036075|gb|AJ720063|gb|BU460714	FTSJ3	1.29761	0.0395652	Gallus gallus FtsJ homolog 3 (E. coli) (FTSJ3), mRNA [NM_001030925]
ens|ENSGALT00000010275|ens|ENSGALT00000036242|gb|CR354014|gb|XM_414379	XPC	3.08749	0.00552022	xeroderma pigmentosum, complementation group C [Source:HGNC Symbol;Acc:12816] [ENSGALT00000010275]		CO760111	1.45977	0.0396355	Target: CO760111; Description: CO760111 brain_EST03303 Brain cDNA Library Gallus gallus cDNA 5', mRNA sequence; Next best Hit: CO762870(alignment length 60bp with 100.00%identity)
ref|NM_205192|gb|U47276|tc|TC375605	FOXD1	1.25299	0.00552139	Gallus gallus forkhead box D1 (FOXD1), mRNA [NM_205192]	ens|ENSGALT00000000890	ENSGALT00000000890	1.91927	0.0400575	Uncharacterized protein [Source:UniProtKB/TrEMBL;Acc:F1NUN0] [ENSGALT00000000890]
ens|ENSGALT00000027525|gb|CR406772|gb|CR385439|tc|TC401251	LHFP	2.61482	0.00553546	lipoma HMGIC fusion partner [Source:HGNC Symbol;Acc:6586] [ENSGALT00000027525]	ens|ENSGALT00000039313|ens|ENSGALT00000034610|gb|M66385|gb|XM_415130	ATP2A2	2.40635	0.0400932	Sarcoplasmic/endoplasmic reticulum calcium ATPase 2 [Source:UniProtKB/Swiss-Prot;Acc:Q03669] [ENSGALT00000039313]
	CN223252	2.21576	0.00553905	Target: CN223252; Description: CN223252 RJA092D10.ab1 RJbrain Gallus gallus cDNA 5', mRNA sequence; Next best Hit: BG641687(alignment length 14bp with 100.00%identity)		CN221296	1.62597	0.0402423	Target: CN221296; Description: CN221296 WLA030H04.ab1 WLbrain Gallus gallus cDNA 5', mRNA sequence; Next best Hit: CN223327(alignment length 62bp with 91.94%identity)
ens|ENSGALT00000013737|tc|TC400937	SMARCA1	2.03976	0.00554971	SWI/SNF related, matrix associated, actin dependent regulator of chromatin, subfamily a, member 1 [Source:HGNC Symbol;Acc:11097] [ENSGALT00000013737]	gb|CR391551|tc|TC409602	CR391551	4.2218	0.0402825	Gallus gallus finished cDNA, clone ChEST802d6. [CR391551]
	CN217178	1.11442	0.005551	Target: CN217178; Description: CN217178 RJA006E06.ab1 RJbrain Gallus gallus cDNA 5', mRNA sequence; Next best Hit: CN221939(alignment length 60bp with 100.00%identity)	tc|TC382098|ref|XM_426247	TC382098	1.37212	0.0403002	Rep: Methionyl-tRNA synthetase, mitochondrial precursor (EC 6.1.1.10) (Methionine--tRNA ligase 2) (Mitochondrial methionine--tRNA ligase) (MtMetRS). - Gallus gallus, complete [TC382098]
gb|XM_422144|tc|TC382103	SPOPL	2.62135	0.00557917	PREDICTED: Gallus gallus hypothetical LOC424299 (LOC424299), mRNA [XM_422144]		CN224496	2.95046	0.0404324	Target: CN224496; Description: CN224496 RJA101F11.ab1 RJbrain Gallus gallus cDNA 5', mRNA sequence; Next best Hit: A_87_P033789(alignment length 13bp with 100.00%identity)
tc|NP9665238	NP9665238	1.98993	0.00558069	GB		CN223752	1.80954	0.0404451	Target: CN223752; Description: CN223752 WLA051D05.ab1 WLbrain Gallus gallus cDNA 5', mRNA sequence; Next best Hit: CN220512(alignment length 58bp with 91.38%identity)
ens|ENSGALT00000037881|ens|ENSGALT00000017461|gb|BX930986|gb|AJ720375	CEP170	2.11251	0.00558305	centrosomal protein 170kDa [Source:HGNC Symbol;Acc:28920] [ENSGALT00000037881]	gb|CR386659|gb|BU125891|tc|TC385205|ref|XM_001232865	HINT3	1.25235	0.0404857	Gallus gallus finished cDNA, clone ChEST190k18. [CR386659]
ref|NM_001012856|ens|ENSGALT00000037987|ens|ENSGALT00000017434|gb|CR385690	PHF14	1.32324	0.00561529	Gallus gallus PHD finger protein 14 (PHF14), mRNA [NM_001012856]		CN218343	2.08441	0.040769	Target: CN218343; Description: CN218343 RJA028F11.ab1 RJbrain Gallus gallus cDNA 5', mRNA sequence; Next best Hit: CN216835(alignment length 57bp with 92.98%identity)
	CN221746	1.28328	0.00562406	Target: CN221746; Description: CN221746 RJA079G08.ab1 RJbrain Gallus gallus cDNA 5', mRNA sequence; Next best Hit: CN216863(alignment length 14bp with 100.00%identity)		CN216893	1.26004	0.0407731	Target: CN216893; Description: CN216893 RJA002B07.ab1 RJbrain Gallus gallus cDNA 5', mRNA sequence; Next best Hit: CN218031(alignment length 60bp with 100.00%identity)
ens|ENSGALT00000023611|tc|NP9669469|ref|XM_424697	POLR3G	1.30317	0.00562738	polymerase (RNA) III (DNA directed) polypeptide G (32kD) [Source:HGNC Symbol;Acc:30075] [ENSGALT00000023611]		CN222754	1.57708	0.0409636	Target: CN222754; Description: CN222754 WLA043A03.ab1 WLbrain Gallus gallus cDNA 5', mRNA sequence; Next best Hit: A_87_P031874(alignment length 16bp with 100.00%identity)
ref|NM_205502|ens|ENSGALT00000039640|ens|ENSGALT00000039641|ens|ENSGALT00000006426	CRYBA1	1.46981	0.0056385	Gallus gallus crystallin, beta A1 (CRYBA1), mRNA [NM_205502]		GT_EA606_A_87_P155643	1.37135	0.0410152	Unknown
ens|ENSGALT00000017933|ens|ENSGALT00000017931|ens|ENSGALT00000017809	SCN2A	3.21323	0.0056463	Uncharacterized protein [Source:UniProtKB/TrEMBL;Acc:E1BQT2] [ENSGALT00000017933]	ens|ENSGALT00000009265|ens|ENSGALT00000035113|gb|BX931326|gb|AF075706	ETV5	1.23394	0.0411341	Uncharacterized protein [Source:UniProtKB/TrEMBL;Acc:F1NEG9] [ENSGALT00000009265]
gb|CR388694|tc|TC427607|tc|TC440355	CR388694	2.86442	0.00566468	Gallus gallus finished cDNA, clone ChEST884e18. [CR388694]		CN220443	1.4578	0.0412772	Target: CN220443; Description: CN220443 WLA016A06.ab1 WLbrain Gallus gallus cDNA 5', mRNA sequence; Next best Hit: CN222833(alignment length 60bp with 96.67%identity)
gb|CR406585|tc|TC401538	CR406585	1.9717	0.00568365	Gallus gallus finished cDNA, clone ChEST658l18. [CR406585]	ref|NM_001030660|ens|ENSGALT00000039226|gb|AJ720012|tc|TC375247	RHOF	1.44098	0.0413498	Gallus gallus ras homolog family member F (in filopodia) (RHOF), mRNA [NM_001030660]
	CO759479	2.25659	0.00568419	Target: CO759479; Description: CO759479 brain_EST02671 Brain cDNA Library Gallus gallus cDNA 5', mRNA sequence; Next best Hit: CO763830(alignment length 60bp with 100.00%identity)	gb|XM_414892|tc|TC387780|tc|TC439946|tc|TC407031	LOC416592	1.40468	0.0413683	PREDICTED: Gallus gallus similar to LOC283951 protein (LOC416592), mRNA [XM_414892]
	CN223042	1.73709	0.00569922	Target: CN223042; Description: CN223042 WLA045E04.ab1 WLbrain Gallus gallus cDNA 5', mRNA sequence; Next best Hit: CN223040(alignment length 53bp with 100.00%identity)		CN217609	1.56161	0.0414156	Target: CN217609; Description: CN217609 RJA015D02.ab1 RJbrain Gallus gallus cDNA 5', mRNA sequence; Next best Hit: CN218104(alignment length 60bp with 100.00%identity)
ens|ENSGALT00000024062|ens|ENSGALT00000037282	ENSGALT00000024062	2.59806	0.00571303	Uncharacterized protein [Source:UniProtKB/TrEMBL;Acc:F1NMU9] [ENSGALT00000024062]	gb|XM_424554|tc|TC418068	LRG1	2.39691	0.0414496	PREDICTED: Gallus gallus similar to MGC53750 protein (LOC426943), partial mRNA [XM_424554]
ens|ENSGALT00000006172|gb|CR406382	ERCC6L	2.30028	0.00571952	excision repair cross-complementing rodent repair deficiency, complementation group 6-like [Source:HGNC Symbol;Acc:20794] [ENSGALT00000006172]	ens|ENSGALT00000037777|ens|ENSGALT00000017998|gb|CO760311|gb|BU118516	ENSGALT00000037777	1.38698	0.041695	egl nine homolog 1 (C. elegans) [Source:HGNC Symbol;Acc:1232] [ENSGALT00000037777]
ens|ENSGALT00000019924|tc|TC438907|tc|TC414271	KBTBD2	1.80776	0.00572522	kelch repeat and BTB (POZ) domain containing 2 [Source:HGNC Symbol;Acc:21751] [ENSGALT00000019924]	ref|NM_205114|gb|D85105|gb|BX935200|tc|TC377989	LOC396009	2.09234	0.0417409	Gallus gallus slow muscle troponin T (LOC396009), mRNA [NM_205114]
ref|NM_001031102|ens|ENSGALT00000026959|ens|ENSGALT00000036693|gb|AJ720674	SUPT3H	2.74712	0.00575595	Gallus gallus suppressor of Ty 3 homolog (S. cerevisiae) (SUPT3H), mRNA [NM_001031102]	ref|NM_204497|ens|ENSGALT00000013106|ens|ENSGALT00000033579|ens|ENSGALT00000035032	NF2	1.33623	0.0419346	Gallus gallus neurofibromin 2 (bilateral acoustic neuroma) (NF2), mRNA [NM_204497]
ens|ENSGALT00000040113|ens|ENSGALT00000003051|gb|EF520347|gb|XM_425051	BRUNOL6	1.78175	0.00577416	CUGBP, Elav-like family member 6 [Source:HGNC Symbol;Acc:14059] [ENSGALT00000040113]		CN222170	1.87435	0.0419463	Target: CN222170; Description: CN222170 WLA039C07.ab1 WLbrain Gallus gallus cDNA 5', mRNA sequence; Next best Hit: A_87_P125598(alignment length 14bp with 100.00%identity)
	CN225944	1.45973	0.00578092	Target: CN225944; Description: CN225944 WLA081F06.ab1 WLbrain Gallus gallus cDNA 5', mRNA sequence; Next best Hit: A_87_P025610(alignment length 14bp with 100.00%identity)	ens|ENSGALT00000012179|ens|ENSGALT00000032672|ens|ENSGALT00000012172|gb|XM_421068	ENSGALT00000012179	3.36633	0.0419655	Uncharacterized protein [Source:UniProtKB/TrEMBL;Acc:E1C1S2] [ENSGALT00000012179]
	CN236133	2.35506	0.00579248	Target: CN236133; Description: CN236133 WLA110A11.ab1 WLbrain Gallus gallus cDNA 5', mRNA sequence; Next best Hit: A_87_P053396(alignment length 13bp with 100.00%identity)	gb|CR391467	CR391467	1.80187	0.0421143	Gallus gallus finished cDNA, clone ChEST761b10. [CR391467]
ens|ENSGALT00000022498|gb|CR406779|tc|TC383183|ref|XM_423954	ENSGALT00000022498	1.31256	0.00579678	mitogen-activated protein kinase 15 [Source:HGNC Symbol;Acc:24667] [ENSGALT00000022498]	ref|NM_001030764|ens|ENSGALT00000020835|gb|CR389281|gb|AJ721079	CHPT1	1.28017	0.0421953	Gallus gallus choline phosphotransferase 1 (CHPT1), mRNA [NM_001030764]
ref|NM_204922|ens|ENSGALT00000039201|ens|ENSGALT00000010620|ens|ENSGALT00000039195	TNNT3	1.60923	0.00581572	Gallus gallus troponin T type 3 (skeletal, fast) (TNNT3), mRNA [NM_204922]	tc|NP9679447	NP9679447	1.71546	0.0422288	GB
	CN216994	1.84372	0.00582337	Target: CN216994; Description: CN216994 RJA003F04.ab1 RJbrain Gallus gallus cDNA 5', mRNA sequence; Next best Hit: CN234044(alignment length 14bp with 100.00%identity)	gb|CR389455|gb|CO504767	CR389455	2.21401	0.0423141	Gallus gallus finished cDNA, clone ChEST991k7. [CR389455]
gb|BX932594	BX932594	1.30053	0.00582749	Gallus gallus finished cDNA, clone ChEST119j20. [BX932594]		CN223299	2.88906	0.0425355	Target: CN223299; Description: CN223299 RJA092G12.ab1 RJbrain Gallus gallus cDNA 5', mRNA sequence; Next best Hit: CN222831(alignment length 14bp with 100.00%identity)
ens|ENSGALT00000039502|ens|ENSGALT00000039503	UBC	5.02143	0.00583725	Uncharacterized protein [Source:UniProtKB/TrEMBL;Acc:E1BRM2] [ENSGALT00000039502]	gb|CR353220	CR353220	2.15766	0.0425485	Gallus gallus finished cDNA, clone ChEST51j16. [CR353220]
	CN222162	3.40729	0.00584604	Target: CN222162; Description: CN222162 RJA082H08.ab1 RJbrain Gallus gallus cDNA 5', mRNA sequence; Next best Hit: CO759232(alignment length 16bp with 100.00%identity)	ref|NM_001167744|ens|ENSGALT00000032786|ens|ENSGALT00000025156|gb|M18866	CKMT2	2.78888	0.0426026	Gallus gallus creatine kinase, mitochondrial 2 (sarcomeric) (CKMT2), nuclear gene encoding mitochondrial protein, mRNA [NM_001167744]
tc|NP9665472	NP9665472	2.21775	0.00584745	GB		CO761402	2.16331	0.042631	Target: CO761402; Description: CO761402 brain_EST04594 Brain cDNA Library Gallus gallus cDNA 5', mRNA sequence; Next best Hit: CO759873(alignment length 19bp with 94.74%identity)
ens|ENSGALT00000009049|gb|XM_413819|tc|TC421147|tc|TC378943	ENSGALT00000009049	1.70785	0.00585318	centrosomal protein 152kDa [Source:HGNC Symbol;Acc:29298] [ENSGALT00000009049]	ref|NM_205256|ens|ENSGALT00000040173|ens|ENSGALT00000012101|gb|X55348	TFRC	2.06376	0.0426555	Gallus gallus transferrin receptor (p90, CD71) (TFRC), mRNA [NM_205256]
ref|NM_001199657|ens|ENSGALT00000013933|gb|CR353131|tc|TC396423	INO80	2.31127	0.00585766	Gallus gallus INO80 homolog (S. cerevisiae) (INO80), mRNA [NM_001199657]	gb|CR388736|tc|TC437074	CR388736	1.42487	0.0426677	Gallus gallus finished cDNA, clone ChEST876g24. [CR388736]
gb|L48894	L48894	2.60141	0.00586004	Gallus gallus clone cDNA42AR1. [L48894]	gb|CR354370|ref|XM_418849	LSM5	1.25638	0.0427697	Gallus gallus finished cDNA, clone ChEST536e2. [CR354370]
ens|ENSGALT00000007651|gb|BX930607|gb|BX931423|ref|XM_421598	H2AFY2	1.54559	0.00586884	Histone H2A [Source:UniProtKB/TrEMBL;Acc:E1BR08] [ENSGALT00000007651]	ref|NM_001097537|gb|AM492777|gb|CR388696|tc|TC376752	TNFRSF13B	1.22627	0.0428449	Gallus gallus tumor necrosis factor receptor superfamily, member 13B (TNFRSF13B), mRNA [NM_001097537]
	CN217307	1.66061	0.00589636	Target: CN217307; Description: CN217307 RJA008D07.ab1 RJbrain Gallus gallus cDNA 5', mRNA sequence; Next best Hit: CN217867(alignment length 60bp with 100.00%identity)	ens|ENSGALT00000005690|gb|BX933252|gb|BX934483|gb|BX936084	AK2	1.24664	0.042914	Uncharacterized protein [Source:UniProtKB/TrEMBL;Acc:F1NJ73] [ENSGALT00000005690]
ens|ENSGALT00000001514|gb|XM_415382|tc|TC434159|tc|TC399236	GOLGA1	2.43616	0.00589742	golgin A1 [Source:HGNC Symbol;Acc:4424] [ENSGALT00000001514]	ref|NM_204816|ens|ENSGALT00000015138|ens|ENSGALT00000022743|gb|AJ250359	CHRNA1	2.15036	0.0429754	Gallus gallus cholinergic receptor, nicotinic, alpha 1 (muscle) (CHRNA1), mRNA [NM_204816]
ens|ENSGALT00000040115	ENSGALT00000040115	2.38139	0.00590908	Uncharacterized protein [Source:UniProtKB/TrEMBL;Acc:F1NXF5] [ENSGALT00000040115]	gb|DR424470	DR424470	1.94943	0.043038	naw07d06.y1 Chicken eye (hatched). Unnormalized (naw) Gallus gallus cDNA clone naw07d06 5', mRNA sequence [DR424470]
ens|ENSGALT00000011913|ref|XM_414942	ENSGALT00000011913	1.81475	0.00592187	RNA binding protein, fox-1 homolog (C. elegans) 1 [Source:HGNC Symbol;Acc:18222] [ENSGALT00000011913]	gb|CR390994|tc|TC392539	CR390994	2.06349	0.0430431	Gallus gallus finished cDNA, clone ChEST750a12. [CR390994]
gb|CR386366	CR386366	4.36095	0.00597306	Gallus gallus finished cDNA, clone ChEST938k13. [CR386366]		CN218931	1.40883	0.0430802	Target: CN218931; Description: CN218931 RJA041F09.ab1 RJbrain Gallus gallus cDNA 5', mRNA sequence; Next best Hit: CN219196(alignment length 60bp with 100.00%identity)
gb|CR389065	CR389065	2.97475	0.00598777	Gallus gallus finished cDNA, clone ChEST839l5. [CR389065]	ens|ENSGALT00000037478|ens|ENSGALT00000021309|ens|ENSGALT00000037479|ens|ENSGALT00000037480	TUBA4A	1.89976	0.0431911	Uncharacterized protein [Source:UniProtKB/TrEMBL;Acc:F1NJN1] [ENSGALT00000037478]
ens|ENSGALT00000012164|gb|XM_420102|tc|TC434246|tc|TC384371	ABCC3	1.32151	0.00602771	Uncharacterized protein [Source:UniProtKB/TrEMBL;Acc:F1NM51] [ENSGALT00000012164]	ref|NM_001006443|ens|ENSGALT00000017270|gb|AJ719388|tc|TC376093	SLC25A4	2.93006	0.0433025	Gallus gallus solute carrier family 25 (mitochondrial carrier; adenine nucleotide translocator), member 4 (SLC25A4), nuclear gene encoding mitochondrial protein, mRNA [NM_001006443]
ens|ENSGALT00000020979|tc|TC410574	ENSGALT00000020979	1.47613	0.00603859	Uncharacterized protein [Source:UniProtKB/TrEMBL;Acc:F1P1M4] [ENSGALT00000020979]		CN222185	1.60021	0.0433041	Target: CN222185; Description: CN222185 WLA039D07.ab1 WLbrain Gallus gallus cDNA 5', mRNA sequence; Next best Hit: CN234416(alignment length 15bp with 100.00%identity)
ens|ENSGALT00000023376|tc|TC408349	ENSGALT00000023376	1.35798	0.00604634	DEAH (Asp-Glu-Ala-Asp/His) box polypeptide 57 [Source:HGNC Symbol;Acc:20086] [ENSGALT00000023376]	ens|ENSGALT00000027655	MIPEP	1.45113	0.0434604	Uncharacterized protein [Source:UniProtKB/TrEMBL;Acc:F1P174] [ENSGALT00000027655]
gb|CR387854|tc|TC408266|ref|XR_140045	CR387854	2.061	0.00606792	Gallus gallus finished cDNA, clone ChEST759f1. [CR387854]	ens|ENSGALT00000021316	ENSGALT00000021316	1.39224	0.0434915	Uncharacterized protein [Source:UniProtKB/TrEMBL;Acc:E1BX94] [ENSGALT00000021316]
	CO759028	1.84308	0.00607611	Target: CO759028; Description: CO759028 brain_EST02220 Brain cDNA Library Gallus gallus cDNA 5', mRNA sequence; Next best Hit: CO759060(alignment length 60bp with 100.00%identity)		CO763943	1.48659	0.0435208	Target: CO763943; Description: CO763943 brain_EST07135 Brain cDNA Library Gallus gallus cDNA 5', mRNA sequence; Next best Hit: A_87_P322287(alignment length 14bp with 100.00%identity)
ref|NM_001199409|ens|ENSGALT00000014548|ens|ENSGALT00000014550|gb|CR385530	PAK7	3.5707	0.00607812	Gallus gallus p21 protein (Cdc42/Rac)-activated kinase 7 (PAK7), mRNA [NM_001199409]	ens|ENSGALT00000035261|tc|TC413694|tc|TC434764|tc|TC415444	ND4L	1.51351	0.0435347	NADH-ubiquinone oxidoreductase chain 4L [Source:UniProtKB/Swiss-Prot;Acc:P18942] [ENSGALT00000035261]
	CO759578	1.80979	0.00608863	Target: CO759578; Description: CO759578 brain_EST02770 Brain cDNA Library Gallus gallus cDNA 5', mRNA sequence; Next best Hit: CO763047(alignment length 63bp with 95.24%identity)	ref|NM_205237|ens|ENSGALT00000037192|gb|BX932038|tc|TC401050	BMP4	1.93214	0.0435692	Gallus gallus bone morphogenetic protein 4 (BMP4), mRNA [NM_205237]
	CN222387	1.44433	0.00612755	Target: CN222387; Description: CN222387 RJA085G02.ab1 RJbrain Gallus gallus cDNA 5', mRNA sequence; Next best Hit: A_87_P286753(alignment length 16bp with 100.00%identity)		CO761022	1.96477	0.0436016	Target: CO761022; Description: CO761022 brain_EST04214 Brain cDNA Library Gallus gallus cDNA 5', mRNA sequence; Next best Hit: BG641861(alignment length 60bp with 100.00%identity)
ens|ENSGALT00000021109|gb|AF098480|gb|DR424448|tc|NP345239	ENSGALT00000021109	2.60191	0.00614468	Uncharacterized protein [Source:UniProtKB/TrEMBL;Acc:F1NPQ8] [ENSGALT00000021109]	gb|CR523811|tc|TC400569	D2HGDH	1.5216	0.0436361	Gallus gallus finished cDNA, clone ChEST560l2. [CR523811]
	CN234027	1.64034	0.0061744	Target: CN234027; Description: CN234027 WLA085B11.ab1 WLbrain Gallus gallus cDNA 5', mRNA sequence; Next best Hit: CN233222(alignment length 60bp with 98.33%identity)		CO762794	1.44128	0.0438092	Target: CO762794; Description: CO762794 brain_EST05986 Brain cDNA Library Gallus gallus cDNA 5', mRNA sequence; Next best Hit: CO762744(alignment length 37bp with 97.30%identity)
	GT_EA606_A_87_P007068	1.61309	0.00618074	Unknown	ens|ENSGALT00000027854|tc|TC379688|ref|XM_417204	NAALAD2	1.53573	0.0438478	N-acetylated alpha-linked acidic dipeptidase 2 [Source:HGNC Symbol;Acc:14526] [ENSGALT00000027854]
ens|ENSGALT00000037985	ENSGALT00000037985	2.60258	0.00620552	Uncharacterized protein [Source:UniProtKB/TrEMBL;Acc:E1C901] [ENSGALT00000037985]	ref|NM_001030943|ens|ENSGALT00000025621|gb|AJ720348|tc|TC374290	RIPK2	1.4846	0.0439662	Gallus gallus receptor-interacting serine-threonine kinase 2 (RIPK2), mRNA [NM_001030943]
ref|NM_205060|ens|ENSGALT00000031834|gb|AF033189|tc|TC375310	LOC395933	1.96025	0.00622188	Gallus gallus sulfotransferase (LOC395933), mRNA [NM_205060]	ens|ENSGALT00000038470|gb|AJ720482|tc|TC387476	ARFIP1	1.24841	0.0439667	ADP-ribosylation factor interacting protein 1 [Source:HGNC Symbol;Acc:21496] [ENSGALT00000038470]
ens|ENSGALT00000024000|gb|XR_026994|ref|XM_003641035	ENSGALT00000024000	1.05262	0.00623521	chromosome 6 open reading frame 170 [Source:HGNC Symbol;Acc:21485] [ENSGALT00000024000]	gb|XM_416394|tc|TC384421	BCL2L13	1.91203	0.044221	PREDICTED: Gallus gallus BCL2-like 13 (apoptosis facilitator) (BCL2L13), mRNA [XM_416394]
ref|NM_001030616|ens|ENSGALT00000005910|gb|AJ720720|tc|TC376309	THG1L	7.98976	0.00623897	Gallus gallus tRNA-histidine guanylyltransferase 1-like (S. cerevisiae) (THG1L), mRNA [NM_001030616]	gb|XR_026679|tc|TC423050	PCSK1	1.61447	0.0442721	PREDICTED: Gallus gallus similar to PC1 (LOC769230), mRNA [XR_026679]
ens|ENSGALT00000041116	ENSGALT00000041116	2.34022	0.00623972	Uncharacterized protein [Source:UniProtKB/TrEMBL;Acc:E1BYI5] [ENSGALT00000041116]	ref|NM_001012893|ens|ENSGALT00000025773|gb|CR385285|gb|AJ851605	MAVS	3.09127	0.0444111	Gallus gallus mitochondrial antiviral signaling protein (MAVS), nuclear gene encoding mitochondrial protein, mRNA [NM_001012893]
gb|XM_001233613|tc|TC377212	SLC35F1	1.01107	0.00625461	PREDICTED: Gallus gallus similar to SLC35F1 protein (LOC770279), mRNA [XM_001233613]		CN219304	2.10906	0.044451	Target: CN219304; Description: CN219304 WLA003G12.ab1 WLbrain Gallus gallus cDNA 5', mRNA sequence; Next best Hit: CN233709(alignment length 60bp with 100.00%identity)
ens|ENSGALT00000008337|gb|BX930451	ENSGALT00000008337	1.68702	0.00626817	ankyrin repeat domain 13A [Source:HGNC Symbol;Acc:21268] [ENSGALT00000008337]	ens|ENSGALT00000004627|gb|BX273614|tc|TC411429|ref|XM_422224	REG4	1.10866	0.0446157	regenerating islet-derived family, member 4 [Source:HGNC Symbol;Acc:22977] [ENSGALT00000004627]
ens|ENSGALT00000026957|ens|ENSGALT00000036694|gb|CR405819|tc|TC441713	CDC5L	1.82669	0.00627705	CDC5 cell division cycle 5-like (S. pombe) [Source:HGNC Symbol;Acc:1743] [ENSGALT00000026957]	tc|NP9675233	NP9675233	1.298	0.0446673	GB
ref|NM_204478|ens|ENSGALT00000039783|ens|ENSGALT00000005446|gb|AB098621	NUF2	1.23661	0.00628563	Gallus gallus NUF2, NDC80 kinetochore complex component, homolog (S. cerevisiae) (NUF2), mRNA [NM_204478]	ens|ENSGALT00000007577|gb|CR338960|tc|TC380451|ref|XM_418501	ENSGALT00000007577	1.43773	0.0447666	obscurin, cytoskeletal calmodulin and titin-interacting RhoGEF [Source:HGNC Symbol;Acc:15719] [ENSGALT00000007577]
	GT_EA606_A_87_P307258	2.42824	0.00629419	Unknown	ref|NM_001101649|tc|TC380715	SNX24	1.38101	0.0448268	Gallus gallus sorting nexin 24 (SNX24), mRNA [NM_001101649]
ens|ENSGALT00000002314|gb|CR385127|tc|TC441488|tc|TC407836	PHF20	1.83983	0.00630114	PHD finger protein 20 [Source:HGNC Symbol;Acc:16098] [ENSGALT00000002314]	gb|XM_419672|tc|TC383382|tc|TC439396	MTHFD1L	1.64919	0.0450465	PREDICTED: Gallus gallus similar to C1-tetrahydrofolate synthase (LOC421633), mRNA [XM_419672]
	AW198471	1.49515	0.0063086	Target: AW198471; Description: AW198471 pnl-b.pk0008.g9 chicken liver cDNA library Gallus gallus cDNA clone pnl-b.pk0008.g9 ; Next best Hit: CN218642(alignment length 14bp with 100.00%identity)	tc|TC423100|ref|XM_001233799	TC423100	1.3779	0.045079	PREDICTED: Gallus gallus uncharacterized LOC771313 (LOC771313), mRNA [XM_001233799]
gb|CR406846|tc|TC409650	CR406846	1.76048	0.00631416	Gallus gallus finished cDNA, clone ChEST733d6. [CR406846]	ref|NM_001167744|ens|ENSGALT00000032786|ens|ENSGALT00000025156|gb|M18866	CKMT2	3.53366	0.045123	Gallus gallus creatine kinase, mitochondrial 2 (sarcomeric) (CKMT2), nuclear gene encoding mitochondrial protein, mRNA [NM_001167744]
ref|NM_001031588|gb|AJ720303|tc|TC374826	BRD4	1.68212	0.00633603	Gallus gallus bromodomain containing 4 (BRD4), mRNA [NM_001031588]		CD214406	1.19663	0.0451378	Target: CD214406; Description: CD214406 pgl1n.pk014.n15 Normalized chicken liver cDNA library (pgl1n) Gallus gallus cDNA clone pgl1n.pk014.n15 ; Next best Hit: A_87_P169658(alignment length 14bp with 100.00%identity)
ens|ENSGALT00000039973|ens|ENSGALT00000004145|gb|CR406982|gb|XM_001235292	ENSGALT00000039973	1.45805	0.00636818	zinc finger protein 76 [Source:HGNC Symbol;Acc:13149] [ENSGALT00000039973]	ref|NM_001006443|ens|ENSGALT00000017270|gb|AJ719388|tc|TC376093	SLC25A4	2.16923	0.0451802	Gallus gallus solute carrier family 25 (mitochondrial carrier; adenine nucleotide translocator), member 4 (SLC25A4), nuclear gene encoding mitochondrial protein, mRNA [NM_001006443]
ens|ENSGALT00000041030	ENSGALT00000041030	5.28059	0.00637206	Uncharacterized protein [Source:UniProtKB/TrEMBL;Acc:F1NNX9] [ENSGALT00000041030]	gb|XM_001235979|tc|TC400168|tc|TC400844	PRKCQ	1.74226	0.045186	PREDICTED: Gallus gallus similar to protein kinase C-theta (LOC776459), partial mRNA [XM_001235979]
ref|NM_001031353|gb|AJ720516|tc|TC374664	ADRBK1	2.2397	0.00637799	Gallus gallus adrenergic, beta, receptor kinase 1 (ADRBK1), mRNA [NM_001031353]	ens|ENSGALT00000013911|gb|CR385296|tc|TC387122|ref|XM_419323	KLHDC3	2.79142	0.0451957	kelch domain containing 3 [Source:HGNC Symbol;Acc:20704] [ENSGALT00000013911]
	CO763977	2.21534	0.00637952	Target: CO763977; Description: CO763977 brain_EST07169 Brain cDNA Library Gallus gallus cDNA 5', mRNA sequence; Next best Hit: CO759643(alignment length 14bp with 100.00%identity)	ens|ENSGALT00000018472|gb|CR391122|gb|XM_416147|tc|TC382639	TMCC3	2.23376	0.0452485	transmembrane and coiled-coil domain family 3 [Source:HGNC Symbol;Acc:29199] [ENSGALT00000018472]
ens|ENSGALT00000025316|gb|BX950723|tc|NP9676208|ref|XM_420835	NAT8L	2.08549	0.0064035	N-acetyltransferase 8-like (GCN5-related, putative) [Source:HGNC Symbol;Acc:26742] [ENSGALT00000025316]	ens|ENSGALT00000009920|tc|TC434422	ENSGALT00000009920	1.29209	0.0454799	Uncharacterized protein [Source:UniProtKB/TrEMBL;Acc:E1C6G0] [ENSGALT00000009920]
	CN219537	1.29658	0.00640741	Target: CN219537; Description: CN219537 RJA051H01.ab1 RJbrain Gallus gallus cDNA 5', mRNA sequence; Next best Hit: CN224884(alignment length 15bp with 100.00%identity)	gb|CR523168|gb|BX932907	CR523168	2.37747	0.0454931	Gallus gallus finished cDNA, clone ChEST642j16. [CR523168]
gb|BX933236|gb|BX933897|tc|TC429009	ZAK	1.41528	0.00641348	Gallus gallus finished cDNA, clone ChEST517f19. [BX933236]	ens|ENSGALT00000038778	ENSGALT00000038778	1.48466	0.0455307	Uncharacterized protein [Source:UniProtKB/TrEMBL;Acc:F1NGF6] [ENSGALT00000038778]
ens|ENSGALT00000005355|gb|CR354229|gb|CO766698|tc|TC442862	IFI30	1.74616	0.00642995	interferon, gamma-inducible protein 30 [Source:HGNC Symbol;Acc:5398] [ENSGALT00000005355]		AW198252	2.93818	0.045586	Target: AW198252; Description: AW198252 pnl-b.pk0001.e10 chicken liver cDNA library Gallus gallus cDNA clone pnl-b.pk0001.e10 5', mRNA sequence; Next best Hit: CN218121(alignment length 59bp with 93.22%identity)
gb|CR389051	CR389051	3.38424	0.00643191	Gallus gallus finished cDNA, clone ChEST342d11. [CR389051]		CO763100	2.31565	0.0456087	Target: CO763100; Description: CO763100 brain_EST06292 Brain cDNA Library Gallus gallus cDNA 5', mRNA sequence; Next best Hit: CN218436(alignment length 15bp with 100.00%identity)
tc|TC387118|ref|XM_003643590	TC387118	1.42794	0.00649123	Rep: Zonadhesin precursor. - Xenopus tropicalis, partial (55%) [TC387118]	ens|ENSGALT00000019607|tc|NP9667697	ENSGALT00000019607	1.4878	0.045688	GB
gb|CR386037|gb|CO766200|tc|TC413360	CR386037	1.32908	0.00649582	Gallus gallus finished cDNA, clone ChEST217m11. [CR386037]		CN217034	1.32742	0.0456988	Target: CN217034; Description: CN217034 RJA004B10.ab1 RJbrain Gallus gallus cDNA 5', mRNA sequence; Next best Hit: CN218439(alignment length 59bp with 96.61%identity)
	CN225904	1.7815	0.00649962	Target: CN225904; Description: CN225904 WLA080H09.ab1 WLbrain Gallus gallus cDNA 5', mRNA sequence; Next best Hit: A_87_P065931(alignment length 14bp with 100.00%identity)	ens|ENSGALT00000015296|gb|BX931703|gb|XM_421176|tc|TC383483	LOC423256	1.24666	0.0457389	Uncharacterized protein [Source:UniProtKB/TrEMBL;Acc:F1P042] [ENSGALT00000015296]
gb|CR406273|tc|TC415713	ASPH	2.48456	0.00650036	Gallus gallus finished cDNA, clone ChEST574n3. [CR406273]	gb|XM_001233838|tc|TC381540|ref|XM_003641586|ref|XM_003641587	SCN1A	1.62951	0.0457509	PREDICTED: Gallus gallus hypothetical protein LOC771555 (LOC771555), mRNA [XM_001233838]
gb|CR354112	CR354112	1.30506	0.00650658	Gallus gallus finished cDNA, clone ChEST88n23. [CR354112]	ens|ENSGALT00000025725|gb|BX950279|gb|BX930003|gb|BX932052	C3H6orf57	3.18515	0.0458899	chromosome 6 open reading frame 57 [Source:HGNC Symbol;Acc:20957] [ENSGALT00000025725]
ens|ENSGALT00000008865|gb|XM_414344|tc|TC390871	APPL1	3.68721	0.00651773	adaptor protein, phosphotyrosine interaction, PH domain and leucine zipper containing 1 [Source:HGNC Symbol;Acc:24035] [ENSGALT00000008865]		CO761550	1.53941	0.0460026	Target: CO761550; Description: CO761550 brain_EST04742 Brain cDNA Library Gallus gallus cDNA 5', mRNA sequence; Next best Hit: CN233716(alignment length 15bp with 100.00%identity)
gb|L13234|gb|CO768409|tc|TC397781|tc|TC400331	RPL10	1.27378	0.00653011	Gallus gallus Jun-binding protein mRN, 3' end. [L13234]	ens|ENSGALT00000007959|gb|CR353126|gb|BX930769	TIMM8A	1.13211	0.0462322	translocase of inner mitochondrial membrane 8 homolog A (yeast) [Source:HGNC Symbol;Acc:11817] [ENSGALT00000007959]
gb|CR352441|gb|BX267757|tc|TC428630|tc|TC407301	CR352441	1.15862	0.00653389	Gallus gallus finished cDNA, clone ChEST324m23. [CR352441]	gb|CR390792|gb|BU298202	CR390792	1.25337	0.0462855	Gallus gallus finished cDNA, clone ChEST619f16. [CR390792]
gb|CR733086|gb|CR391632|tc|TC403746	CR733086	2.06496	0.00654058	Gallus gallus finished cDNA, clone ChEST876o10. [CR733086]	gb|XR_027186|tc|TC409030|tc|TC387611	XR_027186	1.69653	0.0463938	PREDICTED: Gallus gallus similar to myosin 10 (LOC429030), mRNA [XR_027186]
ref|NM_205268|ens|ENSGALT00000030813|ens|ENSGALT00000025959|gb|X59284	NOV	1.77515	0.00654745	Gallus gallus nephroblastoma overexpressed gene (NOV), mRNA [NM_205268]	ens|ENSGALT00000004481|gb|XR_026838|tc|TC394277|ref|XM_003642745	ENSGALT00000004481	1.52843	0.0464268	glutamate receptor, metabotropic 4 [Source:HGNC Symbol;Acc:4596] [ENSGALT00000004481]
gb|XM_424872|tc|TC378630|tc|TC436448	PIGG	5.47334	0.0065491	PREDICTED: Gallus gallus hypothetical LOC427290 (LOC427290), mRNA [XM_424872]	ens|ENSGALT00000039655|ens|ENSGALT00000039654|gb|XR_026713|ref|XM_003642898	ENSGALT00000039655	1.60464	0.046481	CBP80/20-dependent translation initiation factor [Source:HGNC Symbol;Acc:23925] [ENSGALT00000039655]
	CO759063	1.28043	0.00655168	Target: CO759063; Description: CO759063 brain_EST02255 Brain cDNA Library Gallus gallus cDNA 5', mRNA sequence; Next best Hit: CO759180(alignment length 60bp with 100.00%identity)	tc|TC423091|ref|XM_001235733	TC423091	2.10686	0.0465605	Rep: Coronin-1B - Pongo pygmaeus (Orangutan), partial (78%) [TC423091]
gb|CR386812	CR386812	1.35022	0.00655403	Gallus gallus finished cDNA, clone ChEST916p11. [CR386812]		CN218371	1.40528	0.0465746	Target: CN218371; Description: CN218371 RJA029B04.ab1 RJbrain Gallus gallus cDNA 5', mRNA sequence; Next best Hit: CO759662(alignment length 14bp with 100.00%identity)
gb|BX931799	BX931799	2.86423	0.00655899	Gallus gallus finished cDNA, clone ChEST803k5. [BX931799]	ref|NM_001006471|ens|ENSGALT00000010823|gb|AJ720279|tc|TC374597	TOLLIP	1.18211	0.0466629	Gallus gallus toll interacting protein (TOLLIP), mRNA [NM_001006471]
gb|CR386789|tc|TC415840	CR386789	1.27529	0.00656157	Gallus gallus finished cDNA, clone ChEST1010e13. [CR386789]		CN224580	1.69855	0.0467412	Target: CN224580; Description: CN224580 WLA057H09.ab1 WLbrain Gallus gallus cDNA 5', mRNA sequence; Next best Hit: CO760830(alignment length 16bp with 100.00%identity)
ens|ENSGALT00000021457|gb|CR391588	ENSGALT00000021457	1.67965	0.0065688	plexin B2 [Source:HGNC Symbol;Acc:9104] [ENSGALT00000021457]		CN218152	1.54703	0.0470019	Target: CN218152; Description: CN218152 RJA025A05.ab1 RJbrain Gallus gallus cDNA 5', mRNA sequence; Next best Hit: CO762388(alignment length 56bp with 89.29%identity)
ens|ENSGALT00000013318|gb|CR524421|gb|XM_421109|tc|TC382549	MADD	2.63082	0.00658229	MAP-kinase activating death domain [Source:HGNC Symbol;Acc:6766] [ENSGALT00000013318]		CN220363	2.80372	0.0470204	Target: CN220363; Description: CN220363 WLA015E04.ab1 WLbrain Gallus gallus cDNA 5', mRNA sequence; Next best Hit: CN218471(alignment length 60bp with 93.33%identity)
	CO760732	1.71251	0.00658382	Target: CO760732; Description: CO760732 brain_EST03924 Brain cDNA Library Gallus gallus cDNA 5', mRNA sequence; Next best Hit: A_87_P102211(alignment length 14bp with 100.00%identity)	ens|ENSGALT00000009602|tc|NP9673116|ref|XM_425160	KBTBD12	2.4182	0.0471322	Uncharacterized protein [Source:UniProtKB/TrEMBL;Acc:E1C838] [ENSGALT00000009602]
	CN221070	1.28402	0.00658797	Target: CN221070; Description: CN221070 RJA071C02.ab1 RJbrain Gallus gallus cDNA 5', mRNA sequence; Next best Hit: CO764221(alignment length 14bp with 100.00%identity)		CO760734	2.71775	0.0471541	Target: CO760734; Description: CO760734 brain_EST03926 Brain cDNA Library Gallus gallus cDNA 5', mRNA sequence; Next best Hit: A_87_P305184(alignment length 18bp with 94.44%identity)
	CN224698	3.68108	0.00659542	Target: CN224698; Description: CN224698 WLA059H01.ab1 WLbrain Gallus gallus cDNA 5', mRNA sequence; Next best Hit: CO760684(alignment length 16bp with 100.00%identity)		BI394990	2.48748	0.0471871	Target: BI394990; Description: BI394990 pgp1n.pk014.n22 Normalized Chicken Pituitary/Hypothalamus/Pineal Library Gallus gallus cDNA clone pgp1n.pk014.n22 ; Next best Hit: BM491857(alignment length 60bp with 100.00%identity)
	CN220605	1.78766	0.00659572	Target: CN220605; Description: CN220605 RJA067C01.ab1 RJbrain Gallus gallus cDNA 5', mRNA sequence; Next best Hit: CN218305(alignment length 61bp with 95.08%identity)	ref|NM_204694|gb|U20281|gb|AF035530|gb|U25026	CDC37	1.10579	0.0472477	Gallus gallus cell division cycle 37 homolog (S. cerevisiae) (CDC37), mRNA [NM_204694]
	CO762764	2.12604	0.00659702	Target: CO762764; Description: CO762764 brain_EST05956 Brain cDNA Library Gallus gallus cDNA 5', mRNA sequence; Next best Hit: CO763371(alignment length 62bp with 90.32%identity)		CN221203	1.51842	0.0473241	Target: CN221203; Description: CN221203 WLA030B01.ab1 WLbrain Gallus gallus cDNA 5', mRNA sequence; Next best Hit: CN233441(alignment length 60bp with 98.33%identity)
ref|NM_204324|ens|ENSGALT00000009368|gb|CR407170|gb|AF113946	PAFAH1B1	1.26991	0.00660615	Gallus gallus platelet-activating factor acetylhydrolase 1b, regulatory subunit 1 (45kDa) (PAFAH1B1), mRNA [NM_204324]	tc|TC434947	TC434947	3.1719	0.0473634	Rep: Ubiquitin-protein ligase E3B - Homo sapiens (Human), partial (38%) [TC434947]
ref|NM_205360|gb|U19108|tc|TC419798	ALPL	1.57909	0.00661097	Gallus gallus alkaline phosphatase, liver/bone/kidney (ALPL), mRNA [NM_205360]		CO764241	1.08215	0.0473775	Target: CO764241; Description: CO764241 brain_EST07433 Brain cDNA Library Gallus gallus cDNA 5', mRNA sequence; Next best Hit: DQ003271(alignment length 18bp with 94.44%identity)
	CN221910	1.44125	0.00661927	Target: CN221910; Description: CN221910 RJA080F09.ab1 RJbrain Gallus gallus cDNA 5', mRNA sequence; Next best Hit: CN219867(alignment length 16bp with 100.00%identity)	ens|ENSGALT00000011236|gb|XR_027081|tc|TC432472|ref|XM_003642012	WDR6	1.55505	0.0473866	WD repeat domain 6 [Source:HGNC Symbol;Acc:12758] [ENSGALT00000011236]
	CD214362	1.14581	0.00662684	Target: CD214362; Description: CD214362 pgl1n.pk008.k3 Normalized chicken liver cDNA library (pgl1n) Gallus gallus cDNA clone pgl1n.pk008.k3 ; Next best Hit: CD214363(alignment length 60bp with 100.00%identity)	ens|ENSGALT00000035714	ENSGALT00000035714	2.26661	0.0474247	Unknown
	CN225106	1.48971	0.00664786	Target: CN225106; Description: CN225106 WLA067B03.ab1 WLbrain Gallus gallus cDNA 5', mRNA sequence; Next best Hit: A_87_P230048(alignment length 16bp with 100.00%identity)	gb|XM_415686|tc|TC378280	GNA13	1.40181	0.0474627	PREDICTED: Gallus gallus guanine nucleotide binding protein (G protein), alpha 13 (GNA13), mRNA [XM_415686]
gb|CR387721	CR387721	3.47612	0.0066507	Gallus gallus finished cDNA, clone ChEST530m23. [CR387721]		CN216835	1.88096	0.0475698	Target: CN216835; Description: CN216835 RJA001D03.ab1 RJbrain Gallus gallus cDNA 5', mRNA sequence; Next best Hit: CN217077(alignment length 60bp with 100.00%identity)
gb|XM_415871|tc|TC380227	PPM1E	2.86775	0.00665561	PREDICTED: Gallus gallus similar to partner of PIX 1 (LOC417627), mRNA [XM_415871]	ens|ENSGALT00000019589|gb|BX930455|ref|XM_416240	XPNPEP3	1.83129	0.0477969	Uncharacterized protein [Source:UniProtKB/TrEMBL;Acc:F1NH26] [ENSGALT00000019589]
ens|ENSGALT00000009297|gb|CR405811|tc|TC400622	ZNF143	1.73887	0.00665996	zinc finger protein 143 [Source:HGNC Symbol;Acc:12928] [ENSGALT00000009297]		W66584	2.82001	0.0478222	Target: W66584; Description: W66584 EST048 chicken liver cDNA library, Stratagene (cat.#935402) Gallus gallus cDNA clone CLEST039 similar to Duck lactate dehydrogenase B-4 (Ldh-B)/epsilon crystallin, mRNA sequence; Next best Hit: CN218471(alignment length
	CO763016	1.62778	0.00666475	Target: CO763016; Description: CO763016 brain_EST06208 Brain cDNA Library Gallus gallus cDNA 5', mRNA sequence; Next best Hit: CO761350(alignment length 60bp with 96.67%identity)		CO759633	1.89326	0.0479253	Target: CO759633; Description: CO759633 brain_EST02825 Brain cDNA Library Gallus gallus cDNA 5', mRNA sequence; Next best Hit: CO759687(alignment length 60bp with 100.00%identity)
ens|ENSGALT00000037580|ens|ENSGALT00000037581	ENSGALT00000037580	2.33526	0.00670581	A kinase (PRKA) anchor protein 12 [Source:HGNC Symbol;Acc:370] [ENSGALT00000037580]	tc|NP9679771	NP9679771	1.6731	0.0479364	GB
	CN222424	3.14837	0.0067128	Target: CN222424; Description: CN222424 RJA086B05.ab1 RJbrain Gallus gallus cDNA 5', mRNA sequence; Next best Hit: CN216914(alignment length 30bp with 100.00%identity)		CN223941	1.12898	0.0479494	Target: CN223941; Description: CN223941 WLA052C09.ab1 WLbrain Gallus gallus cDNA 5', mRNA sequence; Next best Hit: CN219021(alignment length 60bp with 90.00%identity)
gb|CR733014|tc|TC393202	CR733014	2.18104	0.00672448	Gallus gallus finished cDNA, clone ChEST603k21. [CR733014]	ens|ENSGALT00000036687|gb|CR338746|tc|TC379418|tc|TC392988	ENSGALT00000036687	3.24233	0.0480162	Uncharacterized protein [Source:UniProtKB/TrEMBL;Acc:E1C7Y4] [ENSGALT00000036687]
tc|NP9671285	NP9671285	2.06543	0.00673288	GB	tc|TC404138|ref|XM_429494	TC404138	1.35288	0.0480566	Rep: Predicted protein - Coprinopsis cinerea okayama7#130, partial (3%) [TC404138]
gb|CR387869|tc|TC427467	CR387869	1.09502	0.00674157	Gallus gallus finished cDNA, clone ChEST321b9. [CR387869]		CN222644	2.53534	0.048077	Target: CN222644; Description: CN222644 WLA042C06.ab1 WLbrain Gallus gallus cDNA 5', mRNA sequence; Next best Hit: A_87_P123568(alignment length 20bp with 95.00%identity)
ens|ENSGALT00000041234|gb|CR389422|tc|TC421632|ref|XM_423528	ZNF414	2.11816	0.00675285	zinc finger protein 414 [Source:HGNC Symbol;Acc:20630] [ENSGALT00000041234]	ref|NM_204587|ens|ENSGALT00000040316|ens|ENSGALT00000004997|ens|ENSGALT00000040318	MYH7B	4.17309	0.0485323	Gallus gallus myosin, heavy chain 7B, cardiac muscle, beta (MYH7B), mRNA [NM_204587]
ens|ENSGALT00000038979|gb|AJ720310|tc|TC404598|tc|TC376062	RBM38	1.49634	0.00675287	RNA binding motif protein 38 [Source:HGNC Symbol;Acc:15818] [ENSGALT00000038979]	tc|NP9670156	NP9670156	1.26583	0.0485329	GB
gb|CR385668|gb|BU285147	CR385668	3.34404	0.00676244	Gallus gallus finished cDNA, clone ChEST580f6. [CR385668]		CN216930	2.07307	0.0485981	Target: CN216930; Description: CN216930 RJA002F06.ab1 RJbrain Gallus gallus cDNA 5', mRNA sequence; Next best Hit: CO762164(alignment length 61bp with 95.08%identity)
ref|NM_204863|ens|ENSGALT00000014245|gb|BX932856|gb|AF143848	PLEK	3.08043	0.00678227	Gallus gallus pleckstrin (PLEK), mRNA [NM_204863]	ens|ENSGALT00000003126|gb|BX934215|gb|XM_001231869|tc|TC381937	GPR17	1.06705	0.0486537	Uncharacterized protein [Source:UniProtKB/TrEMBL;Acc:F1P3G9] [ENSGALT00000003126]
gb|CR352357|gb|CR407237|gb|XM_001232600|tc|TC384747	CR352357	2.52406	0.00681286	Gallus gallus finished cDNA, clone ChEST537p3. [CR352357]	tc|NP9668764	NP9668764	3.23595	0.0487843	GB
	CN233410	4.29711	0.00681501	Target: CN233410; Description: CN233410 RJA110H08.ab1 RJbrain Gallus gallus cDNA 5', mRNA sequence; Next best Hit: CN223860(alignment length 13bp with 100.00%identity)	tc|TC401006|tc|TC377267|ref|XM_421757	TC401006	1.57533	0.0487988	Rep: CG10918-PA - Drosophila melanogaster (Fruit fly), partial (13%) [TC401006]
gb|BX934828|gb|CR389847|tc|TC399398|ref|XM_424187	RETSAT	1.5867	0.0068182	Gallus gallus finished cDNA, clone ChEST558k23. [BX934828]		CN220822	1.34413	0.0488245	Target: CN220822; Description: CN220822 RJA069H05.ab1 RJbrain Gallus gallus cDNA 5', mRNA sequence; Next best Hit: A_87_P101846(alignment length 14bp with 100.00%identity)
ens|ENSGALT00000006927|gb|BX932524|gb|BX936193|gb|XM_422273	LOC424430	2.15105	0.00683518	Uncharacterized protein [Source:UniProtKB/TrEMBL;Acc:F1NVJ2] [ENSGALT00000006927]	ens|ENSGALT00000001345|tc|TC424052	ENSGALT00000001345	1.72094	0.0488311	Rep: Protein kinase C theta type (EC 2.7.11.13) (nPKC-theta). - Canis familiaris, partial (45%) [TC424052]
	A_87_P212448	1.38373	0.0068396	; Next best Hit: CN219519(alignment length 60bp with 100.00%identity)		CN217625	1.28879	0.0488628	Target: CN217625; Description: CN217625 RJA015E08.ab1 RJbrain Gallus gallus cDNA 5', mRNA sequence; Next best Hit: CN216992(alignment length 17bp with 100.00%identity)
gb|CR386029|tc|TC409269	SLC35E2B	1.70627	0.00684712	Gallus gallus finished cDNA, clone ChEST211j6. [CR386029]		CN221713	1.84854	0.048876	Target: CN221713; Description: CN221713 WLA033G08.ab1 WLbrain Gallus gallus cDNA 5', mRNA sequence; Next best Hit: CN219775(alignment length 14bp with 100.00%identity)
	W66577	4.97051	0.00686709	Target: W66577; Description: W66577 EST041 chicken liver cDNA library, Stratagene (cat.#935402) Gallus gallus cDNA clone CLEST005 similar to Chicken aldolase B gene, mRNA sequence; Next best Hit: W66538(alignment length 60bp with 100.00%identity)	ref|NM_001199578|ens|ENSGALT00000028088|gb|BX933182|gb|BX930748	MSRB3	1.39526	0.0489654	Gallus gallus methionine sulfoxide reductase B3 (MSRB3), nuclear gene encoding mitochondrial protein, mRNA [NM_001199578]
	CN217213	2.03189	0.00687407	Target: CN217213; Description: CN217213 RJA007A02.ab1 RJbrain Gallus gallus cDNA 5', mRNA sequence; Next best Hit: CN217534(alignment length 60bp with 100.00%identity)	ens|ENSGALT00000040490	ENSGALT00000040490	1.24226	0.048985	Uncharacterized protein [Source:UniProtKB/TrEMBL;Acc:F1P005] [ENSGALT00000040490]
ens|ENSGALT00000024426|ens|ENSGALT00000024425|gb|XM_416579|tc|TC392202	WDR52	2.23707	0.0068884	WD repeat domain 52 [Source:HGNC Symbol;Acc:25631] [ENSGALT00000024426]		W66511	1.56396	0.0490426	Target: W66511; Description: W66511 EST069 chicken liver cDNA library, Stratagene (cat.#935402) Gallus gallus cDNA clone CLEST042 similar to Chicken mitochondrial genome, mRNA sequence; Next best Hit: CO759818(alignment length 60bp with 100.00%identity)
ref|NM_205357|ens|ENSGALT00000003119|gb|L49204|tc|TC375680	BMPR1A	2.32368	0.00689208	Gallus gallus bone morphogenetic protein receptor, type IA (BMPR1A), mRNA [NM_205357]	gb|BU106863	C1H7orf53	3.091	0.0491418	603109541F1 CSEQCHL12 Gallus gallus cDNA clone ChEST54a11 5', mRNA sequence [BU106863]
	CN220407	2.6757	0.006919	Target: CN220407; Description: CN220407 WLA015G07.ab1 WLbrain Gallus gallus cDNA 5', mRNA sequence; Next best Hit: A_87_P062386(alignment length 15bp with 100.00%identity)	ens|ENSGALT00000019837|gb|XM_416248|tc|TC404852	SMCR7L	1.4453	0.0492609	Smith-Magenis syndrome chromosome region, candidate 7-like [Source:HGNC Symbol;Acc:25979] [ENSGALT00000019837]
ens|ENSGALT00000013258|ref|XM_421926	SGOL2	1.90554	0.00692502	shugoshin-like 2 (S. pombe) [Source:HGNC Symbol;Acc:30812] [ENSGALT00000013258]	gb|CR354021|tc|TC423364	CR354021	1.4256	0.0494439	Gallus gallus finished cDNA, clone ChEST641f21. [CR354021]
ref|NM_001044642|ens|ENSGALT00000000909|gb|AM161453|tc|TC375196	ZBTB48	1.14891	0.00692729	Gallus gallus zinc finger and BTB domain containing 48 (ZBTB48), mRNA [NM_001044642]	ens|ENSGALT00000035094	ENSGALT00000035094	1.75844	0.0494808	Uncharacterized protein [Source:UniProtKB/TrEMBL;Acc:F1NYT5] [ENSGALT00000035094]
	CN234567	2.73143	0.00692792	Target: CN234567; Description: CN234567 WLA098B02.ab1 WLbrain Gallus gallus cDNA 5', mRNA sequence; Next best Hit: CN233815(alignment length 16bp with 100.00%identity)	tc|TC380560|ref|XM_425624	TC380560	1.25495	0.0494928	Rep: MKIAA0564 protein - Mus musculus (Mouse), partial (95%) [TC380560]
	CN220831	1.49091	0.00693337	Target: CN220831; Description: CN220831 WLA022E06.ab1 WLbrain Gallus gallus cDNA 5', mRNA sequence; Next best Hit: BG641838(alignment length 18bp with 100.00%identity)	ens|ENSGALT00000025563|tc|TC426526	CA3	1.76128	0.0495044	Uncharacterized protein [Source:UniProtKB/TrEMBL;Acc:E1BQT9] [ENSGALT00000025563]
ens|ENSGALT00000000655|tc|NP9671115|ref|XM_425729	PADI1	1.58345	0.00694713	Uncharacterized protein [Source:UniProtKB/TrEMBL;Acc:E1C0W6] [ENSGALT00000000655]	ens|ENSGALT00000015106|gb|BX931913|gb|CR338694|gb|DR416236	ATP5G3	1.157	0.0495806	Uncharacterized protein [Source:UniProtKB/TrEMBL;Acc:E1BV48] [ENSGALT00000015106]
ens|ENSGALT00000040084|ens|ENSGALT00000006267	WIPF2	1.83906	0.00695302	WAS/WASL interacting protein family, member 2 [Source:HGNC Symbol;Acc:30923] [ENSGALT00000040084]	ref|NM_001031387|ens|ENSGALT00000023408|gb|AJ720045|tc|TC399109	IDH3B	2.84872	0.0495947	Gallus gallus isocitrate dehydrogenase 3 (NAD+) beta (IDH3B), nuclear gene encoding mitochondrial protein, mRNA [NM_001031387]
ens|ENSGALT00000013698|gb|BU272095|tc|TC393124|ref|XM_419313	RALGAPA2	2.42506	0.00698033	Ral GTPase activating protein, alpha subunit 2 (catalytic) [Source:HGNC Symbol;Acc:16207] [ENSGALT00000013698]		CN220436	1.58623	0.0496346	Target: CN220436; Description: CN220436 RJA065H01.ab1 RJbrain Gallus gallus cDNA 5', mRNA sequence; Next best Hit: CN233441(alignment length 60bp with 100.00%identity)
gb|CR390478|gb|BU390336|ref|XM_003641524	CR390478	2.07222	0.00698506	Gallus gallus finished cDNA, clone ChEST440m20. [CR390478]	gb|CR387162|tc|TC415009	CR387162	1.50945	0.0496506	Gallus gallus finished cDNA, clone ChEST718j2. [CR387162]
ref|NM_001030387|gb|CR388655|gb|CR386648|gb|CR385474	ARIH1	1.60235	0.00701913	Gallus gallus ariadne homolog, ubiquitin-conjugating enzyme E2 binding protein, 1 (Drosophila) (ARIH1), mRNA [NM_001030387]		CN217935	1.24856	0.0496659	Target: CN217935; Description: CN217935 RJA021C10.ab1 RJbrain Gallus gallus cDNA 5', mRNA sequence; Next best Hit: CN219445(alignment length 60bp with 100.00%identity)
gb|CR389311	CR389311	3.78669	0.00702114	Gallus gallus finished cDNA, clone ChEST730o3. [CR389311]	ref|NM_001030889|ens|ENSGALT00000041207|ens|ENSGALT00000000878|gb|BX935814	FABP3	1.32026	0.0496766	Gallus gallus fatty acid binding protein 3, muscle and heart (mammary-derived growth inhibitor) (FABP3), mRNA [NM_001030889]
	CN216859	3.2812	0.00703024	Target: CN216859; Description: CN216859 RJA001F07.ab1 RJbrain Gallus gallus cDNA 5', mRNA sequence; Next best Hit: CN224516(alignment length 15bp with 100.00%identity)	ens|ENSGALT00000040474|ens|ENSGALT00000001503|tc|TC434251	KIFC3	1.54894	0.0498449	Uncharacterized protein [Source:UniProtKB/TrEMBL;Acc:F1P0D6] [ENSGALT00000040474]
gb|XM_417398|tc|TC391502	C20H20orf177	1.41537	0.00703651	PREDICTED: Gallus gallus similar to OTTHUMP00000031431 (LOC419221), mRNA [XM_417398]	gb|CR391646|gb|CR385290|tc|TC381368|ref|XM_422532	CR391646	1.25192	0.0498611	Gallus gallus finished cDNA, clone ChEST409m1. [CR391646]
ens|ENSGALT00000001181|tc|TC395642|tc|TC405997|tc|TC400243	KIAA0174	1.44106	0.0070382	increased sodium tolerance 1 homolog (yeast) [Source:HGNC Symbol;Acc:28977] [ENSGALT00000001181]		CN220512	1.87507	0.0499223	Target: CN220512; Description: CN220512 WLA016F05.ab1 WLbrain Gallus gallus cDNA 5', mRNA sequence; Next best Hit: CN221617(alignment length 61bp with 98.36%identity)
ens|ENSGALT00000020857|ens|ENSGALT00000037619|gb|BX935207|gb|XM_416332	MYBPC1	1.89979	0.0070459	myosin binding protein C, slow type [Source:HGNC Symbol;Acc:7549] [ENSGALT00000020857]	gb|CR385579|tc|TC416365|tc|TC406238|tc|TC437068	AGAP3	1.52549	0.0499878	Gallus gallus finished cDNA, clone ChEST91a3. [CR385579]
	CN222868	5.65251	0.00704752	Target: CN222868; Description: CN222868 WLA043G08.ab1 WLbrain Gallus gallus cDNA 5', mRNA sequence; Next best Hit: A_87_P018410(alignment length 50bp with 92.00%identity)	ref|NM_204942|ens|ENSGALT00000007113|ens|ENSGALT00000007110|gb|AF045650	CLIP1	1.38992	0.0500492	Gallus gallus CAP-GLY domain containing linker protein 1 (CLIP1), mRNA [NM_204942]
gb|AF454503|tc|NP493738	TCF7L1	2.423	0.00705318	Gallus gallus HMG-box transcription factor Tcf-3 (TCF3) mRNA, partial cds. [AF454503]		CN218562	1.31064	0.0502562	Target: CN218562; Description: CN218562 RJA032D04.ab1 RJbrain Gallus gallus cDNA 5', mRNA sequence; Next best Hit: CN222022(alignment length 60bp with 100.00%identity)
	CN219972	1.54485	0.00706106	Target: CN219972; Description: CN219972 WLA011G10.ab1 WLbrain Gallus gallus cDNA 5', mRNA sequence; Next best Hit: CN222855(alignment length 56bp with 94.64%identity)	ref|NM_001031480|ens|ENSGALT00000016103|gb|AJ720691|tc|TC375142	DYRK2	2.12504	0.0504269	Gallus gallus dual-specificity tyrosine-(Y)-phosphorylation regulated kinase 2 (DYRK2), mRNA [NM_001031480]
gb|AM773262|gb|AM773264|tc|TC432425	AM773262	1.60671	0.00706248	Gallus gallus partial mRNA for immunoglobulin light chain variable region (IGVL gene), clone P30_5C9. [AM773262]	ens|ENSGALT00000025479|gb|BX934970|gb|BX935311|gb|BX930346	N6AMT1	1.4923	0.0505243	N-6 adenine-specific DNA methyltransferase 1 (putative) [Source:HGNC Symbol;Acc:16021] [ENSGALT00000025479]
ens|ENSGALT00000002760|tc|NP9673500	LOC415664	1.24813	0.00706797	Uncharacterized protein [Source:UniProtKB/TrEMBL;Acc:F1NGR3] [ENSGALT00000002760]		CN217483	1.62816	0.0506966	Target: CN217483; Description: CN217483 RJA012H12.ab1 RJbrain Gallus gallus cDNA 5', mRNA sequence; Next best Hit: CN218156(alignment length 60bp with 98.33%identity)
	CN220709	2.53367	0.00706894	Target: CN220709; Description: CN220709 RJA068F03.ab1 RJbrain Gallus gallus cDNA 5', mRNA sequence; Next best Hit: CO759346(alignment length 60bp with 100.00%identity)	ref|NM_001167744|ens|ENSGALT00000032786|ens|ENSGALT00000025156|gb|M18866	CKMT2	3.65524	0.0507116	Gallus gallus creatine kinase, mitochondrial 2 (sarcomeric) (CKMT2), nuclear gene encoding mitochondrial protein, mRNA [NM_001167744]
ref|NM_205182|ens|ENSGALT00000024928|gb|X92867|gb|X92866	LOC396098	2.85637	0.0070721	Gallus gallus B6.1 (LOC396098), mRNA [NM_205182]	ens|ENSGALT00000007386|gb|CR389245|gb|XM_415487|tc|TC397035	ENDOG	1.52888	0.0508477	endonuclease G [Source:HGNC Symbol;Acc:3346] [ENSGALT00000007386]
ens|ENSGALT00000020693|tc|NP9678464|ref|XM_418918	RNF144B	3.03101	0.00711277	ring finger protein 144B [Source:HGNC Symbol;Acc:21578] [ENSGALT00000020693]	gb|CR389380|gb|XM_415920|tc|TC391221|tc|TC378103	CR389380	1.41689	0.0508643	Gallus gallus finished cDNA, clone ChEST982i22. [CR389380]
ens|ENSGALT00000009749|gb|XM_422347|tc|TC378932	CDC7	2.24407	0.00711794	Uncharacterized protein [Source:UniProtKB/TrEMBL;Acc:F1NB13] [ENSGALT00000009749]	ref|NM_001079575|ens|ENSGALT00000009013|gb|AB284187|gb|BX930531	NTHL1	1.58446	0.0509546	Gallus gallus nth endonuclease III-like 1 (E. coli) (NTHL1), mRNA [NM_001079575]
ens|ENSGALT00000008346|tc|TC408005|ref|XM_003641904	ENSGALT00000008346	1.72783	0.0071181	zinc and ring finger 1 [Source:HGNC Symbol;Acc:18452] [ENSGALT00000008346]	ens|ENSGALT00000018893|gb|XM_419617|tc|TC381804	MAP3K4	1.50161	0.051116	mitogen-activated protein kinase kinase kinase 4 [Source:HGNC Symbol;Acc:6856] [ENSGALT00000018893]
ens|ENSGALT00000009403|tc|TC421437|ref|XM_417420	SRMS	2.09544	0.00712554	src-related kinase lacking C-terminal regulatory tyrosine and N-terminal myristylation sites [Source:HGNC Symbol;Acc:11298] [ENSGALT00000009403]		CN221122	1.23476	0.0512029	Target: CN221122; Description: CN221122 RJA072A10.ab1 RJbrain Gallus gallus cDNA 5', mRNA sequence; Next best Hit: CN219206(alignment length 15bp with 100.00%identity)
gb|CR389886|gb|BU419929|tc|TC427562|tc|TC416395	CR389886	1.53725	0.00713728	Gallus gallus finished cDNA, clone ChEST721g8. [CR389886]	gb|CR385283	CR385283	6.81694	0.0512093	Gallus gallus finished cDNA, clone ChEST804i22. [CR385283]
	CN234087	2.35345	0.00713807	Target: CN234087; Description: CN234087 WLA095B03.ab1 WLbrain Gallus gallus cDNA 5', mRNA sequence; Next best Hit: CN225678(alignment length 14bp with 100.00%identity)	ref|NM_001012868|ens|ENSGALT00000000848|ens|ENSGALT00000040899|gb|AJ720026	ARL8A	1.45266	0.0512943	Gallus gallus ADP-ribosylation factor-like 8A (ARL8A), mRNA [NM_001012868]
ens|ENSGALT00000029093|gb|BX933926|gb|BX935275|tc|TC422540	COX1	2.70489	0.00719012	cytochrome c oxidase subunit I [Source:RefSeq peptide;Acc:NP_006917] [ENSGALT00000029093]	ens|ENSGALT00000039371	ENSGALT00000039371	3.11821	0.0513638	Uncharacterized protein [Source:UniProtKB/TrEMBL;Acc:E1BVQ7] [ENSGALT00000039371]
gb|DR413036	RPL7A	2.02344	0.0072542	gPGC_EST02878 Embryonic gonadal PGC cDNA Library Gallus gallus cDNA 5', mRNA sequence [DR413036]	gb|CR390347|gb|BX932835|gb|BX934265|gb|BX930064	CR390347	1.50008	0.0515121	Gallus gallus finished cDNA, clone ChEST153m19. [CR390347]
gb|XM_001231438|tc|TC415689	TBC1D16	1.42795	0.00726395	PREDICTED: Gallus gallus hypothetical protein LOC768712 (LOC768712), mRNA [XM_001231438]	ens|ENSGALT00000007918|ref|XM_422615	COL4A4	2.27212	0.0516266	collagen, type IV, alpha 4 [Source:HGNC Symbol;Acc:2206] [ENSGALT00000007918]
gb|BX929656	BX929656	2.94948	0.00726628	Gallus gallus finished cDNA, clone ChEST793c3. [BX929656]	ens|ENSGALT00000021073|gb|XM_416363|tc|TC377749	YARS2	1.52299	0.051647	Uncharacterized protein [Source:UniProtKB/TrEMBL;Acc:E1C266] [ENSGALT00000021073]
ref|NM_204386|ens|ENSGALT00000010345|ens|ENSGALT00000010344|ens|ENSGALT00000039357	LOC378902	1.18279	0.00727781	Gallus gallus death domain-containing tumor necrosis factor receptor superfamily member 23 (LOC378902), mRNA [NM_204386]	ens|ENSGALT00000037480|ens|ENSGALT00000021309|ens|ENSGALT00000037479|tc|TC377614	TUBA4A	1.559	0.0517046	Uncharacterized protein [Source:UniProtKB/TrEMBL;Acc:F1NJN1] [ENSGALT00000037480]
	CO759179	2.34985	0.00730409	Target: CO759179; Description: CO759179 brain_EST02371 Brain cDNA Library Gallus gallus cDNA 5', mRNA sequence; Next best Hit: CO759336(alignment length 60bp with 100.00%identity)		CN233869	1.70481	0.052091	Target: CN233869; Description: CN233869 RJA119G02.ab1 RJbrain Gallus gallus cDNA 5', mRNA sequence; Next best Hit: CN219736(alignment length 56bp with 100.00%identity)
ens|ENSGALT00000040311	ENSGALT00000040311	2.25997	0.00730717	Uncharacterized protein [Source:UniProtKB/TrEMBL;Acc:F1P395] [ENSGALT00000040311]		AW198344	1.48375	0.0521605	Target: AW198344; Description: AW198344 pnl-b.pk0001.c11 chicken liver cDNA library Gallus gallus cDNA clone pnl-b.pk0001.c11 ; Next best Hit: BG641595(alignment length 29bp with 93.10%identity)
ens|ENSGALT00000016608	ENSGALT00000016608	3.04006	0.00731648	Uncharacterized protein [Source:UniProtKB/TrEMBL;Acc:F1NBJ0] [ENSGALT00000016608]	ens|ENSGALT00000018893|gb|XM_419617|tc|TC381804	MAP3K4	1.64788	0.0521658	mitogen-activated protein kinase kinase kinase 4 [Source:HGNC Symbol;Acc:6856] [ENSGALT00000018893]
gb|BX935532	COBL	2.68086	0.00732097	Gallus gallus finished cDNA, clone ChEST864j12. [BX935532]		BG711784	2.21297	0.0522102	Target: BG711784; Description: BG711784 pgl1n.pk009.h3 Normalized Liver Library Gallus gallus cDNA clone pgl1n.pk009.h3 ; Next best Hit: CN216843(alignment length 15bp with 100.00%identity)
	CN220978	1.44561	0.00734001	Target: CN220978; Description: CN220978 WLA028E12.ab1 WLbrain Gallus gallus cDNA 5', mRNA sequence; Next best Hit: CN221289(alignment length 60bp with 100.00%identity)		CN220209	1.6929	0.0522227	Target: CN220209; Description: CN220209 WLA014A06.ab1 WLbrain Gallus gallus cDNA 5', mRNA sequence; Next best Hit: CN219381(alignment length 60bp with 91.67%identity)
tc|NP9666041	NP9666041	4.5469	0.0073408	GB	ens|ENSGALT00000007690|gb|BX929368|gb|BX934341|tc|TC415981	FLCN	1.89484	0.0522966	folliculin [Source:HGNC Symbol;Acc:27310] [ENSGALT00000007690]
ref|NM_001199596|tc|TC411587|tc|TC433185	BRSK2	2.38829	0.00734886	Gallus gallus BR serine/threonine kinase 2 (BRSK2), mRNA [NM_001199596]	ref|NM_001005836|ens|ENSGALT00000003047|gb|AJ720131|tc|TC440612	AARS	1.48626	0.05238	Gallus gallus alanyl-tRNA synthetase (AARS), mRNA [NM_001005836]
tc|NP9671301	NP9671301	2.3856	0.00737944	GB		CO762319	1.76528	0.0523921	Target: CO762319; Description: CO762319 brain_EST05511 Brain cDNA Library Gallus gallus cDNA 5', mRNA sequence; Next best Hit: A_87_P292128(alignment length 14bp with 100.00%identity)
tc|NP9675286	NP9675286	1.71897	0.00738535	GB	gb|DR419728|tc|TC381260|tc|TC396295|tc|TC381232	DR419728	2.29102	0.0526064	gPGC_EST09570 Embryonic gonadal PGC cDNA Library Gallus gallus cDNA 5', mRNA sequence [DR419728]
gb|XM_424932|tc|TC383595|tc|TC443497	FREM1	1.15387	0.00739327	PREDICTED: Gallus gallus similar to extracellular matrix protein QBRICK (LOC427355), mRNA [XM_424932]	ref|NM_001031134|ens|ENSGALT00000016584|gb|AJ851433|tc|TC404942	C4H4orf29	1.83899	0.0526091	Gallus gallus chromosome 4 open reading frame, human C4orf29 (C4H4orf29), mRNA [NM_001031134]
ref|NM_205105|ens|ENSGALT00000037814|ens|ENSGALT00000019091|gb|U03910	EPHA5	1.8655	0.00741828	Gallus gallus EPH receptor A5 (EPHA5), mRNA [NM_205105]	tc|TC392628	TC392628	2.18552	0.052646	Rep: 40 kDa peptidyl-prolyl cis-trans isomerase - Bos taurus (Bovine), partial (96%) [TC392628]
	CN218204	1.66194	0.00741961	Target: CN218204; Description: CN218204 RJA026E11.ab1 RJbrain Gallus gallus cDNA 5', mRNA sequence; Next best Hit: A_87_P095196(alignment length 14bp with 100.00%identity)	ref|NM_001005819|ens|ENSGALT00000009692|gb|AJ851743|gb|CR523906	BTBD1	2.4531	0.0527002	Gallus gallus BTB (POZ) domain containing 1 (BTBD1), mRNA [NM_001005819]
ens|ENSGALT00000010780|gb|XM_417890|tc|TC379835	ARHGEF12	3.43454	0.00741962	Rho guanine nucleotide exchange factor (GEF) 12 [Source:HGNC Symbol;Acc:14193] [ENSGALT00000010780]	ref|NM_001006194|ens|ENSGALT00000038328|ens|ENSGALT00000011635|gb|BX935621	COQ5	1.24511	0.0527067	Gallus gallus coenzyme Q5 homolog, methyltransferase (S. cerevisiae) (COQ5), nuclear gene encoding mitochondrial protein, mRNA [NM_001006194]
	CO759285	1.89505	0.00743024	Target: CO759285; Description: CO759285 brain_EST02477 Brain cDNA Library Gallus gallus cDNA 5', mRNA sequence; Next best Hit: CO759956(alignment length 18bp with 100.00%identity)	ref|NM_001031480|ens|ENSGALT00000016103|gb|AJ720691|tc|TC375142	DYRK2	1.93915	0.0527583	Gallus gallus dual-specificity tyrosine-(Y)-phosphorylation regulated kinase 2 (DYRK2), mRNA [NM_001031480]
	CN222525	2.00831	0.00744712	Target: CN222525; Description: CN222525 RJA086H12.ab1 RJbrain Gallus gallus cDNA 5', mRNA sequence; Next best Hit: CN218820(alignment length 16bp with 100.00%identity)	ens|ENSGALT00000013911|gb|CR385296|ref|XM_419323	KLHDC3	3.01868	0.0528345	kelch domain containing 3 [Source:HGNC Symbol;Acc:20704] [ENSGALT00000013911]
tc|TC388298	TC388298	1.45802	0.0074607	Rep: dedicator of cyto-kinesis 1 - Rattus norvegicus, partial (60%) [TC388298]		CN220513	1.35946	0.0528878	Target: CN220513; Description: CN220513 RJA066E08.ab1 RJbrain Gallus gallus cDNA 5', mRNA sequence; Next best Hit: JK265502(alignment length 60bp with 95.00%identity)
ens|ENSGALT00000029077|tc|TC433397|tc|TC430156|tc|TC443883	ND6	1.6063	0.00746946	NADH-ubiquinone oxidoreductase chain 6 [Source:UniProtKB/Swiss-Prot;Acc:P18941] [ENSGALT00000029077]	gb|CR390533	CR390533	1.39897	0.0530553	Gallus gallus finished cDNA, clone ChEST51k5. [CR390533]
ens|ENSGALT00000018529|gb|BX936230|gb|BX950397|gb|BX950394	VEZT	1.33078	0.00747011	vezatin, adherens junctions transmembrane protein [Source:HGNC Symbol;Acc:18258] [ENSGALT00000018529]	ens|ENSGALT00000030988|ens|ENSGALT00000021508|gb|AF095939|gb|CO635738	SDHA	1.81687	0.0535751	succinate dehydrogenase complex, subunit A, flavoprotein (Fp) [Source:HGNC Symbol;Acc:10680] [ENSGALT00000030988]
gb|CR391166|tc|TC426181	CR391166	1.4749	0.00747422	Gallus gallus finished cDNA, clone ChEST181c3. [CR391166]	ens|ENSGALT00000018795|gb|CR353689|gb|BX929835	APOPT1	2.23235	0.0537979	apoptogenic 1 [Source:HGNC Symbol;Acc:20492] [ENSGALT00000018795]
ref|NM_205480|gb|CR354248|gb|M31650|gb|CR524290	LOC396473	2.09398	0.00747627	Gallus gallus myristoylated alanine-rich C kinase substrate (MARCKS) (LOC396473), mRNA [NM_205480]	gb|BX935490|gb|BX929370|tc|TC410547	BX935490	1.30481	0.053931	Gallus gallus finished cDNA, clone ChEST129j17. [BX935490]
	CN224638	1.22374	0.00748484	Target: CN224638; Description: CN224638 WLA058H02.ab1 WLbrain Gallus gallus cDNA 5', mRNA sequence; Next best Hit: CN225667(alignment length 23bp with 91.30%identity)	ens|ENSGALT00000006712|ens|ENSGALT00000034938|gb|BX934914|gb|XM_417840	IL22RA1	1.38185	0.0539365	interleukin 22 receptor, alpha 1 [Source:HGNC Symbol;Acc:13700] [ENSGALT00000006712]
tc|TC394553	TC394553	1.3529	0.00750364	Rep: Coiled-coil domain-containing protein 117. - Gallus gallus, partial (20%) [TC394553]	ens|ENSGALT00000009527|gb|CR523790	MGAT4B	1.27998	0.054078	mannosyl (alpha-1,3-)-glycoprotein beta-1,4-N-acetylglucosaminyltransferase, isozyme B [Source:HGNC Symbol;Acc:7048] [ENSGALT00000009527]
ens|ENSGALT00000022260	ENSGALT00000022260	1.97413	0.00752514	Uncharacterized protein [Source:UniProtKB/TrEMBL;Acc:E1BUG6] [ENSGALT00000022260]		CO759687	1.81406	0.0541116	Target: CO759687; Description: CO759687 brain_EST02879 Brain cDNA Library Gallus gallus cDNA 5', mRNA sequence; Next best Hit: CO759925(alignment length 60bp with 100.00%identity)
ens|ENSGALT00000039290|gb|CR386838	SCAP	1.08662	0.00756594	SREBF chaperone [Source:HGNC Symbol;Acc:30634] [ENSGALT00000039290]	ens|ENSGALT00000000245|gb|XM_418057|tc|TC383828|ref|XM_003642752	ENSGALT00000000245	1.38631	0.0541378	Uncharacterized protein [Source:UniProtKB/TrEMBL;Acc:E1BZW9] [ENSGALT00000000245]
ens|ENSGALT00000003994|gb|XR_026933|tc|TC392975|ref|XM_003642166	ENSGALT00000003994	2.16679	0.00758965	WD repeat domain 90 [Source:HGNC Symbol;Acc:26960] [ENSGALT00000003994]		CN218439	1.45771	0.0541855	Target: CN218439; Description: CN218439 RJA030C03.ab1 RJbrain Gallus gallus cDNA 5', mRNA sequence; Next best Hit: CN220040(alignment length 60bp with 100.00%identity)
	CN217422	1.56416	0.00759511	Target: CN217422; Description: CN217422 RJA012A08.ab1 RJbrain Gallus gallus cDNA 5', mRNA sequence; Next best Hit: CN218280(alignment length 55bp with 100.00%identity)	gb|CR523452|tc|TC401189	CR523452	1.56415	0.054194	Gallus gallus finished cDNA, clone ChEST990i4. [CR523452]
	CN217374	2.41263	0.00759549	Target: CN217374; Description: CN217374 RJA010D08.ab1 RJbrain Gallus gallus cDNA 5', mRNA sequence; Next best Hit: CN217367(alignment length 17bp with 100.00%identity)	gb|CR354212	CR354212	1.44347	0.0542503	Gallus gallus finished cDNA, clone ChEST263d5. [CR354212]
gb|BX934531|gb|DR419228|tc|TC382510|tc|TC398373	ITGA4	1.51249	0.00759878	Gallus gallus finished cDNA, clone ChEST608m16. [BX934531]	gb|CR387282	CR387282	1.57391	0.0543152	Gallus gallus finished cDNA, clone ChEST179l12. [CR387282]
gb|CR388806|tc|TC396708	CR388806	1.4161	0.00759884	Gallus gallus finished cDNA, clone ChEST517a15. [CR388806]		CN218708	2.12048	0.0543506	Target: CN218708; Description: CN218708 RJA037G03.ab1 RJbrain Gallus gallus cDNA 5', mRNA sequence; Next best Hit: CN222265(alignment length 60bp with 100.00%identity)
tc|NP9679482	NP9679482	2.42302	0.0076013	GB	ens|ENSGALT00000016143|ens|ENSGALT00000016142|tc|TC431880|tc|TC386865	ENSGALT00000016143	1.42638	0.0544515	Uncharacterized protein [Source:UniProtKB/TrEMBL;Acc:F1NH54] [ENSGALT00000016143]
ens|ENSGALT00000033157|ens|ENSGALT00000031668|gb|CR388809|tc|NP9677305	ENSGALT00000033157	2.41757	0.00761001	Uncharacterized protein [Source:UniProtKB/TrEMBL;Acc:E1C3N4] [ENSGALT00000033157]	gb|CR385594|tc|TC430541	CR385594	2.96413	0.054665	Gallus gallus finished cDNA, clone ChEST843j1. [CR385594]
ens|ENSGALT00000038175	ENSGALT00000038175	3.68509	0.00761174	Uncharacterized protein [Source:UniProtKB/TrEMBL;Acc:F1ND43] [ENSGALT00000038175]	gb|CR352553	CR352553	2.13779	0.0546767	Gallus gallus finished cDNA, clone ChEST347i3. [CR352553]
ens|ENSGALT00000040055	ENSGALT00000040055	2.51285	0.00761397	Uncharacterized protein [Source:UniProtKB/TrEMBL;Acc:F1NZF9] [ENSGALT00000040055]		CN223204	2.00947	0.054703	Target: CN223204; Description: CN223204 RJA091G07.ab1 RJbrain Gallus gallus cDNA 5', mRNA sequence; Next best Hit: CN218086(alignment length 60bp with 98.33%identity)
tc|NP9675305	NP9675305	1.44381	0.00764229	GB	gb|CR407344|gb|XM_422262|tc|TC383725	TOR1AIP2	1.39878	0.0547067	Gallus gallus finished cDNA, clone ChEST807h1. [CR407344]
ens|ENSGALT00000008080|gb|BX950482|gb|BX933295|gb|XM_420189	TMEM35	1.53935	0.00764575	transmembrane protein 35 [Source:HGNC Symbol;Acc:25864] [ENSGALT00000008080]	ref|NM_001007847|ens|ENSGALT00000008193|gb|CR524050|gb|CR389217	YPEL2	1.28568	0.0547789	Gallus gallus yippee-like 2 (Drosophila) (YPEL2), mRNA [NM_001007847]
ens|ENSGALT00000010473|ens|ENSGALT00000039330|gb|XR_027053|ref|XM_003642468	C20H20orf160	1.39561	0.00765161	chromosome 20 open reading frame 160 [Source:HGNC Symbol;Acc:16153] [ENSGALT00000010473]	gb|XM_419725|tc|TC397264|tc|TC378155	MAP3K5	2.15016	0.0548072	PREDICTED: Gallus gallus similar to mitogen-activated kinase kinase kinase 5 (LOC421688), mRNA [XM_419725]
gb|CR338738	CR338738	2.20424	0.00765239	Gallus gallus finished cDNA, clone ChEST52d12. [CR338738]		CN220042	1.89142	0.0548628	Target: CN220042; Description: CN220042 RJA060G01.ab1 RJbrain Gallus gallus cDNA 5', mRNA sequence; Next best Hit: CN217470(alignment length 15bp with 100.00%identity)
ens|ENSGALT00000033490|gb|CR523869|gb|BU483813|tc|TC401958	ENSGALT00000033490	1.24505	0.00766013	Uncharacterized protein [Source:UniProtKB/TrEMBL;Acc:E1BVY2] [ENSGALT00000033490]	ref|NM_204286|ens|ENSGALT00000002698|ens|ENSGALT00000039585|gb|AF332870	ATP5A1	1.5105	0.0549693	Gallus gallus ATP synthase, H+ transporting, mitochondrial F1 complex, alpha subunit 1, cardiac muscle (ATP5A1), nuclear gene encoding mitochondrial protein, mRNA [NM_204286]
ref|NM_001038691|ens|ENSGALT00000003320|gb|BX930153|gb|AY871207	ZDHHC8	2.76218	0.00766721	Gallus gallus zinc finger, DHHC-type containing 8 (ZDHHC8), mRNA [NM_001038691]	gb|BX950780|gb|CO503793|tc|TC423609	BX950780	1.3891	0.055161	Gallus gallus finished cDNA, clone ChEST267c7. [BX950780]
ref|NM_204677|ens|ENSGALT00000020542|ens|ENSGALT00000037696|ens|ENSGALT00000037699	BAZ2B	2.84061	0.0076764	Gallus gallus bromodomain adjacent to zinc finger domain, 2B (BAZ2B), mRNA [NM_204677]	ens|ENSGALT00000029310|ens|ENSGALT00000029311|ens|ENSGALT00000029388|ens|ENSGALT00000029390	ENSGALT00000029310	1.96622	0.0552297	Unknown
ref|NM_001012602|ens|ENSGALT00000015276|gb|AJ851749|tc|TC440085	SEC62	2.07622	0.00767858	Gallus gallus SEC62 homolog (S. cerevisiae) (SEC62), mRNA [NM_001012602]		CN218792	1.54756	0.0552554	Target: CN218792; Description: CN218792 RJA039F06.ab1 RJbrain Gallus gallus cDNA 5', mRNA sequence; Next best Hit: CN218878(alignment length 60bp with 96.67%identity)
ref|NM_001033501|gb|AB232677	CNIH2	1.87115	0.00768253	Gallus gallus cornichon homolog 2 (CNIH2), mRNA [NM_001033501]	ens|ENSGALT00000038894|ens|ENSGALT00000002476|ens|ENSGALT00000034878|gb|BX929669	CUTA	2.06494	0.0552664	cutA divalent cation tolerance homolog (E. coli) [Source:HGNC Symbol;Acc:21101] [ENSGALT00000038894]
	CN235769	1.29445	0.00770457	Target: CN235769; Description: CN235769 WLA108G09.ab1 WLbrain Gallus gallus cDNA 5', mRNA sequence; Next best Hit: CN217164(alignment length 55bp with 94.55%identity)	gb|CR389383	CR389383	1.77114	0.0553154	Gallus gallus finished cDNA, clone ChEST986i14. [CR389383]
ref|NM_001004385|ens|ENSGALT00000021569|ens|ENSGALT00000037408|ens|ENSGALT00000037410	SOX5	2.8203	0.00771035	Gallus gallus SRY (sex determining region Y)-box 5 (SOX5), mRNA [NM_001004385]		CN221986	2.96389	0.0555881	Target: CN221986; Description: CN221986 WLA036E11.ab1 WLbrain Gallus gallus cDNA 5', mRNA sequence; Next best Hit: CN235057(alignment length 60bp with 100.00%identity)
ref|NM_001030646|ens|ENSGALT00000012946|tc|TC376314	NRF1	2.01078	0.00771886	Gallus gallus nuclear respiratory factor 1 (NRF1), mRNA [NM_001030646]	ens|ENSGALT00000021282|gb|CR353237|tc|TC417286	BCL2L13	1.32323	0.0556032	BCL2-like 13 (apoptosis facilitator) [Source:HGNC Symbol;Acc:17164] [ENSGALT00000021282]
gb|CR523633	CR523633	2.27799	0.00774427	Gallus gallus finished cDNA, clone ChEST758g19. [CR523633]	gb|CR406716|gb|CO773668	CR406716	2.29965	0.0558598	Gallus gallus finished cDNA, clone ChEST984g8. [CR406716]
gb|CR388914|tc|TC401917	CR388914	1.60814	0.00774479	Gallus gallus finished cDNA, clone ChEST166f14. [CR388914]	ref|NM_001004380|ens|ENSGALT00000015293|gb|M80589|gb|CR387458	CAPZA2	1.33534	0.0558694	Gallus gallus capping protein (actin filament) muscle Z-line, alpha 2 (CAPZA2), mRNA [NM_001004380]
ens|ENSGALT00000014420|gb|XM_425261|tc|TC379975	PLCB1	2.21786	0.00775691	phospholipase C, beta 1 (phosphoinositide-specific) [Source:HGNC Symbol;Acc:15917] [ENSGALT00000014420]	ref|NM_205313|ens|ENSGALT00000000352|gb|Y00987|tc|NP9665150	THRA	1.3507	0.0559661	Gallus gallus thyroid hormone receptor, alpha (THRA), mRNA [NM_205313]
	CN220162	1.45198	0.00776462	Target: CN220162; Description: CN220162 RJA062G01.ab1 RJbrain Gallus gallus cDNA 5', mRNA sequence; Next best Hit: CO761081(alignment length 15bp with 100.00%identity)	ens|ENSGALT00000000879	FABP3	1.16671	0.055978	fatty acid binding protein 3 [Source:RefSeq peptide;Acc:NP_001026060] [ENSGALT00000000879]
	CN225679	2.93411	0.00777786	Target: CN225679; Description: CN225679 WLA076A09.ab1 WLbrain Gallus gallus cDNA 5', mRNA sequence; Next best Hit: A_87_P265828(alignment length 16bp with 100.00%identity)		CN217935	1.6436	0.0560762	Target: CN217935; Description: CN217935 RJA021C10.ab1 RJbrain Gallus gallus cDNA 5', mRNA sequence; Next best Hit: CN221203(alignment length 60bp with 100.00%identity)
ens|ENSGALT00000023603|ref|XM_422861	GON4L	1.27785	0.00778429	PREDICTED: Gallus gallus gon-4-like (C. elegans) (GON4L), mRNA [XM_422861]	gb|CR391486|tc|TC409099	CR391486	2.2109	0.0561105	Gallus gallus finished cDNA, clone ChEST904e24. [CR391486]
ens|ENSGALT00000027658|gb|BX931999|tc|TC378603|ref|XM_417138	SACS	2.28543	0.00778532	spastic ataxia of Charlevoix-Saguenay (sacsin) [Source:HGNC Symbol;Acc:10519] [ENSGALT00000027658]	gb|AY029523|tc|NP344390	ITGA5	1.08062	0.0564036	Gallus gallus integrin alpha 5 mRNA, partial cds. [AY029523]
gb|CR389177	CR389177	1.89674	0.00779031	Gallus gallus finished cDNA, clone ChEST491n23. [CR389177]		BG641896	1.42619	0.0566141	Target: BG641896; Description: BG641896 pgl1c.pk002.h1 Chicken liver cDNA library Gallus gallus cDNA clone pgl1c.pk002.h1 ; Next best Hit: CN217829(alignment length 14bp with 100.00%identity)
ref|NM_205436|ens|ENSGALT00000016075|ens|ENSGALT00000000083|ens|ENSGALT00000041334	BG2	1.74151	0.00779246	Gallus gallus intestinal zipper protein (BG2), mRNA [NM_205436]	ens|ENSGALT00000016604|gb|XM_421260|tc|TC400651	ALDH6A1	1.62823	0.0566715	Uncharacterized protein [Source:UniProtKB/TrEMBL;Acc:E1C155] [ENSGALT00000016604]
gb|CR390320	CR390320	1.24508	0.00779667	Gallus gallus finished cDNA, clone ChEST930a21. [CR390320]	ref|NM_001012939|ens|ENSGALT00000023097|gb|BX950803|gb|AJ719806	ANKRD52	1.18931	0.0569827	Gallus gallus ankyrin repeat domain 52 (ANKRD52), mRNA [NM_001012939]
tc|NP9675730	NP9675730	4.01227	0.00781874	GB	gb|CR385959|ref|XM_003641687	LOC424593	1.15911	0.0570243	Gallus gallus finished cDNA, clone ChEST156j1. [CR385959]
ens|ENSGALT00000024340|gb|XM_425527|tc|TC432712|tc|TC379423	GAP43	1.62715	0.0078435	growth associated protein 43 [Source:HGNC Symbol;Acc:4140] [ENSGALT00000024340]	gb|CR390883|gb|BU401011	CR390883	3.21627	0.057062	Gallus gallus finished cDNA, clone ChEST375h18. [CR390883]
ens|ENSGALT00000012278|gb|CR391129|gb|CR390426|tc|TC381581	JAKMIP2	2.3696	0.00784667	janus kinase and microtubule interacting protein 2 [Source:HGNC Symbol;Acc:29067] [ENSGALT00000012278]	ref|NM_205475|gb|M59960|tc|TC374470	ATP1A3	1.85916	0.0571011	Gallus gallus ATPase, Na+/K+ transporting, alpha 3 polypeptide (ATP1A3), mRNA [NM_205475]
gb|BX932108|gb|BX931734|gb|CR407257|tc|TC376684	BX932108	1.39082	0.00788354	Gallus gallus finished cDNA, clone ChEST156g20. [BX932108]		CN218853	2.18756	0.0571898	Target: CN218853; Description: CN218853 RJA040E09.ab1 RJbrain Gallus gallus cDNA 5', mRNA sequence; Next best Hit: A_87_P152043(alignment length 14bp with 100.00%identity)
	CO761984	2.32862	0.00792997	Target: CO761984; Description: CO761984 brain_EST05176 Brain cDNA Library Gallus gallus cDNA 5', mRNA sequence; Next best Hit: CO762635(alignment length 60bp with 100.00%identity)		CN221735	1.33643	0.0575208	Target: CN221735; Description: CN221735 WLA034A02.ab1 WLbrain Gallus gallus cDNA 5', mRNA sequence; Next best Hit: CN217079(alignment length 14bp with 100.00%identity)
ens|ENSGALT00000020376|gb|CR407451|tc|TC404305|tc|TC413943	ENSGALT00000020376	2.17208	0.00793177	PRP39 pre-mRNA processing factor 39 homolog (S. cerevisiae) [Source:HGNC Symbol;Acc:20314] [ENSGALT00000020376]	ens|ENSGALT00000014863|tc|TC442839	GPCPD1	1.76103	0.0575702	glycerophosphocholine phosphodiesterase GDE1 homolog (S. cerevisiae) [Source:HGNC Symbol;Acc:26957] [ENSGALT00000014863]
gb|BX950473	ATP13A1	2.40465	0.00797942	Gallus gallus finished cDNA, clone ChEST106p21. [BX950473]		CN223517	2.08237	0.0575787	Target: CN223517; Description: CN223517 RJA094H02.ab1 RJbrain Gallus gallus cDNA 5', mRNA sequence; Next best Hit: A_87_P269398(alignment length 50bp with 98.00%identity)
ens|ENSGALT00000010764|tc|TC387055|tc|TC382512|ref|XM_422689	MAP3K13	2.31602	0.00797976	mitogen-activated protein kinase kinase kinase 13 [Source:HGNC Symbol;Acc:6852] [ENSGALT00000010764]		CN725550	1.72776	0.0578228	Target: CN725550; Description: CN725550 ROS_liv60 Chicken 7 weeks liver cDNA library Gallus gallus cDNA, mRNA sequence; Next best Hit: CO759633(alignment length 60bp with 100.00%identity)
gb|CR391674	CR391674	3.60044	0.00798064	Gallus gallus finished cDNA, clone ChEST218i16. [CR391674]	gb|CR352667|gb|BU215726|tc|TC384628|tc|TC389142	TECRL	3.27352	0.0578527	Gallus gallus finished cDNA, clone ChEST1005a9. [CR352667]
	CO763409	1.97456	0.00799623	Target: CO763409; Description: CO763409 brain_EST06601 Brain cDNA Library Gallus gallus cDNA 5', mRNA sequence; Next best Hit: CO761696(alignment length 15bp with 100.00%identity)	ref|NM_001252029|gb|CR387350|gb|CR407460|tc|TC426487	USMG5	1.43372	0.0579219	Gallus gallus up-regulated during skeletal muscle growth 5 homolog (mouse) (USMG5), mRNA [NM_001252029]
ens|ENSGALT00000008708|gb|BX258325|tc|TC389257|tc|TC428697	LOC416541	2.25592	0.00799697	Uncharacterized protein [Source:UniProtKB/TrEMBL;Acc:F1NX58] [ENSGALT00000008708]	ens|ENSGALT00000026714|gb|CR388803|gb|XM_420004|tc|TC379325	HADHB	1.85186	0.0581725	Uncharacterized protein [Source:UniProtKB/TrEMBL;Acc:E1BTT4] [ENSGALT00000026714]
ens|ENSGALT00000005272|gb|BX931953|tc|TC436451|tc|TC378314	FAF2	2.79863	0.00801485	Fas associated factor family member 2 [Source:HGNC Symbol;Acc:24666] [ENSGALT00000005272]	ens|ENSGALT00000006927|gb|BX932524|gb|BX936193|gb|XM_422273	LOC424430	1.82753	0.0583212	Uncharacterized protein [Source:UniProtKB/TrEMBL;Acc:F1NVJ2] [ENSGALT00000006927]
ens|ENSGALT00000023805|ref|XM_419140	ENSGALT00000023805	1.72861	0.00803463	Rho GTPase activating protein 28 [Source:HGNC Symbol;Acc:25509] [ENSGALT00000023805]	ens|ENSGALT00000004810|ens|ENSGALT00000015106|gb|BX931913|gb|DR416236	ENSGALT00000004810	1.53323	0.0583948	Uncharacterized protein [Source:UniProtKB/TrEMBL;Acc:E1BV48] [ENSGALT00000015106]
ens|ENSGALT00000030935|ens|ENSGALT00000023912|ens|ENSGALT00000036873|gb|CR388794	SMCHD1	1.58435	0.00803521	structural maintenance of chromosomes flexible hinge domain containing 1 [Source:HGNC Symbol;Acc:29090] [ENSGALT00000030935]	ens|ENSGALT00000032988|gb|AJ719956|tc|TC380796	GFM1	2.34473	0.0584888	Uncharacterized protein [Source:UniProtKB/TrEMBL;Acc:F1NDP6] [ENSGALT00000032988]
ens|ENSGALT00000040679	ENSGALT00000040679	2.49517	0.00803611	Uncharacterized protein [Source:UniProtKB/TrEMBL;Acc:F1P5X0] [ENSGALT00000040679]	ref|NM_205385|ens|ENSGALT00000016632|ens|ENSGALT00000016631|ens|ENSGALT00000035559	PRSS3	2.4475	0.0585717	Gallus gallus protease, serine, 3 (PRSS3), mRNA [NM_205385]
ens|ENSGALT00000025234|gb|CR353628|gb|XM_420824|tc|TC399482	NOP14	3.06422	0.0080537	NOP14 nucleolar protein homolog (yeast) [Source:HGNC Symbol;Acc:16821] [ENSGALT00000025234]	ens|ENSGALT00000026714|gb|CR388803|gb|XM_420004|tc|TC382662	HADHB	2.16799	0.0586023	Uncharacterized protein [Source:UniProtKB/TrEMBL;Acc:E1BTT4] [ENSGALT00000026714]
ens|ENSGALT00000010326|gb|XM_429332|tc|TC398914	LOC415472	3.50562	0.00805685	Uncharacterized protein [Source:UniProtKB/TrEMBL;Acc:E1BSK4] [ENSGALT00000010326]	ens|ENSGALT00000027554|ens|ENSGALT00000016309|gb|DR419415	DCLK2	1.9034	0.0586288	doublecortin-like kinase 2 [Source:HGNC Symbol;Acc:19002] [ENSGALT00000027554]
gb|BX934213	BX934213	3.23999	0.00806254	Gallus gallus finished cDNA, clone ChEST442p13. [BX934213]	ens|ENSGALT00000031983|gb|XM_001233278|tc|TC416617|tc|TC392102	KLC4	1.52999	0.0588875	kinesin light chain 4 [Source:HGNC Symbol;Acc:21624] [ENSGALT00000031983]
tc|NP9676217	NP9676217	2.6302	0.008125	GB		CN217034	1.8407	0.0593446	Target: CN217034; Description: CN217034 RJA004B10.ab1 RJbrain Gallus gallus cDNA 5', mRNA sequence; Next best Hit: CN218439(alignment length 60bp with 100.00%identity)
	CO759717	1.19484	0.00812576	Target: CO759717; Description: CO759717 brain_EST02909 Brain cDNA Library Gallus gallus cDNA 5', mRNA sequence; Next best Hit: CO762667(alignment length 16bp with 100.00%identity)	ref|NM_001128102|ref|NM_001128101|gb|EF635922|gb|EF635923	SLC11A2	1.5355	0.0594068	Gallus gallus solute carrier family 11 (proton-coupled divalent metal ion transporters), member 2 (SLC11A2), transcript variant 1, mRNA [NM_001128102]
gb|CR524124	CR524124	1.44166	0.00812948	Gallus gallus finished cDNA, clone ChEST651o22. [CR524124]	ens|ENSGALT00000019560|gb|BX930590|gb|BX935788|tc|TC377698	MYOZ2	2.44557	0.0595002	myozenin 2 [Source:HGNC Symbol;Acc:1330] [ENSGALT00000019560]
gb|XM_417659|tc|TC383407	CCDC30	1.11975	0.00814296	PREDICTED: Gallus gallus similar to Phosphopantothenoylcysteine synthetase (LOC419508), mRNA [XM_417659]		CN235452	1.55494	0.0597199	Target: CN235452; Description: CN235452 WLA107F08.ab1 WLbrain Gallus gallus cDNA 5', mRNA sequence; Next best Hit: CN220436(alignment length 50bp with 98.00%identity)
ens|ENSGALT00000020309|gb|XM_421477|tc|TC416573|tc|TC409427	PLEKHC1	1.23713	0.00816352	fermitin family member 2 [Source:HGNC Symbol;Acc:15767] [ENSGALT00000020309]		CO761485	1.46893	0.0597659	Target: CO761485; Description: CO761485 brain_EST04677 Brain cDNA Library Gallus gallus cDNA 5', mRNA sequence; Next best Hit: CN218015(alignment length 14bp with 100.00%identity)
	CN222777	1.69296	0.00816719	Target: CN222777; Description: CN222777 RJA089A03.ab1 RJbrain Gallus gallus cDNA 5', mRNA sequence; Next best Hit: CN223488(alignment length 60bp with 100.00%identity)		CN219704	1.12625	0.0597803	Target: CN219704; Description: CN219704 WLA009A07.ab1 WLbrain Gallus gallus cDNA 5', mRNA sequence; Next best Hit: CD214369(alignment length 15bp with 100.00%identity)
	CN225689	1.12288	0.0081705	Target: CN225689; Description: CN225689 WLA076C06.ab1 WLbrain Gallus gallus cDNA 5', mRNA sequence; Next best Hit: CO761314(alignment length 60bp with 100.00%identity)	gb|CR353292	CR353292	1.72421	0.0599576	Gallus gallus finished cDNA, clone ChEST52o13. [CR353292]
	CN224559	3.83043	0.00820139	Target: CN224559; Description: CN224559 WLA057F03.ab1 WLbrain Gallus gallus cDNA 5', mRNA sequence; Next best Hit: CN225196(alignment length 15bp with 100.00%identity)		CN225568	1.46186	0.060043	Target: CN225568; Description: CN225568 WLA074B03.ab1 WLbrain Gallus gallus cDNA 5', mRNA sequence; Next best Hit: CN223964(alignment length 15bp with 100.00%identity)
	CO759018	1.52316	0.00822206	Target: CO759018; Description: CO759018 brain_EST02210 Brain cDNA Library Gallus gallus cDNA 5', mRNA sequence; Next best Hit: CO759025(alignment length 60bp with 100.00%identity)		CN218591	4.84328	0.0601266	Target: CN218591; Description: CN218591 RJA032H04.ab1 RJbrain Gallus gallus cDNA 5', mRNA sequence; Next best Hit: CN218635(alignment length 60bp with 100.00%identity)
gb|CR386205	CR386205	3.32861	0.00823356	Gallus gallus finished cDNA, clone ChEST247n4. [CR386205]	gb|BX932011|ref|XM_001234018|ref|XM_003640514	SMPX	2.69169	0.0601757	Gallus gallus finished cDNA, clone ChEST220b7. [BX932011]
	CN220045	2.07082	0.00826092	Target: CN220045; Description: CN220045 WLA012F03.ab1 WLbrain Gallus gallus cDNA 5', mRNA sequence; Next best Hit: CN221031(alignment length 41bp with 97.56%identity)	gb|XM_001231438|tc|TC442685|tc|TC415689	TBC1D16	1.66063	0.0602544	PREDICTED: Gallus gallus hypothetical protein LOC768712 (LOC768712), mRNA [XM_001231438]
	CN220546	1.97688	0.00826222	Target: CN220546; Description: CN220546 RJA066G08.ab1 RJbrain Gallus gallus cDNA 5', mRNA sequence; Next best Hit: CN221335(alignment length 60bp with 100.00%identity)	ens|ENSGALT00000022743|tc|TC376494|tc|TC415936|tc|TC438943	CHRNA1	2.1186	0.0603315	cholinergic receptor, nicotinic, alpha 1 (muscle) [Source:RefSeq peptide;Acc:NP_990147] [ENSGALT00000022743]
gb|CR390653|gb|DR419187|tc|TC398026	CR390653	1.65915	0.00826436	Gallus gallus finished cDNA, clone ChEST635h1. [CR390653]	gb|XM_419615|tc|TC379650	PARK2	2.0203	0.0603924	PREDICTED: Gallus gallus similar to PARK2 (LOC421577), mRNA [XM_419615]
tc|TC390684|ref|XM_418110	TC390684	1.60729	0.00827426	Rep: ABI gene family, member 3 - Rattus norvegicus (Rat), partial (79%) [TC390684]		CN218196	1.78874	0.0604562	Target: CN218196; Description: CN218196 RJA026D11.ab1 RJbrain Gallus gallus cDNA 5', mRNA sequence; Next best Hit: CN218878(alignment length 60bp with 96.67%identity)
gb|XM_418745|tc|NP9678704|tc|TC387034	TBC1D5	2.34552	0.00828906	PREDICTED: Gallus gallus TBC1 domain family, member 5, transcript variant 2 (TBC1D5), mRNA [XM_418745]	ens|ENSGALT00000013435|gb|CR523577|gb|DR411712|tc|TC401785	ANAPC1	2.11078	0.0605041	anaphase promoting complex subunit 1 [Source:HGNC Symbol;Acc:19988] [ENSGALT00000013435]
ens|ENSGALT00000016548|gb|XR_026996|tc|TC439449|ref|XM_003642990	RFX3	1.30635	0.00828958	regulatory factor X, 3 (influences HLA class II expression) [Source:HGNC Symbol;Acc:9984] [ENSGALT00000016548]	gb|BX929460|gb|BX934069|tc|TC420000|tc|TC414784	BX929460	2.36098	0.0605271	Gallus gallus finished cDNA, clone ChEST188i14. [BX929460]
ens|ENSGALT00000032028|gb|CR390325|gb|XM_420843|tc|TC390651	LOC422901	2.71699	0.00829125	Uncharacterized protein [Source:UniProtKB/TrEMBL;Acc:E1BZZ0] [ENSGALT00000032028]		CN216995	1.51624	0.0608773	Target: CN216995; Description: CN216995 RJA003F06.ab1 RJbrain Gallus gallus cDNA 5', mRNA sequence; Next best Hit: CN220398(alignment length 60bp with 100.00%identity)
	CN220027	2.38248	0.00830991	Target: CN220027; Description: CN220027 RJA060E12.ab1 RJbrain Gallus gallus cDNA 5', mRNA sequence; Next best Hit: CN219995(alignment length 14bp with 100.00%identity)	ref|NM_001001876|gb|AJ584653|tc|TC442088|tc|TC373446	HSPG2	2.16802	0.0608921	Gallus gallus heparan sulfate proteoglycan 2 (HSPG2), mRNA [NM_001001876]
ens|ENSGALT00000038523|tc|TC437634	ENSGALT00000038523	3.40849	0.00831489	Uncharacterized protein [Source:UniProtKB/TrEMBL;Acc:E1BUN7] [ENSGALT00000038523]		CN217935	1.56282	0.0609666	Target: CN217935; Description: CN217935 RJA021C10.ab1 RJbrain Gallus gallus cDNA 5', mRNA sequence; Next best Hit: CN221203(alignment length 60bp with 100.00%identity)
tc|NP9676739	NP9676739	2.75764	0.00832627	GB	gb|CR389974|gb|BU210523|tc|TC387467	CR389974	1.63356	0.0609978	Gallus gallus finished cDNA, clone ChEST911h1. [CR389974]
tc|NP9673811	NP9673811	4.52186	0.00834064	GB	ref|NM_204942|ens|ENSGALT00000007113|ens|ENSGALT00000007110|gb|AF045651	CLIP1	1.95052	0.0610619	Gallus gallus CAP-GLY domain containing linker protein 1 (CLIP1), mRNA [NM_204942]
ens|ENSGALT00000027368|tc|TC402456|tc|TC377574|ref|XM_417016	DIS3	2.47167	0.00835259	DIS3 mitotic control homolog (S. cerevisiae) [Source:HGNC Symbol;Acc:20604] [ENSGALT00000027368]	gb|CR388803|gb|XM_420004|tc|TC379325|tc|TC389579	HADHB	1.7853	0.0611722	Gallus gallus finished cDNA, clone ChEST515b15. [CR388803]
	CO760350	2.84312	0.00835439	Target: CO760350; Description: CO760350 brain_EST03542 Brain cDNA Library Gallus gallus cDNA 5', mRNA sequence; Next best Hit: CO760426(alignment length 24bp with 100.00%identity)	ref|NM_001206496|gb|L25375|gb|BX936046|gb|BX929868	ALDOC	2.05561	0.061426	Gallus gallus aldolase C, fructose-bisphosphate (ALDOC), mRNA [NM_001206496]
gb|CR389978|tc|TC388814	CR389978	1.61058	0.00836669	Gallus gallus finished cDNA, clone ChEST913b21. [CR389978]		CN221474	1.68295	0.061461	Target: CN221474; Description: CN221474 RJA076H12.ab1 RJbrain Gallus gallus cDNA 5', mRNA sequence; Next best Hit: CN217335(alignment length 15bp with 100.00%identity)
	CN218611	2.68792	0.0083802	Target: CN218611; Description: CN218611 RJA036B11.ab1 RJbrain Gallus gallus cDNA 5', mRNA sequence; Next best Hit: CO761720(alignment length 17bp with 100.00%identity)	gb|XM_417640|tc|TC378644	MFN2	1.39725	0.0614975	PREDICTED: Gallus gallus similar to Mitofusin 2 (LOC419484), mRNA [XM_417640]
ref|NM_001031119|ens|ENSGALT00000039704|ens|ENSGALT00000011184|gb|BX934971	CHML	1.39919	0.00838998	Gallus gallus choroideremia-like (Rab escort protein 2) (CHML), mRNA [NM_001031119]	ref|NM_001006462|ens|ENSGALT00000025450|gb|CR353080|gb|AJ719402	IMMT	1.99604	0.0616375	Gallus gallus inner membrane protein, mitochondrial (IMMT), nuclear gene encoding mitochondrial protein, mRNA [NM_001006462]
ens|ENSGALT00000032705|tc|TC383551|ref|XM_001234417	ENSGALT00000032705	4.7137	0.0084178	Uncharacterized protein [Source:UniProtKB/TrEMBL;Acc:F1NBE6] [ENSGALT00000032705]	gb|XM_417640|tc|TC427604|tc|TC378644	MFN2	1.69704	0.0616824	PREDICTED: Gallus gallus similar to Mitofusin 2 (LOC419484), mRNA [XM_417640]
gb|BX929585|gb|CR407352	BX929585	1.15874	0.00841996	Gallus gallus finished cDNA, clone ChEST741f17. [BX929585]		CN218176	1.69745	0.0616888	Target: CN218176; Description: CN218176 RJA026A03.ab1 RJbrain Gallus gallus cDNA 5', mRNA sequence; Next best Hit: CN221229(alignment length 15bp with 100.00%identity)
gb|BX950697	BX950697	1.12323	0.00842285	Gallus gallus finished cDNA, clone ChEST694f16. [BX950697]		CN224945	2.04887	0.0618173	Target: CN224945; Description: CN224945 WLA064E06.ab1 WLbrain Gallus gallus cDNA 5', mRNA sequence; Next best Hit: CN236019(alignment length 60bp with 95.00%identity)
	CO759028	2.1825	0.00844888	Target: CO759028; Description: CO759028 brain_EST02220 Brain cDNA Library Gallus gallus cDNA 5', mRNA sequence; Next best Hit: CO759060(alignment length 60bp with 100.00%identity)	ens|ENSGALT00000019837|gb|XM_416248|tc|TC404852	SMCR7L	1.39396	0.0621107	Smith-Magenis syndrome chromosome region, candidate 7-like [Source:HGNC Symbol;Acc:25979] [ENSGALT00000019837]
ref|NM_001199450|ens|ENSGALT00000013458|tc|TC403139	ZC3H6	2.05456	0.00846364	Gallus gallus zinc finger CCCH-type containing 6 (ZC3H6), mRNA [NM_001199450]	ens|ENSGALT00000035974|tc|NP9667515|tc|NP9666816|tc|NP9667507	LOC777039	1.35609	0.0621574	GB
gb|CR388930	CR388930	2.21348	0.00850989	Gallus gallus finished cDNA, clone ChEST172c24. [CR388930]		CN222604	1.48596	0.0621596	Target: CN222604; Description: CN222604 WLA042A05.ab1 WLbrain Gallus gallus cDNA 5', mRNA sequence; Next best Hit: A_87_P036227(alignment length 15bp with 100.00%identity)
ens|ENSGALT00000005228|gb|CR405762|gb|BX933070|gb|XM_001232890	ENSGALT00000005228	1.76987	0.00851509	Uncharacterized protein [Source:UniProtKB/TrEMBL;Acc:E1C6X8] [ENSGALT00000005228]	gb|L48889|tc|TC422157|tc|TC423388|tc|TC428789	L48889	3.38837	0.0624269	Gallus gallus clone cDNA34R, repeat region. [L48889]
	CN218259	1.71612	0.00851524	Target: CN218259; Description: CN218259 RJA027E04.ab1 RJbrain Gallus gallus cDNA 5', mRNA sequence; Next best Hit: A_87_P094586(alignment length 26bp with 100.00%identity)		CN218828	1.79951	0.0627379	Target: CN218828; Description: CN218828 RJA040B10.ab1 RJbrain Gallus gallus cDNA 5', mRNA sequence; Next best Hit: CN220512(alignment length 60bp with 100.00%identity)
tc|NP9668428	NP9668428	1.90074	0.00851794	GB		CN219153	1.73593	0.0628007	Target: CN219153; Description: CN219153 WLA001H01.ab1 WLbrain Gallus gallus cDNA 5', mRNA sequence; Next best Hit: CN218915(alignment length 14bp with 100.00%identity)
ens|ENSGALT00000023614|gb|CR406974|gb|CR386383|gb|XM_422864	HORMAD1	1.90741	0.00852262	HORMA domain containing 1 [Source:HGNC Symbol;Acc:25245] [ENSGALT00000023614]	ref|NM_204405|ens|ENSGALT00000010491|gb|AB082935|tc|TC374343	ANKRD1	2.96139	0.0628175	Gallus gallus ankyrin repeat domain 1 (cardiac muscle) (ANKRD1), mRNA [NM_204405]
gb|BX935669|tc|TC380439|ref|XM_421896	C7H21orf58	1.87529	0.00853052	Gallus gallus finished cDNA, clone ChEST320d3. [BX935669]	ens|ENSGALT00000039865|gb|CR387018	LOC421258	1.3796	0.0628454	Uncharacterized protein [Source:UniProtKB/TrEMBL;Acc:E1BUK8] [ENSGALT00000039865]
ens|ENSGALT00000001947|gb|BU372599|tc|TC433608|ref|XM_001233690	HOXB9	2.4221	0.00854928	Uncharacterized protein [Source:UniProtKB/TrEMBL;Acc:E1BQM6] [ENSGALT00000001947]		CN220838	1.69552	0.0628537	Target: CN220838; Description: CN220838 WLA022H02.ab1 WLbrain Gallus gallus cDNA 5', mRNA sequence; Next best Hit: CN233187(alignment length 16bp with 100.00%identity)
gb|AB233001|tc|TC424900	AB233001	1.39384	0.00857823	Gallus gallus ighv mRNA for immunoglobulin heavy chain variable region, partial cds, clone: 2C23H. [AB233001]	ens|ENSGALT00000034014|tc|TC409040|tc|TC421407|ref|XM_003642222	ENSGALT00000034014	2.3433	0.0629664	coiled-coil-helix-coiled-coil-helix domain containing 10 [Source:HGNC Symbol;Acc:15559] [ENSGALT00000034014]
gb|BX929979	DNTTIP1	2.09312	0.00859002	Gallus gallus finished cDNA, clone ChEST768j12. [BX929979]	ens|ENSGALT00000038548|gb|CR390240|gb|XM_001233577|tc|NP9674366	ST3GAL3	1.68161	0.0629695	ST3 beta-galactoside alpha-2,3-sialyltransferase 3 [Source:HGNC Symbol;Acc:10866] [ENSGALT00000038548]
	CO760134	1.50241	0.00860209	Target: CO760134; Description: CO760134 brain_EST03326 Brain cDNA Library Gallus gallus cDNA 5', mRNA sequence; Next best Hit: CO759574(alignment length 54bp with 96.30%identity)	ref|NM_001135679|ens|ENSGALT00000007629	SLC47A2	1.11467	0.0631212	Gallus gallus solute carrier family 47, member 2 (SLC47A2), mRNA [NM_001135679]
ref|NM_001184757|ens|ENSGALT00000034365|gb|GU474518|gb|CR523330	PLA2G10	1.68064	0.00860689	Gallus gallus phospholipase A2, group X (PLA2G10), mRNA [NM_001184757]	ref|NM_001159315|ens|ENSGALT00000020453|ens|ENSGALT00000030582|gb|FM994924	PVALB	4.49176	0.0631218	Gallus gallus parvalbumin (PVALB), mRNA [NM_001159315]
gb|CR524448|tc|TC444135	CR524448	1.92813	0.00861538	Gallus gallus finished cDNA, clone ChEST788h7. [CR524448]	gb|BX932001|gb|CR406065|tc|TC405227|tc|TC402304	BX932001	1.55459	0.0636243	Gallus gallus finished cDNA, clone ChEST220e18. [BX932001]
ens|ENSGALT00000008254|tc|TC428943|tc|TC443075	HMCN1	2.67083	0.00862502	hemicentin 1 [Source:HGNC Symbol;Acc:19194] [ENSGALT00000008254]		CO760563	3.00495	0.063673	Target: CO760563; Description: CO760563 brain_EST03755 Brain cDNA Library Gallus gallus cDNA 5', mRNA sequence; Next best Hit: CO760851(alignment length 58bp with 94.83%identity)
ref|NM_001007847|ens|ENSGALT00000008193|gb|CR524050|gb|CR389217	YPEL2	2.0794	0.00863177	Gallus gallus yippee-like 2 (Drosophila) (YPEL2), mRNA [NM_001007847]	ens|ENSGALT00000005377|gb|BX930791|gb|BX935867|gb|DR414690	AIMP2	1.37553	0.0637221	aminoacyl tRNA synthetase complex-interacting multifunctional protein 2 [Source:HGNC Symbol;Acc:20609] [ENSGALT00000005377]
ens|ENSGALT00000017075|ref|XM_426548	JAKMIP3	3.89595	0.00864675	Janus kinase and microtubule interacting protein 3 [Source:HGNC Symbol;Acc:23523] [ENSGALT00000017075]		CN224008	1.64935	0.0637958	Target: CN224008; Description: CN224008 RJA098C08.ab1 RJbrain Gallus gallus cDNA 5', mRNA sequence; Next best Hit: CN219318(alignment length 60bp with 95.00%identity)
gb|CR733059|tc|TC413439|tc|TC407727	CR733059	1.83718	0.00865949	Gallus gallus finished cDNA, clone ChEST87d23. [CR733059]		CN216835	1.9843	0.0639755	Target: CN216835; Description: CN216835 RJA001D03.ab1 RJbrain Gallus gallus cDNA 5', mRNA sequence; Next best Hit: CN216840(alignment length 60bp with 100.00%identity)
ens|ENSGALT00000027004|gb|BU449460|tc|TC382985|tc|TC431085	SLC9A7	1.29828	0.00871113	Sodium/hydrogen exchanger [Source:UniProtKB/TrEMBL;Acc:F1NEV4] [ENSGALT00000027004]		CO759383	2.19489	0.0640324	Target: CO759383; Description: CO759383 brain_EST02575 Brain cDNA Library Gallus gallus cDNA 5', mRNA sequence; Next best Hit: CN216930(alignment length 60bp with 98.33%identity)
	CN221640	2.26408	0.00871909	Target: CN221640; Description: CN221640 RJA078G02.ab1 RJbrain Gallus gallus cDNA 5', mRNA sequence; Next best Hit: CO759394(alignment length 15bp with 100.00%identity)	ens|ENSGALT00000029385|ens|ENSGALT00000029388|ens|ENSGALT00000029390|ens|ENSGALT00000029311	LOC425238	3.16887	0.0641072	Unknown
ref|NM_001199416|ens|ENSGALT00000007092|gb|CR338933	USP34	2.79664	0.00872466	Gallus gallus ubiquitin specific peptidase 34 (USP34), mRNA [NM_001199416]	tc|TC439276	TC439276	1.62157	0.0643027	Rep: PHD finger protein 8 - Homo sapiens (Human), partial (26%) [TC439276]
	CN220288	2.43011	0.00874035	Target: CN220288; Description: CN220288 RJA064F11.ab1 RJbrain Gallus gallus cDNA 5', mRNA sequence; Next best Hit: CN223740(alignment length 14bp with 100.00%identity)		CN217888	2.78996	0.0644029	Target: CN217888; Description: CN217888 RJA020F06.ab1 RJbrain Gallus gallus cDNA 5', mRNA sequence; Next best Hit: A_87_P217408(alignment length 60bp with 98.33%identity)
ref|NM_001030819|ens|ENSGALT00000027309|gb|AJ719382|gb|AM066297	ABCC4	1.32906	0.00876345	Gallus gallus ATP-binding cassette, sub-family C (CFTR/MRP), member 4 (ABCC4), mRNA [NM_001030819]	ref|NM_001030619|ens|ENSGALT00000007299|gb|AJ721016|tc|TC422593	RPS14	2.66058	0.0644136	Gallus gallus ribosomal protein S14 (RPS14), mRNA [NM_001030619]
ref|NM_001007875|ens|ENSGALT00000002258|gb|CR524418|gb|AJ720377	SSU72	1.4552	0.00876509	Gallus gallus SSU72 RNA polymerase II CTD phosphatase homolog (S. cerevisiae) (SSU72), mRNA [NM_001007875]	ref|NM_001030889|ens|ENSGALT00000041207|ens|ENSGALT00000000878|gb|BX935814	FABP3	1.40409	0.0644411	Gallus gallus fatty acid binding protein 3, muscle and heart (mammary-derived growth inhibitor) (FABP3), mRNA [NM_001030889]
gb|CR523904	MPRIP	3.66894	0.00878059	Gallus gallus finished cDNA, clone ChEST909g2. [CR523904]	ref|NM_001079478|ens|ENSGALT00000017955|ens|ENSGALT00000037844|gb|DR419728	CYCS	1.78466	0.0644889	Gallus gallus cytochrome c, somatic (CYCS), nuclear gene encoding mitochondrial protein, mRNA [NM_001079478]
gb|BX933998|tc|TC415420	HOOK3	3.39513	0.00878832	Gallus gallus finished cDNA, clone ChEST5e10. [BX933998]	ref|NM_001159315|ens|ENSGALT00000020453|ens|ENSGALT00000030582|gb|CR389683	PVALB	4.71124	0.0645144	Gallus gallus parvalbumin (PVALB), mRNA [NM_001159315]
gb|L13234|gb|CO768409|tc|TC397781|tc|TC400331	RPL10	1.1896	0.00880098	Gallus gallus Jun-binding protein mRN, 3' end. [L13234]	gb|CR389570|gb|CR523156|tc|TC412383|tc|TC389321	CR389570	1.83751	0.0645771	Gallus gallus finished cDNA, clone ChEST872j10. [CR389570]
ref|NM_001006552|ens|ENSGALT00000014450|gb|CR354321|gb|AJ720886	TTC14	2.47145	0.00880404	Gallus gallus tetratricopeptide repeat domain 14 (TTC14), mRNA [NM_001006552]	gb|BX931846|gb|BX934629	BX931846	2.74679	0.0646967	Gallus gallus finished cDNA, clone ChEST802e15. [BX931846]
gb|CR391147|gb|FG356171|tc|TC397509	CR391147	3.10024	0.0088278	Gallus gallus finished cDNA, clone ChEST200o6. [CR391147]	gb|CR390415|gb|CR406716|tc|TC400093|tc|TC410676	CR390415	1.70958	0.06472	Gallus gallus finished cDNA, clone ChEST273e5. [CR390415]
ref|NM_001198975|ref|NM_001198976|gb|CR524446|tc|TC424029	NRXN1	1.80816	0.00884699	Gallus gallus neurexin 1 (NRXN1), transcript variant 1, mRNA [NM_001198975]	ref|NM_205366|ref|NM_001177309|ens|ENSGALT00000022132|gb|U09350	VIP	1.32142	0.0647626	Gallus gallus vasoactive intestinal peptide (VIP), transcript variant 1, mRNA [NM_205366]
ens|ENSGALT00000011449|gb|CR385830|gb|BU360947|tc|TC414056	ENSGALT00000011449	1.8851	0.00884866	otoancorin [Source:HGNC Symbol;Acc:16378] [ENSGALT00000011449]	ref|NM_001031243|ens|ENSGALT00000003630|gb|AJ720574|tc|TC374584	HIBCH	1.94549	0.0649314	Gallus gallus 3-hydroxyisobutyryl-CoA hydrolase (HIBCH), nuclear gene encoding mitochondrial protein, mRNA [NM_001031243]
tc|TC377966	TC377966	2.55743	0.00887104	Rep: Acetyl-CoA acetyltransferase, mitochondrial precursor (EC 2.3.1.9) (Acetoacetyl-CoA thiolase) (T2). - Gallus gallus, complete [TC377966]	gb|DR424309|tc|TC387510	DR424309	1.9936	0.065074	naw05e11.y1 Chicken eye (hatched). Unnormalized (naw) Gallus gallus cDNA clone naw05e11 5', mRNA sequence [DR424309]
ref|NM_001037826|ens|ENSGALT00000011962|gb|DQ227738|tc|TC375006	NR3C1	3.26788	0.00887728	Gallus gallus nuclear receptor subfamily 3, group C, member 1 (glucocorticoid receptor) (NR3C1), mRNA [NM_001037826]	ref|NM_001206496|gb|L25375|gb|BX936046|gb|BX929868	ALDOC	1.90015	0.0650752	Gallus gallus aldolase C, fructose-bisphosphate (ALDOC), mRNA [NM_001206496]
ens|ENSGALT00000024449|ref|XM_416581	BOC	1.41464	0.00889909	Boc homolog (mouse) [Source:HGNC Symbol;Acc:17173] [ENSGALT00000024449]		CN218086	1.96807	0.0652174	Target: CN218086; Description: CN218086 RJA023G06.ab1 RJbrain Gallus gallus cDNA 5', mRNA sequence; Next best Hit: CN222414(alignment length 60bp with 100.00%identity)
ens|ENSGALT00000013848|ens|ENSGALT00000039047|tc|TC428641|ref|XM_426569	KLF7	1.68873	0.0089003	Kruppel-like factor 7 (ubiquitous) [Source:HGNC Symbol;Acc:6350] [ENSGALT00000013848]	gb|BX935071	BX935071	2.16899	0.0652377	Gallus gallus finished cDNA, clone ChEST70f24. [BX935071]
gb|CR391612|ref|XM_425349	CR391612	1.1486	0.00890469	Gallus gallus finished cDNA, clone ChEST552p7. [CR391612]	ref|NM_001111323|ens|ENSGALT00000027850|ens|ENSGALT00000027846|gb|BX932945	FAT3	1.36332	0.0652791	Gallus gallus FAT tumor suppressor homolog 3 (Drosophila) (FAT3), mRNA [NM_001111323]
	CN224490	1.18253	0.00891524	Target: CN224490; Description: CN224490 RJA101F06.ab1 RJbrain Gallus gallus cDNA 5', mRNA sequence; Next best Hit: CN218149(alignment length 60bp with 98.33%identity)	gb|BX950541|gb|BX934067	BX950541	1.22332	0.0654833	Gallus gallus finished cDNA, clone ChEST568f22. [BX950541]
	CO760251	1.65023	0.00893612	Target: CO760251; Description: CO760251 brain_EST03443 Brain cDNA Library Gallus gallus cDNA 5', mRNA sequence; Next best Hit: CN218314(alignment length 14bp with 100.00%identity)		CN218815	1.22925	0.0655114	Target: CN218815; Description: CN218815 RJA040A03.ab1 RJbrain Gallus gallus cDNA 5', mRNA sequence; Next best Hit: A_87_P097161(alignment length 57bp with 100.00%identity)
gb|CR389120|tc|TC390140	CR389120	2.50253	0.00895608	Gallus gallus finished cDNA, clone ChEST350k21. [CR389120]		CN225320	1.87418	0.065544	Target: CN225320; Description: CN225320 WLA070D11.ab1 WLbrain Gallus gallus cDNA 5', mRNA sequence; Next best Hit: A_87_P217644(alignment length 49bp with 95.92%identity)
gb|CR338742	CR338742	4.25304	0.00897583	Gallus gallus finished cDNA, clone ChEST53f4. [CR338742]	ref|NM_001252029|gb|CR407460|gb|BX929561|gb|CR387350	USMG5	1.48411	0.0655534	Gallus gallus up-regulated during skeletal muscle growth 5 homolog (mouse) (USMG5), mRNA [NM_001252029]
gb|XM_001232491|tc|TC394800|tc|TC393777|ref|XM_422752	XM_001232491	1.61626	0.00897928	PREDICTED: Gallus gallus hypothetical protein LOC770175 (LOC770175), mRNA [XM_001232491]		CO760311	1.2928	0.0657451	Target: CO760311; Description: CO760311 brain_EST03503 Brain cDNA Library Gallus gallus cDNA 5', mRNA sequence; Next best Hit: CN218969(alignment length 14bp with 100.00%identity)
gb|CR385950|tc|TC394841|tc|TC434201	CR385950	1.41479	0.00898827	Gallus gallus finished cDNA, clone ChEST159j9. [CR385950]	ens|ENSGALT00000022642|gb|CR391547|gb|CR385528|gb|BU381375	SEC61A2	1.25661	0.0659041	Uncharacterized protein [Source:UniProtKB/TrEMBL;Acc:F1P4K3] [ENSGALT00000022642]
	CN225849	1.83004	0.00899868	Target: CN225849; Description: CN225849 WLA079F02.ab1 WLbrain Gallus gallus cDNA 5', mRNA sequence; Next best Hit: CN220540(alignment length 15bp with 100.00%identity)	ref|NM_001005819|ens|ENSGALT00000009693|ens|ENSGALT00000009692|gb|AJ720664	BTBD1	1.30005	0.0660563	Gallus gallus BTB (POZ) domain containing 1 (BTBD1), mRNA [NM_001005819]
ens|ENSGALT00000016748|ens|ENSGALT00000016749|gb|CR353017|gb|XM_421273	ENSGALT00000016748	1.27259	0.00899955	ribosomal protein S6 kinase-like 1 [Source:HGNC Symbol;Acc:20222] [ENSGALT00000016748]	ens|ENSGALT00000018795|gb|BX929835|gb|CR353689	APOPT1	2.07236	0.0661509	apoptogenic 1 [Source:HGNC Symbol;Acc:20492] [ENSGALT00000018795]
ens|ENSGALT00000025882|tc|TC424576	BRWD1	2.61338	0.00900369	bromodomain and WD repeat domain containing 1 [Source:HGNC Symbol;Acc:12760] [ENSGALT00000025882]	ref|NM_001005843|ens|ENSGALT00000007087|gb|AJ719669|gb|DR411748	UQCRFS1	1.54045	0.0662974	Gallus gallus ubiquinol-cytochrome c reductase, Rieske iron-sulfur polypeptide 1 (UQCRFS1), nuclear gene encoding mitochondrial protein, mRNA [NM_001005843]
	CO759416	1.48208	0.00900913	Target: CO759416; Description: CO759416 brain_EST02608 Brain cDNA Library Gallus gallus cDNA 5', mRNA sequence; Next best Hit: CO763371(alignment length 60bp with 96.67%identity)		CN223980	1.4556	0.0662978	Target: CN223980; Description: CN223980 RJA098A10.ab1 RJbrain Gallus gallus cDNA 5', mRNA sequence; Next best Hit: CN233334(alignment length 16bp with 100.00%identity)
ref|NM_205270|gb|X61225|gb|CO506112|tc|TC376369	NFIX	1.81881	0.00902566	Gallus gallus nuclear factor I/X (CCAAT-binding transcription factor) (NFIX), mRNA [NM_205270]		CN220541	1.53019	0.0664421	Target: CN220541; Description: CN220541 WLA016H06.ab1 WLbrain Gallus gallus cDNA 5', mRNA sequence; Next best Hit: CN222174(alignment length 60bp with 100.00%identity)
gb|BX935495|tc|TC389515|tc|TC395539|tc|TC436459	C10H15orf17	1.39157	0.00903336	Gallus gallus finished cDNA, clone ChEST859e13. [BX935495]	gb|XM_419574|tc|TC378237	C3H1orf96	1.63077	0.0664635	PREDICTED: Gallus gallus similar to Chromosome 1 open reading frame 96 (LOC421533), mRNA [XM_419574]
ens|ENSGALT00000034137	ENSGALT00000034137	2.43659	0.00905906	Uncharacterized protein [Source:UniProtKB/TrEMBL;Acc:F1NPH5] [ENSGALT00000034137]		CN217373	1.34535	0.0664869	Target: CN217373; Description: CN217373 RJA010D05.ab1 RJbrain Gallus gallus cDNA 5', mRNA sequence; Next best Hit: CN217626(alignment length 60bp with 100.00%identity)
	CN216894	2.50447	0.00907137	Target: CN216894; Description: CN216894 RJA002B08.ab1 RJbrain Gallus gallus cDNA 5', mRNA sequence; Next best Hit: CN224239(alignment length 14bp with 100.00%identity)	ref|NM_001006175|ens|ENSGALT00000012459|gb|AJ719428|tc|TC374644	TRAP1	1.72196	0.0665018	Gallus gallus TNF receptor-associated protein 1 (TRAP1), mRNA [NM_001006175]
gb|CR385653|ref|XM_003641928	CR385653	1.62533	0.00907834	Gallus gallus finished cDNA, clone ChEST844e20. [CR385653]		CO760219	1.57731	0.066649	Target: CO760219; Description: CO760219 brain_EST03411 Brain cDNA Library Gallus gallus cDNA 5', mRNA sequence; Next best Hit: CO759294(alignment length 37bp with 89.19%identity)
gb|CR389454	CR389454	1.28224	0.00907939	Gallus gallus finished cDNA, clone ChEST986j21. [CR389454]	ens|ENSGALT00000029662|gb|BX933214|gb|BX934252|gb|XM_423951	ENSGALT00000029662	1.36831	0.0666845	Uncharacterized protein [Source:UniProtKB/TrEMBL;Acc:F1NNM5] [ENSGALT00000029662]
ens|ENSGALT00000001557|gb|BX935818|tc|TC379255|ref|XM_425887	REXO1	1.58442	0.00909081	Uncharacterized protein [Source:UniProtKB/TrEMBL;Acc:F1P0Z1] [ENSGALT00000001557]	ens|ENSGALT00000036729|ens|ENSGALT00000036730|ens|ENSGALT00000036731|gb|BX931169	ENSGALT00000036729	1.75321	0.0666981	aspartate beta-hydroxylase [Source:HGNC Symbol;Acc:757] [ENSGALT00000036729]
gb|BX929356|tc|TC391664	BX929356	1.75866	0.00910059	Gallus gallus finished cDNA, clone ChEST987n23. [BX929356]	gb|CR390255|gb|BU420698|tc|NP9679679|tc|NP9679659	CR390255	1.62589	0.0667217	Gallus gallus finished cDNA, clone ChEST934e15. [CR390255]
	CN226016	4.32633	0.00910329	Target: CN226016; Description: CN226016 WLA082G09.ab1 WLbrain Gallus gallus cDNA 5', mRNA sequence; Next best Hit: A_87_P310787(alignment length 14bp with 100.00%identity)		CN223350	1.85447	0.0667341	Target: CN223350; Description: CN223350 WLA048G06.ab1 WLbrain Gallus gallus cDNA 5', mRNA sequence; Next best Hit: CN218370(alignment length 26bp with 96.15%identity)
	CN233722	1.26433	0.00911432	Target: CN233722; Description: CN233722 RJA116G06.ab1 RJbrain Gallus gallus cDNA 5', mRNA sequence; Next best Hit: CN218573(alignment length 54bp with 96.30%identity)		CN219778	1.93994	0.0668278	Target: CN219778; Description: CN219778 RJA056H10.ab1 RJbrain Gallus gallus cDNA 5', mRNA sequence; Next best Hit: CN222869(alignment length 61bp with 98.36%identity)
ens|ENSGALT00000021164|ens|ENSGALT00000037575|ref|XM_419676	C3H6orf211	2.58917	0.00911528	chromosome 6 open reading frame 211 [Source:HGNC Symbol;Acc:17872] [ENSGALT00000021164]	ens|ENSGALT00000025318|ens|ENSGALT00000032033|gb|CR390900|tc|TC378762	LOC422895	1.37576	0.0669498	Uncharacterized protein [Source:UniProtKB/TrEMBL;Acc:F1NCM7] [ENSGALT00000025318]
ref|NM_205519|gb|M26064|gb|DR427046|tc|TC410562	ATP2A1	1.96555	0.00913131	Gallus gallus ATPase, Ca++ transporting, cardiac muscle, fast twitch 1 (ATP2A1), mRNA [NM_205519]		CN217429	1.56874	0.0673156	Target: CN217429; Description: CN217429 RJA012B03.ab1 RJbrain Gallus gallus cDNA 5', mRNA sequence; Next best Hit: CN217666(alignment length 60bp with 100.00%identity)
gb|AJ719675	ARL13B	1.14577	0.00913934	Gallus gallus partial mRNA for hypothetical protein, clone 5c18. [AJ719675]	ref|NM_001146141|ens|ENSGALT00000028215|ens|ENSGALT00000029121|ens|ENSGALT00000035902	CHIR-AB1	1.50422	0.067434	Gallus gallus immunoglobulin-like receptor CHIR-AB1 (CHIR-AB1), mRNA [NM_001146141]
ref|NM_204107|ens|ENSGALT00000027985|gb|AF287144|gb|AB088685	UCP3	2.0791	0.00915375	Gallus gallus uncoupling protein 3 (mitochondrial, proton carrier) (UCP3), nuclear gene encoding mitochondrial protein, mRNA [NM_204107]	tc|TC441222|ref|XM_426809	TC441222	1.23878	0.0674381	Rep: WD repeat-containing protein 42A - Homo sapiens (Human), partial (34%) [TC441222]
ens|ENSGALT00000032690|gb|XM_421040|tc|TC386938	EFCAB4B	2.60975	0.00916425	EF-hand calcium binding domain 4A [Source:HGNC Symbol;Acc:28703] [ENSGALT00000032690]	ens|ENSGALT00000024698|gb|XM_419799|tc|TC385458	LACE1	2.14844	0.0675409	lactation elevated 1 [Source:HGNC Symbol;Acc:16411] [ENSGALT00000024698]
gb|CR389284	CR389284	2.45006	0.00918619	Gallus gallus finished cDNA, clone ChEST115n14. [CR389284]		CN219426	1.54011	0.0676142	Target: CN219426; Description: CN219426 WLA006A05.ab1 WLbrain Gallus gallus cDNA 5', mRNA sequence; Next best Hit: CN217935(alignment length 60bp with 95.00%identity)
ens|ENSGALT00000017103|gb|AJ719336|tc|TC383826|ref|XM_003641689	SPATA6	1.10999	0.00919684	spermatogenesis associated 6 [Source:RefSeq peptide;Acc:NP_001026453] [ENSGALT00000017103]	gb|BX929817	BX929817	1.86632	0.0677546	Gallus gallus finished cDNA, clone ChEST549o13. [BX929817]
ref|NM_204097|ens|ENSGALT00000002712|tc|TC373457	ODZ2	2.18086	0.00922334	Gallus gallus odz, odd Oz/ten-m homolog 2 (Drosophila) (ODZ2), transcript variant 1, mRNA [NM_204097]	ref|NM_001006281|ens|ENSGALT00000027937|ens|ENSGALT00000037270|gb|AJ720984	NDUFA9	1.7231	0.067785	Gallus gallus NADH dehydrogenase (ubiquinone) 1 alpha subcomplex, 9, 39kDa (NDUFA9), nuclear gene encoding mitochondrial protein, mRNA [NM_001006281]
	CO760800	2.90558	0.00922479	Target: CO760800; Description: CO760800 brain_EST03992 Brain cDNA Library Gallus gallus cDNA 5', mRNA sequence; Next best Hit: CO759123(alignment length 26bp with 100.00%identity)		CN223267	1.05483	0.0678152	Target: CN223267; Description: CN223267 RJA092E09.ab1 RJbrain Gallus gallus cDNA 5', mRNA sequence; Next best Hit: A_87_P059161(alignment length 14bp with 100.00%identity)
ens|ENSGALT00000039506|ens|ENSGALT00000039503|ens|ENSGALT00000039505|ens|ENSGALT00000039502	UBC	3.66928	0.00923295	Uncharacterized protein [Source:UniProtKB/TrEMBL;Acc:E1BRM2] [ENSGALT00000039506]	ref|NM_001005843|ens|ENSGALT00000007087|gb|AJ719669|gb|DR411748	UQCRFS1	1.65321	0.0679383	Gallus gallus ubiquinol-cytochrome c reductase, Rieske iron-sulfur polypeptide 1 (UQCRFS1), nuclear gene encoding mitochondrial protein, mRNA [NM_001005843]
	AW198356	1.10708	0.00924218	Target: AW198356; Description: AW198356 pnl-b.pk0005.f1 chicken liver cDNA library Gallus gallus cDNA clone pnl-b.pk0005.f1 5', mRNA sequence; Next best Hit: CN219407(alignment length 16bp with 100.00%identity)	ens|ENSGALT00000019560|gb|BX935788|tc|TC377698|ref|XM_420634	MYOZ2	1.87857	0.0681035	myozenin 2 [Source:HGNC Symbol;Acc:1330] [ENSGALT00000019560]
ref|NM_205029|ens|ENSGALT00000036222|ens|ENSGALT00000012448|gb|AF145751	MITF	1.81655	0.00924675	Gallus gallus microphthalmia-associated transcription factor (MITF), mRNA [NM_205029]	ens|ENSGALT00000001044|gb|XM_415706|gb|XM_415707|tc|TC393902	ANGPTL6	2.0768	0.0681685	Uncharacterized protein [Source:UniProtKB/TrEMBL;Acc:E1C2D7] [ENSGALT00000001044]
gb|BX950770|gb|BU266737|tc|TC418170	BX950770	2.33132	0.00926509	Gallus gallus finished cDNA, clone ChEST817h19. [BX950770]	ref|NM_001146141|ref|NM_001031331|ens|ENSGALT00000036205|ens|ENSGALT00000028215	CHIR-AB1	1.55936	0.0682664	Gallus gallus immunoglobulin-like receptor CHIR-AB1 (CHIR-AB1), mRNA [NM_001146141]
gb|CR386059	CR386059	1.95963	0.00927017	Gallus gallus finished cDNA, clone ChEST217j10. [CR386059]	ens|ENSGALT00000015688|gb|XM_001233638|tc|TC377793	GFM1	2.15976	0.068292	Uncharacterized protein [Source:UniProtKB/TrEMBL;Acc:F1NDP6] [ENSGALT00000015688]
gb|BX932958|gb|BX933121	BX932958	1.56741	0.00927498	Gallus gallus finished cDNA, clone ChEST999i22. [BX932958]	gb|BX935598|gb|CR406413|gb|BX934723|tc|TC380594	BX935598	1.75627	0.0683228	Gallus gallus finished cDNA, clone ChEST84p13. [BX935598]
ref|NM_001030994|ens|ENSGALT00000019756|ens|ENSGALT00000019753|gb|AJ719837	ELMO1	1.09738	0.0092766	Gallus gallus engulfment and cell motility 1 (ELMO1), mRNA [NM_001030994]		BG642021	1.74417	0.0683861	Target: BG642021; Description: BG642021 pgl1c.pk002.n17 Chicken liver cDNA library Gallus gallus cDNA clone pgl1c.pk002.n17 ; Next best Hit: CN219076(alignment length 26bp with 96.15%identity)
ref|NM_001012534|ens|ENSGALT00000019502|gb|CR390099|gb|AJ851447	TOB2	1.69174	0.00930126	Gallus gallus transducer of ERBB2, 2 (TOB2), mRNA [NM_001012534]	gb|CR524433|gb|BU397422|tc|TC433529	CR524433	1.08678	0.0684671	Gallus gallus finished cDNA, clone ChEST773j8. [CR524433]
ens|ENSGALT00000038720|gb|CR523623|gb|AJ720355|tc|TC374728	PSMB7	1.29809	0.00932335	proteasome (prosome, macropain) subunit, beta type, 7 [Source:RefSeq peptide;Acc:NP_989728] [ENSGALT00000038720]	ref|NM_001199665|ens|ENSGALT00000014708|gb|CR389985|tc|TC399288	GANC	1.60379	0.0686664	Gallus gallus glucosidase, alpha; neutral C (GANC), mRNA [NM_001199665]
gb|CR389728|gb|CR390471	CR389728	1.89892	0.00932766	Gallus gallus finished cDNA, clone ChEST482k17. [CR389728]		CN220653	2.24637	0.0688102	Target: CN220653; Description: CN220653 RJA067F12.ab1 RJbrain Gallus gallus cDNA 5', mRNA sequence; Next best Hit: CN221246(alignment length 16bp with 100.00%identity)
ref|NM_001195276|gb|BX931655	LOC418120	1.89233	0.00934013	Gallus gallus transmembrane protein 178-like (LOC418120), mRNA [NM_001195276]		CN220751	1.69219	0.0688393	Target: CN220751; Description: CN220751 RJA069B08.ab1 RJbrain Gallus gallus cDNA 5', mRNA sequence; Next best Hit: CO764247(alignment length 17bp with 100.00%identity)
ref|NM_001252121|ens|ENSGALT00000040609|gb|CR406816|gb|CR386858	MACF1	1.95648	0.00934872	Gallus gallus microtubule-actin crosslinking factor 1 (MACF1), mRNA [NM_001252121]		W66535	1.99465	0.0688688	Target: W66535; Description: W66535 EST008 chicken liver cDNA library, Stratagene (cat.#935402) Gallus gallus cDNA clone CLEST052 similar to MEDSA BOWMAN-BIRK TYPE WOUND INDUCED TRYPSIN INHIBITOR, mRNA sequence; Next best Hit: CN219373(alignment length 15
gb|CR523740|tc|TC388687	CR523740	1.3395	0.00936678	Gallus gallus finished cDNA, clone ChEST128i9. [CR523740]		AW198263	1.78618	0.0688831	Target: AW198263; Description: AW198263 pnl-b.pk0001.f8 chicken liver cDNA library Gallus gallus cDNA clone pnl-b.pk0001.f8 ; Next best Hit: A_87_P010107(alignment length 14bp with 100.00%identity)
ref|NM_001079496|ens|ENSGALT00000023348|gb|CR352473|gb|AJ719557	ZNF384	1.35616	0.00936802	Gallus gallus zinc finger protein 384 (ZNF384), mRNA [NM_001079496]	gb|CR385702|gb|CR523124|gb|CR390100|gb|CR353878	BZRAP1	1.59562	0.0689824	Gallus gallus finished cDNA, clone ChEST577h6. [CR385702]
ref|NM_205033|ens|ENSGALT00000040824|ens|ENSGALT00000032638|gb|X80877	NES	2.48599	0.0093905	Gallus gallus nestin (NES), mRNA [NM_205033]	ref|NM_001030696|gb|CR389052|gb|AJ720110|tc|TC429612	NDEL1	1.53671	0.0690133	Gallus gallus nudE nuclear distribution gene E homolog (A. nidulans)-like 1 (NDEL1), mRNA [NM_001030696]
	CO759018	1.36751	0.00939918	Target: CO759018; Description: CO759018 brain_EST02210 Brain cDNA Library Gallus gallus cDNA 5', mRNA sequence; Next best Hit: CO759025(alignment length 60bp with 100.00%identity)	gb|DR411748|tc|TC438683|tc|TC385022	UQCRFS1	1.60268	0.0691296	gPGC_EST01590 Embryonic gonadal PGC cDNA Library Gallus gallus cDNA 5', mRNA sequence [DR411748]
	CO759096	1.46465	0.00940094	Target: CO759096; Description: CO759096 brain_EST02288 Brain cDNA Library Gallus gallus cDNA 5', mRNA sequence; Next best Hit: CO759193(alignment length 60bp with 100.00%identity)		CN218762	1.98457	0.0691914	Target: CN218762; Description: CN218762 RJA039B10.ab1 RJbrain Gallus gallus cDNA 5', mRNA sequence; Next best Hit: A_87_P085751(alignment length 15bp with 100.00%identity)
ens|ENSGALT00000021177|gb|BX934811|tc|NP9673329|ref|XM_423582	CDYL2	3.11085	0.0094213	chromodomain protein, Y-like 2 [Source:HGNC Symbol;Acc:23030] [ENSGALT00000021177]	ens|ENSGALT00000022367	FAM116B	1.64521	0.069331	family with sequence similarity 116, member B [Source:HGNC Symbol;Acc:32690] [ENSGALT00000022367]
tc|TC403455	TC403455	5.76142	0.00942956	Rep: Protocadherin 10 - Danio rerio (Zebrafish) (Brachydanio rerio), partial (23%) [TC403455]	ref|NM_001031556|ens|ENSGALT00000012301|ens|ENSGALT00000039466|gb|AJ719703	PGAM1	1.61231	0.0693423	Gallus gallus phosphoglycerate mutase 1 (brain) (PGAM1), mRNA [NM_001031556]
ens|ENSGALT00000017834|gb|BX933176|gb|XM_416120|tc|TC380317	PPFIA2	3.11281	0.00944526	protein tyrosine phosphatase, receptor type, f polypeptide (PTPRF), interacting protein (liprin), alpha 2 [Source:HGNC Symbol;Acc:9246] [ENSGALT00000017834]	gb|CR391606|tc|TC408471	CR391606	1.58714	0.069426	Gallus gallus finished cDNA, clone ChEST804j15. [CR391606]
tc|TC420185	TC420185	1.81683	0.00946916	Rep: Non-muscle caldesmon (CDM) (L-caldesmon). - Rattus norvegicus, partial (11%) [TC420185]		CN219445	1.54795	0.0694671	Target: CN219445; Description: CN219445 WLA006D01.ab1 WLbrain Gallus gallus cDNA 5', mRNA sequence; Next best Hit: CN217935(alignment length 60bp with 95.00%identity)
gb|CR338879	CR338879	2.41891	0.00949051	Gallus gallus finished cDNA, clone ChEST1026k2. [CR338879]		CN233337	3.61372	0.0695148	Target: CN233337; Description: CN233337 RJA109H04.ab1 RJbrain Gallus gallus cDNA 5', mRNA sequence; Next best Hit: CN217959(alignment length 14bp with 100.00%identity)
ens|ENSGALT00000009669|ens|ENSGALT00000036247|tc|TC407811|ref|XM_001234025	ENSGALT00000009669	4.0084	0.00949456	Uncharacterized protein [Source:UniProtKB/TrEMBL;Acc:F1N802] [ENSGALT00000009669]	ref|NM_001005836|ens|ENSGALT00000003047|gb|AJ720131|tc|TC435087	AARS	1.416	0.0695637	Gallus gallus alanyl-tRNA synthetase (AARS), mRNA [NM_001005836]
	CN222281	2.83479	0.00952469	Target: CN222281; Description: CN222281 RJA084A10.ab1 RJbrain Gallus gallus cDNA 5', mRNA sequence; Next best Hit: CO761280(alignment length 14bp with 100.00%identity)	ens|ENSGALT00000039314|gb|CR406303|tc|TC407748	GPI	1.68208	0.0695919	glucose phosphate isomerase [Source:RefSeq peptide;Acc:NP_001006128] [ENSGALT00000039314]
ref|NM_001199429|gb|CR390098|tc|TC441719|tc|TC420930	NPHP1	1.96575	0.00952703	Gallus gallus nephronophthisis 1 (juvenile) (NPHP1), mRNA [NM_001199429]	gb|XR_026679|tc|TC414281	PCSK1	1.74055	0.0697517	PREDICTED: Gallus gallus similar to PC1 (LOC769230), mRNA [XR_026679]
	CN224533	1.29903	0.00953293	Target: CN224533; Description: CN224533 WLA057C06.ab1 WLbrain Gallus gallus cDNA 5', mRNA sequence; Next best Hit: CN224337(alignment length 15bp with 100.00%identity)		CN233258	1.38425	0.0699378	Target: CN233258; Description: CN233258 RJA108F06.ab1 RJbrain Gallus gallus cDNA 5', mRNA sequence; Next best Hit: CN225120(alignment length 19bp with 94.74%identity)
ref|NM_001008474|ens|ENSGALT00000013242|ens|ENSGALT00000013241|gb|AJ721039	SPATS2L	1.64565	0.00953747	Gallus gallus spermatogenesis associated, serine-rich 2-like (SPATS2L), mRNA [NM_001008474]	ref|NM_001030601|ens|ENSGALT00000036237|ens|ENSGALT00000011199|ens|ENSGALT00000036236	IMPDH2	1.4477	0.0699912	Gallus gallus IMP (inosine 5'-monophosphate) dehydrogenase 2 (IMPDH2), mRNA [NM_001030601]
	CO761959	2.27054	0.00954338	Target: CO761959; Description: CO761959 brain_EST05151 Brain cDNA Library Gallus gallus cDNA 5', mRNA sequence; Next best Hit: CO759068(alignment length 53bp with 98.11%identity)	ens|ENSGALT00000013999|gb|BU302671|tc|TC407184|tc|TC398961	MRPL2	1.88587	0.0703461	mitochondrial ribosomal protein L2 [Source:HGNC Symbol;Acc:14056] [ENSGALT00000013999]
	CN218040	4.86905	0.00956112	Target: CN218040; Description: CN218040 RJA022H04.ab1 RJbrain Gallus gallus cDNA 5', mRNA sequence; Next best Hit: CN218569(alignment length 58bp with 96.55%identity)	ens|ENSGALT00000008944	AKAP1	2.47344	0.0703986	A kinase (PRKA) anchor protein 1 [Source:HGNC Symbol;Acc:367] [ENSGALT00000008944]
gb|CR524456|ref|XM_003640586	CR524456	1.38561	0.00959152	Gallus gallus finished cDNA, clone ChEST141a8. [CR524456]	ens|ENSGALT00000038761|tc|TC419056|ref|XM_422985	RTN4RL2	1.64696	0.0706696	reticulon 4 receptor-like 2 [Source:HGNC Symbol;Acc:23053] [ENSGALT00000038761]
ens|ENSGALT00000040076|gb|CR385423|tc|TC390208|tc|TC391756	LOC769806	2.33419	0.00960869	Uncharacterized protein [Source:UniProtKB/TrEMBL;Acc:E1BZB8] [ENSGALT00000040076]	ens|ENSGALT00000038764	ENSGALT00000038764	1.53719	0.0706791	Uncharacterized protein [Source:UniProtKB/TrEMBL;Acc:F1NXK2] [ENSGALT00000038764]
ref|NM_204116|ens|ENSGALT00000021124|gb|AF521668|gb|BU340646	BASP1	1.97812	0.00961306	Gallus gallus brain abundant, membrane attached signal protein 1 (BASP1), mRNA [NM_204116]	tc|TC377389	TC377389	1.43474	0.0707737	Rep: Multisynthetase complex auxiliary component p43 [Contains: Endothelial monocyte-activating polypeptide 2 (EMAP-II) (Small inducible cytokine subfamily E member 1)]. - Gallus gallus, complete [TC377389]
gb|CR353743|gb|XM_415516|tc|TC380843	LOC417234	5.20481	0.00961728	Gallus gallus finished cDNA, clone ChEST921m18. [CR353743]	ref|NM_001031524|ens|ENSGALT00000018720|gb|AJ720319|gb|CR523631	BRP44L	1.9554	0.0707936	Gallus gallus brain protein 44-like (BRP44L), mRNA [NM_001031524]
gb|CR390102|gb|BU212490	CR390102	3.62326	0.00963073	Gallus gallus finished cDNA, clone ChEST906l4. [CR390102]	ref|NM_001006281|ens|ENSGALT00000027937|ens|ENSGALT00000037270|gb|AJ720984	NDUFA9	1.6051	0.0709155	Gallus gallus NADH dehydrogenase (ubiquinone) 1 alpha subcomplex, 9, 39kDa (NDUFA9), nuclear gene encoding mitochondrial protein, mRNA [NM_001006281]
ref|NM_204787|gb|D13542|tc|TC373445|tc|TC443728	VCAN	2.0491	0.0096391	Gallus gallus versican (VCAN), mRNA [NM_204787]	ref|NM_001080103|ens|ENSGALT00000027657|gb|BX933700|gb|DQ360499	TNFRSF19	2.03907	0.0710036	Gallus gallus tumor necrosis factor receptor superfamily, member 19 (TNFRSF19), mRNA [NM_001080103]
ens|ENSGALT00000009286|tc|TC438362|tc|TC405005|tc|TC395016	ARFGAP1	1.16293	0.00965835	ADP-ribosylation factor GTPase activating protein 1 [Source:RefSeq peptide;Acc:NP_001026028] [ENSGALT00000009286]	gb|XM_416421|tc|TC397240	SLCO1A2	4.22593	0.0713346	PREDICTED: Gallus gallus similar to organic anion transporting polypeptide 1a2 (LOC418190), mRNA [XM_416421]
tc|NP9674381	NP9674381	2.41754	0.00966139	GB	ref|NM_001006462|ens|ENSGALT00000025450|gb|CR391737|gb|AJ719402	IMMT	2.28839	0.07136	Gallus gallus inner membrane protein, mitochondrial (IMMT), nuclear gene encoding mitochondrial protein, mRNA [NM_001006462]
ens|ENSGALT00000029102|tc|TC437711|tc|TC431436|tc|TC386928	ND1	1.82918	0.00966609	NADH-ubiquinone oxidoreductase chain 1 [Source:UniProtKB/Swiss-Prot;Acc:P18936] [ENSGALT00000029102]	ens|ENSGALT00000016534|gb|CO419574|tc|TC385590|ref|XM_426130	TMEM151B	1.48193	0.0715058	transmembrane protein 151B [Source:HGNC Symbol;Acc:21315] [ENSGALT00000016534]
ens|ENSGALT00000035259|tc|TC437466|tc|TC408412|tc|TC405334	ATP8	2.35731	0.00968677	ATP synthase protein 8 [Source:UniProtKB/Swiss-Prot;Acc:P14093] [ENSGALT00000035259]	ref|NM_001031247|ens|ENSGALT00000033730|gb|CR389511|gb|AJ720729	NDUFA10	1.72773	0.0715155	Gallus gallus NADH dehydrogenase (ubiquinone) 1 alpha subcomplex, 10, 42kDa (NDUFA10), nuclear gene encoding mitochondrial protein, mRNA [NM_001031247]
ref|NM_001030851|ens|ENSGALT00000005651|gb|AJ721001|tc|TC374436	PPP1R16B	1.09704	0.00969643	Gallus gallus protein phosphatase 1, regulatory (inhibitor) subunit 16B (PPP1R16B), mRNA [NM_001030851]	gb|CR388723	CR388723	1.62401	0.0715954	Gallus gallus finished cDNA, clone ChEST883d23. [CR388723]
gb|XM_417909|tc|TC376607|tc|TC440115	CEP164	1.69862	0.00970957	PREDICTED: Gallus gallus similar to centrosomal protein 164kDa (LOC419769), mRNA [XM_417909]	ref|NM_205385|gb|CR523888|gb|U15155|gb|U15156	PRSS3	1.17297	0.0715991	Gallus gallus protease, serine, 3 (PRSS3), mRNA [NM_205385]
ens|ENSGALT00000014863|gb|CO772229|tc|NP9667872	GPCPD1	2.02856	0.00971219	glycerophosphocholine phosphodiesterase GDE1 homolog (S. cerevisiae) [Source:HGNC Symbol;Acc:26957] [ENSGALT00000014863]	ref|NM_001031352|ens|ENSGALT00000021613|gb|AJ719650|tc|TC375335	PDK1	1.59561	0.0716506	Gallus gallus pyruvate dehydrogenase kinase, isozyme 1 (PDK1), nuclear gene encoding mitochondrial protein, mRNA [NM_001031352]
	CO762540	2.12006	0.00971322	Target: CO762540; Description: CO762540 brain_EST05732 Brain cDNA Library Gallus gallus cDNA 5', mRNA sequence; Next best Hit: CO763047(alignment length 60bp with 93.33%identity)	ens|ENSGALT00000035733|ens|ENSGALT00000029390|ens|ENSGALT00000029311|ens|ENSGALT00000029310	ENSGALT00000035733	2.06802	0.0716856	Unknown
ref|NM_001195550|ens|ENSGALT00000026925|gb|BX931250|gb|CR354007	AKAP17A	1.61802	0.00971531	Gallus gallus A kinase (PRKA) anchor protein 17A (AKAP17A), mRNA [NM_001195550]	gb|BX950841|gb|AB090806|tc|TC410576|ref|XM_003643445	GYS1	1.88543	0.0720261	Gallus gallus finished cDNA, clone ChEST672m6. [BX950841]
	CN216805	2.01521	0.00971897	Target: CN216805; Description: CN216805 RJA001A04.ab1 RJbrain Gallus gallus cDNA 5', mRNA sequence; Next best Hit: CN217815(alignment length 60bp with 100.00%identity)	ref|NM_204506|ens|ENSGALT00000035232|gb|CR353658|gb|AY208853	DSTYK	1.87564	0.0720387	Gallus gallus dual serine/threonine and tyrosine protein kinase (DSTYK), mRNA [NM_204506]
ref|NM_001252062|gb|CR353612|gb|CO763272|tc|TC390200	ANKS1B	1.6318	0.00972728	Gallus gallus ankyrin repeat and sterile alpha motif domain containing 1B (ANKS1B), mRNA [NM_001252062]	ens|ENSGALT00000004510|tc|TC438712	RUNDC1	1.60456	0.0720495	RUN domain containing 1 [Source:HGNC Symbol;Acc:25418] [ENSGALT00000004510]
ref|NM_001030586|ens|ENSGALT00000004580|gb|CR732952|gb|CR387853	TRAIP	1.46621	0.00973131	Gallus gallus TRAF interacting protein (TRAIP), mRNA [NM_001030586]		CN223839	1.7552	0.0720938	Target: CN223839; Description: CN223839 RJA097E06.ab1 RJbrain Gallus gallus cDNA 5', mRNA sequence; Next best Hit: CN223156(alignment length 60bp with 96.67%identity)
ref|NM_204830|ens|ENSGALT00000017146|gb|AF176675|tc|TC375117	ELAVL4	2.31401	0.00975049	Gallus gallus ELAV (embryonic lethal, abnormal vision, Drosophila)-like 4 (Hu antigen D) (ELAVL4), mRNA [NM_204830]		GT_EA606_A_87_P150798	1.12996	0.0721031	Unknown
ens|ENSGALT00000036814	ENSGALT00000036814	5.37995	0.00976301	Uncharacterized protein [Source:UniProtKB/TrEMBL;Acc:F1NTN8] [ENSGALT00000036814]	gb|BX929507	BX929507	1.65576	0.0722025	Gallus gallus finished cDNA, clone ChEST984h10. [BX929507]
gb|BX931896|tc|TC421157	BX931896	1.96892	0.00976338	Gallus gallus finished cDNA, clone ChEST796m19. [BX931896]	tc|NP9673772	NP9673772	1.07873	0.0723194	GB
ens|ENSGALT00000019146|gb|CR406392|gb|XM_416178|tc|TC379042	LOC417937	1.41986	0.00976884	Uncharacterized protein [Source:UniProtKB/TrEMBL;Acc:E1BSS9] [ENSGALT00000019146]	gb|CR524063|tc|TC437758	CR524063	1.66655	0.0723621	Gallus gallus finished cDNA, clone ChEST1018d8. [CR524063]
ref|NM_001012813|ens|ENSGALT00000019288|gb|CR523758|gb|AJ720836	ATF7IP	1.80111	0.00978374	Gallus gallus activating transcription factor 7 interacting protein (ATF7IP), mRNA [NM_001012813]	ens|ENSGALT00000019447|gb|BX930170|gb|BX930168|ref|XM_416224	MEI1	1.78001	0.0723873	meiosis inhibitor 1 [Source:HGNC Symbol;Acc:28613] [ENSGALT00000019447]
	CN218569	1.62315	0.00980061	Target: CN218569; Description: CN218569 RJA032E07.ab1 RJbrain Gallus gallus cDNA 5', mRNA sequence; Next best Hit: CN233981(alignment length 60bp with 100.00%identity)	ens|ENSGALT00000007631|gb|XM_415498|tc|TC430158|tc|TC423247	PTGES2	1.74678	0.0725251	prostaglandin E synthase 2 [Source:HGNC Symbol;Acc:17822] [ENSGALT00000007631]
gb|CR338870	CR338870	3.35208	0.00980084	Gallus gallus finished cDNA, clone ChEST1016d24. [CR338870]	ref|NM_001099354|tc|TC433548	TRIM7.2	1.45179	0.0725506	Gallus gallus Tripartite motif protein 7 (TRIM7.2), mRNA [NM_001099354]
ens|ENSGALT00000023534|gb|XM_424260|tc|TC432972	FNBP4	1.91237	0.00980966	formin binding protein 4 [Source:HGNC Symbol;Acc:19752] [ENSGALT00000023534]		CN220129	1.43059	0.0726062	Target: CN220129; Description: CN220129 WLA013C05.ab1 WLbrain Gallus gallus cDNA 5', mRNA sequence; Next best Hit: CN220867(alignment length 35bp with 91.43%identity)
ref|NM_204677|ens|ENSGALT00000020542|ens|ENSGALT00000037699|gb|AF224275	BAZ2B	1.73002	0.00982527	Gallus gallus bromodomain adjacent to zinc finger domain, 2B (BAZ2B), mRNA [NM_204677]	ref|NM_001031391|ens|ENSGALT00000036114|gb|AJ719809|tc|TC428553	ATP5B	1.87656	0.0726083	Gallus gallus ATP synthase, H+ transporting, mitochondrial F1 complex, beta polypeptide (ATP5B), nuclear gene encoding mitochondrial protein, mRNA [NM_001031391]
	CN223345	1.11698	0.00982559	Target: CN223345; Description: CN223345 RJA093B10.ab1 RJbrain Gallus gallus cDNA 5', mRNA sequence; Next best Hit: CN225071(alignment length 14bp with 100.00%identity)		CN221031	3.24994	0.0728195	Target: CN221031; Description: CN221031 WLA029E01.ab1 WLbrain Gallus gallus cDNA 5', mRNA sequence; Next best Hit: CO761431(alignment length 16bp with 100.00%identity)
ens|ENSGALT00000039488	ENSGALT00000039488	1.44695	0.00982645	Uncharacterized protein [Source:UniProtKB/TrEMBL;Acc:F1NHF3] [ENSGALT00000039488]	gb|CR387471|tc|TC390666	CR387471	1.67284	0.0728814	Gallus gallus finished cDNA, clone ChEST488o16. [CR387471]
gb|CR353976|gb|BU240049|gb|DR419737|tc|TC405611	CR353976	1.94663	0.00982749	Gallus gallus finished cDNA, clone ChEST98n13. [CR353976]		CN222287	1.84805	0.0730384	Target: CN222287; Description: CN222287 RJA084D04.ab1 RJbrain Gallus gallus cDNA 5', mRNA sequence; Next best Hit: CN217235(alignment length 55bp with 98.18%identity)
gb|AY256906|gb|AF525739|gb|BU392310|tc|TC388759	GCK	2.40953	0.00983159	Gallus gallus pancreatic glucokinase mRNA, partial cds. [AY256906]	ref|NM_205366|ref|NM_001177309|ens|ENSGALT00000022131|ens|ENSGALT00000022132	VIP	1.43675	0.0730581	Gallus gallus vasoactive intestinal peptide (VIP), transcript variant 1, mRNA [NM_205366]
ens|ENSGALT00000009436|tc|NP9667907	ENSGALT00000009436	1.59047	0.00983786	GB		CN221146	1.4346	0.0731067	Target: CN221146; Description: CN221146 RJA072F06.ab1 RJbrain Gallus gallus cDNA 5', mRNA sequence; Next best Hit: A_87_P134773(alignment length 14bp with 100.00%identity)
gb|BX933862|gb|BX932264|gb|AJ452644	DDX46	1.7068	0.00984937	Gallus gallus finished cDNA, clone ChEST915c13. [BX933862]		CN223167	1.72714	0.0733137	Target: CN223167; Description: CN223167 WLA046D10.ab1 WLbrain Gallus gallus cDNA 5', mRNA sequence; Next best Hit: CN219854(alignment length 62bp with 96.77%identity)
	CN217037	1.50779	0.00986023	Target: CN217037; Description: CN217037 RJA004C03.ab1 RJbrain Gallus gallus cDNA 5', mRNA sequence; Next best Hit: CN217170(alignment length 60bp with 100.00%identity)		CN216840	1.78569	0.0733169	Target: CN216840; Description: CN216840 RJA001D08.ab1 RJbrain Gallus gallus cDNA 5', mRNA sequence; Next best Hit: CN218828(alignment length 60bp with 96.67%identity)
ens|ENSGALT00000002496|gb|CR405733|tc|TC430282|tc|TC422155	RPL23	1.22595	0.00989303	Uncharacterized protein [Source:UniProtKB/TrEMBL;Acc:E1BY89] [ENSGALT00000002496]	ens|ENSGALT00000016576|gb|XM_421257|tc|TC440805|tc|TC380054	COQ6	1.35792	0.0735356	coenzyme Q6 homolog, monooxygenase (S. cerevisiae) [Source:HGNC Symbol;Acc:20233] [ENSGALT00000016576]
ref|NM_001135678|ens|ENSGALT00000007444|gb|CR385563|tc|TC388653	ANKRD27	2.41374	0.00994252	Gallus gallus ankyrin repeat domain 27 (VPS9 domain) (ANKRD27), mRNA [NM_001135678]		CN220074	1.10084	0.0735375	Target: CN220074; Description: CN220074 RJA061A08.ab1 RJbrain Gallus gallus cDNA 5', mRNA sequence; Next best Hit: CO761924(alignment length 18bp with 100.00%identity)
ens|ENSGALT00000020213|gb|CR354310|gb|BX930901|ref|XM_422144	SPOPL	1.40563	0.00996124	speckle-type POZ protein-like [Source:HGNC Symbol;Acc:27934] [ENSGALT00000020213]	gb|CR353543|gb|BX263367|tc|TC382884|tc|TC388742	CR353543	2.3621	0.0735657	Gallus gallus finished cDNA, clone ChEST130f19. [CR353543]
ens|ENSGALT00000001006|ens|ENSGALT00000040582|gb|BU399251|gb|BU232553	RNF207	1.41046	0.00997434	ring finger protein 207 [Source:HGNC Symbol;Acc:32947] [ENSGALT00000001006]	ens|ENSGALT00000005127|gb|BX933576|gb|BX933492|ref|XM_003642571	CCDC28B	1.05705	0.0735915	coiled-coil domain containing 28B [Source:HGNC Symbol;Acc:28163] [ENSGALT00000005127]
ref|NM_001030869|ens|ENSGALT00000012712|gb|AJ720338|gb|XR_026832	ZFP64	1.5818	0.00997888	Gallus gallus zinc finger protein 64 homolog (mouse) (ZFP64), mRNA [NM_001030869]	ens|ENSGALT00000038532|gb|X95885|tc|TC425064|tc|TC407649	DGCR2	1.62605	0.0737372	DiGeorge syndrome critical region gene 2 [Source:HGNC Symbol;Acc:2845] [ENSGALT00000038532]
ens|ENSGALT00000017157|gb|XM_419512|tc|TC377757	BIRC6	2.04303	0.00999002	baculoviral IAP repeat containing 6 [Source:HGNC Symbol;Acc:13516] [ENSGALT00000017157]	gb|CR390240|gb|XM_001233577|tc|NP9674366|tc|NP9674370	CR390240	1.45475	0.0738748	Gallus gallus finished cDNA, clone ChEST928d15. [CR390240]
	CN223487	1.81147	0.0100026	Target: CN223487; Description: CN223487 RJA094D03.ab1 RJbrain Gallus gallus cDNA 5', mRNA sequence; Next best Hit: A_87_P021619(alignment length 43bp with 100.00%identity)	ens|ENSGALT00000034778|tc|TC423218|ref|XM_429315	LOC415312	1.7892	0.0741107	Uncharacterized protein [Source:UniProtKB/TrEMBL;Acc:E1BWE9] [ENSGALT00000034778]
gb|CR389572	CR389572	1.80823	0.0100052	Gallus gallus finished cDNA, clone ChEST533h5. [CR389572]	ens|ENSGALT00000037398|ens|ENSGALT00000037397|ens|ENSGALT00000023939|gb|CR406671	RSPO3	1.34515	0.0741523	R-spondin 3 [Source:HGNC Symbol;Acc:20866] [ENSGALT00000037398]
ref|NM_001030871|ens|ENSGALT00000002104|ens|ENSGALT00000035160|ens|ENSGALT00000040349	CDC2L1	2.64418	0.0100383	Gallus gallus cell division cycle 2-like 1 (PITSLRE proteins) (CDC2L1), mRNA [NM_001030871]	ens|ENSGALT00000018408|gb|XM_418750|tc|TC385403|tc|TC416765	ZNF385D	2.6763	0.0742583	zinc finger protein 385D [Source:HGNC Symbol;Acc:26191] [ENSGALT00000018408]
ens|ENSGALT00000040946|ens|ENSGALT00000005862|ens|ENSGALT00000005859	MINPP1	2.3348	0.0100425	multiple inositol polyphosphate histidine phosphatase, 1 [Source:RefSeq peptide;Acc:NP_989975] [ENSGALT00000040946]	gb|BX933309	LOC423162	1.61402	0.0743727	Gallus gallus finished cDNA, clone ChEST191e8. [BX933309]
gb|XM_429081|tc|TC377127	RFXDC2	1.4901	0.0100504	PREDICTED: Gallus gallus regulatory factor X domain containing 2 (RFXDC2), mRNA [XM_429081]	gb|CR406189|tc|TC443403	CR406189	2.5016	0.0744368	Gallus gallus finished cDNA, clone ChEST380f7. [CR406189]
ens|ENSGALT00000010046|gb|CR387074|gb|XM_414205|tc|TC441660	ANKRD11	1.49298	0.0100552	Uncharacterized protein [Source:UniProtKB/TrEMBL;Acc:E1BYW8] [ENSGALT00000010046]		CN218591	4.54958	0.0745063	Target: CN218591; Description: CN218591 RJA032H04.ab1 RJbrain Gallus gallus cDNA 5', mRNA sequence; Next best Hit: CN218635(alignment length 60bp with 100.00%identity)
ref|NM_205150|gb|X74323|tc|TC376683	HOXA2	2.40787	0.0100908	Gallus gallus homeobox A2 (HOXA2), mRNA [NM_205150]	ens|ENSGALT00000011059|gb|BX935306|gb|BX936272|gb|BX933674	CPB1	1.62964	0.0745925	carboxypeptidase B1 (tissue) [Source:HGNC Symbol;Acc:2299] [ENSGALT00000011059]
ref|NM_001199546|ens|ENSGALT00000004648|gb|CR386712|tc|TC430598	JMJD1C	1.18904	0.010112	Gallus gallus jumonji domain containing 1C (JMJD1C), mRNA [NM_001199546]		CN221454	1.79731	0.0746293	Target: CN221454; Description: CN221454 RJA076F06.ab1 RJbrain Gallus gallus cDNA 5', mRNA sequence; Next best Hit: CN221633(alignment length 41bp with 95.12%identity)
gb|BX950328|tc|TC380620|ref|XM_414615	RASGEF1C	1.18343	0.0101165	Gallus gallus finished cDNA, clone ChEST246m8. [BX950328]	ens|ENSGALT00000009866|gb|AJ001488	SCN5A	2.30297	0.0747806	Uncharacterized protein [Source:UniProtKB/TrEMBL;Acc:F1N8I1] [ENSGALT00000009866]
ens|ENSGALT00000036174|gb|XM_001234596|tc|TC382032|tc|TC393853	ENSGALT00000036174	2.20501	0.0101259	PREDICTED: Gallus gallus similar to brefeldin A-inhibited guanine nucleotide-exchange protein 1 (LOC771304), partial mRNA [XM_001234596]	ref|NM_001031192|ens|ENSGALT00000013652|ens|ENSGALT00000038374|gb|AJ851406	DGKZ	1.24415	0.0748531	Gallus gallus diacylglycerol kinase, zeta (DGKZ), mRNA [NM_001031192]
	CN220670	1.817	0.0101463	Target: CN220670; Description: CN220670 RJA068A08.ab1 RJbrain Gallus gallus cDNA 5', mRNA sequence; Next best Hit: CN233229(alignment length 17bp with 100.00%identity)	ens|ENSGALT00000001236|gb|XR_026993|tc|TC420634|ref|XM_003642862	ENSGALT00000001236	1.51669	0.0750578	DOT1-like, histone H3 methyltransferase (S. cerevisiae) [Source:HGNC Symbol;Acc:24948] [ENSGALT00000001236]
gb|CR353372	CR353372	2.89775	0.0101705	Gallus gallus finished cDNA, clone ChEST2i10. [CR353372]		CN219369	2.09655	0.0755784	Target: CN219369; Description: CN219369 WLA004H09.ab1 WLbrain Gallus gallus cDNA 5', mRNA sequence; Next best Hit: CN219930(alignment length 61bp with 96.72%identity)
ens|ENSGALT00000022893|gb|BX932765|gb|BX929604|gb|CR406238	ENSGALT00000022893	1.7877	0.0101767	suppressor of variegation 4-20 homolog 1 (Drosophila) [Source:HGNC Symbol;Acc:24283] [ENSGALT00000022893]	ens|ENSGALT00000040665	ENSGALT00000040665	2.20288	0.075603	Uncharacterized protein [Source:UniProtKB/TrEMBL;Acc:F1P5Y0] [ENSGALT00000040665]
ens|ENSGALT00000024023|tc|TC425425	ENSGALT00000024023	1.68616	0.0101847	chromosome 6 open reading frame 204 [Source:HGNC Symbol;Acc:21638] [ENSGALT00000024023]	ref|NM_001004404|ens|ENSGALT00000038362|ens|ENSGALT00000013712|ens|ENSGALT00000038363	GYLTL1B	1.29639	0.0756149	Gallus gallus glycosyltransferase-like 1B (GYLTL1B), mRNA [NM_001004404]
ens|ENSGALT00000021249|ens|ENSGALT00000023581|ens|ENSGALT00000021261|gb|AF027610	ENSGALT00000021249	1.31912	0.0101888	Uncharacterized protein [Source:UniProtKB/TrEMBL;Acc:F1N8M6] [ENSGALT00000021249]		CN220990	4.37089	0.0759143	Target: CN220990; Description: CN220990 WLA028H01.ab1 WLbrain Gallus gallus cDNA 5', mRNA sequence; Next best Hit: A_87_P175683(alignment length 13bp with 100.00%identity)
ens|ENSGALT00000013711|gb|BX933054|tc|TC381346|ref|XM_421748	CCDC147	3.16159	0.0102156	coiled-coil domain containing 147 [Source:HGNC Symbol;Acc:26676] [ENSGALT00000013711]	ref|NM_001199576|ens|ENSGALT00000008494|tc|TC432723	HHATL	1.89539	0.0759473	Gallus gallus hedgehog acyltransferase-like (HHATL), mRNA [NM_001199576]
	CO762148	1.55585	0.0102156	Target: CO762148; Description: CO762148 brain_EST05340 Brain cDNA Library Gallus gallus cDNA 5', mRNA sequence; Next best Hit: CO759024(alignment length 60bp with 98.33%identity)		CN217222	1.87464	0.0759554	Target: CN217222; Description: CN217222 RJA007B02.ab1 RJbrain Gallus gallus cDNA 5', mRNA sequence; Next best Hit: CN217039(alignment length 14bp with 100.00%identity)
	AW198432	4.26972	0.0102173	Target: AW198432; Description: AW198432 pnl-b.pk0008.b8 chicken liver cDNA library Gallus gallus cDNA clone pnl-b.pk0008.b8 5', mRNA sequence; Next best Hit: CN224137(alignment length 14bp with 100.00%identity)		CN220018	2.36144	0.0761093	Target: CN220018; Description: CN220018 WLA012D01.ab1 WLbrain Gallus gallus cDNA 5', mRNA sequence; Next best Hit: CN220019(alignment length 60bp with 100.00%identity)
ens|ENSGALT00000007428|tc|TC380708|ref|XM_417388	ARFGEF2	2.47417	0.0102294	ADP-ribosylation factor guanine nucleotide-exchange factor 2 (brefeldin A-inhibited) [Source:HGNC Symbol;Acc:15853] [ENSGALT00000007428]	tc|NP9667663	NP9667663	1.3759	0.0762076	GB
	CN221351	3.45572	0.0102364	Target: CN221351; Description: CN221351 RJA075E05.ab1 RJbrain Gallus gallus cDNA 5', mRNA sequence; Next best Hit: CN217971(alignment length 29bp with 96.55%identity)	ref|NM_001030830|ens|ENSGALT00000027680|gb|CR524029|gb|AJ720266	CRYL1	1.19109	0.0762927	Gallus gallus crystallin, lambda 1 (CRYL1), mRNA [NM_001030830]
ens|ENSGALT00000008254|gb|CR354016|gb|BX932904|gb|XR_026843	HMCN1	2.62398	0.0102757	hemicentin 1 [Source:HGNC Symbol;Acc:19194] [ENSGALT00000008254]	ens|ENSGALT00000037394|ens|ENSGALT00000021634|gb|U92977|gb|XM_416431	KCNJ8	1.42897	0.076393	Uncharacterized protein [Source:UniProtKB/TrEMBL;Acc:F1NK63] [ENSGALT00000037394]
ref|NM_001039294|ens|ENSGALT00000026894|gb|CR406378|gb|CR387397	FDFT1	1.37036	0.0102772	Gallus gallus farnesyl-diphosphate farnesyltransferase 1 (FDFT1), mRNA [NM_001039294]	ens|ENSGALT00000023990|tc|TC428003|tc|TC401201	NNT	2.28968	0.0764667	nicotinamide nucleotide transhydrogenase [Source:HGNC Symbol;Acc:7863] [ENSGALT00000023990]
	CO760974	2.61354	0.0102788	Target: CO760974; Description: CO760974 brain_EST04166 Brain cDNA Library Gallus gallus cDNA 5', mRNA sequence; Next best Hit: CO762343(alignment length 58bp with 100.00%identity)	ens|ENSGALT00000001392|gb|BX931272|gb|CR386799|ref|XM_417728	WDTC1	1.51089	0.0764761	WD and tetratricopeptide repeats 1 [Source:HGNC Symbol;Acc:29175] [ENSGALT00000001392]
gb|CR524453	CR524453	1.51571	0.0102978	Gallus gallus finished cDNA, clone ChEST135j5. [CR524453]	ref|NM_205159|ens|ENSGALT00000008744|gb|X13861|gb|X13862	MYL3	3.20856	0.0764818	Gallus gallus myosin, light chain 3, alkali; ventricular, skeletal, slow (MYL3), mRNA [NM_205159]
	CN217010	1.33579	0.0103021	Target: CN217010; Description: CN217010 RJA003G10.ab1 RJbrain Gallus gallus cDNA 5', mRNA sequence; Next best Hit: CN223862(alignment length 13bp with 100.00%identity)		CN225188	4.37986	0.076587	Target: CN225188; Description: CN225188 WLA068E05.ab1 WLbrain Gallus gallus cDNA 5', mRNA sequence; Next best Hit: CN226011(alignment length 60bp with 100.00%identity)
gb|CR389992	CR389992	1.34496	0.0103327	Gallus gallus finished cDNA, clone ChEST1003c8. [CR389992]		CN225366	1.67072	0.0766222	Target: CN225366; Description: CN225366 WLA071B01.ab1 WLbrain Gallus gallus cDNA 5', mRNA sequence; Next best Hit: A_87_P053316(alignment length 18bp with 94.44%identity)
ens|ENSGALT00000015739|gb|CR385561|gb|CR407368|gb|BX934438	RSRC1	1.85473	0.0103728	arginine/serine-rich coiled-coil 1 [Source:HGNC Symbol;Acc:24152] [ENSGALT00000015739]	ens|ENSGALT00000022773|ens|ENSGALT00000013669|gb|BX931781|gb|BX929448	ENSGALT00000022773	1.27974	0.0766523	Uncharacterized protein [Source:UniProtKB/TrEMBL;Acc:E1C1X1] [ENSGALT00000022773]
	CO761416	2.25701	0.0103827	Target: CO761416; Description: CO761416 brain_EST04608 Brain cDNA Library Gallus gallus cDNA 5', mRNA sequence; Next best Hit: CO759018(alignment length 21bp with 95.24%identity)	gb|CR385808|tc|TC405173	CR385808	1.64291	0.0770869	Gallus gallus finished cDNA, clone ChEST69l1. [CR385808]
ens|ENSGALT00000038544|gb|CR406531|gb|XM_415215|tc|TC382585	LOC416924	1.71975	0.0103833	Uncharacterized protein [Source:UniProtKB/TrEMBL;Acc:E1BU67] [ENSGALT00000038544]	gb|XR_026965|tc|TC398418|tc|TC422195|tc|TC416030	SYNJ2	1.69713	0.0772697	PREDICTED: Gallus gallus similar to synaptojanin 2 (LOC421656), mRNA [XR_026965]
ref|NM_204683|gb|CR389875|gb|AJ289697|tc|NP9668808	ZP1	1.56436	0.0103979	Gallus gallus zona pellucida glycoprotein 1 (sperm receptor) (ZP1), mRNA [NM_204683]	ens|ENSGALT00000009300|gb|CR523097|gb|CO635695|tc|TC387622	UQCRC1	1.25827	0.0777326	Uncharacterized protein [Source:UniProtKB/TrEMBL;Acc:F1NAC6] [ENSGALT00000009300]
	CO759349	1.05316	0.0104143	Target: CO759349; Description: CO759349 brain_EST02541 Brain cDNA Library Gallus gallus cDNA 5', mRNA sequence; Next best Hit: CN225500(alignment length 14bp with 100.00%identity)		CN222869	1.59808	0.0777418	Target: CN222869; Description: CN222869 RJA089F12.ab1 RJbrain Gallus gallus cDNA 5', mRNA sequence; Next best Hit: CN219525(alignment length 14bp with 100.00%identity)
ens|ENSGALT00000008713|gb|XM_001232518|tc|TC435612|tc|TC442365	OGT	1.36985	0.0104223	O-linked N-acetylglucosamine (GlcNAc) transferase (UDP-N-acetylglucosamine:polypeptide-N-acetylglucosaminyl transferase) [Source:HGNC Symbol;Acc:8127] [ENSGALT00000008713]		CN219441	2.12148	0.0777755	Target: CN219441; Description: CN219441 WLA006C01.ab1 WLbrain Gallus gallus cDNA 5', mRNA sequence; Next best Hit: A_87_P014617(alignment length 13bp with 100.00%identity)
ens|ENSGALT00000039876|ens|ENSGALT00000011578|gb|BX929477|ref|XM_414927	CYTH3	1.8206	0.0104296	cytohesin 3 [Source:HGNC Symbol;Acc:9504] [ENSGALT00000039876]	gb|CR338747	CR338747	1.14874	0.0779478	Gallus gallus finished cDNA, clone ChEST49o10. [CR338747]
ens|ENSGALT00000023831|ens|ENSGALT00000023830|tc|TC432414|tc|TC424141	ENSGALT00000023831	1.36458	0.0104571	erythrocyte membrane protein band 4.1-like 3 [Source:HGNC Symbol;Acc:3380] [ENSGALT00000023831]	ref|NM_001252029|gb|BX930500|gb|BX929561|gb|CR407460	USMG5	1.57309	0.0779593	Gallus gallus up-regulated during skeletal muscle growth 5 homolog (mouse) (USMG5), mRNA [NM_001252029]
gb|XR_026866|tc|TC433518	XR_026866	1.6746	0.0104765	PREDICTED: Gallus gallus similar to meningioma 1 (LOC416911), mRNA [XR_026866]		CN226011	4.75126	0.0781057	Target: CN226011; Description: CN226011 WLA082G03.ab1 WLbrain Gallus gallus cDNA 5', mRNA sequence; Next best Hit: CN233924(alignment length 60bp with 100.00%identity)
gb|CR389122	GALNTL1	2.44987	0.0105066	Gallus gallus finished cDNA, clone ChEST341j19. [CR389122]	tc|TC437254	TC437254	3.83399	0.0781551	Unknown
gb|CR388868|tc|TC407910	CR388868	1.16934	0.0105084	Gallus gallus finished cDNA, clone ChEST537o15. [CR388868]	ens|ENSGALT00000007881|tc|TC407720|ref|XM_415503	COQ4	2.12128	0.0783327	coenzyme Q4 homolog (S. cerevisiae) [Source:HGNC Symbol;Acc:19693] [ENSGALT00000007881]
	CO759331	2.44844	0.0105105	Target: CO759331; Description: CO759331 brain_EST02523 Brain cDNA Library Gallus gallus cDNA 5', mRNA sequence; Next best Hit: CO759583(alignment length 60bp with 100.00%identity)		CN223527	3.49881	0.0784283	Target: CN223527; Description: CN223527 RJA095A05.ab1 RJbrain Gallus gallus cDNA 5', mRNA sequence; Next best Hit: CN220314(alignment length 15bp with 100.00%identity)
	CO761752	2.4169	0.0105198	Target: CO761752; Description: CO761752 brain_EST04944 Brain cDNA Library Gallus gallus cDNA 5', mRNA sequence; Next best Hit: CN235317(alignment length 14bp with 100.00%identity)		CN217919	1.67498	0.0785288	Target: CN217919; Description: CN217919 RJA021B03.ab1 RJbrain Gallus gallus cDNA 5', mRNA sequence; Next best Hit: A_87_P054911(alignment length 21bp with 90.48%identity)
ens|ENSGALT00000005708|gb|CR390152|gb|XM_425012|tc|TC379049	ENSGALT00000005708	1.33957	0.0105656	Uncharacterized protein [Source:UniProtKB/TrEMBL;Acc:F1NJ66] [ENSGALT00000005708]		BG625269	2.19116	0.0786333	Target: BG625269; Description: BG625269 pgn1c.pk002.c5 Normalized chicken lymphoid cDNA library Gallus gallus cDNA clone pgn1c.pk002.c5 ; Next best Hit: A_87_P204233(alignment length 15bp with 100.00%identity)
ens|ENSGALT00000019277|gb|CR389006|gb|BU408537|ref|XM_003641440	ENSGALT00000019277	1.81883	0.0105755	spectrin repeat containing, nuclear envelope 2 [Source:HGNC Symbol;Acc:17084] [ENSGALT00000019277]	gb|CR390808|gb|CR522884|gb|DR426830|tc|TC435671	CR390808	1.43427	0.0787802	Gallus gallus finished cDNA, clone ChEST459b23. [CR390808]
gb|CR390489	ZCCHC2	2.29631	0.0105948	Gallus gallus finished cDNA, clone ChEST445g21. [CR390489]	ref|NM_001031331|ens|ENSGALT00000029598|ens|ENSGALT00000029597|ens|ENSGALT00000029555	LOC425113	1.67774	0.0787834	Gallus gallus immunoglobulin-like receptor CHIR-AB1-like (LOC425113), mRNA [NM_001031331]
tc|NP9673446	NP9673446	1.1397	0.0106003	GB	ref|NM_205056|ens|ENSGALT00000026684|gb|CR385629|gb|U83249	HADHA	2.29107	0.0788275	Gallus gallus hydroxyacyl-CoA dehydrogenase/3-ketoacyl-CoA thiolase/enoyl-CoA hydratase (trifunctional protein), alpha subunit (HADHA), nuclear gene encoding mitochondrial protein, mRNA [NM_205056]
ens|ENSGALT00000027081|gb|BX934620|gb|CR387290|gb|BU128102	RPL31	1.27081	0.0106221	ribosomal protein L31 [Source:HGNC Symbol;Acc:10334] [ENSGALT00000027081]	ens|ENSGALT00000003016|gb|CR388589|tc|TC402682|tc|TC403662	MDH2	2.14738	0.0788642	Malate dehydrogenase [Source:UniProtKB/TrEMBL;Acc:E1BVT3] [ENSGALT00000003016]
	CN218853	2.04885	0.0106221	Target: CN218853; Description: CN218853 RJA040E09.ab1 RJbrain Gallus gallus cDNA 5', mRNA sequence; Next best Hit: A_87_P152043(alignment length 14bp with 100.00%identity)	gb|XM_001235407|tc|TC383598	XM_001235407	1.54201	0.0788768	PREDICTED: Gallus gallus similar to gag [XM_001235407]
ref|NM_001199596|ens|ENSGALT00000010803|gb|CR386104	BRSK2	3.17332	0.0106312	Gallus gallus BR serine/threonine kinase 2 (BRSK2), mRNA [NM_001199596]	ref|NM_001012534|ens|ENSGALT00000019502|gb|AJ851447|tc|TC407302	TOB2	2.447	0.0789593	Gallus gallus transducer of ERBB2, 2 (TOB2), mRNA [NM_001012534]
ens|ENSGALT00000022835|tc|TC402010|ref|XM_001231475	OXA1L	1.2532	0.0106455	Rep: Inner membrane protein OXA1L, mitochondrial precursor (Oxidase assembly 1-like protein) (OXA1-like protein) (OXA1Hs) (Hsa). - Gallus gallus, partial (97%) [TC402010]	ens|ENSGALT00000027417|gb|BX935210|gb|BX933235|gb|BX929634	DNAJC15	1.93195	0.079096	DnaJ (Hsp40) homolog, subfamily C, member 15 [Source:HGNC Symbol;Acc:20325] [ENSGALT00000027417]
gb|CR338977	CR338977	2.03953	0.0106503	Gallus gallus finished cDNA, clone ChEST951e3. [CR338977]		CN219697	1.69478	0.0792005	Target: CN219697; Description: CN219697 WLA009A03.ab1 WLbrain Gallus gallus cDNA 5', mRNA sequence; Next best Hit: CN225243(alignment length 61bp with 98.36%identity)
gb|BX935455|gb|BX929761|tc|TC407372|ref|XM_003641616	BX935455	1.65571	0.0106549	Gallus gallus finished cDNA, clone ChEST250a13. [BX935455]		CN217011	1.9149	0.0792258	Target: CN217011; Description: CN217011 RJA003G12.ab1 RJbrain Gallus gallus cDNA 5', mRNA sequence; Next best Hit: CN233872(alignment length 15bp with 100.00%identity)
ens|ENSGALT00000026542|gb|CR391038|gb|AF347076	ROCK2	2.43458	0.0106563	Rho-associated, coiled-coil containing protein kinase 2 [Source:HGNC Symbol;Acc:10252] [ENSGALT00000026542]	ref|NM_001030727|ens|ENSGALT00000012884|gb|AJ719552|tc|TC375621	DLD	1.71729	0.0793546	Gallus gallus dihydrolipoamide dehydrogenase (DLD), mRNA [NM_001030727]
ref|NM_204335|ens|ENSGALT00000012977|ens|ENSGALT00000032319|gb|AF330009	DCX	1.84203	0.0106649	Gallus gallus doublecortin (DCX), mRNA [NM_204335]	ens|ENSGALT00000014290|gb|BX950564|gb|BX936158|tc|TC393865	ENSGALT00000014290	1.52072	0.0793773	centrosomal protein 68kDa [Source:HGNC Symbol;Acc:29076] [ENSGALT00000014290]
	CN220818	3.01672	0.0106672	Target: CN220818; Description: CN220818 WLA022A01.ab1 WLbrain Gallus gallus cDNA 5', mRNA sequence; Next best Hit: CN222178(alignment length 14bp with 100.00%identity)	ens|ENSGALT00000013063	MTMR3	1.50151	0.0794301	myotubularin related protein 3 [Source:HGNC Symbol;Acc:7451] [ENSGALT00000013063]
gb|CR385851|gb|BU453599	CR385851	2.16999	0.0106826	Gallus gallus finished cDNA, clone ChEST206e15. [CR385851]		CN223540	1.49641	0.0795774	Target: CN223540; Description: CN223540 RJA095B08.ab1 RJbrain Gallus gallus cDNA 5', mRNA sequence; Next best Hit: CO760057(alignment length 60bp with 100.00%identity)
	CN219669	1.10321	0.0106985	Target: CN219669; Description: CN219669 RJA056A07.ab1 RJbrain Gallus gallus cDNA 5', mRNA sequence; Next best Hit: CN225362(alignment length 60bp with 100.00%identity)	ref|NM_001006685|gb|AJ301879|gb|AJ301878|gb|EU747335	HSPA2	2.22699	0.0796526	Gallus gallus heat shock 70kDa protein 2 (HSPA2), mRNA [NM_001006685]
	CO760450	1.56261	0.0107171	Target: CO760450; Description: CO760450 brain_EST03642 Brain cDNA Library Gallus gallus cDNA 5', mRNA sequence; Next best Hit: CN218440(alignment length 15bp with 100.00%identity)	ens|ENSGALT00000002306|gb|XM_417754|tc|TC414838	FHL3	1.48485	0.079866	four and a half LIM domains 3 [Source:HGNC Symbol;Acc:3704] [ENSGALT00000002306]
	CN217369	1.94074	0.0107192	Target: CN217369; Description: CN217369 RJA010C11.ab1 RJbrain Gallus gallus cDNA 5', mRNA sequence; Next best Hit: A_87_P239683(alignment length 15bp with 100.00%identity)	tc|NP9665100	NP9665100	2.32098	0.0799418	GB
ens|ENSGALT00000033954	ENSGALT00000033954	1.29968	0.0107364	Uncharacterized protein [Source:UniProtKB/TrEMBL;Acc:E1BV87] [ENSGALT00000033954]		CN219920	1.5272	0.0799585	Target: CN219920; Description: CN219920 WLA010H05.ab1 WLbrain Gallus gallus cDNA 5', mRNA sequence; Next best Hit: CN225657(alignment length 14bp with 100.00%identity)
gb|CR387319	CR387319	1.21939	0.0107496	Gallus gallus finished cDNA, clone ChEST341e20. [CR387319]	ens|ENSGALT00000014791|gb|BX932255|gb|D83390	ENSGALT00000014791	1.53532	0.0800369	Uncharacterized protein [Source:UniProtKB/TrEMBL;Acc:F1NGF6] [ENSGALT00000014791]
gb|CR353903	TBC1D9	3.5572	0.01076	Gallus gallus finished cDNA, clone ChEST362i12. [CR353903]	gb|CR523660	CR523660	1.37567	0.0801772	Gallus gallus finished cDNA, clone ChEST828c5. [CR523660]
gb|CR406567	SLC31A1	1.78004	0.010819	Gallus gallus finished cDNA, clone ChEST644c24. [CR406567]	ens|ENSGALT00000012830|tc|TC429951|tc|TC427002|tc|TC389624	DLAT	1.57325	0.0802848	Uncharacterized protein [Source:UniProtKB/TrEMBL;Acc:E1C6N5] [ENSGALT00000012830]
ens|ENSGALT00000006299|gb|CR390912|tc|TC384855|ref|XM_417363	RBPJL	1.80363	0.0108199	recombination signal binding protein for immunoglobulin kappa J region-like [Source:HGNC Symbol;Acc:13761] [ENSGALT00000006299]	gb|CR389954	CR389954	1.7954	0.0802973	Gallus gallus finished cDNA, clone ChEST999a14. [CR389954]
	CO759629	1.45964	0.010832	Target: CO759629; Description: CO759629 brain_EST02821 Brain cDNA Library Gallus gallus cDNA 5', mRNA sequence; Next best Hit: CO761830(alignment length 18bp with 100.00%identity)		CN225913	1.71714	0.0803413	Target: CN225913; Description: CN225913 WLA081B06.ab1 WLbrain Gallus gallus cDNA 5', mRNA sequence; Next best Hit: CN233506(alignment length 61bp with 98.36%identity)
gb|BX935362|tc|TC436917	BX935362	3.40319	0.0108335	Gallus gallus finished cDNA, clone ChEST507e14. [BX935362]	gb|CR389930	CR389930	2.4284	0.080398	Gallus gallus finished cDNA, clone ChEST1002j24. [CR389930]
ref|NM_204922|ens|ENSGALT00000039201|ens|ENSGALT00000010620|ens|ENSGALT00000039195	TNNT3	1.8728	0.010849	Gallus gallus troponin T type 3 (skeletal, fast) (TNNT3), mRNA [NM_204922]		CN224877	2.24013	0.080417	Target: CN224877; Description: CN224877 WLA063E03.ab1 WLbrain Gallus gallus cDNA 5', mRNA sequence; Next best Hit: CN223571(alignment length 18bp with 94.44%identity)
gb|CR353871	CR353871	1.8281	0.0108521	Gallus gallus finished cDNA, clone ChEST211a22. [CR353871]		A_87_P118533	1.33333	0.0804401	; Next best Hit: CN217331(alignment length 60bp with 100.00%identity)
gb|XM_421354|tc|TC379834	BCL11B	1.46289	0.0108589	PREDICTED: Gallus gallus B-cell CLL [XM_421354]	tc|NP9665748	NP9665748	1.94507	0.0805863	GB
	CO759135	1.36412	0.0108728	Target: CO759135; Description: CO759135 brain_EST02327 Brain cDNA Library Gallus gallus cDNA 5', mRNA sequence; Next best Hit: CO759859(alignment length 59bp with 96.61%identity)	ens|ENSGALT00000009500|gb|BX934182|gb|CR391022|gb|XM_001233248	SQSTM1	1.90096	0.080798	sequestosome 1 [Source:HGNC Symbol;Acc:11280] [ENSGALT00000009500]
	CO762033	4.91765	0.0108961	Target: CO762033; Description: CO762033 brain_EST05225 Brain cDNA Library Gallus gallus cDNA 5', mRNA sequence; Next best Hit: CO759171(alignment length 19bp with 100.00%identity)	ens|ENSGALT00000003162|gb|BX930426|tc|TC417643|ref|XM_414705	NDUFB6	1.39211	0.0808389	NADH dehydrogenase (ubiquinone) 1 beta subcomplex, 6, 17kDa [Source:HGNC Symbol;Acc:7701] [ENSGALT00000003162]
ens|ENSGALT00000016174|ref|XM_419455	PLEKHH2	1.10915	0.0108981	pleckstrin homology domain containing, family H (with MyTH4 domain) member 2 [Source:HGNC Symbol;Acc:30506] [ENSGALT00000016174]	ref|NM_001031556|ens|ENSGALT00000012301|ens|ENSGALT00000039466|gb|AJ719703	PGAM1	1.58	0.0810831	Gallus gallus phosphoglycerate mutase 1 (brain) (PGAM1), mRNA [NM_001031556]
ens|ENSGALT00000017295|gb|DR417295	ZCCHC11	2.49839	0.0109001	zinc finger, CCHC domain containing 11 [Source:HGNC Symbol;Acc:28981] [ENSGALT00000017295]	ens|ENSGALT00000036313	ATP5A1W	2.22234	0.0810968	ATP synthase subunit alphaUncharacterized protein [Source:UniProtKB/TrEMBL;Acc:Q90VX2] [ENSGALT00000036313]
	CO760161	1.57592	0.0109097	Target: CO760161; Description: CO760161 brain_EST03353 Brain cDNA Library Gallus gallus cDNA 5', mRNA sequence; Next best Hit: CO760212(alignment length 60bp with 100.00%identity)	ens|ENSGALT00000029662|gb|BX934252|ref|XM_003642198	ENSGALT00000029662	1.47961	0.0811496	Uncharacterized protein [Source:UniProtKB/TrEMBL;Acc:F1NNM5] [ENSGALT00000029662]
ens|ENSGALT00000032690|gb|XM_421040|tc|TC386938	EFCAB4B	2.56697	0.0109114	EF-hand calcium binding domain 4A [Source:HGNC Symbol;Acc:28703] [ENSGALT00000032690]		CN222952	1.90155	0.0812031	Target: CN222952; Description: CN222952 WLA044F07.ab1 WLbrain Gallus gallus cDNA 5', mRNA sequence; Next best Hit: CO761656(alignment length 60bp with 96.67%identity)
ens|ENSGALT00000003005|tc|TC417376|tc|TC379776|ref|XM_414505	CCDC99	1.49502	0.0109115	coiled-coil domain containing 99 [Source:HGNC Symbol;Acc:26010] [ENSGALT00000003005]	ref|NM_205159|ens|ENSGALT00000008744|gb|X13861|gb|X13862	MYL3	3.24722	0.0813102	Gallus gallus myosin, light chain 3, alkali; ventricular, skeletal, slow (MYL3), mRNA [NM_205159]
	CN217128	1.50072	0.0109243	Target: CN217128; Description: CN217128 RJA005G02.ab1 RJbrain Gallus gallus cDNA 5', mRNA sequence; Next best Hit: CN217924(alignment length 60bp with 100.00%identity)		CN220673	1.55833	0.0813319	Target: CN220673; Description: CN220673 RJA068B01.ab1 RJbrain Gallus gallus cDNA 5', mRNA sequence; Next best Hit: CN222754(alignment length 15bp with 100.00%identity)
	BG641584	1.42393	0.0109275	Target: BG641584; Description: BG641584 pgl1c.pk001.g24 Chicken liver cDNA library Gallus gallus cDNA clone pgl1c.pk001.g24 ; Next best Hit: A_87_P026198(alignment length 13bp with 100.00%identity)	ens|ENSGALT00000034912|ens|ENSGALT00000034913|gb|CR733187|gb|XM_429669	ENSGALT00000034912	1.83121	0.0813938	Uncharacterized protein [Source:UniProtKB/TrEMBL;Acc:E1BTT9] [ENSGALT00000034912]
ref|NM_204518|ens|ENSGALT00000032997|ens|ENSGALT00000015551|gb|AJ532587	SMC4	1.17517	0.0109392	Gallus gallus structural maintenance of chromosomes 4 (SMC4), mRNA [NM_204518]		CN233689	1.64691	0.0814953	Target: CN233689; Description: CN233689 RJA116D02.ab1 RJbrain Gallus gallus cDNA 5', mRNA sequence; Next best Hit: CN223462(alignment length 15bp with 100.00%identity)
	GT_EA606_A_87_P303963	2.07729	0.0109462	Unknown		CN217077	1.86694	0.0815511	Target: CN217077; Description: CN217077 RJA004G06.ab1 RJbrain Gallus gallus cDNA 5', mRNA sequence; Next best Hit: CN221705(alignment length 60bp with 100.00%identity)
ens|ENSGALT00000036945|ens|ENSGALT00000024401|gb|XM_416572|tc|TC382382	ENSGALT00000036945	3.17826	0.0109489	KIAA1407 [Source:HGNC Symbol;Acc:29272] [ENSGALT00000036945]	gb|CR523033|tc|TC402391|ref|XM_003642209	LOC416951	1.47004	0.0817153	Gallus gallus finished cDNA, clone ChEST898k7. [CR523033]
gb|CR387635	CR387635	1.0653	0.0109534	Gallus gallus finished cDNA, clone ChEST48p5. [CR387635]	tc|NP9677841	NP9677841	1.33553	0.081746	GB
	CN216893	2.3794	0.010955	Target: CN216893; Description: CN216893 RJA002B07.ab1 RJbrain Gallus gallus cDNA 5', mRNA sequence; Next best Hit: CN218031(alignment length 60bp with 100.00%identity)	gb|CR387721	CR387721	1.24064	0.0819093	Gallus gallus finished cDNA, clone ChEST530m23. [CR387721]
ens|ENSGALT00000040276|gb|CR391224|gb|XM_420909|tc|TC390218	NAV2	2.63627	0.0110154	neuron navigator 2 [Source:HGNC Symbol;Acc:15997] [ENSGALT00000040276]	ens|ENSGALT00000006927|gb|BX932524|gb|BX936193|gb|XM_422273	LOC424430	1.80302	0.0819307	Uncharacterized protein [Source:UniProtKB/TrEMBL;Acc:F1NVJ2] [ENSGALT00000006927]
gb|CR385655|tc|TC435221|tc|TC433001	CR385655	1.39547	0.0110154	Gallus gallus finished cDNA, clone ChEST386j20. [CR385655]	ref|NM_001030577|ens|ENSGALT00000039002|ens|ENSGALT00000009231|ens|ENSGALT00000039004	COX4I1	1.35161	0.0827802	Gallus gallus cytochrome c oxidase subunit IV isoform 1 (COX4I1), nuclear gene encoding mitochondrial protein, mRNA [NM_001030577]
	CO761559	1.44642	0.0110259	Target: CO761559; Description: CO761559 brain_EST04751 Brain cDNA Library Gallus gallus cDNA 5', mRNA sequence; Next best Hit: CO762980(alignment length 34bp with 100.00%identity)		CN234450	1.8503	0.0828217	Target: CN234450; Description: CN234450 WLA097G04.ab1 WLbrain Gallus gallus cDNA 5', mRNA sequence; Next best Hit: CN225894(alignment length 15bp with 100.00%identity)
	CO759521	1.79429	0.0110569	Target: CO759521; Description: CO759521 brain_EST02713 Brain cDNA Library Gallus gallus cDNA 5', mRNA sequence; Next best Hit: CO759574(alignment length 59bp with 94.92%identity)	gb|CR354145|gb|CR385552|gb|CO759867|tc|TC380113	CR354145	1.48629	0.08299	Gallus gallus finished cDNA, clone ChEST383o16. [CR354145]
ens|ENSGALT00000032239	ENSGALT00000032239	1.3621	0.0110594	Uncharacterized protein [Source:UniProtKB/TrEMBL;Acc:E1C4G4] [ENSGALT00000032239]	ref|NM_001031382|gb|AJ720527|tc|TC431606|tc|TC374267	OGDH	1.91431	0.0830267	Gallus gallus oxoglutarate (alpha-ketoglutarate) dehydrogenase (lipoamide) (OGDH), nuclear gene encoding mitochondrial protein, mRNA [NM_001031382]
gb|CR389286|gb|BU138213	CR389286	2.05741	0.0110815	Gallus gallus finished cDNA, clone ChEST117k2. [CR389286]	ens|ENSGALT00000015057|tc|TC422377	ENSGALT00000015057	1.81635	0.0831523	phospholipase D1, phosphatidylcholine-specific [Source:HGNC Symbol;Acc:9067] [ENSGALT00000015057]
tc|TC381343|ref|XM_003642455|ref|XM_003643235|ref|XM_417321	TC381343	1.17633	0.0110849	Rep: Alpha2,3-sialyltransferase - Xenopus laevis (African clawed frog), partial (59%) [TC381343]		CN219092	1.33169	0.0834026	Target: CN219092; Description: CN219092 RJA048H11.ab1 RJbrain Gallus gallus cDNA 5', mRNA sequence; Next best Hit: A_87_P101061(alignment length 40bp with 95.00%identity)
	CN222871	1.69723	0.0110989	Target: CN222871; Description: CN222871 RJA089G01.ab1 RJbrain Gallus gallus cDNA 5', mRNA sequence; Next best Hit: BG641682(alignment length 61bp with 98.36%identity)		CN216927	1.73994	0.0834433	Target: CN216927; Description: CN216927 RJA002F03.ab1 RJbrain Gallus gallus cDNA 5', mRNA sequence; Next best Hit: CN222984(alignment length 16bp with 100.00%identity)
ref|NM_001031337|ens|ENSGALT00000025801|gb|AJ851727|tc|TC373564	STK3	1.68227	0.0111048	Gallus gallus serine/threonine kinase 3 (STK3), mRNA [NM_001031337]	gb|BX934379|gb|BX935147	BX934379	2.55846	0.0835533	Gallus gallus finished cDNA, clone ChEST669d15. [BX934379]
ens|ENSGALT00000017352|ens|ENSGALT00000037635|ref|XM_003641309|ref|XM_421312	FOXN3	3.97588	0.0111145	forkhead box N3 [Source:HGNC Symbol;Acc:1928] [ENSGALT00000017352]	ref|NM_001006511|ens|ENSGALT00000004557|ens|ENSGALT00000040068|gb|AJ720541	ACADL	1.41308	0.0840241	Gallus gallus acyl-CoA dehydrogenase, long chain (ACADL), nuclear gene encoding mitochondrial protein, mRNA [NM_001006511]
ens|ENSGALT00000024167|gb|XM_425525|tc|TC381915	C1H3orf15	3.31016	0.011126	chromosome 3 open reading frame 15 [Source:HGNC Symbol;Acc:24010] [ENSGALT00000024167]	gb|AB264054|gb|AB264055|gb|AB264056|gb|AB300419	TTN	1.41308	0.0842165	Gallus gallus TTN mRNA for connectin, partial cds, clone: Ch31. [AB264054]
ref|NM_001080861|gb|AJ719324|tc|TC373631	EIF4H	2.61058	0.011137	Gallus gallus eukaryotic translation initiation factor 4H (EIF4H), mRNA [NM_001080861]		CN217622	1.47469	0.0845315	Target: CN217622; Description: CN217622 RJA015E05.ab1 RJbrain Gallus gallus cDNA 5', mRNA sequence; Next best Hit: CN224131(alignment length 60bp with 100.00%identity)
ens|ENSGALT00000002328	FN3K	1.44187	0.0111694	fructosamine 3 kinase [Source:HGNC Symbol;Acc:24822] [ENSGALT00000002328]		CN225352	1.84909	0.0846386	Target: CN225352; Description: CN225352 WLA070H09.ab1 WLbrain Gallus gallus cDNA 5', mRNA sequence; Next best Hit: CN221220(alignment length 25bp with 96.00%identity)
gb|XM_415157	KNTC1	1.26428	0.0112227	PREDICTED: Gallus gallus similar to Kinetochore-associated protein 1 (Rough deal homolog) (hRod) (HsROD) (Rod) (LOC416865), mRNA [XM_415157]		CN236360	1.55115	0.0846759	Target: CN236360; Description: CN236360 WLA110G01.ab1 WLbrain Gallus gallus cDNA 5', mRNA sequence; Next best Hit: CO759504(alignment length 15bp with 100.00%identity)
	CN221342	1.45968	0.0112447	Target: CN221342; Description: CN221342 WLA031C01.ab1 WLbrain Gallus gallus cDNA 5', mRNA sequence; Next best Hit: CN219921(alignment length 45bp with 95.56%identity)	ens|ENSGALT00000038457|gb|BU447977|tc|TC384516	HPDL	1.33874	0.0847653	4-hydroxyphenylpyruvate dioxygenase-like [Source:HGNC Symbol;Acc:28242] [ENSGALT00000038457]
ens|ENSGALT00000019158	TOPBP1	1.64702	0.0112551	topoisomerase (DNA) II binding protein 1 [Source:HGNC Symbol;Acc:17008] [ENSGALT00000019158]		CN217887	1.48755	0.0847868	Target: CN217887; Description: CN217887 RJA020F05.ab1 RJbrain Gallus gallus cDNA 5', mRNA sequence; Next best Hit: CO762397(alignment length 14bp with 100.00%identity)
	CN221166	2.63955	0.0112573	Target: CN221166; Description: CN221166 RJA073A08.ab1 RJbrain Gallus gallus cDNA 5', mRNA sequence; Next best Hit: CN218371(alignment length 59bp with 100.00%identity)	ref|NM_001008456|ens|ENSGALT00000014351|gb|AJ721082|tc|TC374648	LGALSL	2.32375	0.0848307	Gallus gallus lectin, galactoside-binding-like (LGALSL), mRNA [NM_001008456]
tc|NP9675799	NP9675799	2.08415	0.0112749	GB	ens|ENSGALT00000013828|gb|CR385362|tc|TC434068|tc|TC414116	CCNYL1	1.41958	0.0848362	Uncharacterized protein [Source:UniProtKB/TrEMBL;Acc:F1P0V0] [ENSGALT00000013828]
gb|CR406093	CR406093	1.49976	0.0112817	Gallus gallus finished cDNA, clone ChEST973h16. [CR406093]	gb|CR385708	CR385708	1.73506	0.0849684	Gallus gallus finished cDNA, clone ChEST876d11. [CR385708]
ens|ENSGALT00000025061|gb|XM_426352|tc|TC407091	TADA2B	1.40913	0.0112845	transcriptional adaptor 2B [Source:HGNC Symbol;Acc:30781] [ENSGALT00000025061]		CN222628	2.09475	0.0850743	Target: CN222628; Description: CN222628 RJA087G11.ab1 RJbrain Gallus gallus cDNA 5', mRNA sequence; Next best Hit: CO762136(alignment length 15bp with 100.00%identity)
ens|ENSGALT00000027129	GCC2	1.8618	0.0112895	GRIP and coiled-coil domain containing 2 [Source:HGNC Symbol;Acc:23218] [ENSGALT00000027129]		CN220866	1.59436	0.0853827	Target: CN220866; Description: CN220866 WLA025A10.ab1 WLbrain Gallus gallus cDNA 5', mRNA sequence; Next best Hit: CN220867(alignment length 60bp with 98.33%identity)
	CN221318	2.35086	0.011311	Target: CN221318; Description: CN221318 WLA031A09.ab1 WLbrain Gallus gallus cDNA 5', mRNA sequence; Next best Hit: CN235672(alignment length 24bp with 100.00%identity)	gb|CR390198|gb|XM_415606|tc|TC393909	NARF	2.88673	0.0855464	Gallus gallus finished cDNA, clone ChEST920k17. [CR390198]
	CN217076	2.56386	0.0113137	Target: CN217076; Description: CN217076 RJA004G05.ab1 RJbrain Gallus gallus cDNA 5', mRNA sequence; Next best Hit: CN217394(alignment length 60bp with 100.00%identity)		CN218291	1.37741	0.0855836	Target: CN218291; Description: CN218291 RJA028A02.ab1 RJbrain Gallus gallus cDNA 5', mRNA sequence; Next best Hit: A_87_P118533(alignment length 52bp with 96.15%identity)
ref|NM_001177738|ens|ENSGALT00000038471|gb|GU907099|tc|TC405343	FSCN2	1.74996	0.0113256	Gallus gallus fascin homolog 2, actin-bundling protein, retinal (Strongylocentrotus purpuratus) (FSCN2), mRNA [NM_001177738]	ens|ENSGALT00000041149	ENSGALT00000041149	1.29359	0.0856849	Uncharacterized protein [Source:UniProtKB/TrEMBL;Acc:E1BYE5] [ENSGALT00000041149]
gb|CR385507	CR385507	1.45444	0.0113358	Gallus gallus finished cDNA, clone ChEST378b15. [CR385507]	ens|ENSGALT00000007592|tc|TC392864	DHRS7B	1.86325	0.0857798	Uncharacterized protein [Source:UniProtKB/TrEMBL;Acc:F1NH35] [ENSGALT00000007592]
ref|NM_204367|ens|ENSGALT00000021610|gb|AY139091|gb|BX935023	RHBG	1.58669	0.0113613	Gallus gallus Rh family, B glycoprotein (RHBG), mRNA [NM_204367]		CN223429	1.6114	0.0858054	Target: CN223429; Description: CN223429 WLA049E04.ab1 WLbrain Gallus gallus cDNA 5', mRNA sequence; Next best Hit: CK610136(alignment length 57bp with 96.49%identity)
ens|ENSGALT00000036776|gb|CD762391	ENSGALT00000036776	2.70501	0.0113698	Uncharacterized protein [Source:UniProtKB/TrEMBL;Acc:F1N8R2] [ENSGALT00000036776]	ens|ENSGALT00000003016|gb|CR388589|tc|TC403662|tc|TC384891	MDH2	2.12095	0.085914	Malate dehydrogenase [Source:UniProtKB/TrEMBL;Acc:E1BVT3] [ENSGALT00000003016]
	CO760469	3.15752	0.0113851	Target: CO760469; Description: CO760469 brain_EST03661 Brain cDNA Library Gallus gallus cDNA 5', mRNA sequence; Next best Hit: BG641993(alignment length 60bp with 100.00%identity)	gb|BX930316|tc|TC397939	BX930316	1.24244	0.0859936	Gallus gallus finished cDNA, clone ChEST587j16. [BX930316]
gb|CR385245|ref|XR_140085	CR385245	1.37446	0.0113861	Gallus gallus finished cDNA, clone ChEST789p11. [CR385245]	ref|NM_205321|ens|ENSGALT00000012100|gb|CR338995|gb|X15636	GOT1	2.16094	0.0865602	Gallus gallus glutamic-oxaloacetic transaminase 1, soluble (aspartate aminotransferase 1) (GOT1), mRNA [NM_205321]
ref|NM_001177357|ens|ENSGALT00000012520|tc|TC381926|tc|TC404393	ARHGAP21	2.57449	0.011387	Gallus gallus Rho GTPase activating protein 21 (ARHGAP21), mRNA [NM_001177357]	gb|CR524060	CR524060	1.43756	0.0868882	Gallus gallus finished cDNA, clone ChEST1024b4. [CR524060]
ens|ENSGALT00000002623	MED1	1.5219	0.0113905	mediator complex subunit 1 [Source:HGNC Symbol;Acc:9234] [ENSGALT00000002623]		CO761660	1.50934	0.0869958	Target: CO761660; Description: CO761660 brain_EST04852 Brain cDNA Library Gallus gallus cDNA 5', mRNA sequence; Next best Hit: A_87_P312142(alignment length 14bp with 100.00%identity)
gb|XM_415261|tc|TC392885|tc|TC383999	LOC416968	1.17019	0.0114308	PREDICTED: Gallus gallus similar to presenilin-like protein 4 (LOC416968), mRNA [XM_415261]	ref|NM_204188|ens|ENSGALT00000019494|gb|AJ719273|gb|AF428141	ACO2	1.80558	0.0871725	Gallus gallus aconitase 2, mitochondrial (ACO2), nuclear gene encoding mitochondrial protein, mRNA [NM_204188]
ens|ENSGALT00000010764|gb|BU299132|tc|TC387055|tc|TC412875	MAP3K13	2.29065	0.0114317	mitogen-activated protein kinase kinase kinase 13 [Source:HGNC Symbol;Acc:6852] [ENSGALT00000010764]	ens|ENSGALT00000006182|gb|CR405962|gb|BX950245|tc|TC426351	SGCD	1.568	0.0871895	sarcoglycan, delta (35kDa dystrophin-associated glycoprotein) [Source:HGNC Symbol;Acc:10807] [ENSGALT00000006182]
ref|NM_001199596|ens|ENSGALT00000010803|gb|CR386104	BRSK2	3.0473	0.011442	Gallus gallus BR serine/threonine kinase 2 (BRSK2), mRNA [NM_001199596]		CN225243	1.56981	0.0872093	Target: CN225243; Description: CN225243 WLA069D03.ab1 WLbrain Gallus gallus cDNA 5', mRNA sequence; Next best Hit: A_87_P114218(alignment length 14bp with 100.00%identity)
ref|NM_001012546|ens|ENSGALT00000027993|gb|AJ851710|tc|TC412525	PLEKHB1	2.44135	0.0114441	Gallus gallus pleckstrin homology domain containing, family B (evectins) member 1 (PLEKHB1), mRNA [NM_001012546]	ref|NM_001162405|ens|ENSGALT00000006465|gb|FJ883174|gb|BU483679	GPER	2.6092	0.0874066	Gallus gallus G protein-coupled estrogen receptor 1 (GPER), mRNA [NM_001162405]
ref|NM_001007479|ens|ENSGALT00000012495|gb|AJ720803|tc|TC443265	RPL4	1.27221	0.011455	Gallus gallus ribosomal protein L4 (RPL4), mRNA [NM_001007479]	gb|CR390361|tc|TC419672	CR390361	1.74008	0.0874937	Gallus gallus finished cDNA, clone ChEST940g7. [CR390361]
	CN218827	1.86564	0.011456	Target: CN218827; Description: CN218827 RJA040B08.ab1 RJbrain Gallus gallus cDNA 5', mRNA sequence; Next best Hit: A_87_P064841(alignment length 13bp with 100.00%identity)		CN222331	1.48216	0.0877619	Target: CN222331; Description: CN222331 WLA040B05.ab1 WLbrain Gallus gallus cDNA 5', mRNA sequence; Next best Hit: CN225099(alignment length 60bp with 100.00%identity)
ref|NM_001130488|ens|ENSGALT00000017589|tc|TC430436	PPAP2B	2.85456	0.0114692	Gallus gallus phosphatidic acid phosphatase type 2B (PPAP2B), mRNA [NM_001130488]	ref|NM_001031243|ens|ENSGALT00000003630|gb|AJ720574|tc|TC406346	HIBCH	1.69829	0.0879145	Gallus gallus 3-hydroxyisobutyryl-CoA hydrolase (HIBCH), nuclear gene encoding mitochondrial protein, mRNA [NM_001031243]
gb|CR524439|gb|BU274059|tc|TC406035	CR524439	2.21206	0.0114704	Gallus gallus finished cDNA, clone ChEST778l16. [CR524439]	ref|NM_204286|ens|ENSGALT00000039578|ens|ENSGALT00000023604|ens|ENSGALT00000039579	ATP5A1	2.15712	0.0879673	Gallus gallus ATP synthase, H+ transporting, mitochondrial F1 complex, alpha subunit 1, cardiac muscle (ATP5A1), nuclear gene encoding mitochondrial protein, mRNA [NM_204286]
gb|XR_026995|tc|TC427064|tc|TC435014|ref|XM_003641746	XR_026995	2.13393	0.0114916	PREDICTED: Gallus gallus similar to IGF-II mRNA-binding protein 2 (LOC424865), mRNA [XR_026995]		CN218424	1.5977	0.0881246	Target: CN218424; Description: CN218424 RJA030A01.ab1 RJbrain Gallus gallus cDNA 5', mRNA sequence; Next best Hit: CN217625(alignment length 60bp with 93.33%identity)
gb|CR388755|gb|CR390820|gb|XM_001233126|tc|TC378844	HNRNPA3	1.0428	0.0115014	Gallus gallus finished cDNA, clone ChEST875p24. [CR388755]	ref|NM_001006321|ens|ENSGALT00000012795|gb|CR405813|gb|AJ720714	SDHD	1.44451	0.0882557	Gallus gallus succinate dehydrogenase complex, subunit D, integral membrane protein (SDHD), nuclear gene encoding mitochondrial protein, mRNA [NM_001006321]
	CN219486	2.97756	0.0115056	Target: CN219486; Description: CN219486 WLA006H11.ab1 WLbrain Gallus gallus cDNA 5', mRNA sequence; Next best Hit: CN233880(alignment length 60bp with 100.00%identity)		CN217935	1.48058	0.0884575	Target: CN217935; Description: CN217935 RJA021C10.ab1 RJbrain Gallus gallus cDNA 5', mRNA sequence; Next best Hit: CN219445(alignment length 60bp with 100.00%identity)
	CN224387	2.36839	0.0115241	Target: CN224387; Description: CN224387 RJA101A02.ab1 RJbrain Gallus gallus cDNA 5', mRNA sequence; Next best Hit: CN224748(alignment length 60bp with 100.00%identity)		CN217585	1.91121	0.0884843	Target: CN217585; Description: CN217585 RJA015A12.ab1 RJbrain Gallus gallus cDNA 5', mRNA sequence; Next best Hit: CN224491(alignment length 60bp with 95.00%identity)
ens|ENSGALT00000038813	MC1R	4.39241	0.0115343	melanocortin 1 receptor [Source:RefSeq peptide;Acc:NP_001026633] [ENSGALT00000038813]	ens|ENSGALT00000006927|gb|BX932524|gb|BX936193|gb|XM_422273	LOC424430	1.98462	0.088786	Uncharacterized protein [Source:UniProtKB/TrEMBL;Acc:F1NVJ2] [ENSGALT00000006927]
	CN220836	1.7254	0.0115405	Target: CN220836; Description: CN220836 WLA022G01.ab1 WLbrain Gallus gallus cDNA 5', mRNA sequence; Next best Hit: CN224681(alignment length 50bp with 96.00%identity)		CN216926	1.62211	0.0891113	Target: CN216926; Description: CN216926 RJA002F02.ab1 RJbrain Gallus gallus cDNA 5', mRNA sequence; Next best Hit: A_87_P133868(alignment length 18bp with 100.00%identity)
	CO762085	3.57391	0.0115432	Target: CO762085; Description: CO762085 brain_EST05277 Brain cDNA Library Gallus gallus cDNA 5', mRNA sequence; Next best Hit: A_87_P015494(alignment length 15bp with 100.00%identity)	gb|BX929500|gb|XM_001233932|tc|TC424062	BX929500	1.68179	0.0894296	Gallus gallus finished cDNA, clone ChEST985f16. [BX929500]
ens|ENSGALT00000005286|gb|BX950536|gb|BX933230|gb|DR412486	ENSGALT00000005286	1.78334	0.0115439	Uncharacterized protein [Source:UniProtKB/TrEMBL;Acc:E1C6T6] [ENSGALT00000005286]	tc|TC398037|ref|XM_424400	TC398037	2.12777	0.0895992	Rep: 1-acyl-sn-glycerol-3-phosphate acyltransferase zeta precursor (EC 2.3.1.51) (1-AGP acyltransferase 6) (1-AGPAT 6) (Lysophosphatidic acid acyltransferase zeta) (LPAAT-zeta). - Canis familiaris, complete [TC398037]
	CN222756	2.32481	0.0115925	Target: CN222756; Description: CN222756 WLA043A04.ab1 WLbrain Gallus gallus cDNA 5', mRNA sequence; Next best Hit: CN219722(alignment length 16bp with 100.00%identity)		CN236019	2.31784	0.0896087	Target: CN236019; Description: CN236019 WLA109F11.ab1 WLbrain Gallus gallus cDNA 5', mRNA sequence; Next best Hit: BG641569(alignment length 56bp with 100.00%identity)
ens|ENSGALT00000035751|gb|BX929420|gb|BX930044|gb|BX932686	MRPS12	1.46223	0.0115967	mitochondrial ribosomal protein S12 [Source:HGNC Symbol;Acc:10380] [ENSGALT00000035751]	tc|TC377267|ref|XM_421757	TC377267	1.5927	0.0897013	Rep: Glycerol-3-phosphate acyltransferase, mitochondrial precursor (EC 2.3.1.15) (GPAT). - Canis familiaris, partial (94%) [TC377267]
ens|ENSGALT00000018715|gb|XM_422071|tc|TC383894	2013-03-04	2.42038	0.0116086	membrane-associated ring finger (C3HC4) 4 [Source:HGNC Symbol;Acc:29269] [ENSGALT00000018715]		CN217112	1.54809	0.0897095	Target: CN217112; Description: CN217112 RJA005E04.ab1 RJbrain Gallus gallus cDNA 5', mRNA sequence; Next best Hit: CN222404(alignment length 61bp with 98.36%identity)
ens|ENSGALT00000004968|tc|TC388856	ZC3H7A	1.55707	0.0116124	zinc finger CCCH-type containing 7A [Source:HGNC Symbol;Acc:30959] [ENSGALT00000004968]		CN220767	1.16608	0.0897515	Target: CN220767; Description: CN220767 RJA069D11.ab1 RJbrain Gallus gallus cDNA 5', mRNA sequence; Next best Hit: CN224072(alignment length 60bp with 100.00%identity)
ens|ENSGALT00000016529|tc|TC441703	SMARCA4	2.40495	0.0116239	Rep: PREDICTED: BRG1 protein, partial - Gallus gallus, complete [TC441703]		CO760041	1.39235	0.0898178	Target: CO760041; Description: CO760041 brain_EST03233 Brain cDNA Library Gallus gallus cDNA 5', mRNA sequence; Next best Hit: CO761068(alignment length 60bp with 100.00%identity)
ref|NM_205088|ens|ENSGALT00000021364|gb|Y11833	IKZF1	1.54461	0.0116282	Gallus gallus IKAROS family zinc finger 1 (Ikaros) (IKZF1), mRNA [NM_205088]	ens|ENSGALT00000005402|ens|ENSGALT00000036376|gb|XR_026880|tc|TC442462	ENSGALT00000005402	1.48312	0.0898775	family with sequence similarity 160, member A2 [Source:HGNC Symbol;Acc:25378] [ENSGALT00000005402]
gb|CR388882|gb|XM_417901|tc|TC382048	CADM1	2.11984	0.0116522	Gallus gallus finished cDNA, clone ChEST78a21. [CR388882]	ens|ENSGALT00000012830	DLAT	2.30947	0.0899876	Uncharacterized protein [Source:UniProtKB/TrEMBL;Acc:E1C6N5] [ENSGALT00000012830]
ens|ENSGALT00000006764|gb|CR405895	ENSGALT00000006764	3.73075	0.0116543	Uncharacterized protein [Source:UniProtKB/TrEMBL;Acc:E1BRB9] [ENSGALT00000006764]	ref|NM_001006502|ens|ENSGALT00000033463|ens|ENSGALT00000009150|gb|AJ720322	NDUFB8	1.56548	0.090049	Gallus gallus NADH dehydrogenase (ubiquinone) 1 beta subcomplex, 8, 19kDa (NDUFB8), nuclear gene encoding mitochondrial protein, mRNA [NM_001006502]
tc|TC436331	TC436331	3.61519	0.0116717	Rep: MGC155163 protein - Bos taurus (Bovine), partial (29%) [TC436331]	ens|ENSGALT00000023441	USP5	1.36786	0.0901501	Ubiquitin carboxyl-terminal hydrolase [Source:UniProtKB/TrEMBL;Acc:E1C8W4] [ENSGALT00000023441]
ens|ENSGALT00000023402|gb|HQ386789|gb|HQ386791|gb|HQ386792	PROM1	1.91064	0.0116869	prominin 1 [Source:HGNC Symbol;Acc:9454] [ENSGALT00000023402]	gb|BX930066|gb|BX935408|gb|BX929505|tc|TC397151	BX930066	1.82851	0.090425	Gallus gallus finished cDNA, clone ChEST980m20. [BX930066]
	GT_EA606_A_87_P163033	1.33019	0.0117019	Unknown		CO763823	1.39611	0.0905168	Target: CO763823; Description: CO763823 brain_EST07015 Brain cDNA Library Gallus gallus cDNA 5', mRNA sequence; Next best Hit: CN217076(alignment length 14bp with 100.00%identity)
gb|BX931251	CCDC40	1.50259	0.0117059	Gallus gallus finished cDNA, clone ChEST261c23. [BX931251]		CN222632	3.62317	0.0905906	Target: CN222632; Description: CN222632 RJA087H02.ab1 RJbrain Gallus gallus cDNA 5', mRNA sequence; Next best Hit: CN218591(alignment length 60bp with 98.33%identity)
	CO759024	1.69231	0.0117261	Target: CO759024; Description: CO759024 brain_EST02216 Brain cDNA Library Gallus gallus cDNA 5', mRNA sequence; Next best Hit: CO759028(alignment length 60bp with 100.00%identity)	gb|XM_424802|tc|TC380459|tc|TC379268	PGM5	1.13544	0.0905958	PREDICTED: Gallus gallus similar to phosphoglucomutase 5 (LOC427215), partial mRNA [XM_424802]
ens|ENSGALT00000009960|gb|BX931070|tc|TC441889	LIMA1	1.94325	0.0117282	LIM domain and actin binding 1 [Source:HGNC Symbol;Acc:24636] [ENSGALT00000009960]		CN219997	2.32043	0.0907027	Target: CN219997; Description: CN219997 RJA060C05.ab1 RJbrain Gallus gallus cDNA 5', mRNA sequence; Next best Hit: CN217052(alignment length 15bp with 100.00%identity)
ref|NM_001012532|gb|AJ719749|gb|AJ851589|gb|AJ851679	EHMT1	1.29525	0.0117311	Gallus gallus euchromatic histone-lysine N-methyltransferase 1 (EHMT1), mRNA [NM_001012532]	ref|NM_001167752|ens|ENSGALT00000020484|gb|BU309578|tc|TC387575	MB	4.4189	0.091036	Gallus gallus myoglobin (MB), mRNA [NM_001167752]
gb|CR352972	CR352972	1.40008	0.0117331	Gallus gallus finished cDNA, clone ChEST539e24. [CR352972]		CN226001	2.31903	0.0912949	Target: CN226001; Description: CN226001 WLA082F01.ab1 WLbrain Gallus gallus cDNA 5', mRNA sequence; Next best Hit: BG642025(alignment length 60bp with 100.00%identity)
gb|CR390049|tc|TC424229|ref|XM_417941	CR390049	1.36739	0.0117428	Gallus gallus finished cDNA, clone ChEST996o20. [CR390049]	ref|NM_001006134|ens|ENSGALT00000006026|ens|ENSGALT00000006024|gb|AJ720146	USP4	1.63956	0.0915352	Gallus gallus ubiquitin specific peptidase 4 (proto-oncogene) (USP4), mRNA [NM_001006134]
	CN725544	1.26816	0.0117472	Target: CN725544; Description: CN725544 ROS_liv52 Chicken 7 weeks liver cDNA library Gallus gallus cDNA, mRNA sequence; Next best Hit: CN223845(alignment length 23bp with 91.30%identity)		CN218289	2.2144	0.091665	Target: CN218289; Description: CN218289 RJA027H09.ab1 RJbrain Gallus gallus cDNA 5', mRNA sequence; Next best Hit: CN224266(alignment length 60bp with 100.00%identity)
gb|BU364817|tc|TC391218|ref|XM_001234471	BU364817	1.95326	0.0117545	603786593F1 CSEQCHN72 Gallus gallus cDNA clone ChEST743i24 5', mRNA sequence [BU364817]	ref|NM_204974|ens|ENSGALT00000036985|ens|ENSGALT00000023895|ens|ENSGALT00000023896	ATP6V1A	1.50935	0.0918575	Gallus gallus ATPase, H+ transporting, lysosomal 70kDa, V1 subunit A (ATP6V1A), mRNA [NM_204974]
ref|NM_204922|ens|ENSGALT00000039201|ens|ENSGALT00000010620|ens|ENSGALT00000039195	TNNT3	2.21286	0.0117546	Gallus gallus troponin T type 3 (skeletal, fast) (TNNT3), mRNA [NM_204922]		CO761495	1.40421	0.0919394	Target: CO761495; Description: CO761495 brain_EST04687 Brain cDNA Library Gallus gallus cDNA 5', mRNA sequence; Next best Hit: CO761679(alignment length 60bp with 100.00%identity)
	CO759031	1.92211	0.011762	Target: CO759031; Description: CO759031 brain_EST02223 Brain cDNA Library Gallus gallus cDNA 5', mRNA sequence; Next best Hit: CO759175(alignment length 60bp with 100.00%identity)	gb|L25374|gb|L25373|gb|S78288|tc|TC408238	ALDOA	2.2859	0.092036	Chicken (clone 322A-3) aldolase A mRNA, 3'end, C-term cds, 3'UTR complete. [L25374]
	CO762460	1.31627	0.0117624	Target: CO762460; Description: CO762460 brain_EST05652 Brain cDNA Library Gallus gallus cDNA 5', mRNA sequence; Next best Hit: CN233615(alignment length 20bp with 95.00%identity)	ref|NM_001199170|ens|ENSGALT00000036704|tc|TC384291|tc|TC397058	NDUFV3	1.83734	0.0921679	Gallus gallus NADH dehydrogenase (ubiquinone) flavoprotein 3, 10kDa (NDUFV3), nuclear gene encoding mitochondrial protein, transcript variant 1, mRNA [NM_001199170]
	CN224617	1.33934	0.0117723	Target: CN224617; Description: CN224617 WLA058E06.ab1 WLbrain Gallus gallus cDNA 5', mRNA sequence; Next best Hit: A_87_P009192(alignment length 41bp with 97.56%identity)		CN222174	1.47305	0.0922723	Target: CN222174; Description: CN222174 WLA039C09.ab1 WLbrain Gallus gallus cDNA 5', mRNA sequence; Next best Hit: A_87_P013872(alignment length 14bp with 100.00%identity)
gb|CR733214	CR733214	2.78559	0.0117976	Gallus gallus finished cDNA, clone ChEST978l24. [CR733214]	ens|ENSGALT00000013057|ref|XM_421913	ENSGALT00000013057	1.29515	0.0923127	Uncharacterized protein [Source:UniProtKB/TrEMBL;Acc:F1N9A4] [ENSGALT00000013057]
	CN219825	1.46809	0.0118073	Target: CN219825; Description: CN219825 RJA057E12.ab1 RJbrain Gallus gallus cDNA 5', mRNA sequence; Next best Hit: CN221893(alignment length 60bp with 100.00%identity)		CN220956	1.89635	0.0924835	Target: CN220956; Description: CN220956 WLA028A05.ab1 WLbrain Gallus gallus cDNA 5', mRNA sequence; Next best Hit: A_87_P115153(alignment length 14bp with 100.00%identity)
ens|ENSGALT00000037891	ENSGALT00000037891	3.72784	0.0118288	Uncharacterized protein [Source:UniProtKB/TrEMBL;Acc:F1NE23] [ENSGALT00000037891]	gb|CR386473	CR386473	1.4246	0.0928303	Gallus gallus finished cDNA, clone ChEST1024m11. [CR386473]
ref|NM_204971|gb|U37691|gb|BU436062|tc|TC413122	CTSK	1.46937	0.0118325	Gallus gallus cathepsin K (CTSK), mRNA [NM_204971]		AW198263	1.68008	0.092884	Target: AW198263; Description: AW198263 pnl-b.pk0001.f8 chicken liver cDNA library Gallus gallus cDNA clone pnl-b.pk0001.f8 ; Next best Hit: A_87_P228448(alignment length 26bp with 100.00%identity)
ref|NM_001024575|ens|ENSGALT00000009614|gb|AY994153|tc|TC373992	RBP3	1.48686	0.0118464	Gallus gallus retinol binding protein 3, interstitial (RBP3), mRNA [NM_001024575]		CN217679	1.81337	0.0932199	Target: CN217679; Description: CN217679 RJA016C10.ab1 RJbrain Gallus gallus cDNA 5', mRNA sequence; Next best Hit: A_87_P150813(alignment length 25bp with 96.00%identity)
gb|CR353695	COMP	1.55932	0.0118507	Gallus gallus finished cDNA, clone ChEST930o17. [CR353695]	ref|NM_001030727|ens|ENSGALT00000039385|ens|ENSGALT00000012884|gb|AJ719552	DLD	1.57193	0.0932868	Gallus gallus dihydrolipoamide dehydrogenase (DLD), mRNA [NM_001030727]
gb|CR354036|gb|DR411650|tc|TC416977|tc|TC402003	CR354036	1.32966	0.0118523	Gallus gallus finished cDNA, clone ChEST458i18. [CR354036]	ref|NM_001031247|ens|ENSGALT00000033730|gb|CR389511|gb|AJ720729	NDUFA10	1.49422	0.0935819	Gallus gallus NADH dehydrogenase (ubiquinone) 1 alpha subcomplex, 10, 42kDa (NDUFA10), nuclear gene encoding mitochondrial protein, mRNA [NM_001031247]
ens|ENSGALT00000036739	ENSGALT00000036739	2.6433	0.0118726	Uncharacterized protein [Source:UniProtKB/TrEMBL;Acc:E1C5R0] [ENSGALT00000036739]	ref|NM_001030830|ens|ENSGALT00000027680|gb|CR524029|gb|AJ720266	CRYL1	1.15197	0.0936008	Gallus gallus crystallin, lambda 1 (CRYL1), mRNA [NM_001030830]
ens|ENSGALT00000019550|ens|ENSGALT00000037741|ens|ENSGALT00000037736|gb|CR352861	ENSGALT00000019550	1.76618	0.0118896	phosphodiesterase 5A, cGMP-specific [Source:HGNC Symbol;Acc:8784] [ENSGALT00000019550]		CN219099	1.29152	0.0937258	Target: CN219099; Description: CN219099 RJA049A05.ab1 RJbrain Gallus gallus cDNA 5', mRNA sequence; Next best Hit: CN219212(alignment length 57bp with 96.49%identity)
gb|CR405942	CR405942	1.57625	0.0119148	Gallus gallus finished cDNA, clone ChEST701g15. [CR405942]	gb|CR523548	CR523548	1.46437	0.0937857	Gallus gallus finished cDNA, clone ChEST867d17. [CR523548]
ref|NM_001031492|gb|AJ720618|tc|TC377035|tc|TC408162	PMEPA1	2.6505	0.0119283	Gallus gallus prostate transmembrane protein, androgen induced 1 (PMEPA1), mRNA [NM_001031492]	ref|NM_001031180|ens|ENSGALT00000009233|gb|AJ719905|gb|AJ851388	SWAP70	2.93054	0.0940138	Gallus gallus SWAP switching B-cell complex 70kDa subunit (SWAP70), mRNA [NM_001031180]
ens|ENSGALT00000027439|gb|CR524304|gb|BU410893|tc|TC444320	ZC3H13	1.50518	0.0119313	zinc finger CCCH-type containing 13 [Source:HGNC Symbol;Acc:20368] [ENSGALT00000027439]	ref|NM_204211|ens|ENSGALT00000019062|gb|AF299388|gb|AF329270	SOD2	1.59915	0.0941075	Gallus gallus superoxide dismutase 2, mitochondrial (SOD2), nuclear gene encoding mitochondrial protein, mRNA [NM_204211]
tc|TC382985|ref|XM_416872	TC382985	1.96817	0.0119468	Rep: Sodium/hydrogen exchanger 7 (Na(+)/H(+) exchanger 7) (NHE-7) (Solute carrier family 9 member 7). - Gallus gallus, complete [TC382985]		GT_EA606_A_87_P191198	1.92874	0.0943058	Unknown
ref|NM_001044674|gb|AB161354|tc|TC375964|tc|TC430410	IL11RA	1.0274	0.0119487	Gallus gallus interleukin 11 receptor, alpha (IL11RA), mRNA [NM_001044674]	ref|NM_213580|ens|ENSGALT00000002624|ens|ENSGALT00000036295|gb|BX930280	MUSTN1	1.95406	0.0943239	Gallus gallus musculoskeletal, embryonic nuclear protein 1 (MUSTN1), mRNA [NM_213580]
	CO759344	2.20294	0.0119618	Target: CO759344; Description: CO759344 brain_EST02536 Brain cDNA Library Gallus gallus cDNA 5', mRNA sequence; Next best Hit: CO759035(alignment length 56bp with 100.00%identity)		CN224156	1.76482	0.0944056	Target: CN224156; Description: CN224156 RJA099D09.ab1 RJbrain Gallus gallus cDNA 5', mRNA sequence; Next best Hit: CN221058(alignment length 58bp with 93.10%identity)
ens|ENSGALT00000002318|gb|CR352542|gb|BX929688|gb|XM_417997	CTTNBP2NL	3.45712	0.0119789	CTTNBP2 N-terminal like [Source:HGNC Symbol;Acc:25330] [ENSGALT00000002318]	ens|ENSGALT00000020413|ens|ENSGALT00000020411|gb|AB032421|tc|TC433576	ENSGALT00000020413	1.56086	0.0946108	Uncharacterized protein [Source:UniProtKB/TrEMBL;Acc:F1NDK9] [ENSGALT00000020413]
	CO762035	1.31685	0.0119798	Target: CO762035; Description: CO762035 brain_EST05227 Brain cDNA Library Gallus gallus cDNA 5', mRNA sequence; Next best Hit: CO761633(alignment length 15bp with 100.00%identity)	ens|ENSGALT00000036731|ens|ENSGALT00000036729|ens|ENSGALT00000036730|gb|BX930610	ENSGALT00000036731	1.32683	0.0946751	aspartate beta-hydroxylase [Source:HGNC Symbol;Acc:757] [ENSGALT00000036731]
gb|BU291956|tc|TC424919	BU291956	2.11053	0.0120003	603577334F1 CSEQCHN55 Gallus gallus cDNA clone ChEST528c9 5', mRNA sequence [BU291956]	ens|ENSGALT00000001286|gb|DQ777766|tc|TC433059|ref|XM_003640602	ENSGALT00000001286	1.61873	0.0947579	Uncharacterized protein [Source:UniProtKB/TrEMBL;Acc:F1ND02] [ENSGALT00000001286]
ens|ENSGALT00000022607|gb|BX930735|gb|BX930789|gb|BX935410	ENSGALT00000022607	1.83163	0.0120165	Abelson helper integration site 1 [Source:HGNC Symbol;Acc:21575] [ENSGALT00000022607]	ref|NM_001252104|ens|ENSGALT00000006036|gb|CR733233|tc|TC403524	ALDH4A1	1.49804	0.0948928	Gallus gallus aldehyde dehydrogenase 4 family, member A1 (ALDH4A1), nuclear gene encoding mitochondrial protein, mRNA [NM_001252104]
ens|ENSGALT00000007766|ref|XM_003641922	ENSGALT00000007766	1.77568	0.0120502	Uncharacterized protein [Source:UniProtKB/TrEMBL;Acc:E1BXH0] [ENSGALT00000007766]	ref|NM_204286|ens|ENSGALT00000039579|ens|ENSGALT00000002698|ens|ENSGALT00000039585	ATP5A1	2.02291	0.0951193	Gallus gallus ATP synthase, H+ transporting, mitochondrial F1 complex, alpha subunit 1, cardiac muscle (ATP5A1), nuclear gene encoding mitochondrial protein, mRNA [NM_204286]
ens|ENSGALT00000017263|tc|TC403567|tc|TC437056	SNX25	2.08541	0.0120594	sorting nexin 25 [Source:HGNC Symbol;Acc:21883] [ENSGALT00000017263]	ens|ENSGALT00000000635|gb|XM_427615|tc|NP9670725	P56LCK	1.57927	0.0951337	Uncharacterized protein [Source:UniProtKB/TrEMBL;Acc:F1NP54] [ENSGALT00000000635]
tc|NP12999596	NP12999596	2.53228	0.0120972	GB		CN219322	2.61939	0.0953388	Target: CN219322; Description: CN219322 WLA004B03.ab1 WLbrain Gallus gallus cDNA 5', mRNA sequence; Next best Hit: CN219312(alignment length 60bp with 95.00%identity)
ref|NM_205474|ens|ENSGALT00000010532|ens|ENSGALT00000001794|ens|ENSGALT00000001795	MYH10	2.39309	0.012117	Gallus gallus myosin, heavy chain 10, non-muscle (MYH10), mRNA [NM_205474]		AW198451	1.56707	0.0954213	Target: AW198451; Description: AW198451 pnl-b.pk0008.e3 chicken liver cDNA library Gallus gallus cDNA clone pnl-b.pk0008.e3 5', mRNA sequence; Next best Hit: A_87_P035329(alignment length 48bp with 100.00%identity)
gb|XM_425197|tc|TC390775	SH3PXD2B	3.05001	0.0121333	PREDICTED: Gallus gallus SH3 and PX domains 2B (SH3PXD2B), mRNA [XM_425197]	ref|NM_001031377|ens|ENSGALT00000041146|ens|ENSGALT00000022771|gb|AJ720569	FAM76A	1.33572	0.0954479	Gallus gallus family with sequence similarity 76, member A (FAM76A), mRNA [NM_001031377]
ref|NM_001030663|ens|ENSGALT00000007260|gb|AJ851380|tc|TC373504	HVCN1	2.1356	0.01214	Gallus gallus hydrogen voltage-gated channel 1 (HVCN1), mRNA [NM_001030663]		CN224308	1.45369	0.0954874	Target: CN224308; Description: CN224308 RJA100C01.ab1 RJbrain Gallus gallus cDNA 5', mRNA sequence; Next best Hit: AW198501(alignment length 14bp with 100.00%identity)
gb|XR_026933|tc|TC439554|ref|XM_003642162	XR_026933	2.35051	0.0121486	PREDICTED: Gallus gallus similar to mKIAA1924 protein (LOC416407), mRNA [XR_026933]	ref|NM_001005808|ens|ENSGALT00000039672|gb|CR406443|gb|AJ720955	IDH3A	1.54267	0.0955079	Gallus gallus isocitrate dehydrogenase 3 (NAD+) alpha (IDH3A), nuclear gene encoding mitochondrial protein, mRNA [NM_001005808]
	CN217481	1.66846	0.0121684	Target: CN217481; Description: CN217481 RJA012H10.ab1 RJbrain Gallus gallus cDNA 5', mRNA sequence; Next best Hit: CN218395(alignment length 60bp with 100.00%identity)	ens|ENSGALT00000006721|gb|CR353872|gb|BU433255|tc|TC437647	ENSGALT00000006721	1.82357	0.0956017	Uncharacterized protein [Source:UniProtKB/TrEMBL;Acc:E1BRU2] [ENSGALT00000006721]
gb|CR386891	CR386891	1.74469	0.0121793	Gallus gallus finished cDNA, clone ChEST35o9. [CR386891]	ens|ENSGALT00000015262|gb|CR733314|gb|XM_426543|tc|TC420847	PRDX3	1.6233	0.0957981	peroxiredoxin 3 [Source:HGNC Symbol;Acc:9354] [ENSGALT00000015262]
gb|CR390813|gb|CR389415|tc|TC380234	ABI3BP	1.85831	0.0121923	Gallus gallus finished cDNA, clone ChEST457i24. [CR390813]	gb|CR385295|gb|BU298507|tc|TC423109	CR385295	1.52532	0.0958785	Gallus gallus finished cDNA, clone ChEST794p15. [CR385295]
tc|NP9676602	NP9676602	2.90821	0.0121956	GB		AW198325	2.52866	0.0959243	Target: AW198325; Description: AW198325 pnl-b.pk0005.d9 chicken liver cDNA library Gallus gallus cDNA clone pnl-b.pk0005.d9 5', mRNA sequence; Next best Hit: CN218940(alignment length 56bp with 100.00%identity)
tc|NP9674186	NP9674186	2.163	0.0122014	GB		CN220436	1.45871	0.0962203	Target: CN220436; Description: CN220436 RJA065H01.ab1 RJbrain Gallus gallus cDNA 5', mRNA sequence; Next best Hit: CN223149(alignment length 60bp with 100.00%identity)
ens|ENSGALT00000006663|gb|CR353761|gb|XM_413786|tc|TC378413	SLTM	2.16589	0.012207	SAFB-like, transcription modulator [Source:HGNC Symbol;Acc:20709] [ENSGALT00000006663]	ens|ENSGALT00000040227|ens|ENSGALT00000009885|ens|ENSGALT00000009886|gb|BX933757	MYOT	1.97004	0.0963763	myotilin [Source:HGNC Symbol;Acc:12399] [ENSGALT00000040227]
	CN217710	1.23469	0.0122118	Target: CN217710; Description: CN217710 RJA016H03.ab1 RJbrain Gallus gallus cDNA 5', mRNA sequence; Next best Hit: A_87_P110213(alignment length 14bp with 100.00%identity)	ens|ENSGALT00000017510|gb|BX935656|gb|BX929885|gb|CR353746	ENSGALT00000017510	1.75502	0.0965125	Ataxin-3 [Source:UniProtKB/Swiss-Prot;Acc:Q9W689] [ENSGALT00000017510]
ens|ENSGALT00000021603|gb|XM_427969|tc|TC387598	ENSGALT00000021603	2.66251	0.012217	vesicle amine transport protein 1 homolog (T. californica)-like [Source:HGNC Symbol;Acc:29315] [ENSGALT00000021603]	ref|NM_205321|ens|ENSGALT00000012100|gb|CR338995|gb|X15636	GOT1	1.9635	0.0966837	Gallus gallus glutamic-oxaloacetic transaminase 1, soluble (aspartate aminotransferase 1) (GOT1), mRNA [NM_205321]
	CN225266	2.59095	0.0122189	Target: CN225266; Description: CN225266 WLA069F09.ab1 WLbrain Gallus gallus cDNA 5', mRNA sequence; Next best Hit: CN233606(alignment length 60bp with 100.00%identity)		CN218170	1.74778	0.0967799	Target: CN218170; Description: CN218170 RJA025H07.ab1 RJbrain Gallus gallus cDNA 5', mRNA sequence; Next best Hit: AW198263(alignment length 28bp with 100.00%identity)
ens|ENSGALT00000015909|gb|CR387436	NAA15	1.70598	0.0122368	N(alpha)-acetyltransferase 15, NatA auxiliary subunit [Source:HGNC Symbol;Acc:30782] [ENSGALT00000015909]	ens|ENSGALT00000020337|gb|BX930010|tc|TC431256|tc|TC441381	ENSGALT00000020337	1.27912	0.0968113	SET binding factor 1 [Source:HGNC Symbol;Acc:10542] [ENSGALT00000020337]
ens|ENSGALT00000004468|gb|CO773496|tc|TC420406	NUDT3	1.17603	0.0122369	Uncharacterized protein [Source:UniProtKB/TrEMBL;Acc:E1C4K9] [ENSGALT00000004468]	ens|ENSGALT00000011489|gb|BX933197|gb|CR405815|gb|XM_414651	UQCRQ	1.74088	0.0969499	Uncharacterized protein [Source:UniProtKB/TrEMBL;Acc:F1N828] [ENSGALT00000011489]
ens|ENSGALT00000012429|gb|XM_001234735|tc|TC392784|ref|XM_003640637	GPR158	1.90203	0.0122473	G protein-coupled receptor 158 [Source:HGNC Symbol;Acc:23689] [ENSGALT00000012429]	tc|TC382384	TC382384	4.48949	0.0969664	Rep: NudC domain-containing protein 2 - Rattus norvegicus (Rat), complete [TC382384]
	CN217629	1.57242	0.0122533	Target: CN217629; Description: CN217629 RJA015F01.ab1 RJbrain Gallus gallus cDNA 5', mRNA sequence; Next best Hit: CN218020(alignment length 60bp with 100.00%identity)	gb|AJ720310|gb|XR_026659|tc|TC376062|tc|TC436535	RBM38	1.18125	0.0970957	Gallus gallus mRNA for hypothetical protein, clone 14l15. [AJ720310]
gb|XM_414405|tc|TC378962	KCTD6	1.25572	0.0122581	PREDICTED: Gallus gallus hypothetical LOC416067 (LOC416067), mRNA [XM_414405]	gb|CR353918|gb|Y13978|tc|TC439470	PODXL	1.27437	0.0971445	Gallus gallus finished cDNA, clone ChEST360a10. [CR353918]
ens|ENSGALT00000022607|gb|CR390148|gb|XR_027056|tc|TC404010	ENSGALT00000022607	2.17277	0.0122614	Abelson helper integration site 1 [Source:HGNC Symbol;Acc:21575] [ENSGALT00000022607]		CN221423	1.57475	0.0971584	Target: CN221423; Description: CN221423 WLA031G11.ab1 WLbrain Gallus gallus cDNA 5', mRNA sequence; Next best Hit: CN236360(alignment length 60bp with 100.00%identity)
ens|ENSGALT00000005977|gb|XM_414094	ENSGALT00000005977	1.81084	0.0122683	naked cuticle homolog 1 (Drosophila) [Source:HGNC Symbol;Acc:17045] [ENSGALT00000005977]		BG641569	2.1755	0.097415	Target: BG641569; Description: BG641569 pgl1c.pk001.f5 Chicken liver cDNA library Gallus gallus cDNA clone pgl1c.pk001.f5 ; Next best Hit: BI067780(alignment length 16bp with 100.00%identity)
	CO761618	1.6841	0.0122893	Target: CO761618; Description: CO761618 brain_EST04810 Brain cDNA Library Gallus gallus cDNA 5', mRNA sequence; Next best Hit: CO759773(alignment length 60bp with 96.67%identity)	ens|ENSGALT00000039385|tc|TC426459|tc|TC380330|tc|TC404482	DLD	1.70236	0.0974234	dihydrolipoamide dehydrogenase [Source:RefSeq peptide;Acc:NP_001025898] [ENSGALT00000039385]
gb|BX935127	BX935127	2.22451	0.0123016	Gallus gallus finished cDNA, clone ChEST869e3. [BX935127]		CN221293	1.73229	0.0975223	Target: CN221293; Description: CN221293 WLA030H01.ab1 WLbrain Gallus gallus cDNA 5', mRNA sequence; Next best Hit: CN222547(alignment length 15bp with 100.00%identity)
ens|ENSGALT00000025239|gb|BX935341|gb|BX935374|gb|BX933983	JPH1	1.87714	0.0123051	junctophilin 1 [Source:HGNC Symbol;Acc:14201] [ENSGALT00000025239]	ens|ENSGALT00000017249|gb|XM_419522|tc|TC397817	SULT6B1	2.4079	0.0976686	sulfotransferase family, cytosolic, 6B, member 1 [Source:HGNC Symbol;Acc:33433] [ENSGALT00000017249]
gb|CR523062|gb|XM_415087|tc|TC377804	LOC416793	1.46049	0.012311	Gallus gallus finished cDNA, clone ChEST566c19. [CR523062]	ens|ENSGALT00000007577|gb|BX935887|gb|BX935827|gb|BU411878	ENSGALT00000007577	1.81496	0.0977332	obscurin, cytoskeletal calmodulin and titin-interacting RhoGEF [Source:HGNC Symbol;Acc:15719] [ENSGALT00000007577]
gb|CR386890|tc|TC395192	CR386890	2.43323	0.0123115	Gallus gallus finished cDNA, clone ChEST37n12. [CR386890]	ens|ENSGALT00000005411|tc|TC436185|ref|XM_003641657	LMX1A	2.074	0.0977586	Uncharacterized protein [Source:UniProtKB/TrEMBL;Acc:E1C2D6] [ENSGALT00000005411]
ens|ENSGALT00000009868	ENSGALT00000009868	2.75976	0.0123125	Uncharacterized protein [Source:UniProtKB/TrEMBL;Acc:E1C1H0] [ENSGALT00000009868]	ref|NM_205519|gb|M26064|tc|TC403508|tc|TC416525	ATP2A1	3.10095	0.0979208	Gallus gallus ATPase, Ca++ transporting, cardiac muscle, fast twitch 1 (ATP2A1), mRNA [NM_205519]
ens|ENSGALT00000012278|gb|CR390426|gb|CR391129|tc|TC381581	JAKMIP2	2.44847	0.0123156	janus kinase and microtubule interacting protein 2 [Source:HGNC Symbol;Acc:29067] [ENSGALT00000012278]	ens|ENSGALT00000022505|gb|DR427191|tc|TC443618	PCYOX1	1.65607	0.0979922	prenylcysteine oxidase 1 [Source:HGNC Symbol;Acc:20588] [ENSGALT00000022505]
ref|NM_001030726|ens|ENSGALT00000009169|gb|AJ851702|gb|BU330676	TNFAIP1	2.27246	0.0123239	Gallus gallus tumor necrosis factor, alpha-induced protein 1 (endothelial) (TNFAIP1), mRNA [NM_001030726]		CN221643	1.47447	0.0980909	Target: CN221643; Description: CN221643 WLA033D01.ab1 WLbrain Gallus gallus cDNA 5', mRNA sequence; Next best Hit: CN224952(alignment length 60bp with 100.00%identity)
	CN233216	1.74131	0.0123375	Target: CN233216; Description: CN233216 RJA103H08.ab1 RJbrain Gallus gallus cDNA 5', mRNA sequence; Next best Hit: CN222091(alignment length 16bp with 100.00%identity)		CN224436	1.73554	0.098161	Target: CN224436; Description: CN224436 RJA101C10.ab1 RJbrain Gallus gallus cDNA 5', mRNA sequence; Next best Hit: CN218828(alignment length 60bp with 98.33%identity)
ens|ENSGALT00000020475|gb|BX931109|gb|BU456570|gb|XM_422165	GALNT13	2.68597	0.012351	UDP-N-acetyl-alpha-D-galactosamine:polypeptide N-acetylgalactosaminyltransferase 13 (GalNAc-T13) [Source:HGNC Symbol;Acc:23242] [ENSGALT00000020475]		CO763871	1.48677	0.0981688	Target: CO763871; Description: CO763871 brain_EST07063 Brain cDNA Library Gallus gallus cDNA 5', mRNA sequence; Next best Hit: CN218454(alignment length 15bp with 100.00%identity)
ens|ENSGALT00000034043	ENSGALT00000034043	2.08685	0.0123578	Uncharacterized protein [Source:UniProtKB/TrEMBL;Acc:F1NQ73] [ENSGALT00000034043]	ref|NM_001006562|ens|ENSGALT00000039419|ens|ENSGALT00000021790|ens|ENSGALT00000021792	ABCF2	1.67566	0.0981725	Gallus gallus ATP-binding cassette, sub-family F (GCN20), member 2 (ABCF2), nuclear gene encoding mitochondrial protein, mRNA [NM_001006562]
	CD214319	1.7019	0.0123603	Target: CD214319; Description: CD214319 pgl1n.pk005.b4 Normalized chicken liver cDNA library (pgl1n) Gallus gallus cDNA clone pgl1n.pk005.b4 ; Next best Hit: A_87_P020522(alignment length 15bp with 100.00%identity)	ref|NM_204425|ens|ENSGALT00000017247|ens|ENSGALT00000037966|gb|AY098584	CRIM1	1.67465	0.0982793	Gallus gallus cysteine rich transmembrane BMP regulator 1 (chordin-like) (CRIM1), mRNA [NM_204425]
	CN224208	1.52257	0.0123738	Target: CN224208; Description: CN224208 WLA054C09.ab1 WLbrain Gallus gallus cDNA 5', mRNA sequence; Next best Hit: CN233980(alignment length 60bp with 96.67%identity)	ref|NM_001001528|ens|ENSGALT00000008265|gb|BX933466|tc|TC376270	AMY1A	1.78533	0.0983461	Gallus gallus amylase, alpha 1A; salivary (AMY1A), mRNA [NM_001001528]
ens|ENSGALT00000018221|gb|BX929923|gb|BX934669|gb|XM_416130	CEP290	1.89803	0.0123794	centrosomal protein 290kDa [Source:HGNC Symbol;Acc:29021] [ENSGALT00000018221]		CN224391	4.61427	0.0987399	Target: CN224391; Description: CN224391 RJA101A04.ab1 RJbrain Gallus gallus cDNA 5', mRNA sequence; Next best Hit: CO760217(alignment length 60bp with 100.00%identity)
ref|NM_204677|ens|ENSGALT00000020542|ens|ENSGALT00000037699|ens|ENSGALT00000037696	BAZ2B	2.08719	0.0123867	Gallus gallus bromodomain adjacent to zinc finger domain, 2B (BAZ2B), mRNA [NM_204677]		CN217651	2.02393	0.0987819	Target: CN217651; Description: CN217651 RJA015H02.ab1 RJbrain Gallus gallus cDNA 5', mRNA sequence; Next best Hit: CN218083(alignment length 60bp with 100.00%identity)
ens|ENSGALT00000014052|ens|ENSGALT00000014050|ens|ENSGALT00000000231|gb|CR387892	RPAP1	1.80658	0.0123974	RNA polymerase II associated protein 1 [Source:HGNC Symbol;Acc:24567] [ENSGALT00000014052]	ens|ENSGALT00000009300|gb|CO635695|tc|TC430578|tc|TC387622	UQCRC1	1.72496	0.0989786	Uncharacterized protein [Source:UniProtKB/TrEMBL;Acc:F1NAC6] [ENSGALT00000009300]
ens|ENSGALT00000020230|ens|ENSGALT00000020233|ref|XR_140048	ENSGALT00000020230	2.44986	0.0123988	Uncharacterized protein [Source:UniProtKB/TrEMBL;Acc:F1NDL5] [ENSGALT00000020230]	gb|XM_001235170	MKNK1	1.55926	0.0990585	PREDICTED: Gallus gallus similar to MNK1 (LOC771961), mRNA [XM_001235170]
gb|AJ851644|gb|CR389913|tc|TC375988|tc|TC438857	TTI1	1.17891	0.0124127	Gallus gallus mRNA for hypothetical protein, clone 14m15. [AJ851644]	ens|ENSGALT00000017169|gb|BX935598|tc|TC379577|tc|TC380594	CDC42EP3	1.5043	0.0990874	CDC42 effector protein (Rho GTPase binding) 3 [Source:HGNC Symbol;Acc:16943] [ENSGALT00000017169]
tc|NP9666824	NP9666824	2.8159	0.0124233	GB	ref|NM_001031583|gb|CR354353|gb|AJ721062|tc|TC376322	NDUFV1	1.9006	0.0992763	Gallus gallus NADH dehydrogenase (ubiquinone) flavoprotein 1, 51kDa (NDUFV1), nuclear gene encoding mitochondrial protein, mRNA [NM_001031583]
ref|NM_204381|ens|ENSGALT00000040832|ens|ENSGALT00000010911|gb|L14924	THY1	1.30686	0.0124385	Gallus gallus Thy-1 cell surface antigen (THY1), mRNA [NM_204381]	gb|CR386089|gb|BU348233	CR386089	1.29683	0.0992979	Gallus gallus finished cDNA, clone ChEST465k10. [CR386089]
[truncated: 8,915 more rows]

## Sheet: 7th and 18th Down
accessions	GeneName	GeomeanFold_T1	p-value	Description	accessions	GeneName	GeomeanFold_T2	p-value	Description
[truncated: 5,254 more rows]

## Sheet: 7th UP
accessions		GeneName	GeomeanFold_T1	p-value	Description
[truncated: 10,126 more rows]

## Sheet: 18th UP
accessions	GeneName	GeomeanFold_T2	p-value	Description
[truncated: 2,104 more rows]

## Sheet: 7th Down
accessions	GeneName	GeomeanFold_T1	p-value	Description
[truncated: 5,254 more rows]

## Sheet: 18th Down
accessions	GeneName	GeomeanFold_T2	p-value	Description
[truncated: 1,539 more rows]
