# Supplementary material for: Transcriptome analysis reveals potential mechanisms and pathways underlying embryonic development with respect to muscle growth and egg production in slow and fast growing chickens
Source: Research Square preprint supplement (doi:10.21203/rs.3.rs-346155/v1), 2021-03-29
Supplement: Supplementary file 5 [file e96fc5812b019f443f71ea47.xlsx]

## Sheet: 7th up pathways
Table S2. List of differentially regulated pathways during embryo development stages (7th day embryo and 18th day thigh muscle) as compared to their respective control samples of control broiler.
Probe Set IDs	Fold change	p-value	Accession number	Gene ID	Gene Name	KEGG_PATHWAY
GT_EA606_A_87_P252708	2.05357	0.0329657	XM_001235299	AGPAT2	1-acylglycerol-3-phosphate O-acyltransferase 2 (lysophosphatidic acid acyltransferase, beta)	gga00561:Glycerolipid metabolism,gga00564:Glycerophospholipid metabolism,gga00565:Ether lipid metabolism,
GT_EA606_A_87_P024410	1.60594	0.0311152	ENSGALT00000026340	AGPAT5	1-acylglycerol-3-phosphate O-acyltransferase 5 (lysophosphatidic acid acyltransferase, epsilon)
GT_EA606_A_87_P247538	1.16815	0.367862	NM_001030768	BPGM	2,3-bisphosphoglycerate mutase	gga00010:Glycolysis / Gluconeogenesis,
GT_EA606_A_87_P012530	1.52048	0.00360661	NM_001006248	DERA	2-deoxyribose-5-phosphate aldolase homolog (C. elegans)	gga00030:Pentose phosphate pathway,
GT_EA606_A_87_P017199	1.41301	0.0385098	NM_001012874	BPNT1	3'(2'), 5'-bisphosphate nucleotidase 1	gga00920:Sulfur metabolism,
GT_EA606_A_87_P217983	2.46309	0.0697708	NM_001012874	BPNT1	3'(2'), 5'-bisphosphate nucleotidase 1	gga00920:Sulfur metabolism,
GT_EA606_A_87_P278543	1.64738	0.0380982	NM_001012874	BPNT1	3'(2'), 5'-bisphosphate nucleotidase 1	gga00920:Sulfur metabolism,
GT_EA606_A_87_P253813	1.16767	0.226767	NM_205411	HMGCS1	3-hydroxy-3-methylglutaryl-Coenzyme A synthase 1 (soluble)	gga00072:Synthesis and degradation of ketone bodies,gga00280:Valine, leucine and isoleucine degradation,gga00650:Butanoate metabolism,gga00900:Terpenoid backbone biosynthesis,
GT_EA606_A_87_P023752	1.99539	0.0334627	ENSGALT00000016138	HAAO	3-hydroxyanthranilate 3,4-dioxygenase	gga00380:Tryptophan metabolism,
GT_EA606_A_87_P192783	1.41734	0.0327609	NM_001006547	BDH1	3-hydroxybutyrate dehydrogenase, type 1	gga00072:Synthesis and degradation of ketone bodies,gga00650:Butanoate metabolism,
GT_EA606_A_87_P036886	1.13984	0.0131473	NM_001006362	HIBADH	3-hydroxyisobutyrate dehydrogenase	gga00280:Valine, leucine and isoleucine degradation,
GT_EA606_A_87_P234473	2.70602	0.0291634	NM_001006362	HIBADH	3-hydroxyisobutyrate dehydrogenase	gga00280:Valine, leucine and isoleucine degradation,
GT_EA606_A_87_P228448	1.72181	0.0339682	NM_001031243	HIBCH	3-hydroxyisobutyryl-Coenzyme A hydrolase	gga00280:Valine, leucine and isoleucine degradation,gga00410:beta-Alanine metabolism,gga00640:Propanoate metabolism,
GT_EA606_A_87_P007422	2.83305	0.0226512	ENSGALT00000018456	OXSM	3-oxoacyl-ACP synthase, mitochondrial	gga00061:Fatty acid biosynthesis,
GT_EA606_A_87_P023806	1.51215	0.0654468	ENSGALT00000018456	OXSM	3-oxoacyl-ACP synthase, mitochondrial	gga00061:Fatty acid biosynthesis,
GT_EA606_A_87_P071871	1.16153	0.00491401	ENSGALT00000011867	ABAT	4-aminobutyrate aminotransferase	gga00250:Alanine, aspartate and glutamate metabolism,gga00280:Valine, leucine and isoleucine degradation,gga00410:beta-Alanine metabolism,gga00640:Propanoate metabolism,gga00650:Butanoate metabolism,
GT_EA606_A_87_P022301	1.64793	0.0557141	ENSGALT00000006930	HPD	4-hydroxyphenylpyruvate dioxygenase	gga00130:Ubiquinone and other terpenoid-quinone biosynthesis,gga00350:Tyrosine metabolism,gga00360:Phenylalanine metabolism,
GT_EA606_A_87_P023571	2.73547	0.00422557	ENSGALT00000010528	MTHFS	5,10-methenyltetrahydrofolate synthetase (5-formyltetrahydrofolate cyclo-ligase)	gga00670:One carbon pool by folate,
GT_EA606_A_87_P024251	1.61337	0.00645887	ENSGALT00000027718	ACAT1	acetyl-Coenzyme A acetyltransferase 1 (acetoacetyl Coenzyme A thiolase)	gga00071:Fatty acid metabolism,gga00072:Synthesis and degradation of ketone bodies,gga00280:Valine, leucine and isoleucine degradation,gga00310:Lysine degradation,gga00380:Tryptophan metabolism,gga00620:Pyruvate metabolism,gga00640:Propanoate metabolism,g
GT_EA606_A_87_P198933	1.67994	0.0118524	ENSGALT00000027718	ACAT1	acetyl-Coenzyme A acetyltransferase 1 (acetoacetyl Coenzyme A thiolase)	gga00071:Fatty acid metabolism,gga00072:Synthesis and degradation of ketone bodies,gga00280:Valine, leucine and isoleucine degradation,gga00310:Lysine degradation,gga00380:Tryptophan metabolism,gga00620:Pyruvate metabolism,gga00640:Propanoate metabolism,g
GT_EA606_A_87_P036971	1.39913	0.0573048	NM_001006571	ACAA2	acetyl-Coenzyme A acyltransferase 2 (mitochondrial 3-oxoacyl-Coenzyme A thiolase)	gga00062:Fatty acid elongation in mitochondria,gga00071:Fatty acid metabolism,gga00280:Valine, leucine and isoleucine degradation,
GT_EA606_A_87_P036629	1.71144	0.0018259	NM_001039291	ACP1	acid phosphatase 1, soluble	gga00740:Riboflavin metabolism,
GT_EA606_A_87_P326772	1.03376	0.00783259	NM_001039291	ACP1	acid phosphatase 1, soluble	gga00740:Riboflavin metabolism,
GT_EA606_A_87_P009809	1.29786	0.000716349	NM_001030536	ACO1	aconitase 1, soluble	gga00020:Citrate cycle (TCA cycle),gga00630:Glyoxylate and dicarboxylate metabolism,
GT_EA606_A_87_P192168	1.18622	0.0140121	NM_001030536	ACO1	aconitase 1, soluble	gga00020:Citrate cycle (TCA cycle),gga00630:Glyoxylate and dicarboxylate metabolism,
GT_EA606_A_87_P294808	2.44718	0.0440324	NM_001079495	ARPC1A	actin related protein 2/3 complex, subunit 1A, 41kDa	gga04810:Regulation of actin cytoskeleton,
GT_EA606_A_87_P279273	1.67983	0.00650508	ENSGALT00000018675	ARPC2	actin related protein 2/3 complex, subunit 2, 34kDa	gga04810:Regulation of actin cytoskeleton,
GT_EA606_A_87_P018624	1.12076	0.0180788	ENSGALT00000010814	ARPC4	actin related protein 2/3 complex, subunit 4, 20kDa	gga04810:Regulation of actin cytoskeleton,
GT_EA606_A_87_P056391	2.64607	0.0107618	NM_001031237	ACSL5	acyl-CoA synthetase long-chain family member 5	gga00071:Fatty acid metabolism,gga03320:PPAR signaling pathway,gga04920:Adipocytokine signaling pathway,
GT_EA606_A_87_P034246	2.95253	0.154205	ENSGALT00000003444	ACSM3	acyl-CoA synthetase medium-chain family member 3	gga00650:Butanoate metabolism,
GT_EA606_A_87_P148903	2.59033	0.140211	XM_415011	ACSS1	acyl-CoA synthetase short-chain family member 1	gga00010:Glycolysis / Gluconeogenesis,gga00620:Pyruvate metabolism,gga00640:Propanoate metabolism,
GT_EA606_A_87_P106628	1.09592	0.104252	ENSGALT00000038403	ACSS3	acyl-CoA synthetase short-chain family member 3	gga00640:Propanoate metabolism,
GT_EA606_A_87_P031449	4.18161	0.0355607	ENSGALT00000011555	ACOX2	acyl-Coenzyme A oxidase 2, branched chain	gga00120:Primary bile acid biosynthesis,gga03320:PPAR signaling pathway,
GT_EA606_A_87_P164803	2.75444	0.0405994	ENSGALT00000011555	ACOX2	acyl-Coenzyme A oxidase 2, branched chain	gga00120:Primary bile acid biosynthesis,gga03320:PPAR signaling pathway,
GT_EA606_A_87_P030932	1.59901	0.0883249	ENSGALT00000020996	AGK	acylglycerol kinase	gga00561:Glycerolipid metabolism,
GT_EA606_A_87_P107688	1.37571	0.177487	ENSGALT00000037586	AGK	acylglycerol kinase	gga00561:Glycerolipid metabolism,
GT_EA606_A_87_P256358	1.69379	0.126812	ENSGALT00000020996	AGK	acylglycerol kinase	gga00561:Glycerolipid metabolism,
GT_EA606_A_87_P023880	1.84333	0.0378207	NM_001030008	AP1S3	adaptor-related protein complex 1, sigma 3 subunit	gga04142:Lysosome,
GT_EA606_A_87_P151388	2.54413	0.0520029	NM_001030008	AP1S3	adaptor-related protein complex 1, sigma 3 subunit	gga04142:Lysosome,
GT_EA606_A_87_P231753	1.98046	0.201034	NM_001012896	AP2A2	adaptor-related protein complex 2, alpha 2 subunit	gga04144:Endocytosis,
GT_EA606_A_87_P269883	1.17929	0.00396055	NM_001012896	AP2A2	adaptor-related protein complex 2, alpha 2 subunit	gga04144:Endocytosis,
GT_EA606_A_87_P061466	2.09078	0.174532	ENSGALT00000005799	AP3M2	adaptor-related protein complex 3, mu 2 subunit	gga04142:Lysosome,
GT_EA606_A_87_P093471	1.36735	0.0635925	ENSGALT00000037529	AP3S1	adaptor-related protein complex 3, sigma 1 subunit	gga04142:Lysosome,
GT_EA606_A_87_P016523	1.91592	0.0517879	ENSGALT00000016156	AP4S1	adaptor-related protein complex 4, sigma 1 subunit	gga04142:Lysosome,
GT_EA606_A_87_P069686	1.27919	0.105707	ENSGALT00000033891	ADORA2A	adenosine A2a receptor	gga04020:Calcium signaling pathway,gga04080:Neuroactive ligand-receptor interaction,gga04270:Vascular smooth muscle contraction,
GT_EA606_A_87_P208248	1.13852	0.0328562	NM_001006290	ADA	adenosine deaminase	gga00230:Purine metabolism,
GT_EA606_A_87_P200168	2.1448	0.162078	NM_001006501	ADK	adenosine kinase	gga00230:Purine metabolism,
GT_EA606_A_87_P011707	1.76564	0.00878625	NM_001012569	AMD1	adenosylmethionine decarboxylase 1	gga00270:Cysteine and methionine metabolism,gga00330:Arginine and proline metabolism,
GT_EA606_A_87_P099396	2.36855	0.0151861	NM_001012569	AMD1	adenosylmethionine decarboxylase 1	gga00270:Cysteine and methionine metabolism,gga00330:Arginine and proline metabolism,
GT_EA606_A_87_P118033	2.18747	0.0729399	NM_001012569	AMD1	adenosylmethionine decarboxylase 1	gga00270:Cysteine and methionine metabolism,gga00330:Arginine and proline metabolism,
GT_EA606_A_87_P115723	1.17547	0.0116232	ENSGALT00000014654	AK5	adenylate kinase 5	gga00230:Purine metabolism,
GT_EA606_A_87_P072686	1.42689	0.00298195	ENSGALT00000002157	ADRA1B	adrenergic, alpha-1B-, receptor	gga04020:Calcium signaling pathway,gga04080:Neuroactive ligand-receptor interaction,gga04270:Vascular smooth muscle contraction,
GT_EA606_A_87_P091766	2.24115	0.0149743	ENSGALT00000005433	AGXT2	alanine-glyoxylate aminotransferase 2	gga00250:Alanine, aspartate and glutamate metabolism,gga00260:Glycine, serine and threonine metabolism,
GT_EA606_A_87_P008907	2.14545	0.130832	NM_204577	ALDH1A1	aldehyde dehydrogenase 1 family, member A1	gga00830:Retinol metabolism,
GT_EA606_A_87_P022366	1.13317	0.0164264	ENSGALT00000007523	ALDH2	aldehyde dehydrogenase 2 family (mitochondrial)	gga00010:Glycolysis / Gluconeogenesis,gga00053:Ascorbate and aldarate metabolism,gga00071:Fatty acid metabolism,gga00280:Valine, leucine and isoleucine degradation,gga00310:Lysine degradation,gga00330:Arginine and proline metabolism,gga00340:Histidine met
GT_EA606_A_87_P255813	1.99556	0.248168	ENSGALT00000007523	ALDH2	aldehyde dehydrogenase 2 family (mitochondrial)	gga00010:Glycolysis / Gluconeogenesis,gga00053:Ascorbate and aldarate metabolism,gga00071:Fatty acid metabolism,gga00280:Valine, leucine and isoleucine degradation,gga00310:Lysine degradation,gga00330:Arginine and proline metabolism,gga00340:Histidine met
GT_EA606_A_87_P272788	1.26064	0.0119688	ENSGALT00000007523	ALDH2	aldehyde dehydrogenase 2 family (mitochondrial)	gga00010:Glycolysis / Gluconeogenesis,gga00053:Ascorbate and aldarate metabolism,gga00071:Fatty acid metabolism,gga00280:Valine, leucine and isoleucine degradation,gga00310:Lysine degradation,gga00330:Arginine and proline metabolism,gga00340:Histidine met
GT_EA606_A_87_P300168	1.14575	0.0347744	NM_001006223	ALDH3A2	aldehyde dehydrogenase 3 family, member A2	gga00010:Glycolysis / Gluconeogenesis,gga00053:Ascorbate and aldarate metabolism,gga00071:Fatty acid metabolism,gga00280:Valine, leucine and isoleucine degradation,gga00310:Lysine degradation,gga00330:Arginine and proline metabolism,gga00340:Histidine met
GT_EA606_A_87_P010787	1.10853	0.0669434	NM_001252104	ALDH4A1	aldehyde dehydrogenase 4 family, member A1	gga00250:Alanine, aspartate and glutamate metabolism,gga00330:Arginine and proline metabolism,
GT_EA606_A_87_P151668	1.3451	0.238609	ENSGALT00000013392	ALDH7A1	aldehyde dehydrogenase 7 family, member A1	gga00010:Glycolysis / Gluconeogenesis,gga00053:Ascorbate and aldarate metabolism,gga00071:Fatty acid metabolism,gga00280:Valine, leucine and isoleucine degradation,gga00310:Lysine degradation,gga00330:Arginine and proline metabolism,gga00340:Histidine met
GT_EA606_A_87_P298163	1.88859	0.196236	ENSGALT00000013392	ALDH7A1	aldehyde dehydrogenase 7 family, member A1	gga00010:Glycolysis / Gluconeogenesis,gga00053:Ascorbate and aldarate metabolism,gga00071:Fatty acid metabolism,gga00280:Valine, leucine and isoleucine degradation,gga00310:Lysine degradation,gga00330:Arginine and proline metabolism,gga00340:Histidine met
GT_EA606_A_87_P228593	2.25067	0.0133253	ENSGALT00000016649	AKR1A1	aldo-keto reductase family 1, member A1 (aldehyde reductase)	gga00010:Glycolysis / Gluconeogenesis,gga00561:Glycerolipid metabolism,
GT_EA606_A_87_P018374	1.37765	0.0467429	NM_001007977	ALDOB	aldolase B, fructose-bisphosphate	gga00010:Glycolysis / Gluconeogenesis,gga00030:Pentose phosphate pathway,gga00051:Fructose and mannose metabolism,
GT_EA606_A_87_P093286	1.57525	0.078863	NM_001007977	ALDOB	aldolase B, fructose-bisphosphate	gga00010:Glycolysis / Gluconeogenesis,gga00030:Pentose phosphate pathway,gga00051:Fructose and mannose metabolism,
GT_EA606_A_87_P194478	2.79739	0.0476965	NM_001007977	ALDOB	aldolase B, fructose-bisphosphate	gga00010:Glycolysis / Gluconeogenesis,gga00030:Pentose phosphate pathway,gga00051:Fructose and mannose metabolism,
GT_EA606_A_87_P056331	1.63546	0.0454659	NM_001031448	AMACR	alpha-methylacyl-CoA racemase	gga00120:Primary bile acid biosynthesis,
GT_EA606_A_87_P321542	1.75204	0.0790852	ENSGALT00000018623	AMDHD1	amidohydrolase domain containing 1	gga00340:Histidine metabolism,
GT_EA606_A_87_P002348	1.80272	0.0555839	ENSGALT00000019917	ACMSD	aminocarboxymuconate semialdehyde decarboxylase	gga00380:Tryptophan metabolism,
GT_EA606_A_87_P009021	4.08679	0.0658698	NM_205157	AGTR1	angiotensin II receptor, type 1	gga04020:Calcium signaling pathway,gga04080:Neuroactive ligand-receptor interaction,gga04270:Vascular smooth muscle contraction,gga04614:Renin-angiotensin system,
GT_EA606_A_87_P094021	2.9092	0.00886554	ENSGALT00000009554	AGTR2	angiotensin II receptor, type 2	gga04080:Neuroactive ligand-receptor interaction,gga04614:Renin-angiotensin system,
GT_EA606_A_87_P059426	2.1835	0.250306	NM_205525	APOA1	apolipoprotein A-I	gga03320:PPAR signaling pathway,
GT_EA606_A_87_P088151	2.82419	0.157577	NM_205525	APOA1	apolipoprotein A-I	gga03320:PPAR signaling pathway,
GT_EA606_A_87_P009232	1.74889	0.215648	NM_001031479	AVPR2	arginine vasopressin receptor 2 (nephrogenic diabetes insipidus)	gga04080:Neuroactive ligand-receptor interaction,
GT_EA606_A_87_P317822	2.46992	0.058141	ENSGALT00000039984	ASL2	argininosuccinate lyase	gga00250:Alanine, aspartate and glutamate metabolism,gga00330:Arginine and proline metabolism,
GT_EA606_A_87_P012102	1.15752	0.252661	NM_001013395	ASS1	argininosuccinate synthetase 1; hypothetical LOC425164	gga00250:Alanine, aspartate and glutamate metabolism,gga00330:Arginine and proline metabolism,
GT_EA606_A_87_P056941	1.79047	0.0162298	NM_001013395	ASS1	argininosuccinate synthetase 1; hypothetical LOC425164	gga00250:Alanine, aspartate and glutamate metabolism,gga00330:Arginine and proline metabolism,
GT_EA606_A_87_P037002	2.05167	0.162465	NM_001030607	RARS	arginyl-tRNA synthetase	gga00970:Aminoacyl-tRNA biosynthesis,
GT_EA606_A_87_P033317	1.86875	0.0113374	ENSGALT00000003218	ALG1	asparagine-linked glycosylation 1, beta-1,4-mannosyltransferase homolog (S. cerevisiae)	gga00510:N-Glycan biosynthesis,
GT_EA606_A_87_P111138	1.73408	0.000687774	ENSGALT00000036464	ALG5	asparagine-linked glycosylation 5 homolog (S. cerevisiae, dolichyl-phosphate beta-glucosyltransferase)	gga00510:N-Glycan biosynthesis,
GT_EA606_A_87_P057426	2.02968	0.00724363	NM_204435	ALG6	asparagine-linked glycosylation 6 homolog (S. cerevisiae, alpha-1,3-glucosyltransferase)	gga00510:N-Glycan biosynthesis,
GT_EA606_A_87_P007868	3.29977	0.00654049	ENSGALT00000030044	ALG8	asparagine-linked glycosylation 8 homolog (S. cerevisiae, alpha-1,3-glucosyltransferase)	gga00510:N-Glycan biosynthesis,
GT_EA606_A_87_P274803	2.74108	0.069972	NM_001031400	NARS	asparaginyl-tRNA synthetase	gga00970:Aminoacyl-tRNA biosynthesis,
GT_EA606_A_87_P152688	1.32518	0.180756	ENSGALT00000027904	NARS2	asparaginyl-tRNA synthetase 2, mitochondrial (putative)	gga00970:Aminoacyl-tRNA biosynthesis,
GT_EA606_A_87_P036450	1.44781	0.0899259	NM_001006528	DARS	aspartyl-tRNA synthetase	gga00970:Aminoacyl-tRNA biosynthesis,
GT_EA606_A_87_P193103	1.45249	0.0351351	NM_001006528	DARS	aspartyl-tRNA synthetase	gga00970:Aminoacyl-tRNA biosynthesis,
GT_EA606_A_87_P230263	2.09986	0.0815608	NM_001006528	DARS	aspartyl-tRNA synthetase	gga00970:Aminoacyl-tRNA biosynthesis,
GT_EA606_A_87_P035998	1.65953	0.0626094	NM_001006409	ATG5	ATG5 autophagy related 5 homolog (S. cerevisiae)	gga04140:Regulation of autophagy,gga04622:RIG-I-like receptor signaling pathway,
GT_EA606_A_87_P073721	3.09158	0.0264719	NM_001030592	ATG7	ATG7 autophagy related 7 homolog (S. cerevisiae)	gga04140:Regulation of autophagy,
GT_EA606_A_87_P060546	2.67993	0.00690762	ENSGALT00000036313	ATP5A1W	ATP synthase subunit alpha	gga00190:Oxidative phosphorylation,
GT_EA606_A_87_P060551	1.76496	0.0595599	ENSGALT00000036312	ATP5A1W	ATP synthase subunit alpha	gga00190:Oxidative phosphorylation,
GT_EA606_A_87_P023616	2.78952	0.00399932	ENSGALT00000002207	ATP5F1	ATP synthase, H+ transporting, mitochondrial F0 complex, subunit B1	gga00190:Oxidative phosphorylation,
GT_EA606_A_87_P198694	1.87304	0.0115542	ENSGALT00000002026	ATP5G1	ATP synthase, H+ transporting, mitochondrial F0 complex, subunit C1 (subunit 9)	gga00190:Oxidative phosphorylation,
GT_EA606_A_87_P060556	1.41818	0.0134445	NM_204286	ATP5A1	ATP synthase, H+ transporting, mitochondrial F1 complex, alpha subunit 1, cardiac muscle; similar to mitochondrial ATP synthase alpha subunit	gga00190:Oxidative phosphorylation,
GT_EA606_A_87_P091481	2.06598	0.0871538	NM_204286	ATP5A1	ATP synthase, H+ transporting, mitochondrial F1 complex, alpha subunit 1, cardiac muscle; similar to mitochondrial ATP synthase alpha subunit	gga00190:Oxidative phosphorylation,
GT_EA606_A_87_P091486	2.66137	0.161178	NM_204286	ATP5A1	ATP synthase, H+ transporting, mitochondrial F1 complex, alpha subunit 1, cardiac muscle; similar to mitochondrial ATP synthase alpha subunit	gga00190:Oxidative phosphorylation,
GT_EA606_A_87_P069131	1.21588	0.0955278	ENSGALT00000039313	ATP2A2	ATPase, Ca++ transporting, cardiac muscle, slow twitch 2	gga04020:Calcium signaling pathway,
GT_EA606_A_87_P069136	2.30595	0.0220005	ENSGALT00000006087	ATP2A2	ATPase, Ca++ transporting, cardiac muscle, slow twitch 2	gga04020:Calcium signaling pathway,
GT_EA606_A_87_P212583	1.24013	0.053893	ENSGALT00000011643	ATP6V1G1	ATPase, H+ transporting, lysosomal 13kDa, V1 subunit G1	gga00190:Oxidative phosphorylation,
GT_EA606_A_87_P036656	2.65301	0.0545843	NM_001006246	ATP6V1E1	ATPase, H+ transporting, lysosomal 31kDa, V1 subunit E1	gga00190:Oxidative phosphorylation,
GT_EA606_A_87_P142796	2.8555	0.13424	NM_001197326	ATP6V1H	ATPase, H+ transporting, lysosomal 50/57kDa, V1 subunit H	gga00190:Oxidative phosphorylation,gga04142:Lysosome,
GT_EA606_A_87_P309530	2.2568	0.129415	NM_001197326	ATP6V1H	ATPase, H+ transporting, lysosomal 50/57kDa, V1 subunit H	gga00190:Oxidative phosphorylation,gga04142:Lysosome,
GT_EA606_A_87_P061321	1.10625	0.00453172	ENSGALT00000040874	ATP6V1B2	ATPase, H+ transporting, lysosomal 56/58kDa, V1 subunit B2	gga00190:Oxidative phosphorylation,
GT_EA606_A_87_P012502	1.4266	0.0986152	NM_204974	ATP6V1A	ATPase, H+ transporting, lysosomal 70kDa, V1 subunit A; similar to A2 isoform of vacuolar H+-ATPase subunit A	gga00190:Oxidative phosphorylation,
GT_EA606_A_87_P108608	2.23787	0.0491133	NM_204974	ATP6V1A	ATPase, H+ transporting, lysosomal 70kDa, V1 subunit A; similar to A2 isoform of vacuolar H+-ATPase subunit A	gga00190:Oxidative phosphorylation,
GT_EA606_A_87_P131023	1.91745	0.104406	NM_204974	ATP6V1A	ATPase, H+ transporting, lysosomal 70kDa, V1 subunit A; similar to A2 isoform of vacuolar H+-ATPase subunit A	gga00190:Oxidative phosphorylation,
GT_EA606_A_87_P214063	2.97791	0.0472029	NM_001252611	ATP6AP1	ATPase, H+ transporting, lysosomal accessory protein 1	gga00190:Oxidative phosphorylation,gga04142:Lysosome,
GT_EA606_A_87_P301553	3.02929	0.0376699	NM_001252611	ATP6AP1	ATPase, H+ transporting, lysosomal accessory protein 1	gga00190:Oxidative phosphorylation,gga04142:Lysosome,
GT_EA606_A_87_P013532	1.24795	0.0167913	CR391341	ATP6V0A1	ATPase, H+ transporting, lysosomal V0 subunit a1	gga00190:Oxidative phosphorylation,gga04142:Lysosome,
GT_EA606_A_87_P116798	2.05869	0.0160003	NM_204724	ATP6V0A1	ATPase, H+ transporting, lysosomal V0 subunit a1	gga00190:Oxidative phosphorylation,gga04142:Lysosome,
GT_EA606_A_87_P241083	2.05351	0.0129117	ENSGALT00000005153	ATP6V0A1	ATPase, H+ transporting, lysosomal V0 subunit a1	gga00190:Oxidative phosphorylation,gga04142:Lysosome,
GT_EA606_A_87_P036183	4.74669	0.128127	NM_001030909	ATP12A	ATPase, H+/K+ transporting, nongastric, alpha polypeptide	gga00190:Oxidative phosphorylation,
GT_EA606_A_87_P059416	2.14846	0.14774	NM_205521	ATP1A1	ATPase, Na+/K+ transporting, alpha 1 polypeptide; similar to Sodium/potassium-transporting ATPase alpha-2 chain (Sodium pump 2) (Na+/K+ ATPase 2)	gga04260:Cardiac muscle contraction,
GT_EA606_A_87_P009550	1.28944	0.0415837	NM_205520	ATP1B1	ATPase, Na+/K+ transporting, beta 1 polypeptide	gga04260:Cardiac muscle contraction,
GT_EA606_A_87_P108873	2.76282	0.00318916	NM_205520	ATP1B1	ATPase, Na+/K+ transporting, beta 1 polypeptide	gga04260:Cardiac muscle contraction,
GT_EA606_A_87_P274313	1.64483	0.0924372	NM_205520	ATP1B1	ATPase, Na+/K+ transporting, beta 1 polypeptide	gga04260:Cardiac muscle contraction,
GT_EA606_A_87_P009506	2.63362	0.0163955	NM_205535	ATP1B3	ATPase, Na+/K+ transporting, beta 3 polypeptide	gga04260:Cardiac muscle contraction,
GT_EA606_A_87_P300278	2.40419	0.023531	NM_205535	ATP1B3	ATPase, Na+/K+ transporting, beta 3 polypeptide	gga04260:Cardiac muscle contraction,
GT_EA606_A_87_P012641	1.2438	0.0372002	ENSGALT00000018079	ABCB10	ATP-binding cassette, sub-family B (MDR/TAP), member 10	gga02010:ABC transporters,
GT_EA606_A_87_P010756	1.71359	0.0245493	ENSGALT00000011965	ABCC2	ATP-binding cassette, sub-family C (CFTR/MRP), member 2	gga02010:ABC transporters,
GT_EA606_A_87_P156818	1.79056	0.101992	ENSGALT00000011965	ABCC2	ATP-binding cassette, sub-family C (CFTR/MRP), member 2	gga02010:ABC transporters,
GT_EA606_A_87_P031283	1.24171	0.0260167	ENSGALT00000040097	ABCG2	ATP-binding cassette, sub-family G (WHITE), member 2	gga02010:ABC transporters,
GT_EA606_A_87_P164868	1.37487	0.0128794	ENSGALT00000040097	ABCG2	ATP-binding cassette, sub-family G (WHITE), member 2	gga02010:ABC transporters,
GT_EA606_A_87_P070871	2.04626	0.0118127	ENSGALT00000033524	AURKA	aurora kinase A	gga04114:Oocyte meiosis,
GT_EA606_A_87_P208843	3.16419	0.020169	ENSGALT00000033524	AURKA	aurora kinase A	gga04114:Oocyte meiosis,
GT_EA606_A_87_P223948	1.52518	0.0877702	NM_001007822	BIRC2	baculoviral IAP repeat-containing 2	gga04120:Ubiquitin mediated proteolysis,gga04210:Apoptosis,gga04510:Focal adhesion,gga04621:NOD-like receptor signaling pathway,
GT_EA606_A_87_P035511	1.50284	0.000551808	NM_001031527	B3GAT2	beta-1,3-glucuronyltransferase 2 (glucuronosyltransferase S)	gga00532:Chondroitin sulfate biosynthesis,gga00534:Heparan sulfate biosynthesis,
GT_EA606_A_87_P077991	1.59872	0.0796925	ENSGALT00000015525	B3GALNT1	beta-1,3-N-acetylgalactosaminyltransferase 1 (globoside blood group)	gga00603:Glycosphingolipid biosynthesis,
GT_EA606_A_87_P025835	2.28709	0.016069	ENSGALT00000020178	BLVRA	biliverdin reductase A	gga00860:Porphyrin and chlorophyll metabolism,
GT_EA606_A_87_P236688	1.4226	0.214251	NM_001031173	BET1L	blocked early in transport 1 homolog (S. cerevisiae)-like	gga04130:SNARE interactions in vesicular transport,
GT_EA606_A_87_P027875	1.42205	0.149378	ENSGALT00000020862	BMP6	bone morphogenetic protein 6	gga04340:Hedgehog signaling pathway,gga04350:TGF-beta signaling pathway,
GT_EA606_A_87_P038168	1.93303	0.00411892	NM_204657	BCKDHB	branched chain keto acid dehydrogenase E1, beta polypeptide (maple syrup urine disease)	gga00280:Valine, leucine and isoleucine degradation,
GT_EA606_A_87_P058456	1.13551	0.0757278	NM_204657	BCKDHB	branched chain keto acid dehydrogenase E1, beta polypeptide (maple syrup urine disease)	gga00280:Valine, leucine and isoleucine degradation,
GT_EA606_A_87_P023576	2.60131	0.0354159	ENSGALT00000021712	BBOX1	butyrobetaine (gamma), 2-oxoglutarate dioxygenase (gamma-butyrobetaine hydroxylase) 1	gga00310:Lysine degradation,
GT_EA606_A_87_P024205	3.33357	0.0212226	ENSGALT00000013866	C1GALT1C1	C1GALT1-specific chaperone 1	gga00512:O-Glycan biosynthesis,
GT_EA606_A_87_P094616	2.73055	0.0267352	ENSGALT00000013866	C1GALT1C1	C1GALT1-specific chaperone 1	gga00512:O-Glycan biosynthesis,
GT_EA606_A_87_P113383	3.11192	0.0169675	ENSGALT00000013866	C1GALT1C1	C1GALT1-specific chaperone 1	gga00512:O-Glycan biosynthesis,
GT_EA606_A_87_P148683	3.23837	0.0142501	ENSGALT00000013866	C1GALT1C1	C1GALT1-specific chaperone 1	gga00512:O-Glycan biosynthesis,
GT_EA606_A_87_P009397	1.6532	0.00358369	NM_001039258	CDH1	cadherin 1, type 1, E-cadherin (epithelial)	gga04514:Cell adhesion molecules (CAMs),gga04520:Adherens junction,
GT_EA606_A_87_P192728	1.99191	0.0781834	NM_001007930	CHP	calcium binding protein P22	gga04010:MAPK signaling pathway,gga04020:Calcium signaling pathway,gga04114:Oocyte meiosis,gga04210:Apoptosis,gga04310:Wnt signaling pathway,gga04370:VEGF signaling pathway,gga04650:Natural killer cell mediated cytotoxicity,
GT_EA606_A_87_P022505	1.16222	0.032416	ENSGALT00000007248	CACYBP	calcyclin binding protein	gga04310:Wnt signaling pathway,
GT_EA606_A_87_P055366	1.2949	0.0314597	NM_204158	CALD1	caldesmon 1	gga04270:Vascular smooth muscle contraction,
GT_EA606_A_87_P012436	1.20714	0.258337	ENSGALT00000021004	CREB3L2	cAMP responsive element binding protein 3-like 2	gga04916:Melanogenesis,
GT_EA606_A_87_P241543	1.45495	0.0384729	XM_416356	CREB3L2	cAMP responsive element binding protein 3-like 2	gga04916:Melanogenesis,
GT_EA606_A_87_P021772	1.58609	0.00190088	BX936184	CRLS1	cardiolipin synthase 1	gga00564:Glycerophospholipid metabolism,
GT_EA606_A_87_P022198	1.76007	0.0141632	ENSGALT00000014998	CRLS1	cardiolipin synthase 1	gga00564:Glycerophospholipid metabolism,
GT_EA606_A_87_P079481	1.7142	0.0275695	ENSGALT00000038198	CPT2	carnitine palmitoyltransferase II	gga00071:Fatty acid metabolism,gga03320:PPAR signaling pathway,
GT_EA606_A_87_P037972	1.04836	0.0490117	NM_205053	CSNK1A1	casein kinase 1, alpha 1	gga04310:Wnt signaling pathway,gga04340:Hedgehog signaling pathway,
GT_EA606_A_87_P207185	1.29003	0.0709254	DR412792	CSNK1A1	casein kinase 1, alpha 1	gga04310:Wnt signaling pathway,gga04340:Hedgehog signaling pathway,
GT_EA606_A_87_P019851	2.84992	0.0211196	NM_001202462	CFLAR	CASP8 and FADD-like apoptosis regulator	gga04210:Apoptosis,
GT_EA606_A_87_P120908	1.91858	0.0347446	NM_204725	CASP3	caspase 3, apoptosis-related cysteine peptidase	gga04010:MAPK signaling pathway,gga04115:p53 signaling pathway,gga04210:Apoptosis,gga04650:Natural killer cell mediated cytotoxicity,
GT_EA606_A_87_P081191	1.3423	0.0103833	ENSGALT00000014519	CASP7	caspase 7, apoptosis-related cysteine peptidase	gga04210:Apoptosis,
GT_EA606_A_87_P196368	1.57255	0.0345513	NM_001030767	CECR1	cat eye syndrome chromosome region, candidate 1	gga00230:Purine metabolism,
GT_EA606_A_87_P156188	1.8048	0.419281	NM_001199536	CTNNA3	catenin (cadherin-associated protein), alpha 3	gga04520:Adherens junction,gga04530:Tight junction,
GT_EA606_A_87_P147833	1.39744	0.0211548	ENSGALT00000011020	CTNNBL1	catenin, beta like 1	gga03040:Spliceosome,
GT_EA606_A_87_P023577	3.09752	0.00608171	NM_001168009	CTSL2	cathepsin L2	gga04142:Lysosome,
GT_EA606_A_87_P301023	3.84346	0.00887183	NM_001168009	CTSL2	cathepsin L2	gga04142:Lysosome,
GT_EA606_A_87_P004055	2.9318	0.000801014	ENSGALT00000012067	CTSZ	cathepsin Z	gga04142:Lysosome,
GT_EA606_A_87_P199603	2.75789	0.0106388	ENSGALT00000012067	CTSZ	cathepsin Z	gga04142:Lysosome,
GT_EA606_A_87_P009527	1.27745	0.0148072	NM_001105664	CAV1	caveolin 1, caveolae protein, 22kDa	gga04510:Focal adhesion,
GT_EA606_A_87_P022559	2.23726	0.0374883	NM_001007086	CAV2	caveolin 2	gga04510:Focal adhesion,
GT_EA606_A_87_P035189	3.57823	0.0352613	NM_204370	CAV3	caveolin 3	gga04510:Focal adhesion,
GT_EA606_A_87_P150338	3.86241	0.029989	NM_204370	CAV3	caveolin 3	gga04510:Focal adhesion,
GT_EA606_A_87_P016337	1.77218	0.0122868	NM_204860	CD44	CD44 molecule (Indian blood group)	gga04512:ECM-receptor interaction,
GT_EA606_A_87_P192438	1.23409	0.0373988	NM_001008470	CD82	CD82 molecule; similar to CD82 molecule	gga04115:p53 signaling pathway,
GT_EA606_A_87_P263953	1.3465	0.00313954	NM_001008470	CD82	CD82 molecule; similar to CD82 molecule	gga04115:p53 signaling pathway,
GT_EA606_A_87_P152553	2.03584	0.0129267	ENSGALT00000041401	CD99	CD99 molecule	gga04514:Cell adhesion molecules (CAMs),
GT_EA606_A_87_P095516	1.38	0.182867	ENSGALT00000018315	CDS1	CDP-diacylglycerol synthase (phosphatidate cytidylyltransferase) 1	gga00564:Glycerophospholipid metabolism,gga04070:Phosphatidylinositol signaling system,
GT_EA606_A_87_P235728	2.68146	0.0321618	ENSGALT00000000221	CDS2	CDP-diacylglycerol synthase (phosphatidate cytidylyltransferase) 2	gga00564:Glycerophospholipid metabolism,gga04070:Phosphatidylinositol signaling system,
GT_EA606_A_87_P290898	1.16673	0.0107637	NM_001006536	CDC20	cell division cycle 20 homolog (S. cerevisiae)	gga04110:Cell cycle,gga04114:Oocyte meiosis,gga04120:Ubiquitin mediated proteolysis,
GT_EA606_A_87_P297258	2.58553	0.13132	NM_001006536	CDC20	cell division cycle 20 homolog (S. cerevisiae)	gga04110:Cell cycle,gga04114:Oocyte meiosis,gga04120:Ubiquitin mediated proteolysis,
GT_EA606_A_87_P065926	1.55341	0.13503	NM_205048	CDC42	cell division cycle 42 (GTP binding protein, 25kDa)	gga04010:MAPK signaling pathway,gga04144:Endocytosis,gga04370:VEGF signaling pathway,gga04510:Focal adhesion,gga04520:Adherens junction,gga04530:Tight junction,gga04810:Regulation of actin cytoskeleton,gga04912:GnRH signaling pathway,
GT_EA606_A_87_P195788	1.62077	0.134287	NM_205048	CDC42	cell division cycle 42 (GTP binding protein, 25kDa)	gga04010:MAPK signaling pathway,gga04144:Endocytosis,gga04370:VEGF signaling pathway,gga04510:Focal adhesion,gga04520:Adherens junction,gga04530:Tight junction,gga04810:Regulation of actin cytoskeleton,gga04912:GnRH signaling pathway,
GT_EA606_A_87_P110773	3.42049	0.00841586	ENSGALT00000027349	CLN5	ceroid-lipofuscinosis, neuronal 5	gga04142:Lysosome,
GT_EA606_A_87_P110028	1.55167	0.109143	NM_204568	FIGF	c-fos induced growth factor (vascular endothelial growth factor D)	gga04060:Cytokine-cytokine receptor interaction,gga04150:mTOR signaling pathway,gga04510:Focal adhesion,
GT_EA606_A_87_P017978	1.6734	0.00855889	CR353382	CXCL12	chemokine (C-X-C motif) ligand 12 (stromal cell-derived factor 1)	gga04060:Cytokine-cytokine receptor interaction,gga04672:Intestinal immune network for IgA production,
GT_EA606_A_87_P194593	2.42973	0.0433605	CR353382	CXCL12	chemokine (C-X-C motif) ligand 12 (stromal cell-derived factor 1)	gga04060:Cytokine-cytokine receptor interaction,gga04672:Intestinal immune network for IgA production,
GT_EA606_A_87_P037721	2.58797	0.174103	NM_204712	CXCL14	chemokine (C-X-C motif) ligand 14	gga04060:Cytokine-cytokine receptor interaction,
GT_EA606_A_87_P058221	2.10449	0.166259	NM_204712	CXCL14	chemokine (C-X-C motif) ligand 14	gga04060:Cytokine-cytokine receptor interaction,
GT_EA606_A_87_P037715	3.06129	0.0285367	NM_204617	CXCR4	chemokine (C-X-C motif) receptor 4	gga04060:Cytokine-cytokine receptor interaction,gga04144:Endocytosis,gga04672:Intestinal immune network for IgA production,
GT_EA606_A_87_P027817	1.74094	0.116967	XM_421516	CSGALNACT2	chondroitin sulfate N-acetylgalactosaminyltransferase 2	gga00532:Chondroitin sulfate biosynthesis,
GT_EA606_A_87_P103448	2.18579	0.0679472	ENSGALT00000021491	CHMP5	chromatin modifying protein 5	gga04144:Endocytosis,
GT_EA606_A_87_P118548	1.56193	0.0276502	ENSGALT00000021491	CHMP5	chromatin modifying protein 5	gga04144:Endocytosis,
GT_EA606_A_87_P037389	1.13934	0.0548196	NM_001080117	CLTC	clathrin, heavy chain (Hc)	gga04142:Lysosome,gga04144:Endocytosis,
GT_EA606_A_87_P298013	2.44686	0.0623477	NM_001080117	CLTC	clathrin, heavy chain (Hc)	gga04142:Lysosome,gga04144:Endocytosis,
GT_EA606_A_87_P035965	1.65693	0.118844	NM_001039313	CLTA	clathrin, light chain (Lca)	gga04142:Lysosome,gga04144:Endocytosis,
GT_EA606_A_87_P248043	2.20251	0.102537	NM_001039313	CLTA	clathrin, light chain (Lca)	gga04142:Lysosome,gga04144:Endocytosis,
GT_EA606_A_87_P280683	1.65665	0.092287	NM_001039313	CLTA	clathrin, light chain (Lca)	gga04142:Lysosome,gga04144:Endocytosis,
GT_EA606_A_87_P054331	1.90834	0.0203926	NM_001013611	CLDN1	claudin 1	gga04514:Cell adhesion molecules (CAMs),gga04530:Tight junction,
GT_EA606_A_87_P192713	1.86929	0.0168777	NM_001013611	CLDN1	claudin 1	gga04514:Cell adhesion molecules (CAMs),gga04530:Tight junction,
GT_EA606_A_87_P021778	3.69515	0.00554103	ENSGALT00000030190	CLDN10	claudin 10	gga04514:Cell adhesion molecules (CAMs),gga04530:Tight junction,
GT_EA606_A_87_P052691	1.08845	0.0392173	NM_204201	CLDN5	claudin 5	gga04514:Cell adhesion molecules (CAMs),gga04530:Tight junction,
GT_EA606_A_87_P009292	2.97293	0.0149513	NM_204605	F2	coagulation factor II (thrombin)	gga04080:Neuroactive ligand-receptor interaction,gga04810:Regulation of actin cytoskeleton,
GT_EA606_A_87_P192393	4.15452	0.00912979	NM_204605	F2	coagulation factor II (thrombin)	gga04080:Neuroactive ligand-receptor interaction,gga04810:Regulation of actin cytoskeleton,
GT_EA606_A_87_P021894	3.14264	0.0129812	ENSGALT00000038562	F2RL2	coagulation factor II (thrombin) receptor-like 2	gga04080:Neuroactive ligand-receptor interaction,
GT_EA606_A_87_P024711	1.6565	0.0514819	ENSGALT00000024973	COQ3	coenzyme Q3 homolog, methyltransferase (S. cerevisiae)	gga00130:Ubiquinone and other terpenoid-quinone biosynthesis,
GT_EA606_A_87_P193663	2.45645	0.00660062	NM_001006194	COQ5	coenzyme Q5 homolog, methyltransferase (S. cerevisiae)	gga00130:Ubiquinone and other terpenoid-quinone biosynthesis,
GT_EA606_A_87_P219748	2.79062	0.13489	ENSGALT00000016576	COQ6	coenzyme Q6 homolog, monooxygenase (S. cerevisiae)	gga00130:Ubiquinone and other terpenoid-quinone biosynthesis,
GT_EA606_A_87_P277113	1.2688	0.0787638	ENSGALT00000016576	COQ6	coenzyme Q6 homolog, monooxygenase (S. cerevisiae)	gga00130:Ubiquinone and other terpenoid-quinone biosynthesis,
GT_EA606_A_87_P022157	1.14428	0.0271107	ENSGALT00000011107	COQ7	coenzyme Q7 homolog, ubiquinone (yeast)	gga00130:Ubiquinone and other terpenoid-quinone biosynthesis,
GT_EA606_A_87_P282153	2.45887	0.0033588	NM_001079714	COL1A2	collagen, type I, alpha 2	gga04510:Focal adhesion,gga04512:ECM-receptor interaction,
GT_EA606_A_87_P081636	1.68165	0.0039797	NM_205380	COL3A1	collagen, type III, alpha 1	gga04510:Focal adhesion,gga04512:ECM-receptor interaction,
GT_EA606_A_87_P081641	2.92446	0.0113661	NM_205380	COL3A1	collagen, type III, alpha 1	gga04510:Focal adhesion,gga04512:ECM-receptor interaction,
GT_EA606_A_87_P261238	1.69956	0.00311214	NM_205380	COL3A1	collagen, type III, alpha 1	gga04510:Focal adhesion,gga04512:ECM-receptor interaction,
GT_EA606_A_87_P073076	2.50986	0.0175623	ENSGALT00000009190	CSF1R	colony stimulating factor 1 receptor, formerly McDonough feline sarcoma viral (v-fms) oncogene homolog	gga04060:Cytokine-cytokine receptor interaction,gga04144:Endocytosis,
GT_EA606_A_87_P193843	1.16354	0.12004	NM_001012557	C1GALT1	core 1 synthase, glycoprotein-N-acetylgalactosamine 3-beta-galactosyltransferase, 1	gga00512:O-Glycan biosynthesis,
GT_EA606_A_87_P252188	1.09087	0.0319057	NM_001012557	C1GALT1	core 1 synthase, glycoprotein-N-acetylgalactosamine 3-beta-galactosyltransferase, 1	gga00512:O-Glycan biosynthesis,
GT_EA606_A_87_P037238	2.64723	0.00378218	NM_204454	CRHR2	corticotropin releasing hormone receptor 2	gga04080:Neuroactive ligand-receptor interaction,
GT_EA606_A_87_P179323	2.57076	0.0562034	NM_205310	CKB	creatine kinase, brain	gga00330:Arginine and proline metabolism,
GT_EA606_A_87_P194733	1.80764	0.0157309	NM_205310	CKB	creatine kinase, brain	gga00330:Arginine and proline metabolism,
GT_EA606_A_87_P267573	2.12273	0.0290517	NM_205310	CKB	creatine kinase, brain	gga00330:Arginine and proline metabolism,
GT_EA606_A_87_P300518	2.03645	0.0375699	NM_205310	CKB	creatine kinase, brain	gga00330:Arginine and proline metabolism,
GT_EA606_A_87_P202448	2.09509	0.0361907	NM_001004369	CCNB2	cyclin B2	gga04110:Cell cycle,gga04114:Oocyte meiosis,gga04115:p53 signaling pathway,gga04914:Progesterone-mediated oocyte maturation,
GT_EA606_A_87_P054286	1.20777	0.113696	NM_204213	CCND2	cyclin D2; similar to cyclin D2	gga04110:Cell cycle,gga04115:p53 signaling pathway,gga04310:Wnt signaling pathway,gga04510:Focal adhesion,gga04630:Jak-STAT signaling pathway,
GT_EA606_A_87_P021851	1.6788	0.0243571	ENSGALT00000002636	CCNG1	cyclin G1	gga04115:p53 signaling pathway,
GT_EA606_A_87_P009266	1.34085	0.0487031	NM_001007892	CDK6	cyclin-dependent kinase 6	gga04110:Cell cycle,gga04115:p53 signaling pathway,
GT_EA606_A_87_P022696	2.95566	0.0182661	ENSGALT00000018492	CTH	cystathionase (cystathionine gamma-lyase)	gga00260:Glycine, serine and threonine metabolism,gga00270:Cysteine and methionine metabolism,gga00450:Selenoamino acid metabolism,gga00910:Nitrogen metabolism,
GT_EA606_A_87_P035735	1.25083	0.0424348	NM_001012583	CARS	cysteinyl-tRNA synthetase	gga00970:Aminoacyl-tRNA biosynthesis,
GT_EA606_A_87_P014310	1.68759	0.0259535	CR390196	COX6C	cytochrome c oxidase subunit VIc	gga00190:Oxidative phosphorylation,gga04260:Cardiac muscle contraction,
GT_EA606_A_87_P097931	1.7173	0.0256815	ENSGALT00000016129	COX7A2L	cytochrome c oxidase subunit VIIa polypeptide 2 like	gga00190:Oxidative phosphorylation,gga04260:Cardiac muscle contraction,
GT_EA606_A_87_P055101	1.68528	0.0050415	NM_001079478	CYCS	cytochrome c, somatic	gga04115:p53 signaling pathway,gga04210:Apoptosis,
GT_EA606_A_87_P032783	1.35738	0.0508532	ENSGALT00000026967	CYP39A1	cytochrome P450, family 39, subfamily A, polypeptide 1	gga00120:Primary bile acid biosynthesis,
GT_EA606_A_87_P209113	2.17807	0.131428	NM_001048077	CYP51A1	cytochrome P450, family 51, subfamily A, polypeptide 1	gga00100:Steroid biosynthesis,
GT_EA606_A_87_P031693	1.81761	0.300156	XM_001234268	DDO	D-aspartate oxidase	gga00250:Alanine, aspartate and glutamate metabolism,
GT_EA606_A_87_P309722	1.85962	0.00797142	NM_001031159	DHX15	DEAH (Asp-Glu-Ala-His) box polypeptide 15; hypothetical LOC425141; similar to putative RNA helicase and RNA dependent ATPase	gga03040:Spliceosome,
GT_EA606_A_87_P156703	1.58782	0.134687	ENSGALT00000001619	DCPS	decapping enzyme, scavenger	gga03018:RNA degradation,
GT_EA606_A_87_P214693	3.36308	0.0272161	NM_001030747	DCN	decorin	gga04350:TGF-beta signaling pathway,
GT_EA606_A_87_P062281	1.68439	0.0139075	NM_001007473	DAD1	defender against cell death 1	gga00510:N-Glycan biosynthesis,
GT_EA606_A_87_P082986	1.38842	0.100443	ENSGALT00000019727	DTX3L	deltex 3-like (Drosophila)	gga04330:Notch signaling pathway,
GT_EA606_A_87_P037201	1.1315	0.00925458	NM_001110842	DTYMK	deoxythymidylate kinase (thymidylate kinase)	gga00240:Pyrimidine metabolism,
GT_EA606_A_87_P099336	1.19307	0.0459959	ENSGALT00000024130	DSE	dermatan sulfate epimerase	gga00532:Chondroitin sulfate biosynthesis,
GT_EA606_A_87_P036826	2.57215	0.0713278	NM_001006584	DHFR	dihydrofolate reductase	gga00670:One carbon pool by folate,gga00790:Folate biosynthesis,
GT_EA606_A_87_P089601	2.87007	0.0867138	NM_001006584	DHFR	dihydrofolate reductase	gga00670:One carbon pool by folate,gga00790:Folate biosynthesis,
GT_EA606_A_87_P115583	2.35596	0.0884094	NM_001006584	DHFR	dihydrofolate reductase	gga00670:One carbon pool by folate,gga00790:Folate biosynthesis,
GT_EA606_A_87_P038167	2.21857	0.0111413	NM_204656	DBT	dihydrolipoamide branched chain transacylase E2	gga00280:Valine, leucine and isoleucine degradation,
GT_EA606_A_87_P231048	1.92837	0.0332754	NM_001030727	DLD	dihydrolipoamide dehydrogenase	gga00010:Glycolysis / Gluconeogenesis,gga00020:Citrate cycle (TCA cycle),gga00260:Glycine, serine and threonine metabolism,gga00280:Valine, leucine and isoleucine degradation,gga00620:Pyruvate metabolism,
GT_EA606_A_87_P263938	1.61286	0.0230457	ENSGALT00000039385	DLD	dihydrolipoamide dehydrogenase	gga00010:Glycolysis / Gluconeogenesis,gga00020:Citrate cycle (TCA cycle),gga00260:Glycine, serine and threonine metabolism,gga00280:Valine, leucine and isoleucine degradation,gga00620:Pyruvate metabolism,
GT_EA606_A_87_P065211	1.30054	0.139344	ENSGALT00000012830	DLAT	dihydrolipoamide S-acetyltransferase (E2 component of pyruvate dehydrogenase complex)	gga00010:Glycolysis / Gluconeogenesis,gga00020:Citrate cycle (TCA cycle),gga00620:Pyruvate metabolism,
GT_EA606_A_87_P254438	1.80164	0.0472285	ENSGALT00000012830	DLAT	dihydrolipoamide S-acetyltransferase (E2 component of pyruvate dehydrogenase complex)	gga00010:Glycolysis / Gluconeogenesis,gga00020:Citrate cycle (TCA cycle),gga00620:Pyruvate metabolism,
GT_EA606_A_87_P021763	1.62826	0.01291	ENSGALT00000025905	DPYS	dihydropyrimidinase	gga00240:Pyrimidine metabolism,gga00410:beta-Alanine metabolism,gga00770:Pantothenate and CoA biosynthesis,gga00983:Drug metabolism,
GT_EA606_A_87_P105053	1.86522	0.172088	ENSGALT00000025905	DPYS	dihydropyrimidinase	gga00240:Pyrimidine metabolism,gga00410:beta-Alanine metabolism,gga00770:Pantothenate and CoA biosynthesis,gga00983:Drug metabolism,
GT_EA606_A_87_P150633	3.16276	0.0533946	ENSGALT00000025905	DPYS	dihydropyrimidinase	gga00240:Pyrimidine metabolism,gga00410:beta-Alanine metabolism,gga00770:Pantothenate and CoA biosynthesis,gga00983:Drug metabolism,
GT_EA606_A_87_P196063	2.40156	0.0428859	ENSGALT00000025905	DPYS	dihydropyrimidinase	gga00240:Pyrimidine metabolism,gga00410:beta-Alanine metabolism,gga00770:Pantothenate and CoA biosynthesis,gga00983:Drug metabolism,
GT_EA606_A_87_P260953	1.61138	0.090479	ENSGALT00000027368	DIS3	DIS3 mitotic control homolog (S. cerevisiae)	gga03018:RNA degradation,
GT_EA606_A_87_P103368	1.55758	0.00652575	ENSGALT00000021376	DDC	dopa decarboxylase (aromatic L-amino acid decarboxylase)	gga00340:Histidine metabolism,gga00350:Tyrosine metabolism,gga00360:Phenylalanine metabolism,gga00380:Tryptophan metabolism,
GT_EA606_A_87_P015922	2.15732	0.0370843	NM_001085359	DUSP1	dual specificity phosphatase 1	gga04010:MAPK signaling pathway,
GT_EA606_A_87_P054086	2.67821	0.108029	NM_001085359	DUSP1	dual specificity phosphatase 1	gga04010:MAPK signaling pathway,
GT_EA606_A_87_P253823	1.81438	0.0107395	NM_001085359	DUSP1	dual specificity phosphatase 1	gga04010:MAPK signaling pathway,
GT_EA606_A_87_P062886	1.7357	0.00674559	ENSGALT00000016146	DUSP3	dual specificity phosphatase 3 (vaccinia virus phosphatase VH1-related)	gga04010:MAPK signaling pathway,
GT_EA606_A_87_P076186	1.36894	0.0951698	NM_001079488	DUT	dUTP pyrophosphatase	gga00240:Pyrimidine metabolism,
GT_EA606_A_87_P238313	1.54066	0.00976192	NM_001079488	DUT	dUTP pyrophosphatase	gga00240:Pyrimidine metabolism,
GT_EA606_A_87_P016810	1.57133	0.095775	NM_001199197	ELOVL5	ELOVL family member 5, elongation of long chain fatty acids (FEN1/Elo2, SUR4/Elo3-like, yeast)	gga01040:Biosynthesis of unsaturated fatty acids,
GT_EA606_A_87_P099976	2.01243	0.0744646	NM_001199197	ELOVL5	ELOVL family member 5, elongation of long chain fatty acids (FEN1/Elo2, SUR4/Elo3-like, yeast)	gga01040:Biosynthesis of unsaturated fatty acids,
GT_EA606_A_87_P037592	3.15987	0.0325263	NM_204119	EDNRA	endothelin receptor type A	gga04020:Calcium signaling pathway,gga04080:Neuroactive ligand-receptor interaction,gga04270:Vascular smooth muscle contraction,
GT_EA606_A_87_P057606	1.51368	0.143986	NM_001001127	EDNRB	endothelin receptor type B	gga04020:Calcium signaling pathway,gga04080:Neuroactive ligand-receptor interaction,gga04916:Melanogenesis,
GT_EA606_A_87_P065581	2.18741	0.0789264	NM_205120	ENO1	enolase 1, (alpha)	gga00010:Glycolysis / Gluconeogenesis,gga03018:RNA degradation,
GT_EA606_A_87_P207838	2.17705	0.0518762	NM_205120	ENO1	enolase 1, (alpha)	gga00010:Glycolysis / Gluconeogenesis,gga03018:RNA degradation,
GT_EA606_A_87_P224458	1.18453	0.138694	NM_204876	ENO2	enolase 2 (gamma, neuronal)	gga00010:Glycolysis / Gluconeogenesis,gga03018:RNA degradation,
GT_EA606_A_87_P011006	1.64486	0.135128	ENSGALT00000018225	ENOPH1	enolase-phosphatase 1	gga00270:Cysteine and methionine metabolism,
GT_EA606_A_87_P024422	2.44295	0.00235739	NM_001001203	EREG	epiregulin	gga04012:ErbB signaling pathway,
GT_EA606_A_87_P013004	1.44959	0.188499	CR406097	EIF4E	eukaryotic translation initiation factor 4E	gga04150:mTOR signaling pathway,gga04910:Insulin signaling pathway,
GT_EA606_A_87_P286043	1.19691	0.0131131	ENSGALT00000005077	EIF4EBP1	eukaryotic translation initiation factor 4E binding protein 1	gga04012:ErbB signaling pathway,gga04150:mTOR signaling pathway,gga04910:Insulin signaling pathway,
GT_EA606_A_87_P017369	1.84864	0.0225887	ENSGALT00000012860	EIF4E2	eukaryotic translation initiation factor 4E family member 2	gga04150:mTOR signaling pathway,gga04910:Insulin signaling pathway,
GT_EA606_A_87_P024073	4.88795	0.0674112	ENSGALT00000023755	ERCC8	excision repair cross-complementing rodent repair deficiency, complementation group 8	gga03420:Nucleotide excision repair,gga04120:Ubiquitin mediated proteolysis,
GT_EA606_A_87_P024478	1.283	0.0105019	NM_001199516	EXOSC3	exosome component 3	gga03018:RNA degradation,
GT_EA606_A_87_P007742	1.46405	0.0633723	ENSGALT00000025965	EXT1	exostoses (multiple) 1	gga00534:Heparan sulfate biosynthesis,
GT_EA606_A_87_P078831	3.02916	0.0832874	ENSGALT00000008410	EXTL2	exostoses (multiple)-like 2	gga00534:Heparan sulfate biosynthesis,
GT_EA606_A_87_P175428	2.01716	0.0155323	XM_422308	EXTL2	exostoses (multiple)-like 2	gga00534:Heparan sulfate biosynthesis,
GT_EA606_A_87_P038194	1.17725	0.0391256	NM_204885	EZR	ezrin	gga04810:Regulation of actin cytoskeleton,
GT_EA606_A_87_P192733	1.57143	0.0255165	NM_204885	EZR	ezrin	gga04810:Regulation of actin cytoskeleton,
GT_EA606_A_87_P080716	1.25145	0.418707	NM_001199487	FAS	Fas (TNF receptor superfamily, member 6)	gga04010:MAPK signaling pathway,gga04060:Cytokine-cytokine receptor interaction,gga04115:p53 signaling pathway,gga04210:Apoptosis,gga04650:Natural killer cell mediated cytotoxicity,
GT_EA606_A_87_P037649	2.55651	0.0589173	NM_204192	FABP1	fatty acid binding protein 1, liver	gga03320:PPAR signaling pathway,
GT_EA606_A_87_P050571	3.7212	0.0211114	NM_001007923	FABP2	fatty acid binding protein 2, intestinal	gga03320:PPAR signaling pathway,
GT_EA606_A_87_P021934	1.45758	0.0404111	NM_001030889	FABP3	fatty acid binding protein 3, muscle and heart (mammary-derived growth inhibitor)	gga03320:PPAR signaling pathway,
GT_EA606_A_87_P064011	1.29346	0.0440193	NM_001030889	FABP3	fatty acid binding protein 3, muscle and heart (mammary-derived growth inhibitor)	gga03320:PPAR signaling pathway,
GT_EA606_A_87_P064021	1.37091	0.0570824	ENSGALT00000000879	FABP3	fatty acid binding protein 3, muscle and heart (mammary-derived growth inhibitor)	gga03320:PPAR signaling pathway,
GT_EA606_A_87_P270093	1.71104	0.0385967	NM_001030889	FABP3	fatty acid binding protein 3, muscle and heart (mammary-derived growth inhibitor)	gga03320:PPAR signaling pathway,
GT_EA606_A_87_P021795	1.53068	0.104664	NM_001006346	FABP5	fatty acid binding protein 5	gga03320:PPAR signaling pathway,
GT_EA606_A_87_P032089	1.33776	0.0745604	ENSGALT00000011547	FADS1	fatty acid desaturase 1	gga01040:Biosynthesis of unsaturated fatty acids,
GT_EA606_A_87_P072581	1.12674	0.0372206	NM_001039262	FBXW11	F-box and WD repeat domain containing 11	gga04114:Oocyte meiosis,gga04120:Ubiquitin mediated proteolysis,gga04310:Wnt signaling pathway,gga04340:Hedgehog signaling pathway,
GT_EA606_A_87_P037797	1.25822	0.274621	NM_204777	FGF14	fibroblast growth factor 14	gga04010:MAPK signaling pathway,gga04810:Regulation of actin cytoskeleton,
GT_EA606_A_87_P037387	2.29731	0.00706241	NM_204579	FMO6P	flavin containing monooxygenase 6 pseudogene; similar to flavin-containing monooxygenase 3	gga00982:Drug metabolism,
GT_EA606_A_87_P058956	3.44159	0.00847319	NM_204579	FMO6P	flavin containing monooxygenase 6 pseudogene; similar to flavin-containing monooxygenase 3	gga00982:Drug metabolism,
GT_EA606_A_87_P078476	4.16799	0.0519884	NM_204579	FMO6P	flavin containing monooxygenase 6 pseudogene; similar to flavin-containing monooxygenase 3	gga00982:Drug metabolism,
GT_EA606_A_87_P038177	1.02608	0.000816499	ENSGALT00000036750	FZD3	frizzled homolog 3 (Drosophila)	gga04310:Wnt signaling pathway,gga04916:Melanogenesis,
GT_EA606_A_87_P114968	2.84172	0.00485373	ENSGALT00000036750	FZD3	frizzled homolog 3 (Drosophila)	gga04310:Wnt signaling pathway,gga04916:Melanogenesis,
GT_EA606_A_87_P021630	1.82463	0.00513112	ENSGALT00000020592	FBP1	fructose-1,6-bisphosphatase 1	gga00010:Glycolysis / Gluconeogenesis,gga00030:Pentose phosphate pathway,gga00051:Fructose and mannose metabolism,gga04910:Insulin signaling pathway,
GT_EA606_A_87_P037474	4.00152	0.0184937	ENSGALT00000020592	FBP1	fructose-1,6-bisphosphatase 1	gga00010:Glycolysis / Gluconeogenesis,gga00030:Pentose phosphate pathway,gga00051:Fructose and mannose metabolism,gga04910:Insulin signaling pathway,
GT_EA606_A_87_P297013	1.39002	0.0677838	ENSGALT00000006539	FUCA1	fucosidase, alpha-L- 1, tissue	gga00511:Other glycan degradation,
GT_EA606_A_87_P022310	2.2862	0.0126873	ENSGALT00000010479	FAH	fumarylacetoacetate hydrolase (fumarylacetoacetase)	gga00350:Tyrosine metabolism,
GT_EA606_A_87_P053196	2.05229	0.0864649	NM_001031332	GTSE1	G-2 and S-phase expressed 1	gga04115:p53 signaling pathway,
GT_EA606_A_87_P032653	1.1693	0.00907077	ENSGALT00000010149	GALNS	galactosamine (N-acetyl)-6-sulfate sulfatase (Morquio syndrome, mucopolysaccharidosis type IVA)	gga00531:Glycosaminoglycan degradation,gga04142:Lysosome,
GT_EA606_A_87_P221183	1.86665	0.0648697	NM_204318	GABRA1	gamma-aminobutyric acid (GABA) A receptor, alpha 1	gga04080:Neuroactive ligand-receptor interaction,
GT_EA606_A_87_P198713	2.8936	0.0126069	NM_204586	GJA1	gap junction protein, alpha 1, 43kDa	gga04540:Gap junction,
GT_EA606_A_87_P035239	1.37882	0.098103	NM_204407	GRPR	gastrin-releasing peptide receptor	gga04020:Calcium signaling pathway,gga04080:Neuroactive ligand-receptor interaction,
GT_EA606_A_87_P037973	1.32129	0.00460422	NM_204934	GSN	gelsolin	gga04810:Regulation of actin cytoskeleton,
GT_EA606_A_87_P199818	1.59638	0.0442384	NM_204934	GSN	gelsolin	gga04810:Regulation of actin cytoskeleton,
GT_EA606_A_87_P054041	1.41571	0.0080739	NM_001081708	GTF2A2	general transcription factor IIA, 2, 12kDa	gga03022:Basal transcription factors,
GT_EA606_A_87_P147043	2.14325	0.00959838	NM_001081708	GTF2A2	general transcription factor IIA, 2, 12kDa	gga03022:Basal transcription factors,
GT_EA606_A_87_P121078	1.916	0.0228861	ENSGALT00000010015	GTF2B	general transcription factor IIB	gga03022:Basal transcription factors,
GT_EA606_A_87_P036137	1.32368	0.0502881	ENSGALT00000016727	GTF2E2	general transcription factor IIE, polypeptide 2, beta 34kDa	gga03022:Basal transcription factors,
GT_EA606_A_87_P095121	1.17167	0.0226537	ENSGALT00000016727	GTF2E2	general transcription factor IIE, polypeptide 2, beta 34kDa	gga03022:Basal transcription factors,
GT_EA606_A_87_P279358	1.69785	0.0877784	ENSGALT00000027426	GTF2F2	general transcription factor IIF, polypeptide 2, 30kDa	gga03022:Basal transcription factors,
GT_EA606_A_87_P022052	1.13059	0.0327351	ENSGALT00000039540	GTF2H3	general transcription factor IIH, polypeptide 3, 34kDa	gga03022:Basal transcription factors,gga03420:Nucleotide excision repair,
GT_EA606_A_87_P154858	1.45167	0.0430899	XM_425536	GBE1	glucan (1,4-alpha-), branching enzyme 1 (glycogen branching enzyme, Andersen disease, glycogen storage disease type IV)	gga00500:Starch and sucrose metabolism,
GT_EA606_A_87_P205588	2.02163	0.152131	NM_001199559	GNS	glucosamine (N-acetyl)-6-sulfatase (Sanfilippo disease IIID)	gga00531:Glycosaminoglycan degradation,gga04142:Lysosome,
GT_EA606_A_87_P036824	2.5497	0.0404485	NM_001006156	GNPDA1	glucosamine-6-phosphate deaminase 1	gga00520:Amino sugar and nucleotide sugar metabolism,
GT_EA606_A_87_P075006	1.29501	0.0553755	ENSGALT00000039314	GPI	glucose phosphate isomerase	gga00010:Glycolysis / Gluconeogenesis,gga00030:Pentose phosphate pathway,gga00500:Starch and sucrose metabolism,gga00520:Amino sugar and nucleotide sugar metabolism,
GT_EA606_A_87_P133168	2.41483	0.0242058	NM_001006128	GPI	glucose phosphate isomerase	gga00010:Glycolysis / Gluconeogenesis,gga00030:Pentose phosphate pathway,gga00500:Starch and sucrose metabolism,gga00520:Amino sugar and nucleotide sugar metabolism,
GT_EA606_A_87_P255853	1.86975	0.0422763	NM_001006128	GPI	glucose phosphate isomerase	gga00010:Glycolysis / Gluconeogenesis,gga00030:Pentose phosphate pathway,gga00500:Starch and sucrose metabolism,gga00520:Amino sugar and nucleotide sugar metabolism,
GT_EA606_A_87_P322177	2.38486	0.0586117	ENSGALT00000007948	GPI	glucose phosphate isomerase	gga00010:Glycolysis / Gluconeogenesis,gga00030:Pentose phosphate pathway,gga00500:Starch and sucrose metabolism,gga00520:Amino sugar and nucleotide sugar metabolism,
GT_EA606_A_87_P057736	1.31491	0.105668	NM_001039316	GUSB	glucuronidase, beta	gga00040:Pentose and glucuronate interconversions,gga00500:Starch and sucrose metabolism,gga00531:Glycosaminoglycan degradation,gga00860:Porphyrin and chlorophyll metabolism,gga00983:Drug metabolism,gga04142:Lysosome,
GT_EA606_A_87_P018688	1.53788	0.0293015	NM_205321	GOT1	glutamic-oxaloacetic transaminase 1, soluble (aspartate aminotransferase 1)	gga00250:Alanine, aspartate and glutamate metabolism,gga00270:Cysteine and methionine metabolism,gga00330:Arginine and proline metabolism,gga00350:Tyrosine metabolism,gga00360:Phenylalanine metabolism,gga00400:Phenylalanine, tyrosine and tryptophan biosyn
GT_EA606_A_87_P193283	1.68795	0.0713369	NM_205321	GOT1	glutamic-oxaloacetic transaminase 1, soluble (aspartate aminotransferase 1)	gga00250:Alanine, aspartate and glutamate metabolism,gga00270:Cysteine and methionine metabolism,gga00330:Arginine and proline metabolism,gga00350:Tyrosine metabolism,gga00360:Phenylalanine metabolism,gga00400:Phenylalanine, tyrosine and tryptophan biosyn
GT_EA606_A_87_P319582	1.52703	0.0910015	ENSGALT00000019779	ENPEP	glutamyl aminopeptidase (aminopeptidase A)	gga04614:Renin-angiotensin system,
GT_EA606_A_87_P009499	1.15561	0.0637699	NM_001001776	GSTA	glutathione S-transferase class-alpha	gga00480:Glutathione metabolism,gga00980:Metabolism of xenobiotics by cytochrome P450,gga00982:Drug metabolism,
GT_EA606_A_87_P222473	2.04151	0.0489952	NM_001001776	GSTA	glutathione S-transferase class-alpha	gga00480:Glutathione metabolism,gga00980:Metabolism of xenobiotics by cytochrome P450,gga00982:Drug metabolism,
GT_EA606_A_87_P015624	2.60801	0.0121715	NM_001198649	GSTK1	glutathione S-transferase kappa 1	gga00480:Glutathione metabolism,gga00980:Metabolism of xenobiotics by cytochrome P450,gga00982:Drug metabolism,
GT_EA606_A_87_P022622	1.27859	0.0383882	ENSGALT00000013697	GSTO1	glutathione S-transferase omega 1	gga00480:Glutathione metabolism,gga00980:Metabolism of xenobiotics by cytochrome P450,gga00982:Drug metabolism,
GT_EA606_A_87_P318962	1.74885	0.0913418	ENSGALT00000013697	GSTO1	glutathione S-transferase omega 1	gga00480:Glutathione metabolism,gga00980:Metabolism of xenobiotics by cytochrome P450,gga00982:Drug metabolism,
GT_EA606_A_87_P009143	1.53343	0.00588783	NM_205365	GSTT1	glutathione S-transferase theta 1	gga00480:Glutathione metabolism,gga00980:Metabolism of xenobiotics by cytochrome P450,gga00982:Drug metabolism,
GT_EA606_A_87_P246988	1.43784	0.0879302	ENSGALT00000008355	GSTT1	glutathione S-transferase theta 1	gga00480:Glutathione metabolism,gga00980:Metabolism of xenobiotics by cytochrome P450,gga00982:Drug metabolism,
GT_EA606_A_87_P299463	2.81712	0.0584217	NM_205365	GSTT1	glutathione S-transferase theta 1	gga00480:Glutathione metabolism,gga00980:Metabolism of xenobiotics by cytochrome P450,gga00982:Drug metabolism,
GT_EA606_A_87_P144593	1.54846	0.0438145	ENSGALT00000016986	GSTZ1	glutathione transferase zeta 1 (maleylacetoacetate isomerase)	gga00350:Tyrosine metabolism,gga00480:Glutathione metabolism,gga00980:Metabolism of xenobiotics by cytochrome P450,gga00982:Drug metabolism,
GT_EA606_A_87_P109878	1.48284	0.306369	ENSGALT00000026256	GK	glycerol kinase	gga00561:Glycerolipid metabolism,gga03320:PPAR signaling pathway,
GT_EA606_A_87_P081171	1.34394	0.0281051	ENSGALT00000014299	GPAM	glycerol-3-phosphate acyltransferase, mitochondrial	gga00561:Glycerolipid metabolism,gga00564:Glycerophospholipid metabolism,
GT_EA606_A_87_P082966	1.81194	0.0403926	ENSGALT00000019704	GPD1	glycerol-3-phosphate dehydrogenase 1 (soluble)	gga00564:Glycerophospholipid metabolism,
GT_EA606_A_87_P200983	1.4214	0.127972	ENSGALT00000019704	GPD1	glycerol-3-phosphate dehydrogenase 1 (soluble)	gga00564:Glycerophospholipid metabolism,
GT_EA606_A_87_P017551	2.74577	0.0326449	CR354090	GPD1L	glycerol-3-phosphate dehydrogenase 1-like	gga00564:Glycerophospholipid metabolism,
GT_EA606_A_87_P102076	3.10872	0.0497262	ENSGALT00000018718	GPD1L	glycerol-3-phosphate dehydrogenase 1-like	gga00564:Glycerophospholipid metabolism,
GT_EA606_A_87_P037753	3.35981	0.0021907	NM_204745	GATM	glycine amidinotransferase (L-arginine:glycine amidinotransferase)	gga00260:Glycine, serine and threonine metabolism,gga00330:Arginine and proline metabolism,
GT_EA606_A_87_P191193	2.01898	0.0496589	XM_416432	GYS2	glycogen synthase 2 (liver)	gga00500:Starch and sucrose metabolism,gga04910:Insulin signaling pathway,
GT_EA606_A_87_P239558	2.21705	0.00908457	ENSGALT00000012140	GNAS	GNAS complex locus	gga04020:Calcium signaling pathway,gga04270:Vascular smooth muscle contraction,gga04540:Gap junction,gga04912:GnRH signaling pathway,gga04916:Melanogenesis,
GT_EA606_A_87_P280228	1.25728	0.0333188	XM_001231541	GNAS	GNAS complex locus	gga04020:Calcium signaling pathway,gga04270:Vascular smooth muscle contraction,gga04540:Gap junction,gga04912:GnRH signaling pathway,gga04916:Melanogenesis,
GT_EA606_A_87_P037934	1.54203	0.226528	NM_204338	GDF5	growth differentiation factor 5	gga04350:TGF-beta signaling pathway,
GT_EA606_A_87_P091866	1.85044	0.156776	NM_001001293	GHR	growth hormone receptor	gga04060:Cytokine-cytokine receptor interaction,gga04080:Neuroactive ligand-receptor interaction,gga04630:Jak-STAT signaling pathway,
GT_EA606_A_87_P130968	1.78319	0.060803	NM_001001293	GHR	growth hormone receptor	gga04060:Cytokine-cytokine receptor interaction,gga04080:Neuroactive ligand-receptor interaction,gga04630:Jak-STAT signaling pathway,
GT_EA606_A_87_P008690	1.50031	0.00639395	NM_205223	GCH1	GTP cyclohydrolase 1 (dopa-responsive dystonia)	gga00790:Folate biosynthesis,
GT_EA606_A_87_P134443	1.53776	0.0217394	ENSGALT00000019922	GCH1	GTP cyclohydrolase 1 (dopa-responsive dystonia)	gga00790:Folate biosynthesis,
GT_EA606_A_87_P261288	2.14401	0.00394317	NM_205223	GCH1	GTP cyclohydrolase 1 (dopa-responsive dystonia)	gga00790:Folate biosynthesis,
GT_EA606_A_87_P277033	2.18057	0.00338927	NM_205223	GCH1	GTP cyclohydrolase 1 (dopa-responsive dystonia)	gga00790:Folate biosynthesis,
GT_EA606_A_87_P092586	3.4524	0.0180124	ENSGALT00000024432	GDA	guanine deaminase	gga00230:Purine metabolism,
GT_EA606_A_87_P036349	1.66021	0.0481012	NM_001030998	GMPR	guanosine monophosphate reductase	gga00230:Purine metabolism,
GT_EA606_A_87_P094736	3.54801	0.0489747	ENSGALT00000015246	GUCY1B3	guanylate cyclase 1, soluble, beta 3	gga00230:Purine metabolism,gga04270:Vascular smooth muscle contraction,gga04540:Gap junction,
GT_EA606_A_87_P197373	2.89702	0.0575659	NM_205003	HSPA8	heat shock 70kDa protein 8	gga03040:Spliceosome,gga04010:MAPK signaling pathway,gga04144:Endocytosis,
GT_EA606_A_87_P322137	2.11975	0.0324557	NM_205003	HSPA8	heat shock 70kDa protein 8	gga03040:Spliceosome,gga04010:MAPK signaling pathway,gga04144:Endocytosis,
GT_EA606_A_87_P037059	1.13387	0.00106171	NM_001006147	HSPA9	heat shock 70kDa protein 9 (mortalin)	gga03018:RNA degradation,
GT_EA606_A_87_P192348	1.22445	0.00402899	NM_001006147	HSPA9	heat shock 70kDa protein 9 (mortalin)	gga03018:RNA degradation,
GT_EA606_A_87_P276953	1.09685	0.00471679	NM_001006147	HSPA9	heat shock 70kDa protein 9 (mortalin)	gga03018:RNA degradation,
GT_EA606_A_87_P253769	1.85603	0.0450873	NM_001109785	HSP90AA1	heat shock protein 90kDa alpha (cytosolic), class A member 1	gga04621:NOD-like receptor signaling pathway,gga04914:Progesterone-mediated oocyte maturation,
GT_EA606_A_87_P107568	2.15788	0.0210933	NM_204289	HSP90B1	heat shock protein 90kDa beta (Grp94), member 1	gga04621:NOD-like receptor signaling pathway,
GT_EA606_A_87_P094961	2.86318	0.0255808	ENSGALT00000016175	HHIP	hedgehog interacting protein	gga04340:Hedgehog signaling pathway,
GT_EA606_A_87_P008921	2.47712	0.0530064	NM_205344	HMOX1	heme oxygenase (decycling) 1	gga00860:Porphyrin and chlorophyll metabolism,
GT_EA606_A_87_P022671	1.3548	0.038524	BX934256	HS3ST1	heparan sulfate (glucosamine) 3-O-sulfotransferase 1	gga00534:Heparan sulfate biosynthesis,
GT_EA606_A_87_P096506	2.84437	0.0546397	ENSGALT00000024087	HS3ST1	heparan sulfate (glucosamine) 3-O-sulfotransferase 1	gga00534:Heparan sulfate biosynthesis,
GT_EA606_A_87_P237773	2.16413	0.112003	NM_001030390	HEXA	hexosaminidase A (alpha polypeptide)	gga00511:Other glycan degradation,gga00520:Amino sugar and nucleotide sugar metabolism,gga00531:Glycosaminoglycan degradation,gga00603:Glycosphingolipid biosynthesis,gga00604:Glycosphingolipid biosynthesis,gga04142:Lysosome,
GT_EA606_A_87_P024637	3.47809	0.0103036	ENSGALT00000020209	HNMT	histamine N-methyltransferase	gga00340:Histidine metabolism,
GT_EA606_A_87_P192028	1.46831	0.089922	NM_204156	HDAC1	histone deacetylase 1	gga04110:Cell cycle,gga04330:Notch signaling pathway,
GT_EA606_A_87_P109528	1.61936	0.0697273	ENSGALT00000030355	HLCS	holocarboxylase synthetase (biotin-(proprionyl-Coenzyme A-carboxylase (ATP-hydrolysing)) ligase)	gga00780:Biotin metabolism,
GT_EA606_A_87_P023583	2.51318	0.0624286	ENSGALT00000024139	HGD	homogentisate 1,2-dioxygenase (homogentisate oxidase)	gga00350:Tyrosine metabolism,
GT_EA606_A_87_P289728	1.73546	0.00813817	ENSGALT00000024139	HGD	homogentisate 1,2-dioxygenase (homogentisate oxidase)	gga00350:Tyrosine metabolism,
GT_EA606_A_87_P211853	2.23749	0.11309	ENSGALT00000002670	HMMR	hyaluronan-mediated motility receptor (RHAMM)	gga04512:ECM-receptor interaction,
GT_EA606_A_87_P097446	3.07349	0.0608338	ENSGALT00000014374	HAO1	hydroxyacid oxidase (glycolate oxidase) 1	gga00630:Glyoxylate and dicarboxylate metabolism,
GT_EA606_A_87_P174798	2.95493	0.00237609	NM_001199442	HAO1	hydroxyacid oxidase (glycolate oxidase) 1	gga00630:Glyoxylate and dicarboxylate metabolism,
GT_EA606_A_87_P206398	1.43471	0.0222889	ENSGALT00000026714	HADHB	hydroxyacyl-Coenzyme A dehydrogenase/3-ketoacyl-Coenzyme A thiolase/enoyl-Coenzyme A hydratase (trifunctional protein), beta subunit	gga00062:Fatty acid elongation in mitochondria,gga00071:Fatty acid metabolism,gga00280:Valine, leucine and isoleucine degradation,
GT_EA606_A_87_P293971	1.3612	0.00312044	NM_001012789	HAGH	hydroxyacylglutathione hydrolase	gga00620:Pyruvate metabolism,
GT_EA606_A_87_P016647	2.31089	0.191299	CR386199	HSD3B7	hydroxy-delta-5-steroid dehydrogenase, 3 beta- and steroid delta-isomerase 7	gga00120:Primary bile acid biosynthesis,
GT_EA606_A_87_P066201	1.67609	0.0629491	ENSGALT00000002752	HSD3B7	hydroxy-delta-5-steroid dehydrogenase, 3 beta- and steroid delta-isomerase 7	gga00120:Primary bile acid biosynthesis,
GT_EA606_A_87_P012206	1.47481	0.00956614	ENSGALT00000000380	HMBS	hydroxymethylbilane synthase	gga00860:Porphyrin and chlorophyll metabolism,
GT_EA606_A_87_P063656	2.89973	0.0788933	ENSGALT00000002088	HSD11B1	hydroxysteroid (11-beta) dehydrogenase 1	gga00140:Steroid hormone biosynthesis,gga00150:Androgen and estrogen metabolism,
GT_EA606_A_87_P265618	2.89041	0.164757	ENSGALT00000002088	HSD11B1	hydroxysteroid (11-beta) dehydrogenase 1	gga00140:Steroid hormone biosynthesis,gga00150:Androgen and estrogen metabolism,
GT_EA606_A_87_P005649	1.70471	0.182623	XM_414168	HSD17B2	hydroxysteroid (17-beta) dehydrogenase 2	gga00140:Steroid hormone biosynthesis,gga00150:Androgen and estrogen metabolism,
GT_EA606_A_87_P142973	1.61777	0.0365087	NM_001006567	OAT	hypothetical LOC426431; ornithine aminotransferase	gga00330:Arginine and proline metabolism,
GT_EA606_A_87_P258058	1.67306	0.0515832	NM_204848	HPRT1	hypoxanthine phosphoribosyltransferase 1 (Lesch-Nyhan syndrome)	gga00230:Purine metabolism,gga00983:Drug metabolism,
GT_EA606_A_87_P285863	1.3972	0.133548	NM_204297	HIF1A	hypoxia-inducible factor 1, alpha subunit (basic helix-loop-helix transcription factor)	gga04150:mTOR signaling pathway,
GT_EA606_A_87_P023163	1.51229	0.0102442	BX933172	IGSF5	immunoglobulin superfamily, member 5	gga04530:Tight junction,
GT_EA606_A_87_P213823	1.2162	0.0210311	NM_001012588	ITPK1	inositol 1,3,4-triphosphate 5/6 kinase	gga00562:Inositol phosphate metabolism,gga04070:Phosphatidylinositol signaling system,
GT_EA606_A_87_P080006	1.70412	0.209524	ENSGALT00000004276	IPMK	inositol polyphosphate multikinase	gga00562:Inositol phosphate metabolism,
GT_EA606_A_87_P081561	1.9634	0.0571885	ENSGALT00000017087	INPP5A	inositol polyphosphate-5-phosphatase, 40kDa	gga00562:Inositol phosphate metabolism,gga04070:Phosphatidylinositol signaling system,
GT_EA606_A_87_P068626	1.37327	0.0148176	ENSGALT00000003045	INPP5E	inositol polyphosphate-5-phosphatase, 72 kDa	gga00562:Inositol phosphate metabolism,gga04070:Phosphatidylinositol signaling system,
GT_EA606_A_87_P018602	1.4607	0.0249867	ENSGALT00000002444	INPP5B	inositol polyphosphate-5-phosphatase, 75kDa	gga00562:Inositol phosphate metabolism,gga04070:Phosphatidylinositol signaling system,
GT_EA606_A_87_P024283	2.16493	0.0101669	ENSGALT00000025444	IMPA1	inositol(myo)-1(or 4)-monophosphatase 1	gga00562:Inositol phosphate metabolism,gga04070:Phosphatidylinositol signaling system,
GT_EA606_A_87_P201213	2.37841	0.00308637	ENSGALT00000025444	IMPA1	inositol(myo)-1(or 4)-monophosphatase 1	gga00562:Inositol phosphate metabolism,gga04070:Phosphatidylinositol signaling system,
GT_EA606_A_87_P157978	1.39128	0.159416	XM_422037	ITGB6	integrin, beta 6	gga04510:Focal adhesion,gga04512:ECM-receptor interaction,gga04810:Regulation of actin cytoskeleton,
GT_EA606_A_87_P140148	1.62094	0.173752	NM_204571	IL15	interleukin 15	gga04060:Cytokine-cytokine receptor interaction,gga04630:Jak-STAT signaling pathway,gga04672:Intestinal immune network for IgA production,
GT_EA606_A_87_P152478	1.58074	0.0281283	XM_419723	IL20RA	interleukin 20 receptor, alpha	gga04060:Cytokine-cytokine receptor interaction,gga04630:Jak-STAT signaling pathway,
GT_EA606_A_87_P059031	1.79417	0.152122	NM_001080106	IL7R	interleukin 7 receptor	gga04060:Cytokine-cytokine receptor interaction,gga04630:Jak-STAT signaling pathway,
GT_EA606_A_87_P207993	1.45503	0.0393753	ENSGALT00000014003	IQGAP1	IQ motif containing GTPase activating protein 1	gga04810:Regulation of actin cytoskeleton,
GT_EA606_A_87_P203993	2.01259	0.0149835	ENSGALT00000014333	IDH1	isocitrate dehydrogenase 1 (NADP+), soluble	gga00020:Citrate cycle (TCA cycle),gga00480:Glutathione metabolism,
GT_EA606_A_87_P274183	1.32703	0.116547	ENSGALT00000007684	IARS	isoleucyl-tRNA synthetase	gga00290:Valine, leucine and isoleucine biosynthesis,gga00970:Aminoacyl-tRNA biosynthesis,
GT_EA606_A_87_P008782	1.68902	0.0851967	ENSGALT00000014678	JAG1	jagged 1 (Alagille syndrome)	gga04330:Notch signaling pathway,
GT_EA606_A_87_P037906	1.60882	0.00757882	NM_204870	JAK1	Janus kinase 1 (a protein tyrosine kinase)	gga04630:Jak-STAT signaling pathway,
GT_EA606_A_87_P079701	2.05688	0.14647	NM_204870	JAK1	Janus kinase 1 (a protein tyrosine kinase)	gga04630:Jak-STAT signaling pathway,
GT_EA606_A_87_P079706	1.85229	0.100606	NM_204870	JAK1	Janus kinase 1 (a protein tyrosine kinase)	gga04630:Jak-STAT signaling pathway,
GT_EA606_A_87_P036366	1.85708	0.0560837	NM_001006257	JAM2	junctional adhesion molecule 2	gga04514:Cell adhesion molecules (CAMs),gga04530:Tight junction,
GT_EA606_A_87_P008928	1.38069	0.217942	NM_205284	LDHA	lactate dehydrogenase A	gga00010:Glycolysis / Gluconeogenesis,gga00270:Cysteine and methionine metabolism,gga00620:Pyruvate metabolism,gga00640:Propanoate metabolism,
GT_EA606_A_87_P209213	2.6672	0.105194	NM_205284	LDHA	lactate dehydrogenase A	gga00010:Glycolysis / Gluconeogenesis,gga00270:Cysteine and methionine metabolism,gga00620:Pyruvate metabolism,gga00640:Propanoate metabolism,
GT_EA606_A_87_P264678	1.50239	0.162219	NM_205284	LDHA	lactate dehydrogenase A	gga00010:Glycolysis / Gluconeogenesis,gga00270:Cysteine and methionine metabolism,gga00620:Pyruvate metabolism,gga00640:Propanoate metabolism,
GT_EA606_A_87_P266013	1.42065	0.210788	NM_205284	LDHA	lactate dehydrogenase A	gga00010:Glycolysis / Gluconeogenesis,gga00270:Cysteine and methionine metabolism,gga00620:Pyruvate metabolism,gga00640:Propanoate metabolism,
GT_EA606_A_87_P024675	1.71123	0.0028658	NM_204177	LDHB	lactate dehydrogenase B	gga00010:Glycolysis / Gluconeogenesis,gga00270:Cysteine and methionine metabolism,gga00620:Pyruvate metabolism,gga00640:Propanoate metabolism,
GT_EA606_A_87_P256153	2.70017	0.0151489	NM_204177	LDHB	lactate dehydrogenase B	gga00010:Glycolysis / Gluconeogenesis,gga00270:Cysteine and methionine metabolism,gga00620:Pyruvate metabolism,gga00640:Propanoate metabolism,
GT_EA606_A_87_P318332	2.60841	0.0222982	NM_204177	LDHB	lactate dehydrogenase B	gga00010:Glycolysis / Gluconeogenesis,gga00270:Cysteine and methionine metabolism,gga00620:Pyruvate metabolism,gga00640:Propanoate metabolism,
GT_EA606_A_87_P033752	3.81448	0.00689697	ENSGALT00000017577	LGMN	legumain	gga04142:Lysosome,
GT_EA606_A_87_P190073	3.80123	0.0101513	ENSGALT00000017577	LGMN	legumain	gga04142:Lysosome,
GT_EA606_A_87_P299828	2.58389	0.0882187	ENSGALT00000017577	LGMN	legumain	gga04142:Lysosome,
GT_EA606_A_87_P192983	1.93113	0.0598305	NM_001006234	LTA4H	leukotriene A4 hydrolase	gga00590:Arachidonic acid metabolism,
GT_EA606_A_87_P022743	1.68552	0.0227797	ENSGALT00000027059	LIPT1	lipoyltransferase 1	gga00785:Lipoic acid metabolism,
GT_EA606_A_87_P014323	2.37151	0.0166845	CR390177	LRP5	low density lipoprotein receptor-related protein 5; similar to similar to low density lipoprotein receptor-related protein 5; low density lipoprotein receptor-related protein 7; osteoporosis pseudoglioma syndrome	gga04310:Wnt signaling pathway,
GT_EA606_A_87_P025967	2.47506	0.0749483	XM_422014	LRP2	low density lipoprotein-related protein 2	gga04340:Hedgehog signaling pathway,
GT_EA606_A_87_P074006	1.35263	0.0660329	ENSGALT00000033548	LSM3	LSM3 homolog, U6 small nuclear RNA associated (S. cerevisiae)	gga03018:RNA degradation,gga03040:Spliceosome,
GT_EA606_A_87_P017366	1.5721	0.144763	CR354370	LSM5	LSM5 homolog, U6 small nuclear RNA associated (S. cerevisiae)	gga03018:RNA degradation,gga03040:Spliceosome,
GT_EA606_A_87_P102456	1.86011	0.00152404	ENSGALT00000019935	LSM5	LSM5 homolog, U6 small nuclear RNA associated (S. cerevisiae)	gga03018:RNA degradation,gga03040:Spliceosome,
GT_EA606_A_87_P152673	1.20152	0.0224202	XM_420039	TDH	L-threonine dehydrogenase	gga00260:Glycine, serine and threonine metabolism,
GT_EA606_A_87_P147393	1.38077	0.22844	ENSGALT00000025232	LY96	lymphocyte antigen 96	gga04620:Toll-like receptor signaling pathway,
GT_EA606_A_87_P008964	2.35417	0.0123846	NM_205283	LAMP1	lysosomal-associated membrane protein 1	gga04142:Lysosome,
GT_EA606_A_87_P059451	2.99188	0.0139599	NM_205283	LAMP1	lysosomal-associated membrane protein 1	gga04142:Lysosome,
GT_EA606_A_87_P051311	5.41627	0.0235355	NM_001031092	LAPTM4A	lysosomal-associated protein transmembrane 4 alpha	gga04142:Lysosome,
GT_EA606_A_87_P022773	1.69964	0.0239448	ENSGALT00000019519	MAD2L1	MAD2 mitotic arrest deficient-like 1 (yeast)	gga04110:Cell cycle,gga04114:Oocyte meiosis,gga04914:Progesterone-mediated oocyte maturation,
GT_EA606_A_87_P145268	1.70352	0.0352289	DR416156	MAD2L1	MAD2 mitotic arrest deficient-like 1 (yeast)	gga04110:Cell cycle,gga04114:Oocyte meiosis,gga04914:Progesterone-mediated oocyte maturation,
GT_EA606_A_87_P263553	1.40279	0.0302298	NM_001025578	MAD2L2	MAD2 mitotic arrest deficient-like 2 (yeast)	gga04110:Cell cycle,gga04114:Oocyte meiosis,gga04914:Progesterone-mediated oocyte maturation,
GT_EA606_A_87_P248013	1.92859	0.0292915	NM_204325	MAGOH	mago-nashi homolog, proliferation-associated (Drosophila)	gga03040:Spliceosome,
GT_EA606_A_87_P056991	1.31245	0.00218878	NM_001006395	MDH1	malate dehydrogenase 1, NAD (soluble)	gga00020:Citrate cycle (TCA cycle),gga00620:Pyruvate metabolism,gga00630:Glyoxylate and dicarboxylate metabolism,
GT_EA606_A_87_P066251	2.04641	0.0487327	ENSGALT00000003016	MDH2	malate dehydrogenase 2, NAD (mitochondrial)	gga00020:Citrate cycle (TCA cycle),gga00620:Pyruvate metabolism,gga00630:Glyoxylate and dicarboxylate metabolism,
GT_EA606_A_87_P195538	2.51398	0.0639467	ENSGALT00000003016	MDH2	malate dehydrogenase 2, NAD (mitochondrial)	gga00020:Citrate cycle (TCA cycle),gga00620:Pyruvate metabolism,gga00630:Glyoxylate and dicarboxylate metabolism,
GT_EA606_A_87_P007954	1.52945	0.0428409	ENSGALT00000025045	MAN2B2	mannosidase, alpha, class 2B, member 2	gga00511:Other glycan degradation,
GT_EA606_A_87_P277393	2.12221	0.0349293	ENSGALT00000025045	MAN2B2	mannosidase, alpha, class 2B, member 2	gga00511:Other glycan degradation,
GT_EA606_A_87_P281493	1.61841	0.0476032	ENSGALT00000025045	MAN2B2	mannosidase, alpha, class 2B, member 2	gga00511:Other glycan degradation,
GT_EA606_A_87_P095911	1.44678	0.0341533	ENSGALT00000020115	MANBA	mannosidase, beta A, lysosomal	gga00511:Other glycan degradation,gga04142:Lysosome,
GT_EA606_A_87_P235678	1.9427	0.000721888	ENSGALT00000020115	MANBA	mannosidase, beta A, lysosomal	gga00511:Other glycan degradation,gga04142:Lysosome,
GT_EA606_A_87_P271833	2.71652	0.0429997	ENSGALT00000020115	MANBA	mannosidase, beta A, lysosomal	gga00511:Other glycan degradation,gga04142:Lysosome,
GT_EA606_A_87_P200138	1.83633	0.329962	ENSGALT00000019434	MNAT1	menage a trois homolog 1, cyclin H assembly factor (Xenopus laevis)	gga03420:Nucleotide excision repair,
GT_EA606_A_87_P116138	1.495	0.102271	NM_001199519	MAT1A	methionine adenosyltransferase I, alpha	gga00270:Cysteine and methionine metabolism,gga00450:Selenoamino acid metabolism,
GT_EA606_A_87_P022917	1.2818	0.203645	ENSGALT00000034521	MCEE	methylmalonyl CoA epimerase	gga00280:Valine, leucine and isoleucine degradation,gga00640:Propanoate metabolism,
GT_EA606_A_87_P035958	1.20375	0.0628867	NM_001031604	MTAP	methylthioadenosine phosphorylase	gga00270:Cysteine and methionine metabolism,
GT_EA606_A_87_P018713	1.3066	0.012729	NM_001135550	MGST1	microsomal glutathione S-transferase 1	gga00480:Glutathione metabolism,gga00980:Metabolism of xenobiotics by cytochrome P450,gga00982:Drug metabolism,
GT_EA606_A_87_P293418	2.4594	0.0538451	NM_001006527	MCM6	minichromosome maintenance complex component 6	gga03030:DNA replication,gga04110:Cell cycle,
GT_EA606_A_87_P294638	1.39265	0.239853	NM_001006227	MAPK11	mitogen-activated protein kinase 11; hypothetical LOC425466; similar to LOC494669 protein	gga04010:MAPK signaling pathway,gga04370:VEGF signaling pathway,gga04620:Toll-like receptor signaling pathway,gga04621:NOD-like receptor signaling pathway,gga04622:RIG-I-like receptor signaling pathway,gga04912:GnRH signaling pathway,gga04914:Progesterone
GT_EA606_A_87_P067001	1.39089	0.0562031	ENSGALT00000001477	MAP2K4	mitogen-activated protein kinase kinase 4	gga04010:MAPK signaling pathway,gga04012:ErbB signaling pathway,gga04620:Toll-like receptor signaling pathway,gga04912:GnRH signaling pathway,
GT_EA606_A_87_P245133	1.72101	0.0400585	ENSGALT00000001477	MAP2K4	mitogen-activated protein kinase kinase 4	gga04010:MAPK signaling pathway,gga04012:ErbB signaling pathway,gga04620:Toll-like receptor signaling pathway,gga04912:GnRH signaling pathway,
GT_EA606_A_87_P076601	1.45143	0.0440302	ENSGALT00000012856	MAP2K5	mitogen-activated protein kinase kinase 5	gga04010:MAPK signaling pathway,gga04540:Gap junction,
GT_EA606_A_87_P015129	1.21185	0.000133117	CR388943	MGLL	monoglyceride lipase	gga00561:Glycerolipid metabolism,
GT_EA606_A_87_P037838	1.4443	0.00327357	NM_204778	MRE11A	MRE11 meiotic recombination 11 homolog A (S. cerevisiae)	gga03440:Homologous recombination,gga03450:Non-homologous end-joining,
GT_EA606_A_87_P102366	1.72131	0.0251647	ENSGALT00000019702	MLH1	mutL homolog 1, colon cancer, nonpolyposis type 2 (E. coli)	gga03430:Mismatch repair,
GT_EA606_A_87_P003746	1.67108	0.0439465	ENSGALT00000014567	MSH6	mutS homolog 6 (E. coli)	gga03430:Mismatch repair,
GT_EA606_A_87_P222263	2.12503	0.07495	ENSGALT00000014567	MSH6	mutS homolog 6 (E. coli)	gga03430:Mismatch repair,
GT_EA606_A_87_P014479	1.31639	0.0202187	NM_001030962	MYD88	myeloid differentiation primary response gene (88)	gga04210:Apoptosis,gga04620:Toll-like receptor signaling pathway,
GT_EA606_A_87_P009195	2.034	0.212935	NM_204766	MYH15	myosin, heavy polypeptide 6, cardiac muscle, alpha	gga04530:Tight junction,
GT_EA606_A_87_P108978	2.18299	0.279324	NM_204766	MYH15	myosin, heavy polypeptide 6, cardiac muscle, alpha	gga04530:Tight junction,
GT_EA606_A_87_P188603	2.53807	0.214815	NM_204766	MYH15	myosin, heavy polypeptide 6, cardiac muscle, alpha	gga04530:Tight junction,
GT_EA606_A_87_P249823	3.17722	0.14211	NM_204766	MYH15	myosin, heavy polypeptide 6, cardiac muscle, alpha	gga04530:Tight junction,
GT_EA606_A_87_P104038	2.28752	0.0651704	NM_205341	MYL12A	myosin, light chain 12A, regulatory, non-sarcomeric	gga04510:Focal adhesion,gga04530:Tight junction,gga04810:Regulation of actin cytoskeleton,
GT_EA606_A_87_P015616	2.36849	0.293261	ENSGALT00000035085	MYL2	myosin, light chain 2, regulatory, cardiac, slow	gga04510:Focal adhesion,gga04530:Tight junction,gga04810:Regulation of actin cytoskeleton,
GT_EA606_A_87_P058976	1.56356	0.00797229	NM_205459	MYLK	myosin, light chain kinase	gga04020:Calcium signaling pathway,gga04270:Vascular smooth muscle contraction,gga04510:Focal adhesion,gga04810:Regulation of actin cytoskeleton,
GT_EA606_A_87_P082916	2.19487	0.0103176	ENSGALT00000019136	MYLK	myosin, light chain kinase	gga04020:Calcium signaling pathway,gga04270:Vascular smooth muscle contraction,gga04510:Focal adhesion,gga04810:Regulation of actin cytoskeleton,
GT_EA606_A_87_P130918	2.28893	0.0637338	ENSGALT00000019136	MYLK	myosin, light chain kinase	gga04020:Calcium signaling pathway,gga04270:Vascular smooth muscle contraction,gga04510:Focal adhesion,gga04810:Regulation of actin cytoskeleton,
GT_EA606_A_87_P130923	3.13303	0.0209741	ENSGALT00000019136	MYLK	myosin, light chain kinase	gga04020:Calcium signaling pathway,gga04270:Vascular smooth muscle contraction,gga04510:Focal adhesion,gga04810:Regulation of actin cytoskeleton,
GT_EA606_A_87_P131608	1.48142	0.065641	NM_205459	MYLK	myosin, light chain kinase	gga04020:Calcium signaling pathway,gga04270:Vascular smooth muscle contraction,gga04510:Focal adhesion,gga04810:Regulation of actin cytoskeleton,
GT_EA606_A_87_P297403	1.4607	0.0734176	NM_001031560	NPL	N-acetylneuraminate pyruvate lyase (dihydrodipicolinate synthase)	gga00520:Amino sugar and nucleotide sugar metabolism,
GT_EA606_A_87_P054821	1.53695	0.0578146	NM_001007975	NANS	N-acetylneuraminic acid synthase (sialic acid synthase)	gga00520:Amino sugar and nucleotide sugar metabolism,
GT_EA606_A_87_P092966	2.25502	0.168008	NM_001007975	NANS	N-acetylneuraminic acid synthase (sialic acid synthase)	gga00520:Amino sugar and nucleotide sugar metabolism,
GT_EA606_A_87_P058266	1.37467	0.00325821	NM_205526	NAT	N-acetyltransferase, liver isozyme; similar to Arylamine N-acetyltransferase, liver isozyme (Arylamine acetylase)	gga00232:Caffeine metabolism,gga00983:Drug metabolism,
GT_EA606_A_87_P008951	1.91073	0.283057	NM_205340	PNAT10	N-acetyltransferase, pineal gland isozyme NAT-10	gga00232:Caffeine metabolism,gga00983:Drug metabolism,
GT_EA606_A_87_P058246	2.08487	0.286633	NM_205340	PNAT10	N-acetyltransferase, pineal gland isozyme NAT-10	gga00232:Caffeine metabolism,gga00983:Drug metabolism,
GT_EA606_A_87_P036551	1.89118	0.0266808	NM_001006453	ASAH1	N-acylsphingosine amidohydrolase (acid ceramidase) 1	gga00600:Sphingolipid metabolism,gga04142:Lysosome,
GT_EA606_A_87_P002657	1.08387	0.0148465	ENSGALT00000005958	ASAH2	N-acylsphingosine amidohydrolase (non-lysosomal ceramidase) 2	gga00600:Sphingolipid metabolism,
GT_EA606_A_87_P150903	3.01377	0.0800863	ENSGALT00000032336	NSDHL	NAD(P) dependent steroid dehydrogenase-like	gga00100:Steroid biosynthesis,
GT_EA606_A_87_P036220	1.66163	0.0231174	NM_001031247	NDUFA10	NADH dehydrogenase (ubiquinone) 1 alpha subcomplex, 10, 42kDa	gga00190:Oxidative phosphorylation,
GT_EA606_A_87_P192238	1.52404	0.0566051	NM_001031247	NDUFA10	NADH dehydrogenase (ubiquinone) 1 alpha subcomplex, 10, 42kDa	gga00190:Oxidative phosphorylation,
GT_EA606_A_87_P010026	1.20217	0.0780192	CV861736	NDUFA4	NADH dehydrogenase (ubiquinone) 1 alpha subcomplex, 4, 9kDa	gga00190:Oxidative phosphorylation,
GT_EA606_A_87_P101631	1.24931	0.0295926	ENSGALT00000017426	NDUFA4	NADH dehydrogenase (ubiquinone) 1 alpha subcomplex, 4, 9kDa	gga00190:Oxidative phosphorylation,
GT_EA606_A_87_P147953	1.80244	0.0736422	NM_001097637	NDUFA5	NADH dehydrogenase (ubiquinone) 1 alpha subcomplex, 5, 13kDa	gga00190:Oxidative phosphorylation,
GT_EA606_A_87_P036027	2.11411	0.0115033	NM_001006281	NDUFA9	NADH dehydrogenase (ubiquinone) 1 alpha subcomplex, 9, 39kDa	gga00190:Oxidative phosphorylation,
GT_EA606_A_87_P191273	2.38161	0.021105	NM_001006281	NDUFA9	NADH dehydrogenase (ubiquinone) 1 alpha subcomplex, 9, 39kDa	gga00190:Oxidative phosphorylation,
GT_EA606_A_87_P247878	1.34675	0.0147604	NM_001006281	NDUFA9	NADH dehydrogenase (ubiquinone) 1 alpha subcomplex, 9, 39kDa	gga00190:Oxidative phosphorylation,
GT_EA606_A_87_P261603	3.1423	0.0202354	NM_001006281	NDUFA9	NADH dehydrogenase (ubiquinone) 1 alpha subcomplex, 9, 39kDa	gga00190:Oxidative phosphorylation,
GT_EA606_A_87_P050206	2.05795	0.0191271	NM_001006502	NDUFB8	NADH dehydrogenase (ubiquinone) 1 beta subcomplex, 8, 19kDa	gga00190:Oxidative phosphorylation,
GT_EA606_A_87_P325122	2.09853	0.508198	CO765856	NDUFAB1	NADH dehydrogenase (ubiquinone) 1, alpha/beta subcomplex, 1, 8kDa	gga00190:Oxidative phosphorylation,
GT_EA606_A_87_P055106	1.51488	0.081495	NM_001006518	NDUFS1	NADH dehydrogenase (ubiquinone) Fe-S protein 1, 75kDa (NADH-coenzyme Q reductase)	gga00190:Oxidative phosphorylation,
GT_EA606_A_87_P278343	1.67192	0.0117188	NM_001006518	NDUFS1	NADH dehydrogenase (ubiquinone) Fe-S protein 1, 75kDa (NADH-coenzyme Q reductase)	gga00190:Oxidative phosphorylation,
GT_EA606_A_87_P199438	1.69479	0.0217476	NM_001146332	NDUFS3	NADH dehydrogenase (ubiquinone) Fe-S protein 3, 30kDa (NADH-coenzyme Q reductase)	gga00190:Oxidative phosphorylation,
GT_EA606_A_87_P029713	1.38876	0.0211726	NM_001199170	NDUFV3	NADH dehydrogenase (ubiquinone) flavoprotein 3, 10kDa	gga00190:Oxidative phosphorylation,
GT_EA606_A_87_P010369	1.42775	0.0224969	ENSGALT00000004344	NCKAP1	NCK-associated protein 1	gga04810:Regulation of actin cytoskeleton,
GT_EA606_A_87_P063781	1.5063	0.0934631	NM_001012549	NRAS	neuroblastoma RAS viral (v-ras) oncogene homolog	gga04010:MAPK signaling pathway,gga04012:ErbB signaling pathway,gga04370:VEGF signaling pathway,gga04530:Tight junction,gga04540:Gap junction,gga04650:Natural killer cell mediated cytotoxicity,gga04810:Regulation of actin cytoskeleton,gga04910:Insulin sig
GT_EA606_A_87_P257318	1.66789	0.0141808	NM_001012549	NRAS	neuroblastoma RAS viral (v-ras) oncogene homolog	gga04010:MAPK signaling pathway,gga04012:ErbB signaling pathway,gga04370:VEGF signaling pathway,gga04530:Tight junction,gga04540:Gap junction,gga04650:Natural killer cell mediated cytotoxicity,gga04810:Regulation of actin cytoskeleton,gga04910:Insulin sig
GT_EA606_A_87_P009244	2.40754	0.0742483	NM_001031128	NPY2R	neuropeptide Y receptor Y2	gga04080:Neuroactive ligand-receptor interaction,
GT_EA606_A_87_P105908	1.51165	0.063051	ENSGALT00000039492	NAMPT	nicotinamide phosphoribosyltransferase	gga00760:Nicotinate and nicotinamide metabolism,
GT_EA606_A_87_P197013	1.19949	0.0182303	ENSGALT00000024240	NPC1	Niemann-Pick disease, type C1	gga04142:Lysosome,
GT_EA606_A_87_P224203	1.42232	0.00356079	ENSGALT00000012045	MPG	N-methylpurine-DNA glycosylase	gga03410:Base excision repair,
GT_EA606_A_87_P036698	1.32209	0.0119388	NM_001006430	NCBP2	nuclear cap binding protein subunit 2, 20kDa	gga03040:Spliceosome,
GT_EA606_A_87_P147988	2.2511	0.0541837	NM_001006430	NCBP2	nuclear cap binding protein subunit 2, 20kDa	gga03040:Spliceosome,
GT_EA606_A_87_P091561	2.06281	0.152184	ENSGALT00000009330	NUDT2	nudix (nucleoside diphosphate linked moiety X)-type motif 2	gga00230:Purine metabolism,gga00240:Pyrimidine metabolism,
GT_EA606_A_87_P037950	2.09726	0.332148	NM_204910	OTC	ornithine carbamoyltransferase	gga00330:Arginine and proline metabolism,
GT_EA606_A_87_P072626	1.88748	0.11159	ENSGALT00000041136	PANK3	pantothenate kinase 3	gga00770:Pantothenate and CoA biosynthesis,
GT_EA606_A_87_P013933	1.65189	0.0477056	ENSGALT00000008731	PARVA	parvin, alpha	gga04510:Focal adhesion,
GT_EA606_A_87_P165193	1.85867	0.0373741	XM_416459	PARVB	parvin, beta	gga04510:Focal adhesion,
GT_EA606_A_87_P021564	2.65128	0.00886664	NM_001001298	PAH	phenylalanine hydroxylase	gga00360:Phenylalanine metabolism,gga00400:Phenylalanine, tyrosine and tryptophan biosynthesis,
GT_EA606_A_87_P017358	1.56446	0.187223	ENSGALT00000038837	PPAP2A	phosphatidic acid phosphatase type 2A	gga00561:Glycerolipid metabolism,gga00564:Glycerophospholipid metabolism,gga00565:Ether lipid metabolism,gga00600:Sphingolipid metabolism,
GT_EA606_A_87_P182088	2.04957	0.0106498	ENSGALT00000002108	PI4KA	phosphatidylinositol 4-kinase, catalytic, alpha	gga00562:Inositol phosphate metabolism,gga04070:Phosphatidylinositol signaling system,
GT_EA606_A_87_P056626	2.03975	0.0401755	NM_001031522	PIGM	phosphatidylinositol glycan anchor biosynthesis, class M	gga00563:Glycosylphosphatidylinositol(GPI)-anchor biosynthesis,
GT_EA606_A_87_P057121	1.31306	0.223455	NM_001031422	PIP5K1B	phosphatidylinositol-4-phosphate 5-kinase, type I, beta	gga00562:Inositol phosphate metabolism,gga04070:Phosphatidylinositol signaling system,gga04144:Endocytosis,gga04810:Regulation of actin cytoskeleton,
GT_EA606_A_87_P077601	1.72553	0.0493146	ENSGALT00000033254	PDE6D	phosphodiesterase 6D, cGMP-specific, rod, delta	gga00230:Purine metabolism,
GT_EA606_A_87_P036272	1.72028	0.00961351	NM_001006303	PGD	phosphogluconate dehydrogenase	gga00030:Pentose phosphate pathway,gga00480:Glutathione metabolism,
GT_EA606_A_87_P231333	1.70448	0.0125979	NM_001006303	PGD	phosphogluconate dehydrogenase	gga00030:Pentose phosphate pathway,gga00480:Glutathione metabolism,
GT_EA606_A_87_P287423	2.00241	0.0718226	NM_001006303	PGD	phosphogluconate dehydrogenase	gga00030:Pentose phosphate pathway,gga00480:Glutathione metabolism,
GT_EA606_A_87_P009466	2.11358	0.047352	NM_204985	PGK1	phosphoglycerate kinase 1	gga00010:Glycolysis / Gluconeogenesis,
GT_EA606_A_87_P236123	3.04742	0.0866544	NM_204985	PGK1	phosphoglycerate kinase 1	gga00010:Glycolysis / Gluconeogenesis,
GT_EA606_A_87_P256723	3.1979	0.086075	NM_204985	PGK1	phosphoglycerate kinase 1	gga00010:Glycolysis / Gluconeogenesis,
GT_EA606_A_87_P099256	4.41202	0.124295	NM_205410	PLN	phospholamban	gga04020:Calcium signaling pathway,
GT_EA606_A_87_P026183	3.3949	0.0695384	XM_421584	PLA2G12B	phospholipase A2, group XIIB	gga00564:Glycerophospholipid metabolism,gga00565:Ether lipid metabolism,gga00590:Arachidonic acid metabolism,gga00591:Linoleic acid metabolism,gga00592:alpha-Linolenic acid metabolism,gga04010:MAPK signaling pathway,gga04270:Vascular smooth muscle contrac
GT_EA606_A_87_P080261	4.11175	0.027129	ENSGALT00000006906	PLA2G12B	phospholipase A2, group XIIB	gga00564:Glycerophospholipid metabolism,gga00565:Ether lipid metabolism,gga00590:Arachidonic acid metabolism,gga00591:Linoleic acid metabolism,gga00592:alpha-Linolenic acid metabolism,gga04010:MAPK signaling pathway,gga04270:Vascular smooth muscle contrac
GT_EA606_A_87_P159343	3.23409	0.0203696	XM_421584	PLA2G12B	phospholipase A2, group XIIB	gga00564:Glycerophospholipid metabolism,gga00565:Ether lipid metabolism,gga00590:Arachidonic acid metabolism,gga00591:Linoleic acid metabolism,gga00592:alpha-Linolenic acid metabolism,gga04010:MAPK signaling pathway,gga04270:Vascular smooth muscle contrac
GT_EA606_A_87_P009325	1.99184	0.00142423	NM_001004401	PPAT	phosphoribosyl pyrophosphate amidotransferase	gga00230:Purine metabolism,gga00250:Alanine, aspartate and glutamate metabolism,
GT_EA606_A_87_P129348	2.39262	0.00241407	NM_001004401	PPAT	phosphoribosyl pyrophosphate amidotransferase	gga00230:Purine metabolism,gga00250:Alanine, aspartate and glutamate metabolism,
GT_EA606_A_87_P287853	1.62539	0.00694017	NM_001004401	PPAT	phosphoribosyl pyrophosphate amidotransferase	gga00230:Purine metabolism,gga00250:Alanine, aspartate and glutamate metabolism,
GT_EA606_A_87_P012202	1.04922	0.113232	ENSGALT00000007851	PRPS1	phosphoribosyl pyrophosphate synthetase 1	gga00030:Pentose phosphate pathway,gga00230:Purine metabolism,
GT_EA606_A_87_P017474	2.8193	0.00401109	NM_001006264	PRPS2	phosphoribosyl pyrophosphate synthetase 2	gga00030:Pentose phosphate pathway,gga00230:Purine metabolism,
GT_EA606_A_87_P058071	1.15857	0.00933017	NM_205524	PAICS	phosphoribosylaminoimidazole carboxylase, phosphoribosylaminoimidazole succinocarboxamide synthetase	gga00230:Purine metabolism,
GT_EA606_A_87_P140123	2.7745	0.0440829	NM_205524	PAICS	phosphoribosylaminoimidazole carboxylase, phosphoribosylaminoimidazole succinocarboxamide synthetase	gga00230:Purine metabolism,
GT_EA606_A_87_P008927	1.99593	0.0343826	NM_001001469	GART	phosphoribosylglycinamide formyltransferase, phosphoribosylglycinamide synthetase, phosphoribosylaminoimidazole synthetase	gga00230:Purine metabolism,gga00670:One carbon pool by folate,
GT_EA606_A_87_P109438	1.3677	0.18075	NM_001001469	GART	phosphoribosylglycinamide formyltransferase, phosphoribosylglycinamide synthetase, phosphoribosylaminoimidazole synthetase	gga00230:Purine metabolism,gga00670:One carbon pool by folate,
GT_EA606_A_87_P122953	1.26414	0.0163929	NM_001001469	GART	phosphoribosylglycinamide formyltransferase, phosphoribosylglycinamide synthetase, phosphoribosylaminoimidazole synthetase	gga00230:Purine metabolism,gga00670:One carbon pool by folate,
GT_EA606_A_87_P092646	2.26301	0.0858566	ENSGALT00000024496	PSAT1	phosphoserine aminotransferase 1	gga00260:Glycine, serine and threonine metabolism,gga00750:Vitamin B6 metabolism,
GT_EA606_A_87_P023593	1.41626	0.00272808	ENSGALT00000002291	PTTG1	pituitary tumor-transforming 1	gga04110:Cell cycle,gga04114:Oocyte meiosis,
GT_EA606_A_87_P210583	1.42068	0.00342984	ENSGALT00000002291	PTTG1	pituitary tumor-transforming 1	gga04110:Cell cycle,gga04114:Oocyte meiosis,
GT_EA606_A_87_P034141	2.34613	0.00332904	ENSGALT00000006829	PLG	plasminogen	gga04080:Neuroactive ligand-receptor interaction,
GT_EA606_A_87_P022270	2.03281	0.0672391	ENSGALT00000030073	PDGFD	platelet derived growth factor D	gga04510:Focal adhesion,gga04540:Gap junction,gga04810:Regulation of actin cytoskeleton,
GT_EA606_A_87_P222913	1.18122	9.00467e-06	NM_204324	PAFAH1B1	platelet-activating factor acetylhydrolase, isoform Ib, alpha subunit 45kDa	gga00565:Ether lipid metabolism,
GT_EA606_A_87_P272318	1.29448	0.106912	NM_204324	PAFAH1B1	platelet-activating factor acetylhydrolase, isoform Ib, alpha subunit 45kDa	gga00565:Ether lipid metabolism,
GT_EA606_A_87_P016591	1.19932	0.004364	ENSGALT00000015067	PLRG1	pleiotropic regulator 1 (PRL1 homolog, Arabidopsis)	gga03040:Spliceosome,
GT_EA606_A_87_P036300	2.05558	0.0472713	NM_001030639	PLK1	polo-like kinase 1 (Drosophila)	gga04110:Cell cycle,gga04114:Oocyte meiosis,gga04914:Progesterone-mediated oocyte maturation,
GT_EA606_A_87_P056951	1.16554	0.0411624	NM_205263	PARP1	poly (ADP-ribose) polymerase family, member 1	gga03410:Base excision repair,
GT_EA606_A_87_P036694	2.75313	0.0410225	NM_001006493	POLE2	polymerase (DNA directed), epsilon 2 (p59 subunit)	gga00230:Purine metabolism,gga00240:Pyrimidine metabolism,gga03030:DNA replication,gga03410:Base excision repair,gga03420:Nucleotide excision repair,
GT_EA606_A_87_P022720	1.19267	0.0582266	ENSGALT00000016848	POLR1C	polymerase (RNA) I polypeptide C, 30kDa	gga00230:Purine metabolism,gga00240:Pyrimidine metabolism,gga03020:RNA polymerase,gga04623:Cytosolic DNA-sensing pathway,
GT_EA606_A_87_P023159	1.4944	0.0611049	ENSGALT00000013907	POLR2H	polymerase (RNA) II (DNA directed) polypeptide H	gga00230:Purine metabolism,gga00240:Pyrimidine metabolism,gga03020:RNA polymerase,
GT_EA606_A_87_P104958	1.50823	0.0239654	ENSGALT00000030825	POLR2K	polymerase (RNA) II (DNA directed) polypeptide K, 7.0kDa	gga00230:Purine metabolism,gga00240:Pyrimidine metabolism,gga03020:RNA polymerase,
GT_EA606_A_87_P037929	1.5889	0.0566229	NM_204602	KCNMB1	potassium large conductance calcium-activated channel, subfamily M, beta member 1	gga04270:Vascular smooth muscle contraction,
GT_EA606_A_87_P261623	1.88918	0.017108	NM_204602	KCNMB1	potassium large conductance calcium-activated channel, subfamily M, beta member 1	gga04270:Vascular smooth muscle contraction,
GT_EA606_A_87_P077791	2.06149	0.170569	ENSGALT00000028163	KCNMB2	potassium large conductance calcium-activated channel, subfamily M, beta member 2	gga04270:Vascular smooth muscle contraction,
GT_EA606_A_87_P247658	1.64034	0.0786039	ENSGALT00000012224	PDSS1	prenyl (decaprenyl) diphosphate synthase, subunit 1	gga00900:Terpenoid backbone biosynthesis,
GT_EA606_A_87_P058896	1.84766	0.117435	NM_204163	PSEN1	presenilin 1 (Alzheimer disease 3)	gga04310:Wnt signaling pathway,gga04330:Notch signaling pathway,
GT_EA606_A_87_P024670	1.64194	0.0896084	NM_204302	PSEN2	presenilin 2 (Alzheimer disease 4)	gga04330:Notch signaling pathway,
GT_EA606_A_87_P099896	1.3981	0.0108437	NM_001012880	PRIM2	primase, DNA, polypeptide 2 (58kDa)	gga00230:Purine metabolism,gga00240:Pyrimidine metabolism,gga03030:DNA replication,
GT_EA606_A_87_P053181	2.24294	0.0498631	NM_204170	PCNA	proliferating cell nuclear antigen	gga03030:DNA replication,gga03410:Base excision repair,gga03420:Nucleotide excision repair,gga03430:Mismatch repair,gga04110:Cell cycle,
GT_EA606_A_87_P229303	2.73844	0.0431742	NM_204170	PCNA	proliferating cell nuclear antigen	gga03030:DNA replication,gga03410:Base excision repair,gga03420:Nucleotide excision repair,gga03430:Mismatch repair,gga04110:Cell cycle,
GT_EA606_A_87_P200878	1.5225	0.0550833	ENSGALT00000010797	P4HA2	prolyl 4-hydroxylase, alpha polypeptide II	gga00330:Arginine and proline metabolism,
GT_EA606_A_87_P234993	1.53863	0.0153325	NM_204811	PSAP	prosaposin	gga04142:Lysosome,
GT_EA606_A_87_P300848	1.75386	0.059935	NM_204811	PSAP	prosaposin	gga04142:Lysosome,
GT_EA606_A_87_P114118	1.48218	0.063054	BX931167	PTGFR	prostaglandin F receptor (FP)	gga04020:Calcium signaling pathway,gga04080:Neuroactive ligand-receptor interaction,
GT_EA606_A_87_P058851	1.38273	0.107376	NM_205011	HPGDS	prostaglandin-D synthase	gga00590:Arachidonic acid metabolism,
GT_EA606_A_87_P218418	1.44913	0.00820317	NM_204958	PSMC1	proteasome (prosome, macropain) 26S subunit, ATPase, 1	gga03050:Proteasome,
GT_EA606_A_87_P124798	1.24213	0.0286849	NM_001031190	PSMC3	proteasome (prosome, macropain) 26S subunit, ATPase, 3	gga03050:Proteasome,
GT_EA606_A_87_P208868	1.58442	0.00321788	NM_001031190	PSMC3	proteasome (prosome, macropain) 26S subunit, ATPase, 3	gga03050:Proteasome,
GT_EA606_A_87_P035743	1.09941	0.00882224	NM_001012600	PSMD1	proteasome (prosome, macropain) 26S subunit, non-ATPase, 1	gga03050:Proteasome,
GT_EA606_A_87_P023585	2.42517	0.120545	ENSGALT00000011836	PSMD6	proteasome (prosome, macropain) 26S subunit, non-ATPase, 6	gga03050:Proteasome,
GT_EA606_A_87_P289743	1.56225	0.0208994	NM_001012550	PSME3	proteasome (prosome, macropain) activator subunit 3 (PA28 gamma; Ki)	gga03050:Proteasome,
GT_EA606_A_87_P300968	1.20301	0.1848	NM_001012550	PSME3	proteasome (prosome, macropain) activator subunit 3 (PA28 gamma; Ki)	gga03050:Proteasome,
GT_EA606_A_87_P319017	1.33365	0.0281524	NM_001012550	PSME3	proteasome (prosome, macropain) activator subunit 3 (PA28 gamma; Ki)	gga03050:Proteasome,
GT_EA606_A_87_P022758	1.14488	0.0118071	NM_205020	PSMA1	proteasome (prosome, macropain) subunit, alpha type, 1	gga03050:Proteasome,
GT_EA606_A_87_P102631	1.42361	0.0144684	NM_001012860	PSMA2	proteasome (prosome, macropain) subunit, alpha type, 2	gga03050:Proteasome,
GT_EA606_A_87_P194128	1.60035	0.0032621	NM_001012860	PSMA2	proteasome (prosome, macropain) subunit, alpha type, 2	gga03050:Proteasome,
GT_EA606_A_87_P285663	2.00787	0.0149065	NM_001012860	PSMA2	proteasome (prosome, macropain) subunit, alpha type, 2	gga03050:Proteasome,
GT_EA606_A_87_P150298	2.29477	0.0205265	NM_001006491	PSMA3	proteasome (prosome, macropain) subunit, alpha type, 3	gga03050:Proteasome,
GT_EA606_A_87_P292218	1.35258	0.0421156	NM_001198602	PSMA4	proteasome (prosome, macropain) subunit, alpha type, 4	gga03050:Proteasome,
GT_EA606_A_87_P036499	1.29856	0.00169229	NM_001031407	PSMA5	proteasome (prosome, macropain) subunit, alpha type, 5	gga03050:Proteasome,
GT_EA606_A_87_P056281	1.54997	0.0106894	NM_001031407	PSMA5	proteasome (prosome, macropain) subunit, alpha type, 5	gga03050:Proteasome,
GT_EA606_A_87_P014357	1.67385	0.00291936	ENSGALT00000016353	PSMA6	proteasome (prosome, macropain) subunit, alpha type, 6	gga03050:Proteasome,
GT_EA606_A_87_P022526	2.45509	0.0127329	NM_001007905	PSMB1	proteasome (prosome, macropain) subunit, beta type, 1	gga03050:Proteasome,
GT_EA606_A_87_P024133	1.05009	0.00195463	ENSGALT00000003740	PSMB2	proteasome (prosome, macropain) subunit, beta type, 2	gga03050:Proteasome,
GT_EA606_A_87_P024211	1.37294	0.0184351	ENSGALT00000002423	PSMB3	proteasome (prosome, macropain) subunit, beta type, 3	gga03050:Proteasome,
GT_EA606_A_87_P038101	1.86795	0.00865488	NM_204397	PSMB7	proteasome (prosome, macropain) subunit, beta type, 7	gga03050:Proteasome,
GT_EA606_A_87_P256563	1.04757	0.164279	NM_001006133	PRKCD	protein kinase C, delta	gga04270:Vascular smooth muscle contraction,gga04530:Tight junction,
GT_EA606_A_87_P056481	1.22866	0.0921033	NM_001039603	PRKAA1	protein kinase, AMP-activated, alpha 1 catalytic subunit	gga04140:Regulation of autophagy,gga04150:mTOR signaling pathway,gga04910:Insulin signaling pathway,gga04920:Adipocytokine signaling pathway,
GT_EA606_A_87_P078411	2.19481	0.00825258	NM_001044662	PRKAB2	protein kinase, AMP-activated, beta 2 non-catalytic subunit; similar to protein kinase, AMP-activated, beta 2 non-catalytic subunit	gga04910:Insulin signaling pathway,gga04920:Adipocytokine signaling pathway,
GT_EA606_A_87_P009681	1.21694	0.0272535	NM_001030965	PRKAG2	protein kinase, AMP-activated, gamma 2 non-catalytic subunit	gga04910:Insulin signaling pathway,gga04920:Adipocytokine signaling pathway,
GT_EA606_A_87_P188598	2.69891	0.101475	NM_001030965	PRKAG2	protein kinase, AMP-activated, gamma 2 non-catalytic subunit	gga04910:Insulin signaling pathway,gga04920:Adipocytokine signaling pathway,
GT_EA606_A_87_P054586	1.19413	6.23691e-05	NM_001007845	PRKAR1A	protein kinase, cAMP-dependent, regulatory, type I, alpha (tissue specific extinguisher 1)	gga04210:Apoptosis,gga04910:Insulin signaling pathway,
GT_EA606_A_87_P009784	1.82339	0.0373157	NM_205122	PPP1CB	protein phosphatase 1, catalytic subunit, beta isoform	gga04114:Oocyte meiosis,gga04270:Vascular smooth muscle contraction,gga04510:Focal adhesion,gga04810:Regulation of actin cytoskeleton,gga04910:Insulin signaling pathway,
GT_EA606_A_87_P275678	2.37597	0.0232569	NM_205122	PPP1CB	protein phosphatase 1, catalytic subunit, beta isoform	gga04114:Oocyte meiosis,gga04270:Vascular smooth muscle contraction,gga04510:Focal adhesion,gga04810:Regulation of actin cytoskeleton,gga04910:Insulin signaling pathway,
GT_EA606_A_87_P163723	1.12203	0.0269883	ENSGALT00000019443	PPM1A	protein phosphatase 1A (formerly 2C), magnesium-dependent, alpha isoform	gga04010:MAPK signaling pathway,
GT_EA606_A_87_P294593	1.80412	0.082021	NM_001006152	PPP2CA	protein phosphatase 2 (formerly 2A), catalytic subunit, alpha isoform; similar to protein phosphatase 2 (formerly 2A), catalytic subunit, alpha isoform	gga04114:Oocyte meiosis,gga04310:Wnt signaling pathway,gga04350:TGF-beta signaling pathway,gga04530:Tight junction,
GT_EA606_A_87_P097826	1.18732	0.0307399	ENSGALT00000015980	PPP2R5A	protein phosphatase 2, regulatory subunit B', alpha isoform	gga04114:Oocyte meiosis,gga04310:Wnt signaling pathway,
GT_EA606_A_87_P035587	1.38674	0.0475815	NM_001079482	PPP2R5C	protein phosphatase 2, regulatory subunit B', gamma isoform	gga04114:Oocyte meiosis,gga04310:Wnt signaling pathway,
GT_EA606_A_87_P188953	1.56234	0.0300488	NM_001079482	PPP2R5C	protein phosphatase 2, regulatory subunit B', gamma isoform	gga04114:Oocyte meiosis,gga04310:Wnt signaling pathway,
GT_EA606_A_87_P125643	2.24323	0.202486	ENSGALT00000014249	PPP3R1	protein phosphatase 3 (formerly 2B), regulatory subunit B, alpha isoform	gga04010:MAPK signaling pathway,gga04020:Calcium signaling pathway,gga04114:Oocyte meiosis,gga04210:Apoptosis,gga04310:Wnt signaling pathway,gga04370:VEGF signaling pathway,gga04650:Natural killer cell mediated cytotoxicity,
GT_EA606_A_87_P133138	2.26535	0.181414	NM_204376	PPP3R1	protein phosphatase 3 (formerly 2B), regulatory subunit B, alpha isoform	gga04010:MAPK signaling pathway,gga04020:Calcium signaling pathway,gga04114:Oocyte meiosis,gga04210:Apoptosis,gga04310:Wnt signaling pathway,gga04370:VEGF signaling pathway,gga04650:Natural killer cell mediated cytotoxicity,
GT_EA606_A_87_P016149	1.99689	0.188617	CR386940	PTPLA	protein tyrosine phosphatase-like (proline instead of catalytic arginine), member A	gga01040:Biosynthesis of unsaturated fatty acids,
GT_EA606_A_87_P057136	1.49629	0.104201	NM_001030685	POMT1	protein-O-mannosyltransferase 1	gga00514:O-Mannosyl glycan biosynthesis,
GT_EA606_A_87_P037061	1.93801	0.17824	NM_001039331	PRPF19	PRP19/PSO4 pre-mRNA processing factor 19 homolog (S. cerevisiae)	gga03040:Spliceosome,gga04120:Ubiquitin mediated proteolysis,
GT_EA606_A_87_P303568	1.98022	0.142958	NM_001039331	PRPF19	PRP19/PSO4 pre-mRNA processing factor 19 homolog (S. cerevisiae)	gga03040:Spliceosome,gga04120:Ubiquitin mediated proteolysis,
GT_EA606_A_87_P070566	1.09876	0.0804596	ENSGALT00000009656	PRPF6	PRP6 pre-mRNA processing factor 6 homolog (S. cerevisiae)	gga03040:Spliceosome,
GT_EA606_A_87_P146708	2.1504	0.0199212	ENSGALT00000007067	PPA1	pyrophosphatase (inorganic) 1	gga00190:Oxidative phosphorylation,
GT_EA606_A_87_P300398	2.37506	0.0286259	ENSGALT00000007067	PPA1	pyrophosphatase (inorganic) 1	gga00190:Oxidative phosphorylation,
GT_EA606_A_87_P017364	1.33592	0.0514132	ENSGALT00000017222	PPA2	pyrophosphatase (inorganic) 2	gga00190:Oxidative phosphorylation,
GT_EA606_A_87_P035749	3.11572	0.108294	NM_001012544	PDHA1	pyruvate dehydrogenase (lipoamide) alpha 1	gga00010:Glycolysis / Gluconeogenesis,gga00020:Citrate cycle (TCA cycle),gga00290:Valine, leucine and isoleucine biosynthesis,gga00620:Pyruvate metabolism,gga00650:Butanoate metabolism,
GT_EA606_A_87_P295543	1.20209	0.000789543	NM_001012544	PDHA1	pyruvate dehydrogenase (lipoamide) alpha 1	gga00010:Glycolysis / Gluconeogenesis,gga00020:Citrate cycle (TCA cycle),gga00290:Valine, leucine and isoleucine biosynthesis,gga00620:Pyruvate metabolism,gga00650:Butanoate metabolism,
GT_EA606_A_87_P024669	1.68312	0.0020079	NM_001198620	PDHB	pyruvate dehydrogenase (lipoamide) beta	gga00010:Glycolysis / Gluconeogenesis,gga00020:Citrate cycle (TCA cycle),gga00290:Valine, leucine and isoleucine biosynthesis,gga00620:Pyruvate metabolism,gga00650:Butanoate metabolism,
GT_EA606_A_87_P074116	1.75742	0.00435448	NM_001198620	PDHB	pyruvate dehydrogenase (lipoamide) beta	gga00010:Glycolysis / Gluconeogenesis,gga00020:Citrate cycle (TCA cycle),gga00290:Valine, leucine and isoleucine biosynthesis,gga00620:Pyruvate metabolism,gga00650:Butanoate metabolism,
GT_EA606_A_87_P232043	1.84514	0.00833817	NM_001005827	RAB11A	RAB11A, member RAS oncogene family	gga04144:Endocytosis,
GT_EA606_A_87_P035674	1.35026	0.0560249	NM_001012551	RAB11B	RAB11B, member RAS oncogene family	gga04144:Endocytosis,
GT_EA606_A_87_P022528	1.59813	0.0890115	BX934582	RAB3B	RAB3B, member RAS oncogene family	gga04530:Tight junction,
GT_EA606_A_87_P079416	2.21056	0.0634225	ENSGALT00000017197	RAB3B	RAB3B, member RAS oncogene family	gga04530:Tight junction,
GT_EA606_A_87_P218608	2.1363	0.0852397	ENSGALT00000018060	RAB4A	RAB4A, member RAS oncogene family	gga04144:Endocytosis,
GT_EA606_A_87_P190998	1.83925	0.0701821	NM_001007852	RAP1B	RAP1B, member of RAS oncogene family	gga04010:MAPK signaling pathway,gga04510:Focal adhesion,
GT_EA606_A_87_P196733	1.95853	0.0150617	NM_001007852	RAP1B	RAP1B, member of RAS oncogene family	gga04010:MAPK signaling pathway,gga04510:Focal adhesion,
GT_EA606_A_87_P249213	1.4548	0.0781597	NM_001007852	RAP1B	RAP1B, member of RAS oncogene family	gga04010:MAPK signaling pathway,gga04510:Focal adhesion,
GT_EA606_A_87_P073631	2.21742	0.0554743	NM_204704	RHOA	ras homolog gene family, member A	gga04270:Vascular smooth muscle contraction,gga04310:Wnt signaling pathway,gga04350:TGF-beta signaling pathway,gga04510:Focal adhesion,gga04520:Adherens junction,gga04530:Tight junction,gga04810:Regulation of actin cytoskeleton,
GT_EA606_A_87_P073636	2.13586	0.0398952	NM_204704	RHOA	ras homolog gene family, member A	gga04270:Vascular smooth muscle contraction,gga04310:Wnt signaling pathway,gga04350:TGF-beta signaling pathway,gga04510:Focal adhesion,gga04520:Adherens junction,gga04530:Tight junction,gga04810:Regulation of actin cytoskeleton,
GT_EA606_A_87_P037659	1.37978	0.0283228	NM_204461	RHOQ	ras homolog gene family, member Q	gga04910:Insulin signaling pathway,
GT_EA606_A_87_P102701	2.20795	0.143858	ENSGALT00000020298	RAMP3	receptor (G protein-coupled) activity modifying protein 3	gga04270:Vascular smooth muscle contraction,
GT_EA606_A_87_P038086	1.75184	0.101406	NM_204402	RIPK1	receptor (TNFRSF)-interacting serine-threonine kinase 1	gga04210:Apoptosis,gga04620:Toll-like receptor signaling pathway,gga04622:RIG-I-like receptor signaling pathway,gga04623:Cytosolic DNA-sensing pathway,
GT_EA606_A_87_P105853	1.76724	0.00276346	ENSGALT00000013344	RELN	reelin	gga04510:Focal adhesion,gga04512:ECM-receptor interaction,
GT_EA606_A_87_P009147	1.56281	0.00710902	NM_205530	RFC2	replication factor C (activator 1) 2, 40kDa	gga03030:DNA replication,gga03420:Nucleotide excision repair,gga03430:Mismatch repair,
GT_EA606_A_87_P193768	1.94105	0.00709417	NM_205530	RFC2	replication factor C (activator 1) 2, 40kDa	gga03030:DNA replication,gga03420:Nucleotide excision repair,gga03430:Mismatch repair,
GT_EA606_A_87_P278483	1.78803	0.0184581	NM_205530	RFC2	replication factor C (activator 1) 2, 40kDa	gga03030:DNA replication,gga03420:Nucleotide excision repair,gga03430:Mismatch repair,
GT_EA606_A_87_P149478	1.56232	0.0149415	NM_001006550	RFC4	replication factor C (activator 1) 4, 37kDa	gga03030:DNA replication,gga03420:Nucleotide excision repair,gga03430:Mismatch repair,
GT_EA606_A_87_P101611	1.97754	0.0451869	ENSGALT00000017404	RPA3	replication protein A3, 14kDa	gga03030:DNA replication,gga03420:Nucleotide excision repair,gga03430:Mismatch repair,gga03440:Homologous recombination,
GT_EA606_A_87_P017044	1.40818	0.00852411	NM_001199459	RDH10	retinol dehydrogenase 10 (all-trans)	gga00830:Retinol metabolism,
GT_EA606_A_87_P013697	1.6851	0.00648035	ENSGALT00000015524	RDH12	retinol dehydrogenase 12 (all-trans/9-cis/11-cis)	gga00830:Retinol metabolism,
GT_EA606_A_87_P264818	1.61134	0.0368354	CR391138	RDH12	retinol dehydrogenase 12 (all-trans/9-cis/11-cis)	gga00830:Retinol metabolism,
GT_EA606_A_87_P100111	1.83519	0.0261847	ENSGALT00000026525	RRM2	ribonucleotide reductase M2 polypeptide	gga00230:Purine metabolism,gga00240:Pyrimidine metabolism,gga00480:Glutathione metabolism,gga04115:p53 signaling pathway,
GT_EA606_A_87_P202208	1.5946	0.135449	XM_001231544	RRM2	ribonucleotide reductase M2 polypeptide	gga00230:Purine metabolism,gga00240:Pyrimidine metabolism,gga00480:Glutathione metabolism,gga04115:p53 signaling pathway,
GT_EA606_A_87_P292948	2.44318	0.0440034	ENSGALT00000026525	RRM2	ribonucleotide reductase M2 polypeptide	gga00230:Purine metabolism,gga00240:Pyrimidine metabolism,gga00480:Glutathione metabolism,gga04115:p53 signaling pathway,
GT_EA606_A_87_P199038	2.00655	0.0596157	ENSGALT00000009501	RPN1	ribophorin I	gga00510:N-Glycan biosynthesis,
GT_EA606_A_87_P202998	2.63155	0.0526311	ENSGALT00000009501	RPN1	ribophorin I	gga00510:N-Glycan biosynthesis,
GT_EA606_A_87_P056296	1.44886	0.0199934	NM_001006288	RPN2	ribophorin II	gga00510:N-Glycan biosynthesis,
GT_EA606_A_87_P050426	1.38667	0.0435183	NM_001006241	RPL3	ribosomal protein L3; similar to ribosomal protein L3	gga03010:Ribosome,
GT_EA606_A_87_P281428	1.59443	0.070469	NM_001006241	RPL3	ribosomal protein L3; similar to ribosomal protein L3	gga03010:Ribosome,
GT_EA606_A_87_P117478	2.07121	0.0794844	BX935419	RPL5	ribosomal protein L5	gga03010:Ribosome,
GT_EA606_A_87_P118098	2.00795	0.0211388	BX950317	RPS21	ribosomal protein S21	gga03010:Ribosome,
GT_EA606_A_87_P270878	1.51452	0.0494094	NM_001079728	RBMX	RNA binding motif protein, X-linked	gga03040:Spliceosome,
GT_EA606_A_87_P023883	2.35022	0.0257115	ENSGALT00000018738	SCARB2	scavenger receptor class B, member 2	gga04142:Lysosome,
GT_EA606_A_87_P017952	1.44393	0.468051	NM_204535	SPP1	secreted phosphoprotein 1 (osteopontin, bone sialoprotein I, early T-lymphocyte activation 1)	gga04510:Focal adhesion,gga04512:ECM-receptor interaction,gga04620:Toll-like receptor signaling pathway,
GT_EA606_A_87_P206178	4.12455	0.139844	NM_204535	SPP1	secreted phosphoprotein 1 (osteopontin, bone sialoprotein I, early T-lymphocyte activation 1)	gga04510:Focal adhesion,gga04512:ECM-receptor interaction,gga04620:Toll-like receptor signaling pathway,
GT_EA606_A_87_P071421	1.71405	0.063817	ENSGALT00000008093	SHMT1	serine hydroxymethyltransferase 1 (soluble)	gga00260:Glycine, serine and threonine metabolism,gga00460:Cyanoamino acid metabolism,gga00670:One carbon pool by folate,gga00680:Methane metabolism,
GT_EA606_A_87_P092791	1.96051	0.173228	ENSGALT00000021979	SPTLC1	serine palmitoyltransferase, long chain base subunit 1	gga00600:Sphingolipid metabolism,
GT_EA606_A_87_P020981	1.71033	0.0320251	ENSGALT00000036477	SETDB2	SET domain, bifurcated 2	gga00310:Lysine degradation,
GT_EA606_A_87_P037629	1.57607	0.0717797	ENSGALT00000039607	SIAH1	seven in absentia homolog 1 (Drosophila)	gga04115:p53 signaling pathway,gga04120:Ubiquitin mediated proteolysis,gga04310:Wnt signaling pathway,
GT_EA606_A_87_P036224	2.07543	0.0588691	NM_001006534	SH3GLB1	SH3-domain GRB2-like endophilin B1	gga04144:Endocytosis,
GT_EA606_A_87_P282643	1.60667	0.188255	NM_001030591	SHISA5	shisa homolog 5 (Xenopus laevis)	gga04115:p53 signaling pathway,
GT_EA606_A_87_P101981	1.57128	0.0299462	NM_001199648	SGOL1	shugoshin-like 1 (S. pombe)	gga04114:Oocyte meiosis,
GT_EA606_A_87_P144873	2.57055	0.0235246	ENSGALT00000016327	SRP54	signal recognition particle 54kDa	gga03060:Protein export,
GT_EA606_A_87_P298268	1.30214	0.0461704	NM_001097536	SRP9	signal recognition particle 9kDa	gga03060:Protein export,
GT_EA606_A_87_P201766	2.11016	0.0827464	NM_001031240	ACADSB	similar to acyl-Coenzyme A dehydrogenase, short/branched chain; hypothetical LOC423948; acyl-Coenzyme A dehydrogenase, short/branched chain	gga00071:Fatty acid metabolism,gga00280:Valine, leucine and isoleucine degradation,
GT_EA606_A_87_P194748	2.57765	0.0282037	ENSGALT00000021334	LOC418170	similar to aldose reductase	gga00040:Pentose and glucuronate interconversions,gga00051:Fructose and mannose metabolism,gga00052:Galactose metabolism,gga00561:Glycerolipid metabolism,gga00620:Pyruvate metabolism,
GT_EA606_A_87_P017858	1.39298	0.0710871	CR353558	GNAL	similar to G-protein alpha-olf subunit; similar to guanine nucleotide binding protein, alpha stimulating, olfactory type; guanine nucleotide binding protein (G protein), alpha activating activity polypeptide, olfactory type	gga04020:Calcium signaling pathway,
GT_EA606_A_87_P307937	1.31286	0.0451642	NM_001008746	GNAL	similar to G-protein alpha-olf subunit; similar to guanine nucleotide binding protein, alpha stimulating, olfactory type; guanine nucleotide binding protein (G protein), alpha activating activity polypeptide, olfactory type	gga04020:Calcium signaling pathway,
GT_EA606_A_87_P247543	2.17684	0.00504316	NM_001012916	HSPD1	similar to similar to 60 kDa heat shock protein, mitochondrial precursor (Hsp60) (60 kDa chaperonin) (CPN60) (Heat shock protein 60) (HSP-60) (Mitochondrial matrix protein P1) (HSP-65); heat shock 60kDa protein 1 (chaperonin); similar to 60 kDa heat shock	gga03018:RNA degradation,
GT_EA606_A_87_P269578	1.3483	0.0328137	NM_001012916	HSPD1	similar to similar to 60 kDa heat shock protein, mitochondrial precursor (Hsp60) (60 kDa chaperonin) (CPN60) (Heat shock protein 60) (HSP-60) (Mitochondrial matrix protein P1) (HSP-65); heat shock 60kDa protein 1 (chaperonin); similar to 60 kDa heat shock	gga03018:RNA degradation,
GT_EA606_A_87_P308182	1.28914	0.00187544	NM_001012916	HSPD1	similar to similar to 60 kDa heat shock protein, mitochondrial precursor (Hsp60) (60 kDa chaperonin) (CPN60) (Heat shock protein 60) (HSP-60) (Mitochondrial matrix protein P1) (HSP-65); heat shock 60kDa protein 1 (chaperonin); similar to 60 kDa heat shock	gga03018:RNA degradation,
GT_EA606_A_87_P308752	1.25956	0.0639761	NM_001012916	HSPD1	similar to similar to 60 kDa heat shock protein, mitochondrial precursor (Hsp60) (60 kDa chaperonin) (CPN60) (Heat shock protein 60) (HSP-60) (Mitochondrial matrix protein P1) (HSP-65); heat shock 60kDa protein 1 (chaperonin); similar to 60 kDa heat shock	gga03018:RNA degradation,
GT_EA606_A_87_P107888	1.05211	0.0978521	ENSGALT00000021337	LOC425137	similar to similar to aldose reductase; aldo-keto reductase family 1, member B1 (aldose reductase); similar to aldose reductase	gga00040:Pentose and glucuronate interconversions,gga00051:Fructose and mannose metabolism,gga00052:Galactose metabolism,gga00561:Glycerolipid metabolism,gga00620:Pyruvate metabolism,
GT_EA606_A_87_P214663	1.60121	0.0710717	NM_001030624	LOC416354	similar to Tcf-3 co-repressor CtBP	gga04310:Wnt signaling pathway,gga04330:Notch signaling pathway,
GT_EA606_A_87_P096266	1.46891	0.0583795	NM_001012581	UGDH	similar to UDP-glucose dehydrogenase; UDP-glucose dehydrogenase	gga00040:Pentose and glucuronate interconversions,gga00053:Ascorbate and aldarate metabolism,gga00500:Starch and sucrose metabolism,gga00520:Amino sugar and nucleotide sugar metabolism,
GT_EA606_A_87_P102236	1.11753	0.0086119	ENSGALT00000019325	SNRPD1	small nuclear ribonucleoprotein D1 polypeptide 16kDa	gga03040:Spliceosome,
GT_EA606_A_87_P015348	1.10013	0.0110217	NM_001007838	SNRPD3	small nuclear ribonucleoprotein D3 polypeptide 18kDa	gga03040:Spliceosome,
GT_EA606_A_87_P194613	1.65803	0.0502568	NM_001005823	SNRPA1	small nuclear ribonucleoprotein polypeptide A'	gga03040:Spliceosome,
GT_EA606_A_87_P022507	2.22229	0.021368	ENSGALT00000031980	SNRPB2	small nuclear ribonucleoprotein polypeptide B''	gga03040:Spliceosome,
GT_EA606_A_87_P037557	1.59528	0.0328237	ENSGALT00000004378	SNRPC	small nuclear ribonucleoprotein polypeptide C	gga03040:Spliceosome,
GT_EA606_A_87_P324942	1.47187	0.0342384	ENSGALT00000004378	SNRPC	small nuclear ribonucleoprotein polypeptide C	gga03040:Spliceosome,
GT_EA606_A_87_P232113	1.97474	0.095323	ENSGALT00000011732	SNRPB	small nuclear ribonucleoprotein polypeptides B and B1	gga03040:Spliceosome,
GT_EA606_A_87_P152298	1.44266	0.0120316	ENSGALT00000001993	SNF8	SNF8, ESCRT-II complex subunit, homolog (S. cerevisiae)	gga04144:Endocytosis,
GT_EA606_A_87_P037123	1.45986	0.0143605	NM_001006443	SLC25A4	solute carrier family 25 (mitochondrial carrier; adenine nucleotide translocator), member 4	gga04020:Calcium signaling pathway,
GT_EA606_A_87_P169878	1.55154	0.0212977	NM_001006443	SLC25A4	solute carrier family 25 (mitochondrial carrier; adenine nucleotide translocator), member 4	gga04020:Calcium signaling pathway,
GT_EA606_A_87_P193403	2.6139	0.00324479	NM_001006443	SLC25A4	solute carrier family 25 (mitochondrial carrier; adenine nucleotide translocator), member 4	gga04020:Calcium signaling pathway,
GT_EA606_A_87_P205548	1.51628	0.104245	ENSGALT00000014121	SLC25A5	solute carrier family 25 (mitochondrial carrier; adenine nucleotide translocator), member 5	gga04020:Calcium signaling pathway,
GT_EA606_A_87_P055126	1.95384	0.10505	NM_204231	SLC25A6	solute carrier family 25 (mitochondrial carrier; adenine nucleotide translocator), member 6	gga04020:Calcium signaling pathway,
GT_EA606_A_87_P211239	2.78113	0.11351	NM_204231	SLC25A6	solute carrier family 25 (mitochondrial carrier; adenine nucleotide translocator), member 6	gga04020:Calcium signaling pathway,
GT_EA606_A_87_P220868	2.78764	0.0965242	NM_204231	SLC25A6	solute carrier family 25 (mitochondrial carrier; adenine nucleotide translocator), member 6	gga04020:Calcium signaling pathway,
GT_EA606_A_87_P271575	2.83819	0.103028	NM_204231	SLC25A6	solute carrier family 25 (mitochondrial carrier; adenine nucleotide translocator), member 6	gga04020:Calcium signaling pathway,
GT_EA606_A_87_P163778	1.58003	0.096987	ENSGALT00000028080	SPDYA	speedy homolog A (Xenopus laevis)	gga04114:Oocyte meiosis,gga04914:Progesterone-mediated oocyte maturation,
GT_EA606_A_87_P035727	2.0167	0.127597	NM_001030803	SMS	spermine synthase	gga00270:Cysteine and methionine metabolism,gga00330:Arginine and proline metabolism,gga00410:beta-Alanine metabolism,gga00480:Glutathione metabolism,
GT_EA606_A_87_P018101	1.8028	0.254713	NM_001006153	SKP1	S-phase kinase-associated protein 1	gga04110:Cell cycle,gga04114:Oocyte meiosis,gga04120:Ubiquitin mediated proteolysis,gga04310:Wnt signaling pathway,gga04350:TGF-beta signaling pathway,
GT_EA606_A_87_P275873	1.47192	0.0436323	NM_001006153	SKP1	S-phase kinase-associated protein 1	gga04110:Cell cycle,gga04114:Oocyte meiosis,gga04120:Ubiquitin mediated proteolysis,gga04310:Wnt signaling pathway,gga04350:TGF-beta signaling pathway,
GT_EA606_A_87_P234943	1.30682	0.18004	XM_429344	SMPD3	sphingomyelin phosphodiesterase 3, neutral membrane (neutral sphingomyelinase II)	gga00600:Sphingolipid metabolism,
GT_EA606_A_87_P231398	1.59562	0.0257747	NM_204390	SGMS1	sphingomyelin synthase 1	gga00600:Sphingolipid metabolism,
GT_EA606_A_87_P119823	1.71016	0.0570927	CR353535	SPRED2	sprouty-related, EVH1 domain containing 2	gga04630:Jak-STAT signaling pathway,
GT_EA606_A_87_P286793	2.07415	0.0148269	NM_205241	ST6GAL1	ST6 beta-galactosamide alpha-2,6-sialyltranferase 1	gga00510:N-Glycan biosynthesis,
GT_EA606_A_87_P064306	2.02697	0.0630608	NM_001001858	STMN1	stathmin 1	gga04010:MAPK signaling pathway,
GT_EA606_A_87_P259468	2.14301	0.0208368	ENSGALT00000018216	SCD5	stearoyl-CoA desaturase 5	gga01040:Biosynthesis of unsaturated fatty acids,gga03320:PPAR signaling pathway,
GT_EA606_A_87_P289748	2.79765	0.0513155	ENSGALT00000015566	SC4MOL	sterol-C4-methyl oxidase-like	gga00100:Steroid biosynthesis,
GT_EA606_A_87_P234933	1.45309	0.147192	NM_001031513	STT3B	STT3, subunit of the oligosaccharyltransferase complex, homolog B (S. cerevisiae)	gga00510:N-Glycan biosynthesis,
GT_EA606_A_87_P037907	1.07133	0.00233541	ENSGALT00000030988	SDHA	succinate dehydrogenase complex, subunit A, flavoprotein (Fp)	gga00020:Citrate cycle (TCA cycle),gga00190:Oxidative phosphorylation,
GT_EA606_A_87_P146713	1.20225	0.00889095	NM_001080875	SDHB	succinate dehydrogenase complex, subunit B, iron sulfur (Ip)	gga00020:Citrate cycle (TCA cycle),gga00190:Oxidative phosphorylation,
GT_EA606_A_87_P013187	1.9669	0.045069	NM_001006321	SDHD	succinate dehydrogenase complex, subunit D, integral membrane protein	gga00020:Citrate cycle (TCA cycle),gga00190:Oxidative phosphorylation,
GT_EA606_A_87_P296223	1.59684	0.0163219	NM_001012892	SUCLG1	succinate-CoA ligase, GDP-forming, alpha subunit	gga00020:Citrate cycle (TCA cycle),gga00640:Propanoate metabolism,
GT_EA606_A_87_P057376	1.16806	0.0342689	NM_001137648	SOCS1	suppressor of cytokine signaling 1	gga04120:Ubiquitin mediated proteolysis,gga04630:Jak-STAT signaling pathway,gga04910:Insulin signaling pathway,
GT_EA606_A_87_P151233	1.65857	0.0558853	NM_001137648	SOCS1	suppressor of cytokine signaling 1	gga04120:Ubiquitin mediated proteolysis,gga04630:Jak-STAT signaling pathway,gga04910:Insulin signaling pathway,
GT_EA606_A_87_P193088	1.44269	0.0813737	NM_001006324	SIKE1	suppressor of IKK epsilon	gga04622:RIG-I-like receptor signaling pathway,
GT_EA606_A_87_P092211	2.01235	0.000890312	ENSGALT00000032846	SV2C	synaptic vesicle glycoprotein 2C	gga04512:ECM-receptor interaction,
GT_EA606_A_87_P013102	1.42255	0.0915434	NM_001030652	SNAP29	synaptosomal-associated protein, 29kDa	gga04130:SNARE interactions in vesicular transport,
GT_EA606_A_87_P241958	1.53196	0.0846606	NM_001030652	SNAP29	synaptosomal-associated protein, 29kDa	gga04130:SNARE interactions in vesicular transport,
GT_EA606_A_87_P104858	1.4128	3.60714e-05	NM_001001462	SDC2	syndecan 2	gga04512:ECM-receptor interaction,gga04514:Cell adhesion molecules (CAMs),
GT_EA606_A_87_P059721	2.43849	0.0107529	NM_001007869	SDC4	syndecan 4	gga04512:ECM-receptor interaction,gga04514:Cell adhesion molecules (CAMs),
GT_EA606_A_87_P109063	1.63162	0.0157131	ENSGALT00000024862	STX19	syntaxin 19	gga04130:SNARE interactions in vesicular transport,
GT_EA606_A_87_P099071	1.80004	0.0991675	NM_001012943	STX7	syntaxin 7; similar to syntaxin 7	gga04130:SNARE interactions in vesicular transport,
GT_EA606_A_87_P023346	1.68071	0.0265033	ENSGALT00000006654	TAF9	TAF9 RNA polymerase II, TATA box binding protein (TBP)-associated factor, 32kDa	gga03022:Basal transcription factors,
GT_EA606_A_87_P129478	1.95159	0.0631184	NM_205103	TBP	TATA box binding protein	gga03022:Basal transcription factors,
GT_EA606_A_87_P238758	3.24981	0.0204353	ENSGALT00000017199	TXNDC12	thioredoxin domain containing 12 (endoplasmic reticulum)	gga00480:Glutathione metabolism,
GT_EA606_A_87_P014105	1.2444	0.0579782	NM_001122691	TXNRD2	thioredoxin reductase 2	gga00240:Pyrimidine metabolism,
GT_EA606_A_87_P073966	2.3053	0.0353935	NM_001122777	TXNRD3	thioredoxin reductase 3	gga00240:Pyrimidine metabolism,
GT_EA606_A_87_P245543	1.89535	0.0564133	NM_001122777	TXNRD3	thioredoxin reductase 3	gga00240:Pyrimidine metabolism,
GT_EA606_A_87_P143063	1.59756	0.202569	NM_001031447	TARS	threonyl-tRNA synthetase	gga00970:Aminoacyl-tRNA biosynthesis,
GT_EA606_A_87_P130563	2.24114	0.109523	ENSGALT00000038635	THBS4	thrombospondin 4	gga04350:TGF-beta signaling pathway,gga04510:Focal adhesion,gga04512:ECM-receptor interaction,
GT_EA606_A_87_P104073	3.03145	0.0784217	ENSGALT00000024028	TYMS	thymidylate synthetase	gga00240:Pyrimidine metabolism,gga00670:One carbon pool by folate,
GT_EA606_A_87_P036513	2.29403	0.236293	NM_001006471	TOLLIP	toll interacting protein	gga04620:Toll-like receptor signaling pathway,
GT_EA606_A_87_P059736	1.91378	0.177799	NM_001161650	TLR2-2	toll-like receptor 2	gga04620:Toll-like receptor signaling pathway,
GT_EA606_A_87_P055921	1.60854	0.0252318	NM_001024586	TLR5	toll-like receptor 5	gga04620:Toll-like receptor signaling pathway,
GT_EA606_A_87_P089741	1.76514	0.0263691	NM_001031177	TALDO1	transaldolase 1	gga00030:Pentose phosphate pathway,
GT_EA606_A_87_P157383	2.84695	0.0266526	NM_001031177	TALDO1	transaldolase 1	gga00030:Pentose phosphate pathway,
GT_EA606_A_87_P124778	1.44985	0.00201922	NM_001007888	TCEB1	transcription elongation factor B (SIII), polypeptide 1 (15kDa, elongin C)	gga04120:Ubiquitin mediated proteolysis,
GT_EA606_A_87_P009810	2.1438	0.0383816	NM_204246	TGFBR1	transforming growth factor, beta receptor I (activin A receptor type II-like kinase, 53kDa)	gga04010:MAPK signaling pathway,gga04144:Endocytosis,gga04350:TGF-beta signaling pathway,gga04520:Adherens junction,
GT_EA606_A_87_P057561	2.28029	0.00847281	NM_204246	TGFBR1	transforming growth factor, beta receptor I (activin A receptor type II-like kinase, 53kDa)	gga04010:MAPK signaling pathway,gga04144:Endocytosis,gga04350:TGF-beta signaling pathway,gga04520:Adherens junction,
GT_EA606_A_87_P194553	2.05655	0.0833596	ENSGALT00000008512	TKT	transketolase (Wernicke-Korsakoff syndrome)	gga00030:Pentose phosphate pathway,
GT_EA606_A_87_P108093	1.18126	0.0178371	ENSGALT00000022911	TSPO	translocator protein (18kDa)	gga04080:Neuroactive ligand-receptor interaction,
GT_EA606_A_87_P009411	1.12859	0.0628701	NM_205451	TPI1	triosephosphate isomerase 1	gga00010:Glycolysis / Gluconeogenesis,gga00051:Fructose and mannose metabolism,gga00562:Inositol phosphate metabolism,
GT_EA606_A_87_P140058	1.17471	0.0347403	NM_205451	TPI1	triosephosphate isomerase 1	gga00010:Glycolysis / Gluconeogenesis,gga00051:Fructose and mannose metabolism,gga00562:Inositol phosphate metabolism,
GT_EA606_A_87_P231393	1.3838	0.340742	NM_001006224	TRIM37	tripartite motif-containing 37	gga04120:Ubiquitin mediated proteolysis,
GT_EA606_A_87_P279288	1.30436	0.12537	NM_001006224	TRIM37	tripartite motif-containing 37	gga04120:Ubiquitin mediated proteolysis,
GT_EA606_A_87_P075896	1.61518	0.0845956	NM_205401	TPM1	tropomyosin 1 (alpha)	gga04260:Cardiac muscle contraction,
GT_EA606_A_87_P094746	1.36502	0.285638	ENSGALT00000015264	TDO2	tryptophan 2,3-dioxygenase	gga00380:Tryptophan metabolism,
GT_EA606_A_87_P056136	1.92443	0.216966	NM_001001301	TPH2	tryptophan hydroxylase 2	gga00380:Tryptophan metabolism,
GT_EA606_A_87_P209543	2.46188	0.043002	ENSGALT00000018316	WARS	tryptophanyl-tRNA synthetase	gga00380:Tryptophan metabolism,gga00970:Aminoacyl-tRNA biosynthesis,
GT_EA606_A_87_P226673	1.65768	0.0417955	AJ720191	TNFSF10	tumor necrosis factor (ligand) superfamily, member 10	gga04060:Cytokine-cytokine receptor interaction,gga04210:Apoptosis,gga04650:Natural killer cell mediated cytotoxicity,
GT_EA606_A_87_P053251	1.97271	0.161148	NM_001033641	TNFRSF11B	tumor necrosis factor receptor superfamily, member 11b (osteoprotegerin)	gga04060:Cytokine-cytokine receptor interaction,
GT_EA606_A_87_P195503	1.40984	0.17734	ENSGALT00000026619	TP53I3	tumor protein p53 inducible protein 3	gga04115:p53 signaling pathway,
GT_EA606_A_87_P266498	1.66915	0.188503	ENSGALT00000026619	TP53I3	tumor protein p53 inducible protein 3	gga04115:p53 signaling pathway,
GT_EA606_A_87_P022930	1.98036	0.0347178	ENSGALT00000022234	TUSC3	tumor suppressor candidate 3	gga00510:N-Glycan biosynthesis,
GT_EA606_A_87_P263608	1.44717	0.0562733	ENSGALT00000022234	TUSC3	tumor suppressor candidate 3	gga00510:N-Glycan biosynthesis,
GT_EA606_A_87_P225148	1.92772	0.120004	NM_001006289	YWHAB	tyrosine 3-monooxygenase/tryptophan 5-monooxygenase activation protein, beta polypeptide	gga04110:Cell cycle,gga04114:Oocyte meiosis,
GT_EA606_A_87_P195170	2.76885	0.0745611	NM_001031343	YWHAZ	tyrosine 3-monooxygenase/tryptophan 5-monooxygenase activation protein, zeta polypeptide	gga04110:Cell cycle,gga04114:Oocyte meiosis,
GT_EA606_A_87_P235119	2.66418	0.094855	NM_001031343	YWHAZ	tyrosine 3-monooxygenase/tryptophan 5-monooxygenase activation protein, zeta polypeptide	gga04110:Cell cycle,gga04114:Oocyte meiosis,
GT_EA606_A_87_P075461	1.22333	0.137988	ENSGALT00000001314	TAT	tyrosine aminotransferase	gga00130:Ubiquinone and other terpenoid-quinone biosynthesis,gga00270:Cysteine and methionine metabolism,gga00350:Tyrosine metabolism,gga00360:Phenylalanine metabolism,gga00400:Phenylalanine, tyrosine and tryptophan biosynthesis,
GT_EA606_A_87_P158658	4.41632	0.0124559	ENSGALT00000001314	TAT	tyrosine aminotransferase	gga00130:Ubiquinone and other terpenoid-quinone biosynthesis,gga00270:Cysteine and methionine metabolism,gga00350:Tyrosine metabolism,gga00360:Phenylalanine metabolism,gga00400:Phenylalanine, tyrosine and tryptophan biosynthesis,
GT_EA606_A_87_P107733	1.19067	0.0367476	ENSGALT00000021073	YARS2	tyrosyl-tRNA synthetase 2, mitochondrial	gga00970:Aminoacyl-tRNA biosynthesis,
GT_EA606_A_87_P205078	2.04773	0.0155823	ENSGALT00000021073	YARS2	tyrosyl-tRNA synthetase 2, mitochondrial	gga00970:Aminoacyl-tRNA biosynthesis,
GT_EA606_A_87_P104853	1.60822	0.0618805	ENSGALT00000025768	UQCRB	ubiquinol-cytochrome c reductase binding protein	gga00190:Oxidative phosphorylation,gga04260:Cardiac muscle contraction,
GT_EA606_A_87_P020196	2.24908	0.0283132	ENSGALT00000009300	UQCRC1	ubiquinol-cytochrome c reductase core protein I	gga00190:Oxidative phosphorylation,gga04260:Cardiac muscle contraction,
GT_EA606_A_87_P229233	1.19826	0.0107466	ENSGALT00000009300	UQCRC1	ubiquinol-cytochrome c reductase core protein I	gga00190:Oxidative phosphorylation,gga04260:Cardiac muscle contraction,
GT_EA606_A_87_P246373	2.24814	0.0181215	ENSGALT00000009300	UQCRC1	ubiquinol-cytochrome c reductase core protein I	gga00190:Oxidative phosphorylation,gga04260:Cardiac muscle contraction,
GT_EA606_A_87_P190203	1.18469	0.00563188	ENSGALT00000003923	UQCRC2	ubiquinol-cytochrome c reductase core protein II	gga00190:Oxidative phosphorylation,gga04260:Cardiac muscle contraction,
GT_EA606_A_87_P210228	1.05284	0.00614075	ENSGALT00000003923	UQCRC2	ubiquinol-cytochrome c reductase core protein II	gga00190:Oxidative phosphorylation,gga04260:Cardiac muscle contraction,
GT_EA606_A_87_P255668	1.35156	0.0345832	ENSGALT00000003923	UQCRC2	ubiquinol-cytochrome c reductase core protein II	gga00190:Oxidative phosphorylation,gga04260:Cardiac muscle contraction,
GT_EA606_A_87_P079996	2.07567	0.040668	NM_001199526	UBE2D1	ubiquitin-conjugating enzyme E2D 1 (UBC4/5 homolog, yeast)	gga04120:Ubiquitin mediated proteolysis,
GT_EA606_A_87_P066156	1.62273	0.0511226	NM_001080883	UBE2G1	ubiquitin-conjugating enzyme E2G 1 (UBC7 homolog, yeast)	gga04120:Ubiquitin mediated proteolysis,
GT_EA606_A_87_P141218	2.04803	0.0187783	NM_001080883	UBE2G1	ubiquitin-conjugating enzyme E2G 1 (UBC7 homolog, yeast)	gga04120:Ubiquitin mediated proteolysis,
GT_EA606_A_87_P193500	2.16676	0.128628	NM_204265	UBE2I	ubiquitin-conjugating enzyme E2I (UBC9 homolog, yeast)	gga04120:Ubiquitin mediated proteolysis,
GT_EA606_A_87_P068861	1.70521	0.0529879	NM_001006180	UBE2L3	ubiquitin-conjugating enzyme E2L 3	gga04120:Ubiquitin mediated proteolysis,
GT_EA606_A_87_P202333	1.5282	0.0815869	ENSGALT00000002003	UBE2Z	ubiquitin-conjugating enzyme E2Z (putative)	gga04120:Ubiquitin mediated proteolysis,
GT_EA606_A_87_P277258	4.53298	0.269198	ENSGALT00000002003	UBE2Z	ubiquitin-conjugating enzyme E2Z (putative)	gga04120:Ubiquitin mediated proteolysis,
GT_EA606_A_87_P021762	1.92813	0.138409	BX936208	UGT1A1	UDP glucuronosyltransferase 1 family, polypeptide A1	gga00040:Pentose and glucuronate interconversions,gga00053:Ascorbate and aldarate metabolism,gga00140:Steroid hormone biosynthesis,gga00150:Androgen and estrogen metabolism,gga00500:Starch and sucrose metabolism,gga00830:Retinol metabolism,gga00860:Porphy
GT_EA606_A_87_P280403	1.57172	0.0516191	ENSGALT00000024311	B4GALT4	UDP-Gal:betaGlcNAc beta 1,4- galactosyltransferase, polypeptide 4	gga00533:Keratan sulfate biosynthesis,gga00601:Glycosphingolipid biosynthesis,
GT_EA606_A_87_P051451	1.11417	0.00328855	NM_001031016	B4GALT6	UDP-Gal:betaGlcNAc beta 1,4- galactosyltransferase, polypeptide 6	gga00600:Sphingolipid metabolism,
GT_EA606_A_87_P056401	1.5658	0.0591572	NM_001113761	B3GNT5	UDP-GlcNAc:betaGal beta-1,3-N-acetylglucosaminyltransferase 5	gga00601:Glycosphingolipid biosynthesis,
GT_EA606_A_87_P127468	2.41158	0.0548955	NM_001113761	B3GNT5	UDP-GlcNAc:betaGal beta-1,3-N-acetylglucosaminyltransferase 5	gga00601:Glycosphingolipid biosynthesis,
GT_EA606_A_87_P149248	1.26424	0.127419	ENSGALT00000010074	GALNT11	UDP-N-acetyl-alpha-D-galactosamine:polypeptide N-acetylgalactosaminyltransferase 11 (GalNAc-T11)	gga00512:O-Glycan biosynthesis,
GT_EA606_A_87_P015851	1.18534	0.159096	ENSGALT00000017839	GALNT3	UDP-N-acetyl-alpha-D-galactosamine:polypeptide N-acetylgalactosaminyltransferase 3 (GalNAc-T3)	gga00512:O-Glycan biosynthesis,
GT_EA606_A_87_P022601	1.41358	0.0384524	NM_001199584	GALNTL4	UDP-N-acetyl-alpha-D-galactosamine:polypeptide N-acetylgalactosaminyltransferase-like 4	gga00512:O-Glycan biosynthesis,
GT_EA606_A_87_P037570	1.35942	0.125082	NM_204189	UNG	uracil-DNA glycosylase	gga03410:Base excision repair,
GT_EA606_A_87_P018689	3.04697	0.0384857	ENSGALT00000010703	UPB1	ureidopropionase, beta	gga00240:Pyrimidine metabolism,gga00410:beta-Alanine metabolism,gga00770:Pantothenate and CoA biosynthesis,gga00983:Drug metabolism,
GT_EA606_A_87_P190288	1.63573	0.042664	NM_001031260	UMPS	uridine monophosphate synthetase (orotate phosphoribosyl transferase and orotidine-5'-decarboxylase)	gga00240:Pyrimidine metabolism,gga00983:Drug metabolism,
GT_EA606_A_87_P011686	2.01985	0.523476	ENSGALT00000031003	UPP1	uridine phosphorylase 1	gga00240:Pyrimidine metabolism,gga00983:Drug metabolism,
GT_EA606_A_87_P068496	2.21981	0.191143	ENSGALT00000005921	UCK1	uridine-cytidine kinase 1	gga00240:Pyrimidine metabolism,gga00983:Drug metabolism,
GT_EA606_A_87_P031590	1.59075	0.132596	ENSGALT00000016612	UROD	uroporphyrinogen decarboxylase	gga00860:Porphyrin and chlorophyll metabolism,
GT_EA606_A_87_P320667	1.5333	0.113434	ENSGALT00000016612	UROD	uroporphyrinogen decarboxylase	gga00860:Porphyrin and chlorophyll metabolism,
GT_EA606_A_87_P147608	1.52914	0.0116477	ENSGALT00000022257	UROS	uroporphyrinogen III synthase (congenital erythropoietic porphyria)	gga00860:Porphyrin and chlorophyll metabolism,
GT_EA606_A_87_P312642	2.22164	0.00219943	ENSGALT00000022257	UROS	uroporphyrinogen III synthase (congenital erythropoietic porphyria)	gga00860:Porphyrin and chlorophyll metabolism,
GT_EA606_A_87_P013305	2.3926	0.0279031	ENSGALT00000025484	VPS24	vacuolar protein sorting 24 homolog (S. cerevisiae)	gga04144:Endocytosis,
GT_EA606_A_87_P096791	1.36315	0.0400007	ENSGALT00000025484	VPS24	vacuolar protein sorting 24 homolog (S. cerevisiae)	gga04144:Endocytosis,
GT_EA606_A_87_P111073	1.42087	0.0396645	ENSGALT00000027510	VPS36	vacuolar protein sorting 36 homolog (S. cerevisiae)	gga04144:Endocytosis,
GT_EA606_A_87_P249378	2.07659	0.199061	NM_001031593	VPS45	vacuolar protein sorting 45 homolog (S. cerevisiae); similar to vacuolar protein sorting 45A (yeast)	gga04144:Endocytosis,
GT_EA606_A_87_P057766	1.49888	0.0491959	NM_205055	AKT1	v-akt murine thymoma viral oncogene homolog 1	gga04010:MAPK signaling pathway,gga04012:ErbB signaling pathway,gga04150:mTOR signaling pathway,gga04210:Apoptosis,gga04370:VEGF signaling pathway,gga04510:Focal adhesion,gga04530:Tight junction,gga04620:Toll-like receptor signaling pathway,gga04630:Jak-S
GT_EA606_A_87_P021532	3.02327	0.0330401	ENSGALT00000008441	VCAM1	vascular cell adhesion molecule 1	gga04514:Cell adhesion molecules (CAMs),
GT_EA606_A_87_P021826	1.62159	2.28892e-05	ENSGALT00000017629	VEGFC	vascular endothelial growth factor C	gga04060:Cytokine-cytokine receptor interaction,gga04150:mTOR signaling pathway,gga04510:Focal adhesion,
GT_EA606_A_87_P134623	1.40264	0.0193839	ENSGALT00000017629	VEGFC	vascular endothelial growth factor C	gga04060:Cytokine-cytokine receptor interaction,gga04150:mTOR signaling pathway,gga04510:Focal adhesion,
GT_EA606_A_87_P118008	1.72459	0.10636	NM_001014970	VIPR2	vasoactive intestinal peptide receptor 2	gga04080:Neuroactive ligand-receptor interaction,
GT_EA606_A_87_P229048	2.46039	0.0268065	NM_206863	VAV3	vav 3 oncogene	gga04510:Focal adhesion,gga04650:Natural killer cell mediated cytotoxicity,gga04810:Regulation of actin cytoskeleton,
GT_EA606_A_87_P140518	1.28768	0.20364	NM_001007846	CRK	v-crk sarcoma virus CT10 oncogene	gga04010:MAPK signaling pathway,gga04012:ErbB signaling pathway,gga04510:Focal adhesion,gga04810:Regulation of actin cytoskeleton,gga04910:Insulin signaling pathway,
GT_EA606_A_87_P195323	1.75482	0.0401757	ENSGALT00000015509	VTI1B	vesicle transport through interaction with t-SNAREs homolog 1B (yeast)	gga04130:SNARE interactions in vesicular transport,
GT_EA606_A_87_P272343	1.50814	0.0368453	ENSGALT00000015509	VTI1B	vesicle transport through interaction with t-SNAREs homolog 1B (yeast)	gga04130:SNARE interactions in vesicular transport,
GT_EA606_A_87_P024329	1.67878	0.109521	ENSGALT00000008844	VAMP2	vesicle-associated membrane protein 2 (synaptobrevin 2)	gga04130:SNARE interactions in vesicular transport,
GT_EA606_A_87_P078451	1.28504	0.104195	ENSGALT00000005165	VAMP4	vesicle-associated membrane protein 4	gga04130:SNARE interactions in vesicular transport,
GT_EA606_A_87_P192978	3.72212	0.0241044	NM_205508	FOS	v-fos FBJ murine osteosarcoma viral oncogene homolog	gga04010:MAPK signaling pathway,gga04620:Toll-like receptor signaling pathway,
GT_EA606_A_87_P054376	3.27652	0.0654091	NM_205061	VTN	vitronectin	gga04510:Focal adhesion,gga04512:ECM-receptor interaction,
GT_EA606_A_87_P193248	2.16908	0.0394669	NM_001033869	VDAC1	voltage-dependent anion channel 1	gga04020:Calcium signaling pathway,
GT_EA606_A_87_P239473	1.979	0.0136861	NM_204741	VDAC2	voltage-dependent anion channel 2	gga04020:Calcium signaling pathway,
GT_EA606_A_87_P281768	2.32647	0.0165877	NM_204741	VDAC2	voltage-dependent anion channel 2	gga04020:Calcium signaling pathway,
GT_EA606_A_87_P021494	2.17002	0.0364271	ENSGALT00000029612	VDAC3	voltage-dependent anion channel 3	gga04020:Calcium signaling pathway,
GT_EA606_A_87_P219628	2.17342	0.012363	ENSGALT00000029612	VDAC3	voltage-dependent anion channel 3	gga04020:Calcium signaling pathway,
GT_EA606_A_87_P203638	1.48443	0.0372371	ENSGALT00000022415	VTA1	Vps20-associated 1 homolog (S. cerevisiae)	gga04144:Endocytosis,
GT_EA606_A_87_P111318	1.89389	0.0557586	ENSGALT00000027626	WASF3	WAS protein family, member 3	gga04520:Adherens junction,
GT_EA606_A_87_P036398	1.52284	0.0326474	NM_001005805	WDR61	WD repeat domain 61	gga03018:RNA degradation,
GT_EA606_A_87_P298953	2.30403	0.123212	NM_001031181	WEE1	WEE1 homolog (S. pombe)	gga04110:Cell cycle,
GT_EA606_A_87_P024213	1.4771	0.0686269	ENSGALT00000010141	XRCC2	X-ray repair complementing defective repair in Chinese hamster cells 2	gga03440:Homologous recombination,
GT_EA606_A_87_P152308	1.53304	0.0247207	ENSGALT00000010141	XRCC2	X-ray repair complementing defective repair in Chinese hamster cells 2	gga03440:Homologous recombination,
GT_EA606_A_87_P269593	1.56019	0.0509126	ENSGALT00000010141	XRCC2	X-ray repair complementing defective repair in Chinese hamster cells 2	gga03440:Homologous recombination,
GT_EA606_A_87_P036148	1.63641	0.0465565	NM_001031465	ZMAT2	zinc finger, matrin type 2	gga03040:Spliceosome,

## Sheet: 7th down pathways
Probe Set IDs	Fold change	p-value	Accession number	Gene ID	Gene Name	KEGG_PATHWAY
GT_EA606_A_87_P127003	-1.32806	0.034776	NM_204324	PAFAH1B1	platelet-activating factor acetylhydrolase, isoform Ib, alpha subunit 45kDa	gga00565:Ether lipid metabolism,
GT_EA606_A_87_P208313	-1.26991	0.00660615	NM_204324	PAFAH1B1	platelet-activating factor acetylhydrolase, isoform Ib, alpha subunit 45kDa	gga00565:Ether lipid metabolism,
GT_EA606_A_87_P037590	-1.67285	0.0887961	ENSGALT00000005084	NODAL	nodal homolog (mouse)	gga04350:TGF-beta signaling pathway,
GT_EA606_A_87_P037759	-2.73657	0.227189	NM_204475	SMAD3	SMAD family member 3	gga04110:Cell cycle,gga04310:Wnt signaling pathway,gga04350:TGF-beta signaling pathway,gga04520:Adherens junction,
GT_EA606_A_87_P009058	-1.51664	0.0255335	NM_001012767	FGF8	fibroblast growth factor 8 (androgen-induced)	gga04010:MAPK signaling pathway,gga04810:Regulation of actin cytoskeleton,
GT_EA606_A_87_P059686	-1.2485	0.0207005	NM_001012767	FGF8	fibroblast growth factor 8 (androgen-induced)	gga04010:MAPK signaling pathway,gga04810:Regulation of actin cytoskeleton,
GT_EA606_A_87_P056891	-1.32096	0.017747	NM_204948	LFNG	LFNG O-fucosylpeptide 3-beta-N-acetylglucosaminyltransferase	gga04330:Notch signaling pathway,
GT_EA606_A_87_P277628	-1.92793	0.170602	NM_204948	LFNG	LFNG O-fucosylpeptide 3-beta-N-acetylglucosaminyltransferase	gga04330:Notch signaling pathway,
GT_EA606_A_87_P009479	-1.96219	0.097309	NM_204821	SHH	sonic hedgehog homolog (Drosophila)	gga04340:Hedgehog signaling pathway,
GT_EA606_A_87_P055911	-2.0223	0.162765	NM_204510	CXCL12	chemokine (C-X-C motif) ligand 12 (stromal cell-derived factor 1)	gga04060:Cytokine-cytokine receptor interaction,gga04672:Intestinal immune network for IgA production,
GT_EA606_A_87_P133173	-1.82873	0.223058	NM_204510	CXCL12	chemokine (C-X-C motif) ligand 12 (stromal cell-derived factor 1)	gga04060:Cytokine-cytokine receptor interaction,gga04672:Intestinal immune network for IgA production,
GT_EA606_A_87_P118398	-1.52416	0.084086	NM_204450	CREB1	cAMP responsive element binding protein 1	gga04916:Melanogenesis,
GT_EA606_A_87_P009421	-2.32368	0.00689208	NM_205357	BMPR1A	bone morphogenetic protein receptor, type IA	gga04350:TGF-beta signaling pathway,
GT_EA606_A_87_P079881	-2.896	0.106593	NM_205357	BMPR1A	bone morphogenetic protein receptor, type IA	gga04350:TGF-beta signaling pathway,
GT_EA606_A_87_P079886	-2.74887	0.130204	NM_205357	BMPR1A	bone morphogenetic protein receptor, type IA	gga04350:TGF-beta signaling pathway,
GT_EA606_A_87_P021726	-1.22633	0.0234614	BX950255	JAG2	jagged 2	gga04330:Notch signaling pathway,
GT_EA606_A_87_P057751	-1.24414	0.0155668	NM_001144848	DRD1	dopamine receptor D1	gga04020:Calcium signaling pathway,gga04080:Neuroactive ligand-receptor interaction,gga04540:Gap junction,
GT_EA606_A_87_P035251	-3.20969	0.0529499	NM_205042	VEGFA	vascular endothelial growth factor A	gga04150:mTOR signaling pathway,gga04510:Focal adhesion,
GT_EA606_A_87_P035151	-3.18554	0.0641805	NM_206979	GRIN1	glutamate receptor, ionotropic, N-methyl D-aspartate 1	gga04020:Calcium signaling pathway,gga04080:Neuroactive ligand-receptor interaction,
GT_EA606_A_87_P054536	-1.63271	0.0775773	NM_001105315	KITLG	KIT ligand	gga04060:Cytokine-cytokine receptor interaction,gga04916:Melanogenesis,
GT_EA606_A_87_P114388	-1.95035	0.0691182	NM_001206510	TCF7L2	transcription factor 7-like 2 (T-cell specific, HMG-box)	gga04310:Wnt signaling pathway,gga04520:Adherens junction,gga04916:Melanogenesis,
GT_EA606_A_87_P102286	-1.37398	0.0217849	NM_001007823	RPSA	ribosomal protein SA	gga03010:Ribosome,
GT_EA606_A_87_P037614	-2.05332	0.14364	NM_204547	TCF7	transcription factor 7 (T-cell specific, HMG-box)	gga04310:Wnt signaling pathway,gga04520:Adherens junction,gga04916:Melanogenesis,
GT_EA606_A_87_P262303	-2.31663	0.0696419	NM_204547	TCF7	transcription factor 7 (T-cell specific, HMG-box)	gga04310:Wnt signaling pathway,gga04520:Adherens junction,gga04916:Melanogenesis,
GT_EA606_A_87_P037939	-1.81327	0.273326	NM_204854	PRLR	prolactin receptor	gga04060:Cytokine-cytokine receptor interaction,gga04080:Neuroactive ligand-receptor interaction,gga04630:Jak-STAT signaling pathway,
GT_EA606_A_87_P091771	-2.46702	0.120609	NM_204854	PRLR	prolactin receptor	gga04060:Cytokine-cytokine receptor interaction,gga04080:Neuroactive ligand-receptor interaction,gga04630:Jak-STAT signaling pathway,
GT_EA606_A_87_P129148	-2.73375	0.0528754	NM_204854	PRLR	prolactin receptor	gga04060:Cytokine-cytokine receptor interaction,gga04080:Neuroactive ligand-receptor interaction,gga04630:Jak-STAT signaling pathway,
GT_EA606_A_87_P009820	-1.62743	0.341855	NM_205127	XDH	xanthine dehydrogenase	gga00230:Purine metabolism,gga00232:Caffeine metabolism,gga00983:Drug metabolism,
GT_EA606_A_87_P114653	-3.26673	0.152671	NM_205127	XDH	xanthine dehydrogenase	gga00230:Purine metabolism,gga00232:Caffeine metabolism,gga00983:Drug metabolism,
GT_EA606_A_87_P290573	-2.65316	0.00022702	NM_204417	PTPRC	protein tyrosine phosphatase, receptor type, C	gga04514:Cell adhesion molecules (CAMs),
GT_EA606_A_87_P009351	-1.18862	0.0263969	NM_205462	RPS15	ribosomal protein S15	gga03010:Ribosome,
GT_EA606_A_87_P144563	-2.46883	0.0831846	DR415750	RPS15	ribosomal protein S15	gga03010:Ribosome,
GT_EA606_A_87_P035335	-4.17336	0.0308292	NM_001030538	JAK2	Janus kinase 2 (a protein tyrosine kinase)	gga04630:Jak-STAT signaling pathway,gga04920:Adipocytokine signaling pathway,
GT_EA606_A_87_P102841	-3.42419	0.163803	NM_205466	PRL	prolactin	gga04060:Cytokine-cytokine receptor interaction,gga04080:Neuroactive ligand-receptor interaction,gga04630:Jak-STAT signaling pathway,
GT_EA606_A_87_P113198	-2.67381	0.211187	ENSGALT00000026316	POLA1	polymerase (DNA directed), alpha 1	gga00230:Purine metabolism,gga00240:Pyrimidine metabolism,gga03030:DNA replication,
GT_EA606_A_87_P109663	-2.71463	0.08686	ENSGALT00000026110	CBS	cystathionine-beta-synthase	gga00260:Glycine, serine and threonine metabolism,gga00270:Cysteine and methionine metabolism,gga00450:Selenoamino acid metabolism,
GT_EA606_A_87_P142790	-1.19704	0.0236562	NM_001031104	MTR	5-methyltetrahydrofolate-homocysteine methyltransferase	gga00270:Cysteine and methionine metabolism,gga00670:One carbon pool by folate,
GT_EA606_A_87_P237408	-2.06488	0.0193817	NM_001031104	MTR	5-methyltetrahydrofolate-homocysteine methyltransferase	gga00270:Cysteine and methionine metabolism,gga00670:One carbon pool by folate,
GT_EA606_A_87_P013027	-1.79192	0.0200278	ENSGALT00000017158	PAPSS1	3'-phosphoadenosine 5'-phosphosulfate synthase 1	gga00230:Purine metabolism,gga00450:Selenoamino acid metabolism,gga00920:Sulfur metabolism,
GT_EA606_A_87_P080166	-1.80999	0.0165009	ENSGALT00000005844	PAPSS2	3'-phosphoadenosine 5'-phosphosulfate synthase 2	gga00230:Purine metabolism,gga00450:Selenoamino acid metabolism,gga00920:Sulfur metabolism,
GT_EA606_A_87_P037952	-2.51919	0.0205243	NM_205013	LEF1	lymphoid enhancer-binding factor 1; similar to lymphoid enhancer-binding factor 1	gga04310:Wnt signaling pathway,gga04520:Adherens junction,gga04916:Melanogenesis,
GT_EA606_A_87_P053466	-1.2844	0.0662158	NM_205013	LEF1	lymphoid enhancer-binding factor 1; similar to lymphoid enhancer-binding factor 1	gga04310:Wnt signaling pathway,gga04520:Adherens junction,gga04916:Melanogenesis,
GT_EA606_A_87_P036883	-3.02614	0.144385	NM_001012532	EHMT1	euchromatic histone-lysine N-methyltransferase 1	gga00310:Lysine degradation,
GT_EA606_A_87_P056366	-1.36201	0.0627829	NM_001012532	EHMT1	euchromatic histone-lysine N-methyltransferase 1	gga00310:Lysine degradation,
GT_EA606_A_87_P191823	-1.29525	0.0117311	NM_001012532	EHMT1	euchromatic histone-lysine N-methyltransferase 1	gga00310:Lysine degradation,
GT_EA606_A_87_P226308	-3.62627	0.0526942	NM_001012532	EHMT1	euchromatic histone-lysine N-methyltransferase 1	gga00310:Lysine degradation,
GT_EA606_A_87_P024630	-2.5551	0.0838978	ENSGALT00000009637	PDE8A	phosphodiesterase 8A	gga00230:Purine metabolism,
GT_EA606_A_87_P009020	-2.15709	0.0830939	NM_001199453	THBS1	thrombospondin 1	gga04350:TGF-beta signaling pathway,gga04510:Focal adhesion,gga04512:ECM-receptor interaction,
GT_EA606_A_87_P022556	-2.08917	0.00501974	NM_001199453	THBS1	thrombospondin 1	gga04350:TGF-beta signaling pathway,gga04510:Focal adhesion,gga04512:ECM-receptor interaction,
GT_EA606_A_87_P138918	-1.85248	0.154776	CR390342	MAP2K3	mitogen-activated protein kinase kinase 3	gga04010:MAPK signaling pathway,gga04620:Toll-like receptor signaling pathway,gga04912:GnRH signaling pathway,
GT_EA606_A_87_P035236	-1.35136	0.0047855	NM_204445	PDE6G	phosphodiesterase 6G, cGMP-specific, rod, gamma	gga00230:Purine metabolism,
GT_EA606_A_87_P035176	-2.75329	0.119669	NM_001012804	PRKCA	protein kinase C, alpha	gga04010:MAPK signaling pathway,gga04012:ErbB signaling pathway,gga04020:Calcium signaling pathway,gga04070:Phosphatidylinositol signaling system,gga04270:Vascular smooth muscle contraction,gga04310:Wnt signaling pathway,gga04370:VEGF signaling pathway,gg
GT_EA606_A_87_P057836	-1.27396	0.0246791	NM_001012804	PRKCA	protein kinase C, alpha	gga04010:MAPK signaling pathway,gga04012:ErbB signaling pathway,gga04020:Calcium signaling pathway,gga04070:Phosphatidylinositol signaling system,gga04270:Vascular smooth muscle contraction,gga04310:Wnt signaling pathway,gga04370:VEGF signaling pathway,gg
GT_EA606_A_87_P009509	-1.27058	0.00522478	NM_204117	NRG1	neuregulin 1	gga04012:ErbB signaling pathway,
GT_EA606_A_87_P130128	-1.8115	0.128076	AF045656	NRG1	neuregulin 1	gga04012:ErbB signaling pathway,
GT_EA606_A_87_P036426	-2.12089	0.103666	NM_001039301	DDB2	damage-specific DNA binding protein 2, 48kDa	gga03420:Nucleotide excision repair,gga04115:p53 signaling pathway,gga04120:Ubiquitin mediated proteolysis,
GT_EA606_A_87_P054751	-1.2913	0.03864	NM_001039301	DDB2	damage-specific DNA binding protein 2, 48kDa	gga03420:Nucleotide excision repair,gga04115:p53 signaling pathway,gga04120:Ubiquitin mediated proteolysis,
GT_EA606_A_87_P282998	-2.02818	0.10386	ENSGALT00000008683	AGL	amylo-1, 6-glucosidase, 4-alpha-glucanotransferase (glycogen debranching enzyme, glycogen storage disease type III)	gga00500:Starch and sucrose metabolism,
GT_EA606_A_87_P320237	-2.47436	0.0690287	ENSGALT00000008683	AGL	amylo-1, 6-glucosidase, 4-alpha-glucanotransferase (glycogen debranching enzyme, glycogen storage disease type III)	gga00500:Starch and sucrose metabolism,
GT_EA606_A_87_P121233	-2.0573	0.0332185	CR385731	PRKAG3	protein kinase, AMP-activated, gamma 3 non-catalytic subunit	gga04910:Insulin signaling pathway,gga04920:Adipocytokine signaling pathway,
GT_EA606_A_87_P255758	-4.02876	0.0486283	NM_001031258	PRKAG3	protein kinase, AMP-activated, gamma 3 non-catalytic subunit	gga04910:Insulin signaling pathway,gga04920:Adipocytokine signaling pathway,
GT_EA606_A_87_P057946	-3.36078	0.0659801	NM_205121	CHST3	carbohydrate (chondroitin 6) sulfotransferase 3	gga00532:Chondroitin sulfate biosynthesis,
GT_EA606_A_87_P296233	-1.20038	0.0295298	XM_423226	LIAS	lipoic acid synthetase	gga00785:Lipoic acid metabolism,
GT_EA606_A_87_P009160	-1.70091	0.00504059	ENSGALT00000034761	NEO1	neogenin	gga04514:Cell adhesion molecules (CAMs),
GT_EA606_A_87_P114998	-2.5125	0.114862	ENSGALT00000034761	NEO1	neogenin	gga04514:Cell adhesion molecules (CAMs),
GT_EA606_A_87_P146703	-2.04771	0.0033112	ENSGALT00000034761	NEO1	neogenin	gga04514:Cell adhesion molecules (CAMs),
GT_EA606_A_87_P065491	-3.04069	0.0480516	ENSGALT00000040272	DVL1	dishevelled, dsh homolog 1 (Drosophila)	gga04310:Wnt signaling pathway,gga04330:Notch signaling pathway,gga04916:Melanogenesis,
GT_EA606_A_87_P021863	-2.37285	0.115092	ENSGALT00000003754	NOTCH1	Notch homolog 1, translocation-associated (Drosophila)	gga04320:Dorso-ventral axis formation,gga04330:Notch signaling pathway,
GT_EA606_A_87_P068616	-3.1473	0.040297	ENSGALT00000003754	NOTCH1	Notch homolog 1, translocation-associated (Drosophila)	gga04320:Dorso-ventral axis formation,gga04330:Notch signaling pathway,
GT_EA606_A_87_P009167	-1.81201	0.042187	NM_204977	SEMA3A	sema domain, immunoglobulin domain (Ig), short basic domain, secreted, (semaphorin) 3A
GT_EA606_A_87_P009811	-2.4496	0.0267117	NM_001004391	CDH4	cadherin 4, type 1, R-cadherin (retinal)	gga04514:Cell adhesion molecules (CAMs),
GT_EA606_A_87_P059466	-1.85592	0.120803	NM_001004391	CDH4	cadherin 4, type 1, R-cadherin (retinal)	gga04514:Cell adhesion molecules (CAMs),
GT_EA606_A_87_P191663	-1.99754	0.0397826	ENSGALT00000012430	BMP7	bone morphogenetic protein 7	gga04340:Hedgehog signaling pathway,gga04350:TGF-beta signaling pathway,
GT_EA606_A_87_P058096	-1.61047	0.102172	NM_001146133	NGFR	nerve growth factor receptor (TNFR superfamily, member 16)	gga04060:Cytokine-cytokine receptor interaction,
GT_EA606_A_87_P096836	-2.55741	0.0838536	NM_205136	CTNNA2	catenin (cadherin-associated protein), alpha 2	gga04520:Adherens junction,gga04530:Tight junction,
GT_EA606_A_87_P016056	-2.52505	0.000810467	NM_001004493	NFASC	neurofascin	gga04514:Cell adhesion molecules (CAMs),
GT_EA606_A_87_P020443	-2.44099	0.0124757	NM_001004493	NFASC	neurofascin	gga04514:Cell adhesion molecules (CAMs),
GT_EA606_A_87_P171153	-2.56948	0.0598996	NM_001004493	NFASC	neurofascin	gga04514:Cell adhesion molecules (CAMs),
GT_EA606_A_87_P059046	-1.42076	0.112946	NM_204166	LAMB2	laminin, beta 2 (laminin S)	gga04510:Focal adhesion,gga04512:ECM-receptor interaction,
GT_EA606_A_87_P074061	-1.52988	0.0850105	NM_204166	LAMB2	laminin, beta 2 (laminin S)	gga04510:Focal adhesion,gga04512:ECM-receptor interaction,
GT_EA606_A_87_P130508	-3.19163	0.167219	NM_204166	LAMB2	laminin, beta 2 (laminin S)	gga04510:Focal adhesion,gga04512:ECM-receptor interaction,
GT_EA606_A_87_P037899	-2.61933	0.0171805	ENSGALT00000036251	CELSR3	cadherin, EGF LAG seven-pass G-type receptor 3 (flamingo homolog, Drosophila)
GT_EA606_A_87_P084881	-2.69467	0.042528	NM_204835	NUMB	numb homolog (Drosophila)	gga04330:Notch signaling pathway,
GT_EA606_A_87_P244088	-3.40892	0.180062	NM_204835	NUMB	numb homolog (Drosophila)	gga04330:Notch signaling pathway,
GT_EA606_A_87_P312457	-1.98079	0.0233079	NM_001199806	LAMA1	laminin, alpha 1; similar to Laminin alpha-1 chain precursor (Laminin A chain)	gga04510:Focal adhesion,gga04512:ECM-receptor interaction,
GT_EA606_A_87_P009300	-1.6952	0.0651919	NM_205497	EGFR	epidermal growth factor receptor (erythroblastic leukemia viral (v-erb-b) oncogene homolog, avian)	gga04010:MAPK signaling pathway,gga04012:ErbB signaling pathway,gga04020:Calcium signaling pathway,gga04060:Cytokine-cytokine receptor interaction,gga04144:Endocytosis,gga04320:Dorso-ventral axis formation,gga04510:Focal adhesion,gga04520:Adherens junctio
GT_EA606_A_87_P131588	-2.18115	0.0859748	NM_205477	MYH9	similar to Myosin-9 (Myosin heavy chain, nonmuscle IIa) (Nonmuscle myosin heavy chain IIa) (NMMHC II-a) (NMMHC-IIA) (Cellular myosin heavy chain, type A) (Nonmuscle myosin heavy chain-A) (NMMHC-A); myosin, heavy chain 9, non-muscle	gga04530:Tight junction,
GT_EA606_A_87_P186243	-2.03437	0.238642	NM_205477	MYH9	similar to Myosin-9 (Myosin heavy chain, nonmuscle IIa) (Nonmuscle myosin heavy chain IIa) (NMMHC II-a) (NMMHC-IIA) (Cellular myosin heavy chain, type A) (Nonmuscle myosin heavy chain-A) (NMMHC-A); myosin, heavy chain 9, non-muscle	gga04530:Tight junction,
GT_EA606_A_87_P307083	-2.85014	0.114307	NM_205477	MYH9	similar to Myosin-9 (Myosin heavy chain, nonmuscle IIa) (Nonmuscle myosin heavy chain IIa) (NMMHC II-a) (NMMHC-IIA) (Cellular myosin heavy chain, type A) (Nonmuscle myosin heavy chain-A) (NMMHC-A); myosin, heavy chain 9, non-muscle	gga04530:Tight junction,
GT_EA606_A_87_P312682	-2.98395	0.221896	NM_205477	MYH9	similar to Myosin-9 (Myosin heavy chain, nonmuscle IIa) (Nonmuscle myosin heavy chain IIa) (NMMHC II-a) (NMMHC-IIA) (Cellular myosin heavy chain, type A) (Nonmuscle myosin heavy chain-A) (NMMHC-A); myosin, heavy chain 9, non-muscle	gga04530:Tight junction,
GT_EA606_A_87_P037673	-1.99126	0.0215672	ENSGALT00000026542	ROCK2	Rho-associated, coiled-coil containing protein kinase 2	gga04270:Vascular smooth muscle contraction,gga04310:Wnt signaling pathway,gga04350:TGF-beta signaling pathway,gga04510:Focal adhesion,gga04810:Regulation of actin cytoskeleton,
GT_EA606_A_87_P125478	-2.43458	0.0106563	ENSGALT00000026542	ROCK2	Rho-associated, coiled-coil containing protein kinase 2	gga04270:Vascular smooth muscle contraction,gga04310:Wnt signaling pathway,gga04350:TGF-beta signaling pathway,gga04510:Focal adhesion,gga04810:Regulation of actin cytoskeleton,
GT_EA606_A_87_P035295	-1.89084	0.0255941	NM_204426	COL2A1	collagen, type II, alpha 1	gga04510:Focal adhesion,gga04512:ECM-receptor interaction,
GT_EA606_A_87_P055181	-2.15474	0.0174297	NM_204426	COL2A1	collagen, type II, alpha 1	gga04510:Focal adhesion,gga04512:ECM-receptor interaction,
GT_EA606_A_87_P130898	-4.5313	0.054504	NM_204426	COL2A1	collagen, type II, alpha 1	gga04510:Focal adhesion,gga04512:ECM-receptor interaction,
GT_EA606_A_87_P294113	-1.76542	0.0249728	NM_204426	COL2A1	collagen, type II, alpha 1	gga04510:Focal adhesion,gga04512:ECM-receptor interaction,
GT_EA606_A_87_P024202	-1.48576	0.104979	ENSGALT00000008322	COL11A1	collagen, type XI, alpha 1	gga04510:Focal adhesion,gga04512:ECM-receptor interaction,
GT_EA606_A_87_P078821	-2.18331	0.0164174	ENSGALT00000008322	COL11A1	collagen, type XI, alpha 1	gga04510:Focal adhesion,gga04512:ECM-receptor interaction,
GT_EA606_A_87_P008890	-1.44427	0.0397929	NM_205319	FGFR2	fibroblast growth factor receptor 2	gga04010:MAPK signaling pathway,gga04144:Endocytosis,gga04810:Regulation of actin cytoskeleton,
GT_EA606_A_87_P127978	-2.35924	0.170434	NM_205319	FGFR2	fibroblast growth factor receptor 2	gga04010:MAPK signaling pathway,gga04144:Endocytosis,gga04810:Regulation of actin cytoskeleton,
GT_EA606_A_87_P052861	-1.29548	0.026038	NM_204714	FGF18	fibroblast growth factor 18	gga04010:MAPK signaling pathway,gga04810:Regulation of actin cytoskeleton,
GT_EA606_A_87_P105493	-2.15246	0.139337	ENSGALT00000012839	SMO	smoothened homolog (Drosophila)	gga04340:Hedgehog signaling pathway,
GT_EA606_A_87_P254168	-1.93054	0.0952582	NM_204420	MMP2	matrix metallopeptidase 2 (gelatinase A, 72kDa gelatinase, 72kDa type IV collagenase)	gga04912:GnRH signaling pathway,
GT_EA606_A_87_P140673	-1.46171	0.0450931	NM_204491	AXIN2	axin 2	gga04310:Wnt signaling pathway,
GT_EA606_A_87_P325052	-3.56878	0.265494	NM_001001876	HSPG2	heparan sulfate proteoglycan 2	gga04512:ECM-receptor interaction,
GT_EA606_A_87_P059261	-2.38858	0.181225	NM_205428	TGFBR2	transforming growth factor, beta receptor II (70/80kDa)	gga04010:MAPK signaling pathway,gga04060:Cytokine-cytokine receptor interaction,gga04144:Endocytosis,gga04350:TGF-beta signaling pathway,gga04520:Adherens junction,
GT_EA606_A_87_P131548	-1.38468	0.0402826	NM_001079714	COL1A2	collagen, type I, alpha 2	gga04510:Focal adhesion,gga04512:ECM-receptor interaction,
GT_EA606_A_87_P191283	-1.53215	0.0317036	NM_001079714	COL1A2	collagen, type I, alpha 2	gga04510:Focal adhesion,gga04512:ECM-receptor interaction,
GT_EA606_A_87_P009327	-1.47636	0.0839479	NM_205476	ATP1A2	Na,K-ATPase alpha-2-subunit	gga04260:Cardiac muscle contraction,
GT_EA606_A_87_P283428	-3.5604	0.112893	NM_205476	ATP1A2	Na,K-ATPase alpha-2-subunit	gga04260:Cardiac muscle contraction,
GT_EA606_A_87_P058006	-2.23453	0.0172941	NM_204293	CACNA1B	calcium channel, voltage-dependent, N type, alpha 1B subunit	gga04010:MAPK signaling pathway,gga04020:Calcium signaling pathway,
GT_EA606_A_87_P068206	-3.13038	0.0422437	NM_204293	CACNA1B	calcium channel, voltage-dependent, N type, alpha 1B subunit	gga04010:MAPK signaling pathway,gga04020:Calcium signaling pathway,
GT_EA606_A_87_P037213	-2.13736	0.0614434	NM_205418	ACHE	acetylcholinesterase	gga00564:Glycerophospholipid metabolism,
GT_EA606_A_87_P059636	-1.46532	0.0873553	NM_205418	ACHE	acetylcholinesterase	gga00564:Glycerophospholipid metabolism,
GT_EA606_A_87_P132523	-2.0589	0.0591765	AJ698861	ACHE	acetylcholinesterase	gga00564:Glycerophospholipid metabolism,
GT_EA606_A_87_P055391	-2.25208	0.0279959	NM_204608	IL18	interleukin 18 (interferon-gamma-inducing factor)	gga04060:Cytokine-cytokine receptor interaction,gga04621:NOD-like receptor signaling pathway,gga04623:Cytosolic DNA-sensing pathway,
GT_EA606_A_87_P035112	-2.07323	0.0837084	NM_001001614	TGFA	transforming growth factor, alpha	gga04012:ErbB signaling pathway,
GT_EA606_A_87_P054381	-1.86138	0.050725	NM_205264	TP53	tumor protein p53	gga04010:MAPK signaling pathway,gga04110:Cell cycle,gga04115:p53 signaling pathway,gga04210:Apoptosis,gga04310:Wnt signaling pathway,
GT_EA606_A_87_P113573	-1.51412	0.0619001	BX930481	IGFBP3	insulin-like growth factor binding protein 3	gga04115:p53 signaling pathway,
GT_EA606_A_87_P105138	-1.77515	0.00654745	NM_205268	NOV	similar to cellular proto-oncogene protein Nov; nephroblastoma overexpressed gene
GT_EA606_A_87_P008704	-3.15662	0.212792	NM_204790	COL5A1	collagen, type V, alpha 1	gga04510:Focal adhesion,gga04512:ECM-receptor interaction,
GT_EA606_A_87_P310042	-1.8005	0.0541406	NM_204243	SEMA3C	sema domain, immunoglobulin domain (Ig), short basic domain, secreted, (semaphorin) 3C; similar to collapsin 3
GT_EA606_A_87_P116808	-1.51249	0.00759878	BX934531	ITGA4	integrin, alpha 4 (antigen CD49D, alpha 4 subunit of VLA-4 receptor)	gga04510:Focal adhesion,gga04512:ECM-receptor interaction,gga04514:Cell adhesion molecules (CAMs),gga04672:Intestinal immune network for IgA production,gga04810:Regulation of actin cytoskeleton,
GT_EA606_A_87_P194168	-2.20306	0.0179642	BX934531	ITGA4	integrin, alpha 4 (antigen CD49D, alpha 4 subunit of VLA-4 receptor)	gga04510:Focal adhesion,gga04512:ECM-receptor interaction,gga04514:Cell adhesion molecules (CAMs),gga04672:Intestinal immune network for IgA production,gga04810:Regulation of actin cytoskeleton,
GT_EA606_A_87_P037863	-1.81655	0.00924675	NM_205029	MITF	similar to Mitf; microphthalmia-associated transcription factor	gga04916:Melanogenesis,
GT_EA606_A_87_P013095	-1.4582	0.0679862	NM_204860	CD44	CD44 molecule (Indian blood group)	gga04512:ECM-receptor interaction,
GT_EA606_A_87_P054691	-1.95584	0.153265	NM_204572	TRPV1	transient receptor potential cation channel, subfamily V, member 1	gga04080:Neuroactive ligand-receptor interaction,
GT_EA606_A_87_P066841	-1.50502	0.00444187	NM_204961	NOS2	nitric oxide synthase 2, inducible	gga00330:Arginine and proline metabolism,gga04020:Calcium signaling pathway,
GT_EA606_A_87_P131068	-2.68627	0.0169222	NM_204961	NOS2	nitric oxide synthase 2, inducible	gga00330:Arginine and proline metabolism,gga04020:Calcium signaling pathway,
GT_EA606_A_87_P037698	-2.49954	0.123187	NM_001174059	ITPR1	inositol 1,4,5-triphosphate receptor, type 1	gga04020:Calcium signaling pathway,gga04070:Phosphatidylinositol signaling system,gga04114:Oocyte meiosis,gga04270:Vascular smooth muscle contraction,gga04540:Gap junction,gga04912:GnRH signaling pathway,
GT_EA606_A_87_P311867	-1.48215	0.0419554	NM_001012897	LRP5	low density lipoprotein receptor-related protein 5; similar to similar to low density lipoprotein receptor-related protein 5; low density lipoprotein receptor-related protein 7; osteoporosis pseudoglioma syndrome	gga04310:Wnt signaling pathway,
GT_EA606_A_87_P008740	-2.59403	0.17574	NM_001001465	BMPR2	bone morphogenetic protein receptor, type II (serine/threonine kinase)	gga04060:Cytokine-cytokine receptor interaction,gga04350:TGF-beta signaling pathway,
GT_EA606_A_87_P008693	-1.39884	0.0269779	NM_205327	FGF3	fibroblast growth factor 3 (murine mammary tumor virus integration site (v-int-2) oncogene homolog)	gga04010:MAPK signaling pathway,gga04810:Regulation of actin cytoskeleton,
GT_EA606_A_87_P058011	-1.83466	0.02005	NM_204319	POU1F1	POU domain, class 1, transcription factor 1 (Pit1, growth hormone factor 1)
GT_EA606_A_87_P100486	-3.46714	0.187552	ENSGALT00000026837	FZD3	frizzled homolog 3 (Drosophila)	gga04310:Wnt signaling pathway,gga04916:Melanogenesis,
GT_EA606_A_87_P143948	-3.00058	0.0277121	ENSGALT00000036602	FZD6	frizzled homolog 6 (Drosophila)	gga04310:Wnt signaling pathway,gga04916:Melanogenesis,
GT_EA606_A_87_P058506	-1.43171	0.0552431	NM_001030340	PPP3CB	protein phosphatase 3 (formerly 2B), catalytic subunit, beta isoform	gga04010:MAPK signaling pathway,gga04020:Calcium signaling pathway,gga04114:Oocyte meiosis,gga04210:Apoptosis,gga04310:Wnt signaling pathway,gga04370:VEGF signaling pathway,gga04650:Natural killer cell mediated cytotoxicity,
GT_EA606_A_87_P189908	-1.44411	0.0623018	NM_001030340	PPP3CB	protein phosphatase 3 (formerly 2B), catalytic subunit, beta isoform	gga04010:MAPK signaling pathway,gga04020:Calcium signaling pathway,gga04114:Oocyte meiosis,gga04210:Apoptosis,gga04310:Wnt signaling pathway,gga04370:VEGF signaling pathway,gga04650:Natural killer cell mediated cytotoxicity,
GT_EA606_A_87_P009806	-1.6901	0.00290618	NM_204413	NFKB2	nuclear factor of kappa light polypeptide gene enhancer in B-cells 2 (p49/p100)	gga04010:MAPK signaling pathway,
GT_EA606_A_87_P009081	-2.20131	0.209301	NM_204960	PTCH1	patched homolog 1 (Drosophila)	gga04340:Hedgehog signaling pathway,
GT_EA606_A_87_P052591	-4.69539	0.0260833	NM_204960	PTCH1	patched homolog 1 (Drosophila)	gga04340:Hedgehog signaling pathway,
GT_EA606_A_87_P035830	-1.4695	0.0534055	NM_001099357	TAP2	transporter 2, ATP-binding cassette, sub-family B (MDR/TAP)	gga02010:ABC transporters,
GT_EA606_A_87_P060211	-1.55267	0.0857438	NM_001099357	TAP2	transporter 2, ATP-binding cassette, sub-family B (MDR/TAP)	gga02010:ABC transporters,
GT_EA606_A_87_P037196	-2.13096	0.0642898	NM_001031401	HCLS1	hematopoietic cell-specific Lyn substrate 1	gga04530:Tight junction,
GT_EA606_A_87_P037522	-2.47839	0.019843	NM_204871	IL6ST	interleukin 6 signal transducer (gp130, oncostatin M receptor)	gga04060:Cytokine-cytokine receptor interaction,gga04630:Jak-STAT signaling pathway,
GT_EA606_A_87_P071976	-3.63164	0.0943398	NM_204944	AXIN1	axin 1	gga04310:Wnt signaling pathway,
GT_EA606_A_87_P056831	-1.37097	0.0466732	NM_001012904	CHUK	conserved helix-loop-helix ubiquitous kinase	gga04010:MAPK signaling pathway,gga04210:Apoptosis,gga04620:Toll-like receptor signaling pathway,gga04621:NOD-like receptor signaling pathway,gga04622:RIG-I-like receptor signaling pathway,gga04623:Cytosolic DNA-sensing pathway,gga04920:Adipocytokine sign
GT_EA606_A_87_P018282	-2.68522	0.172643	NM_001252033	NOTCH2	Notch homolog 2 (Drosophila)	gga04320:Dorso-ventral axis formation,gga04330:Notch signaling pathway,
GT_EA606_A_87_P078386	-2.74194	0.256465	NM_001252033	NOTCH2	Notch homolog 2 (Drosophila)	gga04320:Dorso-ventral axis formation,gga04330:Notch signaling pathway,
GT_EA606_A_87_P037517	-2.74843	0.259607	NM_001079473	SLC8A1	similar to Na+/Ca2+ exchanger; solute carrier family 8 (sodium/calcium exchanger), member 1	gga04020:Calcium signaling pathway,
GT_EA606_A_87_P009216	-3.31465	0.0477534	NM_001031570	IRS-1	insulin receptor substrate 1	gga04910:Insulin signaling pathway,gga04920:Adipocytokine signaling pathway,
GT_EA606_A_87_P081911	-1.42817	0.0836765	NM_001012914	STAT1	signal transducer and activator of transcription 1, 91kDa; signal transducer and activator of transcription 4	gga04620:Toll-like receptor signaling pathway,gga04630:Jak-STAT signaling pathway,
GT_EA606_A_87_P035252	-1.38379	0.0672999	NM_204344	CACNB4	calcium channel, voltage-dependent, beta 4 subunit	gga04010:MAPK signaling pathway,gga04260:Cardiac muscle contraction,
GT_EA606_A_87_P058651	-2.8013	0.139309	NM_001031338	BF2	major histocompatibility complex class I glycoprotein; HLA-G histocompatibility antigen, class I, G	gga04144:Endocytosis,gga04514:Cell adhesion molecules (CAMs),
GT_EA606_A_87_P088781	-1.68776	0.0563053	NM_205289	ITGA6	integrin, alpha 6; similar to integrin alpha 6 subunit	gga04510:Focal adhesion,gga04512:ECM-receptor interaction,gga04514:Cell adhesion molecules (CAMs),gga04810:Regulation of actin cytoskeleton,
GT_EA606_A_87_P057386	-2.69738	0.175975	NM_001044683	BF1	MHC class I antigen B-F minor heavy chain	gga04144:Endocytosis,gga04514:Cell adhesion molecules (CAMs),
GT_EA606_A_87_P130067	-1.93968	0.158571	NM_001044683	BF1	MHC class I antigen B-F minor heavy chain	gga04144:Endocytosis,gga04514:Cell adhesion molecules (CAMs),
GT_EA606_A_87_P057471	-2.75488	0.115879	NM_001080867	MR1	similar to MHC Rfp-Y class I alpha chain; major histocompatibility complex, class I-related	gga04144:Endocytosis,gga04514:Cell adhesion molecules (CAMs),
GT_EA606_A_87_P060271	-1.50201	0.0175074	NM_001080867	MR1	similar to MHC Rfp-Y class I alpha chain; major histocompatibility complex, class I-related	gga04144:Endocytosis,gga04514:Cell adhesion molecules (CAMs),
GT_EA606_A_87_P017700	-2.76781	0.0520708	CR353830	FN1	fibronectin 1	gga04510:Focal adhesion,gga04512:ECM-receptor interaction,gga04810:Regulation of actin cytoskeleton,
GT_EA606_A_87_P081766	-2.03995	0.158672	NM_001198712	FN1	fibronectin 1	gga04510:Focal adhesion,gga04512:ECM-receptor interaction,gga04810:Regulation of actin cytoskeleton,
GT_EA606_A_87_P115003	-3.38731	0.231337	NM_001198712	FN1	fibronectin 1	gga04510:Focal adhesion,gga04512:ECM-receptor interaction,gga04810:Regulation of actin cytoskeleton,
GT_EA606_A_87_P119463	-2.12893	0.0246211	CR353091	NCK2	NCK adaptor protein 2	gga04012:ErbB signaling pathway,
GT_EA606_A_87_P229913	-1.64367	0.0893321	NM_001030814	NCK2	NCK adaptor protein 2	gga04012:ErbB signaling pathway,
GT_EA606_A_87_P279133	-2.1584	0.118369	NM_204291	P2RX4	purinergic receptor P2X, ligand-gated ion channel, 4	gga04020:Calcium signaling pathway,gga04080:Neuroactive ligand-receptor interaction,
GT_EA606_A_87_P124013	-1.16566	0.00420401	CR389525	CALD1	caldesmon 1	gga04270:Vascular smooth muscle contraction,
GT_EA606_A_87_P009245	-1.4363	0.265954	NM_001031098	POMC	proopiomelanocortin (adrenocorticotropin/ beta-lipotropin/ alpha-melanocyte stimulating hormone/ beta-melanocyte stimulating hormone/ beta-endorphin)	gga04916:Melanogenesis,gga04920:Adipocytokine signaling pathway,
GT_EA606_A_87_P009275	-1.07536	0.010248	NM_205527	AGRN	agrin	gga04512:ECM-receptor interaction,
GT_EA606_A_87_P131658	-2.42489	0.17138	ENSGALT00000040179	AGRN	agrin	gga04512:ECM-receptor interaction,
GT_EA606_A_87_P035092	-1.15344	0.00306227	NM_001004409	TRPC1	transient receptor potential cation channel, subfamily C, member 1	gga04020:Calcium signaling pathway,
GT_EA606_A_87_P077351	-1.40818	0.0176378	NM_001004409	TRPC1	transient receptor potential cation channel, subfamily C, member 1	gga04020:Calcium signaling pathway,
GT_EA606_A_87_P009054	-2.34794	0.072278	NM_001001774	GRIA1	glutamate receptor, ionotropic, AMPA 1	gga04080:Neuroactive ligand-receptor interaction,
GT_EA606_A_87_P010891	-1.80816	0.00884699	NM_001198975	NRXN1	neurexin 1	gga04514:Cell adhesion molecules (CAMs),
GT_EA606_A_87_P036500	-1.68212	0.00633603	NM_001031588	BRD4	bromodomain containing 4	gga00030:Pentose phosphate pathway,
GT_EA606_A_87_P024320	-6.109	0.283119	ENSGALT00000040047	H6PD	hexose-6-phosphate dehydrogenase (glucose 1-dehydrogenase)	gga00030:Pentose phosphate pathway,
GT_EA606_A_87_P037577	-2.62818	0.0789718	NM_204346	PCX	pyruvate carboxylase	gga00020:Citrate cycle (TCA cycle),gga00620:Pyruvate metabolism,
GT_EA606_A_87_P312882	-3.00012	0.0890433	NM_001004410	PIK3CA	similar to phosphoinositide 3-kinase catalytic subunit; similar to Phosphatidylinositol 3-kinase, catalytic, alpha polypeptide; phosphoinositide-3-kinase, catalytic, alpha polypeptide	gga00562:Inositol phosphate metabolism,gga04012:ErbB signaling pathway,gga04070:Phosphatidylinositol signaling system,gga04150:mTOR signaling pathway,gga04210:Apoptosis,gga04370:VEGF signaling pathway,gga04510:Focal adhesion,gga04620:Toll-like receptor si
GT_EA606_A_87_P008906	-1.15281	0.0489574	NM_205222	INS	insulin	gga04114:Oocyte meiosis,gga04140:Regulation of autophagy,gga04150:mTOR signaling pathway,gga04810:Regulation of actin cytoskeleton,gga04910:Insulin signaling pathway,gga04914:Progesterone-mediated oocyte maturation,
GT_EA606_A_87_P067281	-1.07756	0.124152	ENSGALT00000003634	GALK1	galactokinase 1	gga00052:Galactose metabolism,gga00520:Amino sugar and nucleotide sugar metabolism,
GT_EA606_A_87_P143533	-1.60119	0.161978	NM_001031059	NANP	N-acetylneuraminic acid phosphatase	gga00520:Amino sugar and nucleotide sugar metabolism,
GT_EA606_A_87_P037520	-1.94039	0.0844661	NM_204881	ITPKA	inositol 1,4,5-trisphosphate 3-kinase A	gga00562:Inositol phosphate metabolism,gga04020:Calcium signaling pathway,gga04070:Phosphatidylinositol signaling system,
GT_EA606_A_87_P084756	-1.86128	0.135565	NM_204881	ITPKA	inositol 1,4,5-trisphosphate 3-kinase A	gga00562:Inositol phosphate metabolism,gga04020:Calcium signaling pathway,gga04070:Phosphatidylinositol signaling system,
GT_EA606_A_87_P024327	-1.71812	0.0458733	ENSGALT00000020486	GPD2	glycerol-3-phosphate dehydrogenase 2 (mitochondrial)	gga00564:Glycerophospholipid metabolism,
GT_EA606_A_87_P210108	-1.65747	0.0577773	ENSGALT00000020486	GPD2	glycerol-3-phosphate dehydrogenase 2 (mitochondrial)	gga00564:Glycerophospholipid metabolism,
GT_EA606_A_87_P058036	-1.45871	0.034396	NM_205008	ST8SIA1	ST8 alpha-N-acetyl-neuraminide alpha-2,8-sialyltransferase 1	gga00601:Glycosphingolipid biosynthesis,gga00603:Glycosphingolipid biosynthesis,gga00604:Glycosphingolipid biosynthesis,
GT_EA606_A_87_P036408	-1.17291	0.0203125	NM_204480	ST3GAL2	ST3 beta-galactoside alpha-2,3-sialyltransferase 2	gga00512:O-Glycan biosynthesis,gga00533:Keratan sulfate biosynthesis,gga00603:Glycosphingolipid biosynthesis,gga00604:Glycosphingolipid biosynthesis,
GT_EA606_A_87_P008834	-1.73575	0.132721	NM_205241	ST6GAL1	ST6 beta-galactosamide alpha-2,6-sialyltranferase 1	gga00510:N-Glycan biosynthesis,
GT_EA606_A_87_P008829	-1.57751	0.0200908	NM_205233	ST6GALNAC2	ST6 (alpha-N-acetyl-neuraminyl-2,3-beta-galactosyl-1,3)-N-acetylgalactosaminide alpha-2,6-sialyltransferase 2
GT_EA606_A_87_P021357	-1.64422	0.220116	ENSGALT00000008495	ST6GALNAC6	ST6 (alpha-N-acetyl-neuraminyl-2,3-beta-galactosyl-1,3)-N-acetylgalactosaminide alpha-2,6-sialyltransferase 6
GT_EA606_A_87_P053206	-4.79761	0.0530134	NM_001001747	ST8SIA5	ST8 alpha-N-acetyl-neuraminide alpha-2,8-sialyltransferase 5	gga00604:Glycosphingolipid biosynthesis,
GT_EA606_A_87_P061206	-1.913	0.173753	NM_001030882	GFPT1	glutamine-fructose-6-phosphate transaminase 1	gga00250:Alanine, aspartate and glutamate metabolism,gga00520:Amino sugar and nucleotide sugar metabolism,
GT_EA606_A_87_P022413	-1.95002	0.0208948	NM_001001528	AMY1A	amylase, alpha 1A; salivary	gga00500:Starch and sucrose metabolism,
GT_EA606_A_87_P036907	-2.0088	0.0246803	NM_001030992	GLB1	galactosidase, beta 1	gga00052:Galactose metabolism,gga00511:Other glycan degradation,gga00531:Glycosaminoglycan degradation,gga00600:Sphingolipid metabolism,gga00604:Glycosphingolipid biosynthesis,gga04142:Lysosome,
GT_EA606_A_87_P014641	-3.7852	0.0400624	NM_001111346	LCT	lactase	gga00052:Galactose metabolism,
GT_EA606_A_87_P083111	-1.61148	0.0313339	NM_001111346	LCT	lactase	gga00052:Galactose metabolism,
GT_EA606_A_87_P145243	-1.23827	0.0241679	ENSGALT00000010002	LSS	lanosterol synthase (2,3-oxidosqualene-lanosterol cyclase)	gga00100:Steroid biosynthesis,
GT_EA606_A_87_P035324	-2.15556	0.205428	ENSGALT00000012830	DLAT	dihydrolipoamide S-acetyltransferase (E2 component of pyruvate dehydrogenase complex)	gga00010:Glycolysis / Gluconeogenesis,gga00020:Citrate cycle (TCA cycle),gga00620:Pyruvate metabolism,
GT_EA606_A_87_P021647	-1.28563	0.00251797	ENSGALT00000020890	FARS2	phenylalanyl-tRNA synthetase 2, mitochondrial	gga00970:Aminoacyl-tRNA biosynthesis,
GT_EA606_A_87_P126278	-1.62631	0.0181476	NM_001006398	EPRS	glutamyl-prolyl-tRNA synthetase	gga00860:Porphyrin and chlorophyll metabolism,gga00970:Aminoacyl-tRNA biosynthesis,
GT_EA606_A_87_P233188	-1.48045	0.0300427	NM_001006398	EPRS	glutamyl-prolyl-tRNA synthetase	gga00860:Porphyrin and chlorophyll metabolism,gga00970:Aminoacyl-tRNA biosynthesis,
GT_EA606_A_87_P056926	-1.03732	0.0226537	NM_001006314	YARS	tyrosyl-tRNA synthetase	gga00970:Aminoacyl-tRNA biosynthesis,
GT_EA606_A_87_P009377	-2.95416	0.196626	NM_001198735	P4HA1	prolyl 4-hydroxylase, alpha polypeptide I	gga00330:Arginine and proline metabolism,
GT_EA606_A_87_P009202	-2.81606	0.156031	NM_205493	GLUL	glutamate-ammonia ligase (glutamine synthetase)	gga00250:Alanine, aspartate and glutamate metabolism,gga00330:Arginine and proline metabolism,gga00910:Nitrogen metabolism,
GT_EA606_A_87_P115028	-3.30234	0.0833898	ENSGALT00000038351	GLDC	glycine dehydrogenase (decarboxylating)	gga00260:Glycine, serine and threonine metabolism,
GT_EA606_A_87_P221373	-2.78597	0.114162	NM_205505	ACACA	acetyl-Coenzyme A carboxylase alpha	gga00061:Fatty acid biosynthesis,gga00620:Pyruvate metabolism,gga00640:Propanoate metabolism,gga04910:Insulin signaling pathway,
GT_EA606_A_87_P059821	-1.98984	0.0579699	ENSGALT00000029098	ND2	NADH-ubiquinone oxidoreductase chain 2	gga00190:Oxidative phosphorylation,
GT_EA606_A_87_P284148	-2.03569	0.0432775	ENSGALT00000029098	ND2	NADH-ubiquinone oxidoreductase chain 2	gga00190:Oxidative phosphorylation,
GT_EA606_A_87_P008416	-1.88014	0.0169702	ENSGALT00000029084	ND4	NADH-ubiquinone oxidoreductase chain 4	gga00190:Oxidative phosphorylation,
GT_EA606_A_87_P288558	-2.27911	0.00447653	ENSGALT00000029084	ND4	NADH-ubiquinone oxidoreductase chain 4	gga00190:Oxidative phosphorylation,
GT_EA606_A_87_P008930	-1.98646	0.0154927	ENSGALT00000029087	COX3	Cytochrome c oxidase subunit 3	gga00190:Oxidative phosphorylation,gga04260:Cardiac muscle contraction,
GT_EA606_A_87_P286078	-1.37075	0.0152462	ENSGALT00000029087	COX3	Cytochrome c oxidase subunit 3	gga00190:Oxidative phosphorylation,gga04260:Cardiac muscle contraction,
GT_EA606_A_87_P008982	-1.89277	0.021275	ENSGALT00000029088	ATP6	ATP synthase subunit a	gga00190:Oxidative phosphorylation,
GT_EA606_A_87_P131539	-1.85679	0.0353274	ENSGALT00000029088	ATP6	ATP synthase subunit a	gga00190:Oxidative phosphorylation,
GT_EA606_A_87_P249063	-1.94886	0.123922	NM_204974	ATP6V1A	ATPase, H+ transporting, lysosomal 70kDa, V1 subunit A; similar to A2 isoform of vacuolar H+-ATPase subunit A	gga00190:Oxidative phosphorylation,
GT_EA606_A_87_P187498	-2.0415	0.00014427	XM_419951	ATP6V1C2	ATPase, H+ transporting, lysosomal 42kDa, V1 subunit C2	gga00190:Oxidative phosphorylation,
GT_EA606_A_87_P059831	-2.35731	0.00968677	ENSGALT00000035259	ATP8	ATP synthase protein 8	gga00190:Oxidative phosphorylation,
GT_EA606_A_87_P059841	-3.00566	0.02534	ENSGALT00000035261	ND4L	NADH-ubiquinone oxidoreductase chain 4L	gga00190:Oxidative phosphorylation,
GT_EA606_A_87_P059846	-1.73584	0.00134201	ENSGALT00000029081	ND5	NADH-ubiquinone oxidoreductase chain 5	gga00190:Oxidative phosphorylation,
GT_EA606_A_87_P193268	-1.87031	0.0692875	ENSGALT00000029081	ND5	NADH-ubiquinone oxidoreductase chain 5	gga00190:Oxidative phosphorylation,
GT_EA606_A_87_P280238	-2.42749	0.00335129	ENSGALT00000029081	ND5	NADH-ubiquinone oxidoreductase chain 5	gga00190:Oxidative phosphorylation,
GT_EA606_A_87_P059826	-2.4322	0.0195258	ENSGALT00000029093	COX1	Cytochrome c oxidase subunit 1	gga00190:Oxidative phosphorylation,gga04260:Cardiac muscle contraction,
GT_EA606_A_87_P229128	-2.77391	0.00264432	ENSGALT00000029093	COX1	Cytochrome c oxidase subunit 1	gga00190:Oxidative phosphorylation,gga04260:Cardiac muscle contraction,
GT_EA606_A_87_P239488	-2.70489	0.00719011	ENSGALT00000029093	COX1	Cytochrome c oxidase subunit 1	gga00190:Oxidative phosphorylation,gga04260:Cardiac muscle contraction,
GT_EA606_A_87_P250749	-2.62226	0.035483	ENSGALT00000029093	COX1	Cytochrome c oxidase subunit 1	gga00190:Oxidative phosphorylation,gga04260:Cardiac muscle contraction,
GT_EA606_A_87_P257478	-2.43957	0.038796	ENSGALT00000029093	COX1	Cytochrome c oxidase subunit 1	gga00190:Oxidative phosphorylation,gga04260:Cardiac muscle contraction,
GT_EA606_A_87_P261433	-2.75959	0.0173561	ENSGALT00000029093	COX1	Cytochrome c oxidase subunit 1	gga00190:Oxidative phosphorylation,gga04260:Cardiac muscle contraction,
GT_EA606_A_87_P297794	-2.22528	0.0264981	ENSGALT00000029093	COX1	Cytochrome c oxidase subunit 1	gga00190:Oxidative phosphorylation,gga04260:Cardiac muscle contraction,
GT_EA606_A_87_P299483	-2.55655	0.0540515	ENSGALT00000029093	COX1	Cytochrome c oxidase subunit 1	gga00190:Oxidative phosphorylation,gga04260:Cardiac muscle contraction,
GT_EA606_A_87_P004138	-2.04965	0.0266308	ENSGALT00000029090	COX2	Cytochrome c oxidase subunit 2	gga00190:Oxidative phosphorylation,gga04260:Cardiac muscle contraction,
GT_EA606_A_87_P264189	-2.0876	0.00443569	ENSGALT00000029090	COX2	Cytochrome c oxidase subunit 2	gga00190:Oxidative phosphorylation,gga04260:Cardiac muscle contraction,
GT_EA606_A_87_P278163	-1.43894	0.032774	ENSGALT00000029090	COX2	Cytochrome c oxidase subunit 2	gga00190:Oxidative phosphorylation,gga04260:Cardiac muscle contraction,
GT_EA606_A_87_P008373	-2.2882	0.024426	ENSGALT00000029080	CYTB	Cytochrome b	gga00190:Oxidative phosphorylation,gga04260:Cardiac muscle contraction,
GT_EA606_A_87_P255843	-2.25863	0.0206455	ENSGALT00000029080	CYTB	Cytochrome b	gga00190:Oxidative phosphorylation,gga04260:Cardiac muscle contraction,
GT_EA606_A_87_P262855	-1.75171	0.00308852	ENSGALT00000029080	CYTB	Cytochrome b	gga00190:Oxidative phosphorylation,gga04260:Cardiac muscle contraction,
GT_EA606_A_87_P266293	-1.79196	0.0126031	ENSGALT00000029080	CYTB	Cytochrome b	gga00190:Oxidative phosphorylation,gga04260:Cardiac muscle contraction,
GT_EA606_A_87_P059816	-1.82918	0.00966609	ENSGALT00000029102	ND1	NADH-ubiquinone oxidoreductase chain 1	gga00190:Oxidative phosphorylation,
GT_EA606_A_87_P230388	-1.97838	0.013367	ENSGALT00000029102	ND1	NADH-ubiquinone oxidoreductase chain 1	gga00190:Oxidative phosphorylation,
GT_EA606_A_87_P059836	-1.79623	0.0235209	ENSGALT00000029086	ND3	NADH-ubiquinone oxidoreductase chain 3	gga00190:Oxidative phosphorylation,
GT_EA606_A_87_P292708	-2.94101	0.0436588	ENSGALT00000029086	ND3	NADH-ubiquinone oxidoreductase chain 3	gga00190:Oxidative phosphorylation,
GT_EA606_A_87_P004142	-1.6063	0.00746946	ENSGALT00000029077	ND6	NADH-ubiquinone oxidoreductase chain 6	gga00190:Oxidative phosphorylation,
GT_EA606_A_87_P133383	-1.71742	0.00109091	ENSGALT00000029077	ND6	NADH-ubiquinone oxidoreductase chain 6	gga00190:Oxidative phosphorylation,
GT_EA606_A_87_P054771	-3.26788	0.00887728	NM_001037826	NR3C1	nuclear receptor subfamily 3, group C, member 1 (glucocorticoid receptor)	gga04080:Neuroactive ligand-receptor interaction,
GT_EA606_A_87_P073326	-2.71543	0.172728	NM_001037826	NR3C1	nuclear receptor subfamily 3, group C, member 1 (glucocorticoid receptor)	gga04080:Neuroactive ligand-receptor interaction,
GT_EA606_A_87_P073331	-2.08819	0.0954044	NM_001037826	NR3C1	nuclear receptor subfamily 3, group C, member 1 (glucocorticoid receptor)	gga04080:Neuroactive ligand-receptor interaction,
GT_EA606_A_87_P140378	-2.11296	0.117004	NM_001037826	NR3C1	nuclear receptor subfamily 3, group C, member 1 (glucocorticoid receptor)	gga04080:Neuroactive ligand-receptor interaction,
GT_EA606_A_87_P024769	-1.32216	0.0356648	NM_001199588	AMPD3	adenosine monophosphate deaminase (isoform E)	gga00230:Purine metabolism,
GT_EA606_A_87_P017125	-1.60602	0.0233954	NM_001204761	NME1	non-metastatic cells 1, protein (NM23A) expressed in	gga00230:Purine metabolism,gga00240:Pyrimidine metabolism,
GT_EA606_A_87_P305553	-1.58481	0.114839	NM_001204761	NME1	non-metastatic cells 1, protein (NM23A) expressed in	gga00230:Purine metabolism,gga00240:Pyrimidine metabolism,
GT_EA606_A_87_P009379	-3.21507	0.166457	NM_205519	ATP2A1	ATPase, Ca++ transporting, cardiac muscle, fast twitch 1	gga04020:Calcium signaling pathway,
GT_EA606_A_87_P226313	-1.96555	0.00913131	NM_205519	ATP2A1	ATPase, Ca++ transporting, cardiac muscle, fast twitch 1	gga04020:Calcium signaling pathway,
GT_EA606_A_87_P245263	-5.18502	0.0901733	NM_205519	ATP2A1	ATPase, Ca++ transporting, cardiac muscle, fast twitch 1	gga04020:Calcium signaling pathway,
GT_EA606_A_87_P009665	-1.81459	0.14351	NM_001044651	ATP1B4	ATPase, (Na+)/K+ transporting, beta 4 polypeptide	gga04260:Cardiac muscle contraction,
GT_EA606_A_87_P027940	-1.92362	0.0950723	NM_001168002	ATP2B1	ATPase, Ca++ transporting, plasma membrane 1	gga04020:Calcium signaling pathway,
GT_EA606_A_87_P023371	-2.91342	0.0876106	NM_001146044	CDA	similar to cytidine deaminase; CDD; cytidine deaminase	gga00240:Pyrimidine metabolism,gga00983:Drug metabolism,
GT_EA606_A_87_P036560	-1.57981	0.003192	NM_001006181	TOP3B	topoisomerase (DNA) III beta	gga03440:Homologous recombination,
GT_EA606_A_87_P114788	-1.8688	0.0714667	NM_001006181	TOP3B	topoisomerase (DNA) III beta	gga03440:Homologous recombination,
GT_EA606_A_87_P118368	-2.93503	0.0839805	NM_001006215	LIG3	ligase III, DNA, ATP-dependent	gga03410:Base excision repair,
GT_EA606_A_87_P114973	-3.77022	0.0903079	NM_001006456	RFC1	similar to replication factor C (activator 1) 1, 145kDa; replication factor C (activator 1) 1, 145kDa; similar to replication factor C large subunit	gga03030:DNA replication,gga03420:Nucleotide excision repair,gga03430:Mismatch repair,
GT_EA606_A_87_P016782	-4.83079	0.0423093	CR385980	GTF2H5	general transcription factor IIH, polypeptide 5	gga03420:Nucleotide excision repair,
GT_EA606_A_87_P054766	-1.34027	0.0517032	NM_204216	DDB1	damage-specific DNA binding protein 1, 127kDa; similar to damaged-DNA binding protein DDB p127 subunit; similar to UV-damaged DNA-binding protein	gga03420:Nucleotide excision repair,gga04120:Ubiquitin mediated proteolysis,
GT_EA606_A_87_P024494	-2.11382	0.0214494	ENSGALT00000010987	RAD50	RAD50 homolog (S. cerevisiae)	gga03440:Homologous recombination,gga03450:Non-homologous end-joining,
GT_EA606_A_87_P056876	-1.90052	0.0283796	NM_001024832	DNMT3A	DNA (cytosine-5-)-methyltransferase 3 alpha	gga00270:Cysteine and methionine metabolism,
GT_EA606_A_87_P311407	-2.53697	0.204266	NM_206952	DNMT1	DNA (cytosine-5-)-methyltransferase 1	gga00270:Cysteine and methionine metabolism,
GT_EA606_A_87_P110968	-1.2564	0.106774	NM_204419	RB1	retinoblastoma 1 (including osteosarcoma)	gga04110:Cell cycle,
GT_EA606_A_87_P110973	-3.24923	0.000552743	NM_204419	RB1	retinoblastoma 1 (including osteosarcoma)	gga04110:Cell cycle,
GT_EA606_A_87_P053891	-1.63433	0.0359609	NM_001098853	TBPL2	TATA box binding protein like 2	gga03022:Basal transcription factors,
GT_EA606_A_87_P074986	-2.28721	0.158868	ENSGALT00000007858	LOC415780	similar to TBP-associated factor	gga03022:Basal transcription factors,
GT_EA606_A_87_P051536	-1.48701	0.0872031	NM_001030894	TAF12	TAF12 RNA polymerase II, TATA box binding protein (TBP)-associated factor, 20kDa	gga03022:Basal transcription factors,
GT_EA606_A_87_P009185	-1.45682	0.0171087	S72435	RXRG	retinoid X receptor, gamma	gga03320:PPAR signaling pathway,gga04920:Adipocytokine signaling pathway,
GT_EA606_A_87_P090046	-2.61433	0.0012292	NM_001031386	CIR1	CBF1 interacting corepressor	gga04330:Notch signaling pathway,
GT_EA606_A_87_P008885	-2.28107	0.0332405	NM_001252221	THRB	thyroid hormone receptor beta	gga04080:Neuroactive ligand-receptor interaction,
GT_EA606_A_87_P116109	-1.59686	0.0293677	BX933575	POLR1A	polymerase (RNA) I polypeptide A, 194kDa; similar to RNA polymerase I large subunit	gga00230:Purine metabolism,gga00240:Pyrimidine metabolism,gga03020:RNA polymerase,
GT_EA606_A_87_P034690	-1.74612	0.0446422	NM_001199684	RBM25	RNA binding motif protein 25	gga03040:Spliceosome,
GT_EA606_A_87_P021611	-1.76277	0.00273613	ENSGALT00000019185	WBP11	WW domain binding protein 11	gga03040:Spliceosome,
GT_EA606_A_87_P106868	-3.54288	0.0616305	ENSGALT00000019185	WBP11	WW domain binding protein 11	gga03040:Spliceosome,
GT_EA606_A_87_P105913	-1.67274	0.063001	NM_001030728	NAMPT	nicotinamide phosphoribosyltransferase	gga00760:Nicotinate and nicotinamide metabolism,
GT_EA606_A_87_P056156	-3.11391	0.0355323	NM_204631	ADCY5	adenylate cyclase 5	gga00230:Purine metabolism,gga04114:Oocyte meiosis,gga04270:Vascular smooth muscle contraction,gga04540:Gap junction,gga04912:GnRH signaling pathway,gga04914:Progesterone-mediated oocyte maturation,gga04916:Melanogenesis,
GT_EA606_A_87_P082906	-2.42115	0.0779212	NM_204631	ADCY5	adenylate cyclase 5	gga00230:Purine metabolism,gga04114:Oocyte meiosis,gga04270:Vascular smooth muscle contraction,gga04540:Gap junction,gga04912:GnRH signaling pathway,gga04914:Progesterone-mediated oocyte maturation,gga04916:Melanogenesis,
GT_EA606_A_87_P226148	-1.663	0.0356674	ENSGALT00000006051	NT5C1A	5'-nucleotidase, cytosolic IA	gga00230:Purine metabolism,gga00240:Pyrimidine metabolism,gga00760:Nicotinate and nicotinamide metabolism,
GT_EA606_A_87_P054486	-1.92398	0.021128	NM_001030345	SSTR2	somatostatin receptor 2	gga04080:Neuroactive ligand-receptor interaction,
GT_EA606_A_87_P028640	-1.62513	0.142167	ENSGALT00000012587	CREBBP	CREB binding protein (Rubinstein-Taybi syndrome)	gga04110:Cell cycle,gga04310:Wnt signaling pathway,gga04330:Notch signaling pathway,gga04350:TGF-beta signaling pathway,gga04520:Adherens junction,gga04630:Jak-STAT signaling pathway,gga04916:Melanogenesis,
GT_EA606_A_87_P249843	-1.88116	0.0671638	ENSGALT00000012587	CREBBP	CREB binding protein (Rubinstein-Taybi syndrome)	gga04110:Cell cycle,gga04310:Wnt signaling pathway,gga04330:Notch signaling pathway,gga04350:TGF-beta signaling pathway,gga04520:Adherens junction,gga04630:Jak-STAT signaling pathway,gga04916:Melanogenesis,
GT_EA606_A_87_P009798	-1.79906	0.413836	ENSGALT00000001132	SETDB1	SET domain, bifurcated 1	gga00310:Lysine degradation,
GT_EA606_A_87_P020654	-2.18713	0.113117	XM_423391	SETDB1	SET domain, bifurcated 1	gga00310:Lysine degradation,
GT_EA606_A_87_P061136	-2.21881	0.171002	ENSGALT00000040574	SETDB1	SET domain, bifurcated 1	gga00310:Lysine degradation,
GT_EA606_A_87_P250548	-1.77096	0.358743	ENSGALT00000001132	SETDB1	SET domain, bifurcated 1	gga00310:Lysine degradation,
GT_EA606_A_87_P024344	-2.79496	0.0258399	ENSGALT00000001900	CREB3L3	cAMP responsive element binding protein 3-like 3	gga04916:Melanogenesis,
GT_EA606_A_87_P039939	-1.21671	0.0598248	ENSGALT00000020689	E2F3	E2F transcription factor 3	gga04110:Cell cycle,
GT_EA606_A_87_P012825	-2.23176	0.175184	ENSGALT00000005367	NFATC3	nuclear factor of activated T-cells, cytoplasmic, calcineurin-dependent 3	gga04310:Wnt signaling pathway,gga04370:VEGF signaling pathway,gga04650:Natural killer cell mediated cytotoxicity,
GT_EA606_A_87_P296543	-2.41952	0.155824	ENSGALT00000005367	NFATC3	nuclear factor of activated T-cells, cytoplasmic, calcineurin-dependent 3	gga04310:Wnt signaling pathway,gga04370:VEGF signaling pathway,gga04650:Natural killer cell mediated cytotoxicity,
GT_EA606_A_87_P070286	-1.75837	0.0129449	ENSGALT00000006299	RBPJL	recombination signal binding protein for immunoglobulin kappa J region-like	gga04330:Notch signaling pathway,
GT_EA606_A_87_P125373	-1.80363	0.0108199	ENSGALT00000006299	RBPJL	recombination signal binding protein for immunoglobulin kappa J region-like	gga04330:Notch signaling pathway,
GT_EA606_A_87_P119523	-1.30827	0.0402912	NM_204999	RPL13	ribosomal protein L13	gga03010:Ribosome,
GT_EA606_A_87_P126878	-1.32377	0.24065	CR406939	RPL21	ribosomal protein L21	gga03010:Ribosome,
GT_EA606_A_87_P116868	-1.27081	0.0106221	ENSGALT00000027081	RPL31	ribosomal protein L31	gga03010:Ribosome,
GT_EA606_A_87_P052881	-1.16816	0.0166049	NM_204273	RPL35	ribosomal protein L35	gga03010:Ribosome,
GT_EA606_A_87_P022373	-2.21629	0.00142741	NM_001122763	RPL37	ribosomal protein L37	gga03010:Ribosome,
GT_EA606_A_87_P144868	-3.43733	0.0518619	DR410822	RPL39	ribosomal protein L39	gga03010:Ribosome,
GT_EA606_A_87_P298538	-1.27221	0.011455	NM_001007479	RPL4	ribosomal protein L4	gga03010:Ribosome,
GT_EA606_A_87_P116833	-1.38135	0.0526579	NM_204152	RPL6	similar to tax-responsive element binding protein 107; ribosomal protein L6	gga03010:Ribosome,
GT_EA606_A_87_P071771	-1.25679	0.0160309	ENSGALT00000010956	RPS15A	ribosomal protein S15a	gga03010:Ribosome,
GT_EA606_A_87_P117818	-1.41715	0.0186513	ENSGALT00000007776	RPS24	ribosomal protein S24	gga03010:Ribosome,
GT_EA606_A_87_P124943	-1.29692	0.0457693	ENSGALT00000041279	RPS28	ribosomal protein S28	gga03010:Ribosome,
GT_EA606_A_87_P179639	-1.16473	0.0201847	ENSGALT00000041279	RPS28	ribosomal protein S28	gga03010:Ribosome,
GT_EA606_A_87_P317412	-1.40986	0.0197137	XM_001235170	MKNK1	MAP kinase interacting serine/threonine kinase 1	gga04010:MAPK signaling pathway,gga04910:Insulin signaling pathway,
GT_EA606_A_87_P105323	-2.20172	0.0160977	ENSGALT00000026061	PTK2	PTK2 protein tyrosine kinase 2	gga04012:ErbB signaling pathway,gga04370:VEGF signaling pathway,gga04510:Focal adhesion,gga04810:Regulation of actin cytoskeleton,
GT_EA606_A_87_P105328	-2.34809	0.112164	NM_205435	PTK2	PTK2 protein tyrosine kinase 2	gga04012:ErbB signaling pathway,gga04370:VEGF signaling pathway,gga04510:Focal adhesion,gga04810:Regulation of actin cytoskeleton,
GT_EA606_A_87_P130523	-3.15794	0.171047	NM_205435	PTK2	PTK2 protein tyrosine kinase 2	gga04012:ErbB signaling pathway,gga04370:VEGF signaling pathway,gga04510:Focal adhesion,gga04810:Regulation of actin cytoskeleton,
GT_EA606_A_87_P094176	-1.56375	0.0802715	NM_204210	DIAPH1	diaphanous homolog 1 (Drosophila)	gga04810:Regulation of actin cytoskeleton,
GT_EA606_A_87_P094181	-2.17157	0.0410346	NM_204210	DIAPH1	diaphanous homolog 1 (Drosophila)	gga04810:Regulation of actin cytoskeleton,
GT_EA606_A_87_P008962	-1.67378	0.0776837	NM_205301	YES1	v-yes-1 Yamaguchi sarcoma viral oncogene homolog 1	gga04520:Adherens junction,gga04530:Tight junction,
GT_EA606_A_87_P009204	-1.18754	0.0186167	S43579	SRC	v-src sarcoma viral oncogene	gga04012:ErbB signaling pathway,gga04144:Endocytosis,gga04370:VEGF signaling pathway,gga04510:Focal adhesion,gga04520:Adherens junction,gga04530:Tight junction,gga04540:Gap junction,gga04912:GnRH signaling pathway,
GT_EA606_A_87_P130933	-1.56435	0.0380305	S43587	SRC	v-src sarcoma viral oncogene	gga04012:ErbB signaling pathway,gga04144:Endocytosis,gga04370:VEGF signaling pathway,gga04510:Focal adhesion,gga04520:Adherens junction,gga04530:Tight junction,gga04540:Gap junction,gga04912:GnRH signaling pathway,
GT_EA606_A_87_P130943	-1.89898	0.0424307	S43613	SRC	v-src sarcoma viral oncogene	gga04012:ErbB signaling pathway,gga04144:Endocytosis,gga04370:VEGF signaling pathway,gga04510:Focal adhesion,gga04520:Adherens junction,gga04530:Tight junction,gga04540:Gap junction,gga04912:GnRH signaling pathway,
GT_EA606_A_87_P130953	-1.97271	0.129123	S43616	SRC	v-src sarcoma viral oncogene	gga04012:ErbB signaling pathway,gga04144:Endocytosis,gga04370:VEGF signaling pathway,gga04510:Focal adhesion,gga04520:Adherens junction,gga04530:Tight junction,gga04540:Gap junction,gga04912:GnRH signaling pathway,
GT_EA606_A_87_P022027	-1.94548	0.0878534	BX935645	STK11	serine/threonine kinase 11	gga04150:mTOR signaling pathway,gga04920:Adipocytokine signaling pathway,
GT_EA606_A_87_P009704	-1.41476	0.00392988	NM_001030365	ERBB4	v-erb-a erythroblastic leukemia viral oncogene homolog 4	gga04012:ErbB signaling pathway,gga04020:Calcium signaling pathway,gga04144:Endocytosis,
GT_EA606_A_87_P271453	-2.59447	0.107067	NM_001109771	RPS6KA1	ribosomal protein S6 kinase, 90kDa, polypeptide 1	gga04010:MAPK signaling pathway,gga04114:Oocyte meiosis,gga04150:mTOR signaling pathway,gga04914:Progesterone-mediated oocyte maturation,
GT_EA606_A_87_P027626	-1.70619	0.0136502	ENSGALT00000011490	RPS6KA6	ribosomal protein S6 kinase, 90kDa, polypeptide 6	gga04010:MAPK signaling pathway,gga04114:Oocyte meiosis,gga04150:mTOR signaling pathway,gga04914:Progesterone-mediated oocyte maturation,
GT_EA606_A_87_P037617	-1.89647	0.0803351	NM_205302	BRAF	v-raf murine sarcoma viral oncogene homolog B1	gga04010:MAPK signaling pathway,gga04012:ErbB signaling pathway,gga04150:mTOR signaling pathway,gga04270:Vascular smooth muscle contraction,gga04510:Focal adhesion,gga04650:Natural killer cell mediated cytotoxicity,gga04810:Regulation of actin cytoskeleto
GT_EA606_A_87_P057781	-2.23037	0.0197437	NM_205302	BRAF	v-raf murine sarcoma viral oncogene homolog B1	gga04010:MAPK signaling pathway,gga04012:ErbB signaling pathway,gga04150:mTOR signaling pathway,gga04270:Vascular smooth muscle contraction,gga04510:Focal adhesion,gga04650:Natural killer cell mediated cytotoxicity,gga04810:Regulation of actin cytoskeleto
GT_EA606_A_87_P009285	-1.78056	0.144579	NM_205425	CSK	c-src tyrosine kinase	gga04810:Regulation of actin cytoskeleton,
GT_EA606_A_87_P123578	-2.49275	0.182343	NM_205425	CSK	c-src tyrosine kinase	gga04810:Regulation of actin cytoskeleton,
GT_EA606_A_87_P068436	-3.01738	0.162111	ENSGALT00000006164	ABL1	v-abl Abelson murine leukemia viral oncogene homolog 1	gga04012:ErbB signaling pathway,gga04110:Cell cycle,
GT_EA606_A_87_P036358	-2.2397	0.00637799	NM_001031353	ADRBK1	adrenergic, beta, receptor kinase 1	gga04144:Endocytosis,
GT_EA606_A_87_P013161	-1.98017	0.0693233	ENSGALT00000008853	ADRBK2	adrenergic, beta, receptor kinase 2	gga04144:Endocytosis,
GT_EA606_A_87_P241768	-1.86278	0.0855327	ENSGALT00000008853	ADRBK2	adrenergic, beta, receptor kinase 2	gga04144:Endocytosis,
GT_EA606_A_87_P013215	-2.11998	0.0193767	ENSGALT00000022752	GRK6	G protein-coupled receptor kinase 6	gga04144:Endocytosis,
GT_EA606_A_87_P009668	-1.15664	0.0950899	NM_001044669	ERBB3	v-erb-b2 erythroblastic leukemia viral oncogene homolog 3 (avian)	gga04012:ErbB signaling pathway,gga04020:Calcium signaling pathway,gga04144:Endocytosis,
GT_EA606_A_87_P213103	-1.55986	0.0651183	NM_205510	FGFR1	fibroblast growth factor receptor 1	gga04010:MAPK signaling pathway,gga04520:Adherens junction,gga04810:Regulation of actin cytoskeleton,
GT_EA606_A_87_P096701	-1.97553	0.0706121	NM_205509	FGFR3	fibroblast growth factor receptor 3	gga04010:MAPK signaling pathway,gga04144:Endocytosis,gga04810:Regulation of actin cytoskeleton,
GT_EA606_A_87_P060581	-4.50078	0.082276	ENSGALT00000020492	ACVR1B	activin A receptor, type IB	gga04010:MAPK signaling pathway,gga04144:Endocytosis,gga04350:TGF-beta signaling pathway,gga04520:Adherens junction,
GT_EA606_A_87_P037920	-1.8263	0.0722189	NM_204295	CAMK2A	calcium/calmodulin-dependent protein kinase II alpha	gga04012:ErbB signaling pathway,gga04020:Calcium signaling pathway,gga04114:Oocyte meiosis,gga04310:Wnt signaling pathway,gga04912:GnRH signaling pathway,gga04916:Melanogenesis,
GT_EA606_A_87_P095786	-2.14917	0.0378475	ENSGALT00000037701	CAMK2D	calcium/calmodulin-dependent protein kinase (CaM kinase) II delta	gga04012:ErbB signaling pathway,gga04020:Calcium signaling pathway,gga04114:Oocyte meiosis,gga04310:Wnt signaling pathway,gga04912:GnRH signaling pathway,gga04916:Melanogenesis,
GT_EA606_A_87_P165028	-1.36311	0.025693	XM_415134	CAMKK2	calcium/calmodulin-dependent protein kinase kinase 2, beta	gga04920:Adipocytokine signaling pathway,
GT_EA606_A_87_P109773	-2.12536	0.071784	ENSGALT00000026163	CASK	calcium/calmodulin-dependent serine protein kinase (MAGUK family)	gga04530:Tight junction,
GT_EA606_A_87_P001644	-2.24407	0.00711794	ENSGALT00000009749	CDC7	cell division cycle 7 homolog (S. cerevisiae)	gga04110:Cell cycle,
GT_EA606_A_87_P017674	-1.36236	0.0250242	ENSGALT00000030475	GSK3B	glycogen synthase kinase 3 beta	gga04012:ErbB signaling pathway,gga04110:Cell cycle,gga04310:Wnt signaling pathway,gga04340:Hedgehog signaling pathway,gga04510:Focal adhesion,gga04910:Insulin signaling pathway,gga04916:Melanogenesis,
GT_EA606_A_87_P009478	-1.43352	0.0463452	NM_205388	MAP2K2	mitogen-activated protein kinase kinase 2	gga04010:MAPK signaling pathway,gga04012:ErbB signaling pathway,gga04270:Vascular smooth muscle contraction,gga04370:VEGF signaling pathway,gga04540:Gap junction,gga04620:Toll-like receptor signaling pathway,gga04650:Natural killer cell mediated cytotoxic
GT_EA606_A_87_P131083	-1.29249	0.0623624	NM_205388	MAP2K2	mitogen-activated protein kinase kinase 2	gga04010:MAPK signaling pathway,gga04012:ErbB signaling pathway,gga04270:Vascular smooth muscle contraction,gga04370:VEGF signaling pathway,gga04540:Gap junction,gga04620:Toll-like receptor signaling pathway,gga04650:Natural killer cell mediated cytotoxic
GT_EA606_A_87_P253718	-1.07028	0.0124346	NM_001079716	MAP2K5	mitogen-activated protein kinase kinase 5	gga04010:MAPK signaling pathway,gga04540:Gap junction,
GT_EA606_A_87_P076951	-2.31602	0.00797976	ENSGALT00000010764	MAP3K13	mitogen-activated protein kinase kinase kinase 13	gga04010:MAPK signaling pathway,
GT_EA606_A_87_P158558	-2.29065	0.0114317	ENSGALT00000010764	MAP3K13	mitogen-activated protein kinase kinase kinase 13	gga04010:MAPK signaling pathway,
GT_EA606_A_87_P015959	-2.07369	0.154926	ENSGALT00000040505	MAP3K3	mitogen-activated protein kinase kinase kinase 3	gga04010:MAPK signaling pathway,gga04912:GnRH signaling pathway,
GT_EA606_A_87_P011587	-3.48045	0.116051	ENSGALT00000018893	MAP3K4	mitogen-activated protein kinase kinase kinase 4	gga04010:MAPK signaling pathway,gga04912:GnRH signaling pathway,
GT_EA606_A_87_P026945	-1.72023	0.0259927	ENSGALT00000018893	MAP3K4	mitogen-activated protein kinase kinase kinase 4	gga04010:MAPK signaling pathway,gga04912:GnRH signaling pathway,
GT_EA606_A_87_P029741	-3.03087	0.0224503	ENSGALT00000018893	MAP3K4	mitogen-activated protein kinase kinase kinase 4	gga04010:MAPK signaling pathway,gga04912:GnRH signaling pathway,
GT_EA606_A_87_P222658	-3.36213	0.0870302	ENSGALT00000018893	MAP3K4	mitogen-activated protein kinase kinase kinase 4	gga04010:MAPK signaling pathway,gga04912:GnRH signaling pathway,
GT_EA606_A_87_P006638	-2.54679	0.145824	XM_419725	MAP3K5	mitogen-activated protein kinase kinase kinase 5	gga04010:MAPK signaling pathway,
GT_EA606_A_87_P152418	-1.57122	0.0909695	XM_417976	MAPKAPK2	mitogen-activated protein kinase-activated protein kinase 2	gga04010:MAPK signaling pathway,gga04370:VEGF signaling pathway,
GT_EA606_A_87_P023730	-2.66232	0.0871969	NM_001162372	PAK1	similar to PAK3 protein; p21 (CDKN1A)-activated kinase 3; p21 protein (Cdc42/Rac)-activated kinase 1	gga04010:MAPK signaling pathway,gga04012:ErbB signaling pathway,gga04510:Focal adhesion,gga04650:Natural killer cell mediated cytotoxicity,gga04810:Regulation of actin cytoskeleton,
GT_EA606_A_87_P126293	-2.18419	0.100105	CR406103	PAK2	p21 (CDKN1A)-activated kinase 2	gga04010:MAPK signaling pathway,gga04012:ErbB signaling pathway,gga04510:Focal adhesion,gga04810:Regulation of actin cytoskeleton,
GT_EA606_A_87_P280878	-2.05699	0.0313691	ENSGALT00000010372	PAK2	p21 (CDKN1A)-activated kinase 2	gga04010:MAPK signaling pathway,gga04012:ErbB signaling pathway,gga04510:Focal adhesion,gga04810:Regulation of actin cytoskeleton,
GT_EA606_A_87_P017090	-3.5707	0.00607812	NM_001199409	PAK7	p21(CDKN1A)-activated kinase 7	gga04012:ErbB signaling pathway,gga04510:Focal adhesion,gga04810:Regulation of actin cytoskeleton,
GT_EA606_A_87_P023138	-1.41528	0.00641348	BX933236	ZAK	similar to Plaucible mixed-lineage kinase protein; similar to MLTK-alpha; similar to MLTK alpha; similar to mixed lineage kinase ZAK; sterile alpha motif and leucine zipper containing kinase AZK	gga04010:MAPK signaling pathway,gga04530:Tight junction,
GT_EA606_A_87_P130553	-1.42363	0.119482	L20630	PTPN1	protein tyrosine phosphatase, non-receptor type 1	gga04520:Adherens junction,gga04910:Insulin signaling pathway,
GT_EA606_A_87_P207113	-1.4724	0.0689158	NM_204968	PTPN11	protein tyrosine phosphatase, non-receptor type 11; similar to cSH-PTP2	gga04630:Jak-STAT signaling pathway,gga04650:Natural killer cell mediated cytotoxicity,gga04920:Adipocytokine signaling pathway,
GT_EA606_A_87_P028983	-1.34557	0.0155647	ENSGALT00000010293	PTPN5	protein tyrosine phosphatase, non-receptor type 5 (striatum-enriched)	gga04010:MAPK signaling pathway,
GT_EA606_A_87_P052226	-2.40905	0.00148938	NM_001039260	WWP2	WW domain containing E3 ubiquitin protein ligase 2	gga04120:Ubiquitin mediated proteolysis,
GT_EA606_A_87_P246748	-1.52972	0.0498838	NM_001039260	WWP2	WW domain containing E3 ubiquitin protein ligase 2	gga04120:Ubiquitin mediated proteolysis,
GT_EA606_A_87_P022673	-2.71696	0.0195638	BX934252	UBE3B	similar to ubiquitin protein ligase E3B; similar to ubiquitin protein ligase; ubiquitin protein ligase E3B	gga04120:Ubiquitin mediated proteolysis,
GT_EA606_A_87_P017748	-3.81349	0.0525101	CR353737	HLCS	holocarboxylase synthetase (biotin-(proprionyl-Coenzyme A-carboxylase (ATP-hydrolysing)) ligase)	gga00780:Biotin metabolism,
GT_EA606_A_87_P285058	-3.17314	0.0341279	ENSGALT00000027040	UBE3A	ubiquitin protein ligase E3A (human papilloma virus E6-associated protein, Angelman syndrome)	gga04120:Ubiquitin mediated proteolysis,
GT_EA606_A_87_P016029	-1.61466	0.0883252	ENSGALT00000008191	CUL3	cullin 3	gga04120:Ubiquitin mediated proteolysis,
GT_EA606_A_87_P122408	-2.08601	0.0361695	ENSGALT00000027725	CUL5	cullin 5	gga04120:Ubiquitin mediated proteolysis,
GT_EA606_A_87_P149863	-2.67156	0.0894995	DR420846	PSMB2	proteasome (prosome, macropain) subunit, beta type, 2	gga03050:Proteasome,
GT_EA606_A_87_P068776	-1.29809	0.00932335	ENSGALT00000038720	PSMB7	proteasome (prosome, macropain) subunit, beta type, 7	gga03050:Proteasome,
GT_EA606_A_87_P009763	-1.47088	0.0571513	NM_204861	ANPEP	alanyl (membrane) aminopeptidase (aminopeptidase N, aminopeptidase M, microsomal aminopeptidase, CD13, p150)	gga00480:Glutathione metabolism,gga04614:Renin-angiotensin system,
GT_EA606_A_87_P009087	-1.46937	0.0118325	NM_204971	CTSK	cathepsin K	gga04142:Lysosome,
GT_EA606_A_87_P038211	-2.02955	0.140516	NM_001044672	LOC693249	mu-calpain large subunit	gga04210:Apoptosis,
GT_EA606_A_87_P215973	-1.7808	0.0737678	ENSGALT00000002108	PI4KA	phosphatidylinositol 4-kinase, catalytic, alpha	gga00562:Inositol phosphate metabolism,gga04070:Phosphatidylinositol signaling system,
GT_EA606_A_87_P253983	-3.13731	0.242448	ENSGALT00000002452	PIP4K2B	phosphatidylinositol-5-phosphate 4-kinase, type II, beta	gga00562:Inositol phosphate metabolism,gga04070:Phosphatidylinositol signaling system,gga04144:Endocytosis,gga04810:Regulation of actin cytoskeleton,
GT_EA606_A_87_P028434	-1.28639	0.162903	NM_001142440	PIP5K1A	phosphatidylinositol-4-phosphate 5-kinase, type I, alpha	gga00562:Inositol phosphate metabolism,gga04070:Phosphatidylinositol signaling system,gga04144:Endocytosis,gga04810:Regulation of actin cytoskeleton,
GT_EA606_A_87_P084811	-2.99919	0.066884	ENSGALT00000014579	PLA2G4E	phospholipase A2, group IVE	gga00564:Glycerophospholipid metabolism,gga00565:Ether lipid metabolism,gga00590:Arachidonic acid metabolism,gga00591:Linoleic acid metabolism,gga00592:alpha-Linolenic acid metabolism,gga04010:MAPK signaling pathway,gga04270:Vascular smooth muscle contrac
GT_EA606_A_87_P009389	-1.64612	0.0550606	NM_001001901	CYP17A1	cytochrome P450, family 17, subfamily A, polypeptide 1	gga00140:Steroid hormone biosynthesis,
GT_EA606_A_87_P030244	-2.81299	0.165232	XM_425261	PLCB1	phospholipase C, beta 1 (phosphoinositide-specific)	gga00562:Inositol phosphate metabolism,gga04020:Calcium signaling pathway,gga04070:Phosphatidylinositol signaling system,gga04270:Vascular smooth muscle contraction,gga04310:Wnt signaling pathway,gga04540:Gap junction,gga04912:GnRH signaling pathway,gga04
GT_EA606_A_87_P097436	-3.23955	0.0317003	ENSGALT00000014420	PLCB1	phospholipase C, beta 1 (phosphoinositide-specific)	gga00562:Inositol phosphate metabolism,gga04020:Calcium signaling pathway,gga04070:Phosphatidylinositol signaling system,gga04270:Vascular smooth muscle contraction,gga04310:Wnt signaling pathway,gga04540:Gap junction,gga04912:GnRH signaling pathway,gga04
GT_EA606_A_87_P275093	-2.21786	0.00775691	ENSGALT00000014420	PLCB1	phospholipase C, beta 1 (phosphoinositide-specific)	gga00562:Inositol phosphate metabolism,gga04020:Calcium signaling pathway,gga04070:Phosphatidylinositol signaling system,gga04270:Vascular smooth muscle contraction,gga04310:Wnt signaling pathway,gga04540:Gap junction,gga04912:GnRH signaling pathway,gga04
GT_EA606_A_87_P020509	-2.87466	0.0578933	NM_001199435	PLCB4	phospholipase C, beta 4	gga00562:Inositol phosphate metabolism,gga04020:Calcium signaling pathway,gga04070:Phosphatidylinositol signaling system,gga04270:Vascular smooth muscle contraction,gga04310:Wnt signaling pathway,gga04540:Gap junction,gga04912:GnRH signaling pathway,gga04
GT_EA606_A_87_P058536	-1.37036	0.0102772	NM_001039294	FDFT1	farnesyl-diphosphate farnesyltransferase 1	gga00100:Steroid biosynthesis,
GT_EA606_A_87_P021372	-1.7506	0.0561907	NM_001130738	PLA2G6	phospholipase A2, group VI (cytosolic, calcium-independent)	gga00564:Glycerophospholipid metabolism,gga00565:Ether lipid metabolism,gga00590:Arachidonic acid metabolism,gga00591:Linoleic acid metabolism,gga00592:alpha-Linolenic acid metabolism,gga04010:MAPK signaling pathway,gga04270:Vascular smooth muscle contrac
GT_EA606_A_87_P057126	-1.91018	0.23898	NM_204969	PLA2G7	phospholipase A2, group VII (platelet-activating factor acetylhydrolase, plasma)	gga00565:Ether lipid metabolism,
GT_EA606_A_87_P057096	-1.91938	0.00116552	NM_001130740	PNPLA4	patatin-like phospholipase domain containing 4; similar to Patatin-like phospholipase domain containing 4	gga00830:Retinol metabolism,
GT_EA606_A_87_P199378	-1.60189	0.0451338	NM_001006471	TOLLIP	toll interacting protein	gga04620:Toll-like receptor signaling pathway,
GT_EA606_A_87_P095986	-2.10233	0.0587848	ENSGALT00000022188	MTMR7	myotubularin related protein 7	gga00051:Fructose and mannose metabolism,gga00730:Thiamine metabolism,gga00740:Riboflavin metabolism,
GT_EA606_A_87_P011583	-3.03519	0.0893289	ENSGALT00000025637	SYNJ1	synaptojanin 1	gga00562:Inositol phosphate metabolism,gga04070:Phosphatidylinositol signaling system,
GT_EA606_A_87_P037999	-3.04037	0.100227	AF027607	CACNA1D	calcium channel, voltage-dependent, L type, alpha 1D subunit	gga04010:MAPK signaling pathway,gga04020:Calcium signaling pathway,gga04260:Cardiac muscle contraction,gga04270:Vascular smooth muscle contraction,gga04912:GnRH signaling pathway,
GT_EA606_A_87_P038003	-1.16162	0.0132065	NM_205034	CACNA1D	calcium channel, voltage-dependent, L type, alpha 1D subunit	gga04010:MAPK signaling pathway,gga04020:Calcium signaling pathway,gga04260:Cardiac muscle contraction,gga04270:Vascular smooth muscle contraction,gga04912:GnRH signaling pathway,
GT_EA606_A_87_P073826	-1.66969	0.0791272	NM_205034	CACNA1D	calcium channel, voltage-dependent, L type, alpha 1D subunit	gga04010:MAPK signaling pathway,gga04020:Calcium signaling pathway,gga04260:Cardiac muscle contraction,gga04270:Vascular smooth muscle contraction,gga04912:GnRH signaling pathway,
GT_EA606_A_87_P078570	-1.78957	0.0860039	ENSGALT00000039677	CACNA1E	calcium channel, voltage-dependent, R type, alpha 1E subunit	gga04010:MAPK signaling pathway,gga04020:Calcium signaling pathway,
GT_EA606_A_87_P011293	-3.02795	0.134407	ENSGALT00000022784	ITPR2	inositol 1,4,5-triphosphate receptor, type 2	gga04020:Calcium signaling pathway,gga04070:Phosphatidylinositol signaling system,gga04114:Oocyte meiosis,gga04270:Vascular smooth muscle contraction,gga04540:Gap junction,gga04912:GnRH signaling pathway,
GT_EA606_A_87_P020940	-1.99905	0.00355025	ENSGALT00000022784	ITPR2	inositol 1,4,5-triphosphate receptor, type 2	gga04020:Calcium signaling pathway,gga04070:Phosphatidylinositol signaling system,gga04114:Oocyte meiosis,gga04270:Vascular smooth muscle contraction,gga04540:Gap junction,gga04912:GnRH signaling pathway,
GT_EA606_A_87_P017671	-2.40892	0.0300629	CR353879	GRIA2	glutamate receptor, ionotropic, AMPA 2	gga04080:Neuroactive ligand-receptor interaction,
GT_EA606_A_87_P054681	-1.5159	0.0467477	NM_001001775	GRIA2	glutamate receptor, ionotropic, AMPA 2	gga04080:Neuroactive ligand-receptor interaction,
GT_EA606_A_87_P054796	-1.318	0.0144227	NM_001112799	GRIA3	glutamate receptor, ionotrophic, AMPA 3	gga04080:Neuroactive ligand-receptor interaction,
GT_EA606_A_87_P125993	-2.98847	0.0231809	NM_001112799	GRIA3	glutamate receptor, ionotrophic, AMPA 3	gga04080:Neuroactive ligand-receptor interaction,
GT_EA606_A_87_P003485	-1.55598	0.118836	XM_416697	GRIK1	glutamate receptor, ionotropic, kainate 1	gga04080:Neuroactive ligand-receptor interaction,
GT_EA606_A_87_P064891	-1.89084	0.0150637	ENSGALT00000010723	GRIK4	glutamate receptor, ionotropic, kainate 4	gga04080:Neuroactive ligand-receptor interaction,
GT_EA606_A_87_P133673	-1.11285	0.0599724	ENSGALT00000007345	P2RX5	purinergic receptor P2X, ligand-gated ion channel, 5	gga04020:Calcium signaling pathway,gga04080:Neuroactive ligand-receptor interaction,
GT_EA606_A_87_P036545	-1.56674	0.0667892	NM_001006222	GOSR1	golgi SNAP receptor complex member 1	gga04130:SNARE interactions in vesicular transport,
GT_EA606_A_87_P036331	-1.85136	0.123688	NM_001006132	AP1G1	adaptor-related protein complex 1, gamma 1 subunit	gga04142:Lysosome,
GT_EA606_A_87_P066701	-1.84071	0.083404	NM_001080117	CLTC	clathrin, heavy chain (Hc)	gga04142:Lysosome,gga04144:Endocytosis,
GT_EA606_A_87_P066706	-3.17279	0.289831	NM_001080117	CLTC	clathrin, heavy chain (Hc)	gga04142:Lysosome,gga04144:Endocytosis,
GT_EA606_A_87_P220703	-3.52641	0.208635	NM_001031108	GGA3	golgi associated, gamma adaptin ear containing, ARF binding protein 3	gga04142:Lysosome,
GT_EA606_A_87_P234148	-1.65062	0.068273	CR387165	STAM2	signal transducing adaptor molecule (SH3 domain and ITAM motif) 2	gga04144:Endocytosis,gga04630:Jak-STAT signaling pathway,
GT_EA606_A_87_P053641	-1.73606	0.136989	NM_001031593	VPS45	vacuolar protein sorting 45 homolog (S. cerevisiae); similar to vacuolar protein sorting 45A (yeast)	gga04144:Endocytosis,
GT_EA606_A_87_P012885	-2.03358	0.168767	NM_001030867	RAB22A	RAB22A, member RAS oncogene family	gga04144:Endocytosis,
GT_EA606_A_87_P051721	-2.46278	0.14935	NM_001030867	RAB22A	RAB22A, member RAS oncogene family	gga04144:Endocytosis,
GT_EA606_A_87_P055021	-2.16758	0.0588167	NM_001031355	FAM125A	family with sequence similarity 125, member A	gga04144:Endocytosis,
GT_EA606_A_87_P031472	-2.12242	0.0814737	ENSGALT00000005109	RAB11FIP4	RAB11 family interacting protein 4 (class II)	gga04144:Endocytosis,
GT_EA606_A_87_P122278	-2.33639	0.0389115	CR387084	TAP1	transporter 1, ATP-binding cassette, sub-family B (MDR/TAP)	gga02010:ABC transporters,
GT_EA606_A_87_P241428	-3.00497	0.04715	NM_001135968	TAP1	transporter 1, ATP-binding cassette, sub-family B (MDR/TAP)	gga02010:ABC transporters,
GT_EA606_A_87_P108423	-1.25581	0.0521265	ENSGALT00000023310	VAMP1	vesicle-associated membrane protein 1 (synaptobrevin 1)	gga04130:SNARE interactions in vesicular transport,
GT_EA606_A_87_P050751	-2.58528	0.0402102	NM_001012917	WIPF1	similar to WAS/WASL interacting protein family, member 1; WAS/WASL interacting protein family, member 1
GT_EA606_A_87_P312237	-1.45431	0.155269	NM_001012917	WIPF1	similar to WAS/WASL interacting protein family, member 1; WAS/WASL interacting protein family, member 1
GT_EA606_A_87_P122983	-1.34425	0.0220154	CR388445	ABCB6	ATP-binding cassette, sub-family B (MDR/TAP), member 6	gga02010:ABC transporters,
GT_EA606_A_87_P125508	-2.62884	0.0802177	NM_001012522	ABCC1	ATP-binding cassette, sub-family C (CFTR/MRP), member 1	gga02010:ABC transporters,
GT_EA606_A_87_P034543	-1.32151	0.00602771	ENSGALT00000012164	ABCC3	ATP-binding cassette, sub-family C (CFTR/MRP), member 3	gga02010:ABC transporters,
GT_EA606_A_87_P238853	-1.86267	0.129826	ENSGALT00000012164	ABCC3	ATP-binding cassette, sub-family C (CFTR/MRP), member 3	gga02010:ABC transporters,
GT_EA606_A_87_P266458	-2.48302	0.00348445	ENSGALT00000012164	ABCC3	ATP-binding cassette, sub-family C (CFTR/MRP), member 3	gga02010:ABC transporters,
GT_EA606_A_87_P101741	-2.21043	0.0454887	ENSGALT00000017732	LOC420606	similar to multidrug resistance protein 1a	gga02010:ABC transporters,
GT_EA606_A_87_P203423	-1.77917	0.119933	NM_001012597	ABCD3	ATP-binding cassette, sub-family D (ALD), member 3	gga02010:ABC transporters,
GT_EA606_A_87_P022510	-1.93415	0.0257139	ENSGALT00000026046	ABCG1	ATP-binding cassette, sub-family G (WHITE), member 1	gga02010:ABC transporters,
GT_EA606_A_87_P000596	-2.31351	0.0688886	NM_001128101	SLC11A2	solute carrier family 11 (proton-coupled divalent metal ion transporters), member 2	gga04142:Lysosome,
GT_EA606_A_87_P029898	-3.46476	0.288476	BU319434	IFNA3	similar to interferon alpha; interferon	gga04060:Cytokine-cytokine receptor interaction,gga04140:Regulation of autophagy,gga04620:Toll-like receptor signaling pathway,gga04622:RIG-I-like receptor signaling pathway,gga04623:Cytosolic DNA-sensing pathway,gga04630:Jak-STAT signaling pathway,gga046
GT_EA606_A_87_P059656	-2.30979	0.223285	NM_205427	IFNA3	similar to interferon alpha; interferon	gga04060:Cytokine-cytokine receptor interaction,gga04140:Regulation of autophagy,gga04620:Toll-like receptor signaling pathway,gga04622:RIG-I-like receptor signaling pathway,gga04623:Cytosolic DNA-sensing pathway,gga04630:Jak-STAT signaling pathway,gga046
GT_EA606_A_87_P091555	-2.789	0.138706	NM_205427	IFNA3	similar to interferon alpha; interferon	gga04060:Cytokine-cytokine receptor interaction,gga04140:Regulation of autophagy,gga04620:Toll-like receptor signaling pathway,gga04622:RIG-I-like receptor signaling pathway,gga04623:Cytosolic DNA-sensing pathway,gga04630:Jak-STAT signaling pathway,gga046
GT_EA606_A_87_P307762	-2.46706	0.102631	NM_205427	IFNA3	similar to interferon alpha; interferon	gga04060:Cytokine-cytokine receptor interaction,gga04140:Regulation of autophagy,gga04620:Toll-like receptor signaling pathway,gga04622:RIG-I-like receptor signaling pathway,gga04623:Cytosolic DNA-sensing pathway,gga04630:Jak-STAT signaling pathway,gga046
GT_EA606_A_87_P008963	-2.99132	0.150839	X08031	TNC	tenascin C	gga04510:Focal adhesion,gga04512:ECM-receptor interaction,
GT_EA606_A_87_P130483	-2.74365	0.112071	NM_205456	TNC	tenascin C	gga04510:Focal adhesion,gga04512:ECM-receptor interaction,
GT_EA606_A_87_P130683	-3.0177	0.149436	NM_205456	TNC	tenascin C	gga04510:Focal adhesion,gga04512:ECM-receptor interaction,
GT_EA606_A_87_P131578	-2.85945	0.109092	NM_205456	TNC	tenascin C	gga04510:Focal adhesion,gga04512:ECM-receptor interaction,
GT_EA606_A_87_P008433	-1.96108	0.096781	ENSGALT00000039040	ADRA2A	adrenergic, alpha-2A-, receptor	gga04080:Neuroactive ligand-receptor interaction,
GT_EA606_A_87_P015187	-1.51772	0.0428039	ENSGALT00000023005	SMC1B	structural maintenance of chromosomes 1B	gga04110:Cell cycle,gga04114:Oocyte meiosis,
GT_EA606_A_87_P015231	-1.58435	0.00803521	ENSGALT00000030935	SMCHD1	structural maintenance of chromosomes flexible hinge domain containing 1
GT_EA606_A_87_P238888	-1.77241	0.00214805	ENSGALT00000030935	SMCHD1	structural maintenance of chromosomes flexible hinge domain containing 1
GT_EA606_A_87_P307473	-1.3233	0.0732035	NM_204129	MID1	similar to midline-1; midline 1	gga04120:Ubiquitin mediated proteolysis,
GT_EA606_A_87_P008766	-2.89843	0.116454	NM_205441	VCL	vinculin	gga04510:Focal adhesion,gga04520:Adherens junction,gga04810:Regulation of actin cytoskeleton,
GT_EA606_A_87_P080426	-2.55814	0.100541	NM_205441	VCL	vinculin	gga04510:Focal adhesion,gga04520:Adherens junction,gga04810:Regulation of actin cytoskeleton,
GT_EA606_A_87_P215618	-2.09988	0.175554	NM_205239	CCNB3	cyclin B3	gga04110:Cell cycle,gga04115:p53 signaling pathway,gga04914:Progesterone-mediated oocyte maturation,
GT_EA606_A_87_P037990	-2.72849	0.0891347	NM_001030337	FZD1	frizzled homolog 1 (Drosophila)	gga04310:Wnt signaling pathway,gga04916:Melanogenesis,
GT_EA606_A_87_P130383	-1.10285	0.0450592	AF224314	FZD1	frizzled homolog 1 (Drosophila)	gga04310:Wnt signaling pathway,gga04916:Melanogenesis,
GT_EA606_A_87_P041313	-3.05001	0.0121333	XM_425197	SH3PXD2B	similar to SH3 and PX domains 2B; similar to LOC496321 protein; SH3 and PX domains 2B
GT_EA606_A_87_P008910	-2.49609	0.0173501	NM_205266	NRCAM	neuronal cell adhesion molecule	gga04514:Cell adhesion molecules (CAMs),
GT_EA606_A_87_P057871	-2.97245	0.00168616	NM_205266	NRCAM	neuronal cell adhesion molecule	gga04514:Cell adhesion molecules (CAMs),
GT_EA606_A_87_P267918	-2.13935	0.130635	NM_204483	ITGB5	integrin, beta 5	gga04510:Focal adhesion,gga04512:ECM-receptor interaction,gga04810:Regulation of actin cytoskeleton,
GT_EA606_A_87_P008220	-1.34741	0.0161105	NM_001128828	ANKK1	ankyrin repeat and kinase domain containing 1	gga04514:Cell adhesion molecules (CAMs),
GT_EA606_A_87_P117573	-2.3481	0.124566	ENSGALT00000038796	CTNND1	catenin (cadherin-associated protein), delta 1	gga04520:Adherens junction,
GT_EA606_A_87_P231558	-2.32998	0.194361	ENSGALT00000011857	CTNND1	catenin (cadherin-associated protein), delta 1	gga04520:Adherens junction,
GT_EA606_A_87_P023912	-1.62991	0.00402146	BX931479	ITGA11	integrin, alpha 11	gga04510:Focal adhesion,gga04512:ECM-receptor interaction,gga04810:Regulation of actin cytoskeleton,
GT_EA606_A_87_P257883	-2.83564	0.186679	ENSGALT00000012997	ITGA11	integrin, alpha 11	gga04510:Focal adhesion,gga04512:ECM-receptor interaction,gga04810:Regulation of actin cytoskeleton,
GT_EA606_A_87_P025632	-1.50098	0.0604938	ENSGALT00000006123	LAMC3	laminin, gamma 3	gga04510:Focal adhesion,gga04512:ECM-receptor interaction,
GT_EA606_A_87_P008684	-2.10962	0.0724752	NM_205153	LOC396059	neuron-glia cell adhesion molecule (Ng-CAM)	gga04514:Cell adhesion molecules (CAMs),
GT_EA606_A_87_P065196	-1.52175	0.0616114	NM_001242604	NCAM1	neural cell adhesion molecule 1	gga04514:Cell adhesion molecules (CAMs),
GT_EA606_A_87_P222403	-1.13283	0.00311552	NM_001242604	NCAM1	neural cell adhesion molecule 1	gga04514:Cell adhesion molecules (CAMs),
GT_EA606_A_87_P011400	-1.25464	0.0200052	CR523744	NLGN1	neuroligin 1; hypothetical LOC424981	gga04514:Cell adhesion molecules (CAMs),
GT_EA606_A_87_P057521	-2.05445	0.0377792	NM_001081502	NLGN1	neuroligin 1; hypothetical LOC424981	gga04514:Cell adhesion molecules (CAMs),
GT_EA606_A_87_P009816	-2.0491	0.0096391	NM_204787	VCAN	versican	gga04514:Cell adhesion molecules (CAMs),
GT_EA606_A_87_P059456	-1.05454	0.000276016	NM_204787	VCAN	versican	gga04514:Cell adhesion molecules (CAMs),
GT_EA606_A_87_P050036	-1.34185	0.0150314	NM_204540	SOCS2	suppressor of cytokine signaling 2	gga04630:Jak-STAT signaling pathway,gga04910:Insulin signaling pathway,
GT_EA606_A_87_P110873	-3.47542	0.0748923	ENSGALT00000027409	DGKH	diacylglycerol kinase, eta	gga00561:Glycerolipid metabolism,gga00564:Glycerophospholipid metabolism,gga04070:Phosphatidylinositol signaling system,
GT_EA606_A_87_P022406	-1.60088	0.306421	NM_001030765	CHRM2	cholinergic receptor, muscarinic 2	gga04020:Calcium signaling pathway,gga04080:Neuroactive ligand-receptor interaction,gga04810:Regulation of actin cytoskeleton,
GT_EA606_A_87_P009236	-2.35912	0.0225858	NM_001031457	AGRP	agouti related protein homolog (mouse)	gga04920:Adipocytokine signaling pathway,
GT_EA606_A_87_P038077	-1.68582	0.0988682	NM_204362	NPFFR1	neuropeptide FF receptor 1	gga04080:Neuroactive ligand-receptor interaction,
GT_EA606_A_87_P037763	-1.61861	0.19711	NM_204098	FZD10	frizzled homolog 10 (Drosophila); similar to Frizzled-10	gga04310:Wnt signaling pathway,gga04916:Melanogenesis,
GT_EA606_A_87_P054661	-1.23766	0.00283307	NM_001110438	AVPR1A	arginine vasopressin receptor 1A	gga04020:Calcium signaling pathway,gga04080:Neuroactive ligand-receptor interaction,gga04270:Vascular smooth muscle contraction,
GT_EA606_A_87_P053851	-1.34604	0.0392648	NM_001008746	GNAL	similar to G-protein alpha-olf subunit; similar to guanine nucleotide binding protein, alpha stimulating, olfactory type; guanine nucleotide binding protein (G protein), alpha activating activity polypeptide, olfactory type	gga04020:Calcium signaling pathway,
GT_EA606_A_87_P009235	-1.20769	0.0198672	NM_001031462	MC1R	melanocortin 1 receptor (alpha melanocyte stimulating hormone receptor)	gga04080:Neuroactive ligand-receptor interaction,gga04916:Melanogenesis,
GT_EA606_A_87_P075325	-4.39241	0.0115343	ENSGALT00000038813	MC1R	melanocortin 1 receptor (alpha melanocyte stimulating hormone receptor)	gga04080:Neuroactive ligand-receptor interaction,gga04916:Melanogenesis,
GT_EA606_A_87_P057596	-3.91913	0.10032	NM_001083365	PTGER2	prostaglandin E receptor 2 (subtype EP2), 53kDa	gga04080:Neuroactive ligand-receptor interaction,
GT_EA606_A_87_P009705	-1.57938	0.125487	NM_001031518	SSTR4	somatostatin receptor 4	gga04080:Neuroactive ligand-receptor interaction,
GT_EA606_A_87_P038175	-1.32081	0.047994	NM_001097523	VIPR1	vasoactive intestinal peptide receptor 1	gga04080:Neuroactive ligand-receptor interaction,
GT_EA606_A_87_P010478	-1.10618	0.0179317	ENSGALT00000016236	ARHGAP5	Rho GTPase activating protein 5	gga04510:Focal adhesion,
GT_EA606_A_87_P035672	-2.06116	0.0841609	ENSGALT00000040950	RHOBTB2	Rho-related BTB domain containing 2	gga04120:Ubiquitin mediated proteolysis,
GT_EA606_A_87_P271498	-3.43454	0.00741962	ENSGALT00000010780	ARHGEF12	Rho guanine nucleotide exchange factor (GEF) 12	gga04270:Vascular smooth muscle contraction,
GT_EA606_A_87_P050176	-1.26573	0.0141177	NM_001006432	ARHGEF6	Rac/Cdc42 guanine nucleotide exchange factor (GEF) 6	gga04810:Regulation of actin cytoskeleton,
GT_EA606_A_87_P192863	-1.21126	0.0594314	NM_001006432	ARHGEF6	Rac/Cdc42 guanine nucleotide exchange factor (GEF) 6	gga04810:Regulation of actin cytoskeleton,
GT_EA606_A_87_P013931	-2.72431	0.116115	ENSGALT00000037551	TIAM2	T-cell lymphoma invasion and metastasis 2	gga04810:Regulation of actin cytoskeleton,
GT_EA606_A_87_P098011	-1.73055	0.0903378	NM_001127314	SOCS5	suppressor of cytokine signaling 5	gga04630:Jak-STAT signaling pathway,
GT_EA606_A_87_P010757	-1.95828	0.0460268	ENSGALT00000038792	RAPGEF2	Rap guanine nucleotide exchange factor (GEF) 2	gga04010:MAPK signaling pathway,
GT_EA606_A_87_P094786	-2.96386	0.101769	ENSGALT00000038792	RAPGEF2	Rap guanine nucleotide exchange factor (GEF) 2	gga04010:MAPK signaling pathway,
GT_EA606_A_87_P016044	-1.86517	0.034741	ENSGALT00000040547	OCRL	oculocerebrorenal syndrome of Lowe	gga00562:Inositol phosphate metabolism,gga04070:Phosphatidylinositol signaling system,
GT_EA606_A_87_P107923	-5.33285	0.0310331	ENSGALT00000037438	PDE3A	phosphodiesterase 3A, cGMP-inhibited	gga00230:Purine metabolism,
GT_EA606_A_87_P172633	-1.37365	0.0665246	XM_419729	PDE7B	phosphodiesterase 7B	gga00230:Purine metabolism,
GT_EA606_A_87_P132413	-2.25888	0.200536	NM_001031103	TNFRSF21	tumor necrosis factor receptor superfamily, member 21	gga04060:Cytokine-cytokine receptor interaction,
GT_EA606_A_87_P143693	-2.69888	0.0594811	NM_001031103	TNFRSF21	tumor necrosis factor receptor superfamily, member 21	gga04060:Cytokine-cytokine receptor interaction,
GT_EA606_A_87_P024158	-2.33802	0.177469	NM_001163650	CALCRL	calcitonin receptor-like	gga04080:Neuroactive ligand-receptor interaction,gga04270:Vascular smooth muscle contraction,
GT_EA606_A_87_P058916	-1.64187	0.0635349	NM_001012609	GNRHR	gonadotropin-releasing hormone receptor	gga04080:Neuroactive ligand-receptor interaction,gga04912:GnRH signaling pathway,
GT_EA606_A_87_P010401	-3.10224	0.141656	CV859543	HTR1B	5-hydroxytryptamine (serotonin) receptor 1B	gga04080:Neuroactive ligand-receptor interaction,
GT_EA606_A_87_P064166	-3.0854	0.113562	ENSGALT00000017851	OPRD1	opioid receptor, delta 1	gga04080:Neuroactive ligand-receptor interaction,
GT_EA606_A_87_P080241	-2.38651	0.0647914	ENSGALT00000006758	TACR2	tachykinin receptor 2	gga04020:Calcium signaling pathway,gga04080:Neuroactive ligand-receptor interaction,
GT_EA606_A_87_P121918	-1.57189	0.0961825	NM_001031340	CERK	similar to ceramide kinase; ceramide kinase	gga00600:Sphingolipid metabolism,
GT_EA606_A_87_P009787	-2.19258	0.0383964	NM_204784	WNT11	wingless-type MMTV integration site family, member 11	gga04310:Wnt signaling pathway,gga04340:Hedgehog signaling pathway,gga04916:Melanogenesis,
GT_EA606_A_87_P267478	-1.63455	0.0832201	NM_204784	WNT11	wingless-type MMTV integration site family, member 11	gga04310:Wnt signaling pathway,gga04340:Hedgehog signaling pathway,gga04916:Melanogenesis,
GT_EA606_A_87_P038055	-5.19085	0.0333057	NM_205531	WNT8A	wingless-type MMTV integration site family, member 8A	gga04310:Wnt signaling pathway,gga04340:Hedgehog signaling pathway,gga04916:Melanogenesis,
GT_EA606_A_87_P169628	-2.07523	0.191614	NM_001171771	APC2	similar to APCL protein	gga04310:Wnt signaling pathway,gga04810:Regulation of actin cytoskeleton,
GT_EA606_A_87_P308327	-2.86686	0.0803738	NM_001171771	APC2	similar to APCL protein	gga04310:Wnt signaling pathway,gga04810:Regulation of actin cytoskeleton,
GT_EA606_A_87_P017509	-3.13056	0.0397307	ENSGALT00000017166	DKK2	dickkopf homolog 2 (Xenopus laevis)	gga04310:Wnt signaling pathway,
GT_EA606_A_87_P012594	-2.33476	0.0941732	CR406698	SPRED2	sprouty-related, EVH1 domain containing 2	gga04630:Jak-STAT signaling pathway,
GT_EA606_A_87_P009132	-1.57909	0.00661097	NM_205360	ALPL	alkaline phosphatase, liver/bone/kidney	gga00790:Folate biosynthesis,
GT_EA606_A_87_P111438	-1.38789	0.0426263	ENSGALT00000021058	RDX	radixin	gga04810:Regulation of actin cytoskeleton,
GT_EA606_A_87_P174098	-2.85855	0.0464955	XM_426598	ARPC2	actin related protein 2/3 complex, subunit 2, 34kDa	gga04810:Regulation of actin cytoskeleton,
GT_EA606_A_87_P003134	-1.2712	0.208053	XM_416118	ACSS3	acyl-CoA synthetase short-chain family member 3	gga00640:Propanoate metabolism,
GT_EA606_A_87_P054246	-1.52192	0.0033016	NM_001012890	CTBP1	C-terminal binding protein 1	gga04310:Wnt signaling pathway,gga04330:Notch signaling pathway,
GT_EA606_A_87_P034828	-1.38772	0.0686976	ENSGALT00000019290	ENGASE	endo-beta-N-acetylglucosaminidase	gga00511:Other glycan degradation,
GT_EA606_A_87_P015080	-2.45122	0.0796438	CR389021	LOC416354	similar to Tcf-3 co-repressor CtBP	gga04310:Wnt signaling pathway,gga04330:Notch signaling pathway,
GT_EA606_A_87_P012445	-2.87631	0.132372	ENSGALT00000024770	PIGG	phosphatidylinositol glycan anchor biosynthesis, class G	gga00563:Glycosylphosphatidylinositol(GPI)-anchor biosynthesis,
GT_EA606_A_87_P275573	-5.47334	0.0065491	XM_424872	PIGG	phosphatidylinositol glycan anchor biosynthesis, class G	gga00563:Glycosylphosphatidylinositol(GPI)-anchor biosynthesis,
GT_EA606_A_87_P297053	-2.64495	0.0694488	XM_424872	PIGG	phosphatidylinositol glycan anchor biosynthesis, class G	gga00563:Glycosylphosphatidylinositol(GPI)-anchor biosynthesis,
GT_EA606_A_87_P021138	-1.80616	0.205874	ENSGALT00000019266	UGT2A3	UDP glucuronosyltransferase 2 family, polypeptide A3	gga00040:Pentose and glucuronate interconversions,gga00053:Ascorbate and aldarate metabolism,gga00140:Steroid hormone biosynthesis,gga00150:Androgen and estrogen metabolism,gga00500:Starch and sucrose metabolism,gga00830:Retinol metabolism,gga00860:Porphy
GT_EA606_A_87_P069891	-2.51511	0.220519	ENSGALT00000012622	GAL3ST1	galactose-3-O-sulfotransferase 1	gga00600:Sphingolipid metabolism,
GT_EA606_A_87_P068921	-1.92979	0.065157	NM_001122691	TXNRD2	thioredoxin reductase 2	gga00240:Pyrimidine metabolism,
GT_EA606_A_87_P102816	-1.41338	0.125674	ENSGALT00000020670	ALDH5A1	aldehyde dehydrogenase 5 family, member A1 (succinate-semialdehyde dehydrogenase)	gga00250:Alanine, aspartate and glutamate metabolism,gga00650:Butanoate metabolism,
GT_EA606_A_87_P024065	-2.1975	0.0164664	ENSGALT00000032919	CP	ceruloplasmin (ferroxidase)	gga00860:Porphyrin and chlorophyll metabolism,
GT_EA606_A_87_P234628	-1.91344	0.191391	NM_001099358	CYP21	steroid 21-hydroxylase	gga00140:Steroid hormone biosynthesis,
GT_EA606_A_87_P147778	-2.10263	0.265026	XM_422056	CYP27A1	cytochrome P450, family 27, subfamily A, polypeptide 1	gga00120:Primary bile acid biosynthesis,gga03320:PPAR signaling pathway,
GT_EA606_A_87_P146748	-2.76347	0.0634077	XM_001232140	NDUFV2	similar to NADH dehydrogenase (ubiquinone) flavoprotein 2, 24kDa; NADH dehydrogenase (ubiquinone) flavoprotein 2, 24kDa	gga00190:Oxidative phosphorylation,
GT_EA606_A_87_P013186	-1.82669	0.00627705	ENSGALT00000026957	CDC5L	CDC5 cell division cycle 5-like (S. pombe)	gga03040:Spliceosome,
GT_EA606_A_87_P116263	-2.19333	0.0342566	ENSGALT00000026957	CDC5L	CDC5 cell division cycle 5-like (S. pombe)	gga03040:Spliceosome,
GT_EA606_A_87_P035302	-2.44644	0.0782464	NM_204589	ID3	inhibitor of DNA binding 3, dominant negative helix-loop-helix protein	gga04350:TGF-beta signaling pathway,
GT_EA606_A_87_P238863	-1.16293	0.00965835	ENSGALT00000009286	ARFGAP1	ADP-ribosylation factor GTPase activating protein 1	gga04144:Endocytosis,
GT_EA606_A_87_P055631	-1.73974	0.115919	NM_204296	GIT1	G protein-coupled receptor kinase interactor 1; similar to p95-APP1	gga04144:Endocytosis,gga04810:Regulation of actin cytoskeleton,
GT_EA606_A_87_P307518	-2.81073	0.106697	NM_204206	GIT2	G protein-coupled receptor kinase interactor 2	gga04144:Endocytosis,
GT_EA606_A_87_P080541	-2.91184	0.157929	ENSGALT00000009109	PSD	pleckstrin and Sec7 domain containing	gga04144:Endocytosis,
GT_EA606_A_87_P117583	-1.81877	0.119439	ENSGALT00000020050	SOS2	son of sevenless homolog 2 (Drosophila)	gga04010:MAPK signaling pathway,gga04012:ErbB signaling pathway,gga04320:Dorso-ventral axis formation,gga04510:Focal adhesion,gga04540:Gap junction,gga04630:Jak-STAT signaling pathway,gga04650:Natural killer cell mediated cytotoxicity,gga04810:Regulation
GT_EA606_A_87_P290963	-3.38897	0.0885636	ENSGALT00000020050	SOS2	son of sevenless homolog 2 (Drosophila)	gga04010:MAPK signaling pathway,gga04012:ErbB signaling pathway,gga04320:Dorso-ventral axis formation,gga04510:Focal adhesion,gga04540:Gap junction,gga04630:Jak-STAT signaling pathway,gga04650:Natural killer cell mediated cytotoxicity,gga04810:Regulation
GT_EA606_A_87_P118423	-3.43679	0.214333	ENSGALT00000005892	RAPGEF1	Rap guanine nucleotide exchange factor (GEF) 1	gga04510:Focal adhesion,gga04910:Insulin signaling pathway,
GT_EA606_A_87_P146358	-2.02344	0.0072542	DR413036	RPL7A	ribosomal protein L7a	gga03010:Ribosome,
GT_EA606_A_87_P037627	-2.04447	0.0744876	NM_204154	FZR1	fizzy/cell division cycle 20 related 1 (Drosophila)	gga04110:Cell cycle,gga04120:Ubiquitin mediated proteolysis,gga04914:Progesterone-mediated oocyte maturation,
GT_EA606_A_87_P068641	-1.6568	0.0442051	ENSGALT00000002925	CARD9	caspase recruitment domain family, member 9	gga04621:NOD-like receptor signaling pathway,
GT_EA606_A_87_P017301	-1.90936	0.0703277	NM_001193638	IFIH1	interferon induced with helicase C domain 1; similar to melanoma differentiation associated protein-5	gga04622:RIG-I-like receptor signaling pathway,
GT_EA606_A_87_P186548	-3.06182	0.106601	ENSGALT00000024287	LAMA3	laminin, alpha 3	gga04510:Focal adhesion,gga04512:ECM-receptor interaction,
GT_EA606_A_87_P021727	-2.69183	0.0869622	ENSGALT00000011867	ABAT	4-aminobutyrate aminotransferase	gga00250:Alanine, aspartate and glutamate metabolism,gga00280:Valine, leucine and isoleucine degradation,gga00410:beta-Alanine metabolism,gga00640:Propanoate metabolism,gga00650:Butanoate metabolism,
GT_EA606_A_87_P072226	-1.87625	0.115785	ENSGALT00000003054	ABCA3	ATP-binding cassette, sub-family A (ABC1), member 3	gga02010:ABC transporters,
GT_EA606_A_87_P300873	-3.51194	0.142899	ENSGALT00000003054	ABCA3	ATP-binding cassette, sub-family A (ABC1), member 3	gga02010:ABC transporters,
GT_EA606_A_87_P296208	-1.75212	0.164711	ENSGALT00000016963	ABCC10	ATP-binding cassette, sub-family C (CFTR/MRP), member 10	gga02010:ABC transporters,
GT_EA606_A_87_P035891	-1.30105	0.00113654	ENSGALT00000014182	ABI2	abl interactor 2	gga04810:Regulation of actin cytoskeleton,
GT_EA606_A_87_P151568	-1.09862	0.161987	ENSGALT00000026713	ACE2	angiotensin I converting enzyme (peptidyl-dipeptidase A) 2	gga04614:Renin-angiotensin system,
GT_EA606_A_87_P022819	-1.47237	0.0775912	BX933913	AK5	adenylate kinase 5	gga00230:Purine metabolism,
GT_EA606_A_87_P195148	-1.3684	0.0884901	BX933913	AK5	adenylate kinase 5	gga00230:Purine metabolism,
GT_EA606_A_87_P014026	-2.84012	0.51929	ENSGALT00000008961	ALG14	asparagine-linked glycosylation 14 homolog (S. cerevisiae)	gga00510:N-Glycan biosynthesis,
GT_EA606_A_87_P015121	-2.84646	0.109612	ENSGALT00000023591	ASH1L	ash1 (absent, small, or homeotic)-like (Drosophila)	gga00310:Lysine degradation,gga04530:Tight junction,
GT_EA606_A_87_P030857	-3.76016	0.0675794	ENSGALT00000023591	ASH1L	ash1 (absent, small, or homeotic)-like (Drosophila)	gga00310:Lysine degradation,gga04530:Tight junction,
GT_EA606_A_87_P031307	-1.96286	0.169045	ENSGALT00000023591	ASH1L	ash1 (absent, small, or homeotic)-like (Drosophila)	gga00310:Lysine degradation,gga04530:Tight junction,
GT_EA606_A_87_P010748	-1.43149	0.00174782	NM_001162400	ATM	ataxia telangiectasia mutated	gga04110:Cell cycle,gga04115:p53 signaling pathway,gga04210:Apoptosis,
GT_EA606_A_87_P147663	-3.16783	0.0931956	DR413886	ATP5J	ATP synthase, H+ transporting, mitochondrial F0 complex, subunit F6	gga00190:Oxidative phosphorylation,
GT_EA606_A_87_P065521	-1.36082	0.0036914	ENSGALT00000002878	B3GALT6	UDP-Gal:betaGal beta 1,3-galactosyltransferase polypeptide 6	gga00532:Chondroitin sulfate biosynthesis,gga00534:Heparan sulfate biosynthesis,
GT_EA606_A_87_P037235	-2.10011	0.159794	ENSGALT00000002453	B3GAT1	beta-1,3-glucuronyltransferase 1 (glucuronosyltransferase P)	gga00532:Chondroitin sulfate biosynthesis,gga00534:Heparan sulfate biosynthesis,
GT_EA606_A_87_P006367	-2.04303	0.00999002	ENSGALT00000017157	BIRC6	baculoviral IAP repeat-containing 6 (apollon)	gga04120:Ubiquitin mediated proteolysis,
GT_EA606_A_87_P133288	-1.83885	0.0436966	AY714349	BTC	betacellulin	gga04012:ErbB signaling pathway,
GT_EA606_A_87_P273963	-1.6627	0.0480057	NM_001004769	BTC	betacellulin	gga04012:ErbB signaling pathway,
GT_EA606_A_87_P025995	-3.10403	0.100301	ENSGALT00000033197	BTRC	beta-transducin repeat containing	gga04114:Oocyte meiosis,gga04120:Ubiquitin mediated proteolysis,gga04310:Wnt signaling pathway,gga04340:Hedgehog signaling pathway,
GT_EA606_A_87_P036771	-2.48765	0.0468041	NM_001006272	CAB39L	calcium binding protein 39-like	gga04150:mTOR signaling pathway,
GT_EA606_A_87_P024685	-1.63475	0.0868527	NM_001177322	CACNA2D1	calcium channel, voltage-dependent, alpha 2/delta subunit 1; similar to voltage-gated calcium channel alpha2/delta-1 subunit	gga04010:MAPK signaling pathway,gga04260:Cardiac muscle contraction,
GT_EA606_A_87_P015166	-2.11984	0.0116522	CR388882	CADM1	similar to secretory isoform of TSLC1; cell adhesion molecule 1	gga04514:Cell adhesion molecules (CAMs),
GT_EA606_A_87_P124058	-2.36241	0.028502	CR389565	CADM1	similar to secretory isoform of TSLC1; cell adhesion molecule 1	gga04514:Cell adhesion molecules (CAMs),
GT_EA606_A_87_P023516	-2.48002	0.0416165	ENSGALT00000002653	CD276	CD276 molecule	gga04514:Cell adhesion molecules (CAMs),
GT_EA606_A_87_P017727	-1.66684	0.0283764	ENSGALT00000003718	CDO1	cysteine dioxygenase, type I	gga00270:Cysteine and methionine metabolism,gga00430:Taurine and hypotaurine metabolism,
GT_EA606_A_87_P126103	-1.65206	0.0176414	ENSGALT00000012141	CETN2	centrin, EF-hand protein, 2	gga03420:Nucleotide excision repair,
GT_EA606_A_87_P082626	-2.71372	0.228649	ENSGALT00000018346	CHPF	chondroitin polymerizing factor	gga00532:Chondroitin sulfate biosynthesis,
GT_EA606_A_87_P051996	-1.60519	0.0518826	NM_204980	CHRD	chordin	gga04350:TGF-beta signaling pathway,
GT_EA606_A_87_P123161	-1.30622	0.0831791	NM_204980	CHRD	chordin	gga04350:TGF-beta signaling pathway,
GT_EA606_A_87_P173403	-2.36097	0.182176	XM_413889	CHSY1	chondroitin sulfate synthase 1	gga00532:Chondroitin sulfate biosynthesis,
GT_EA606_A_87_P009849	-2.89212	0.0598818	CV862724	CKB	creatine kinase, brain	gga00330:Arginine and proline metabolism,
GT_EA606_A_87_P057171	-1.70784	0.0324893	NM_205507	CKM	M-CK	gga00330:Arginine and proline metabolism,
GT_EA606_A_87_P252278	-1.41519	0.0431744	NM_205507	CKM	M-CK	gga00330:Arginine and proline metabolism,
GT_EA606_A_87_P009212	-1.79524	0.11595	NM_204182	CKMT1A	creatine kinase, mitochondrial 1A	gga00330:Arginine and proline metabolism,
GT_EA606_A_87_P077876	-1.9063	0.0141246	ENSGALT00000015235	CLDN11	claudin 11 (oligodendrocyte transmembrane protein)	gga04514:Cell adhesion molecules (CAMs),gga04530:Tight junction,
GT_EA606_A_87_P065001	-1.84039	0.0408235	ENSGALT00000011222	CLDN22	claudin 22	gga04514:Cell adhesion molecules (CAMs),gga04530:Tight junction,
GT_EA606_A_87_P141393	-1.54183	0.148499	NM_204201	CLDN5	claudin 5	gga04514:Cell adhesion molecules (CAMs),gga04530:Tight junction,
GT_EA606_A_87_P030630	-1.54451	0.0648313	ENSGALT00000001983	CLTCL1	clathrin, heavy chain-like 1	gga04142:Lysosome,gga04144:Endocytosis,
GT_EA606_A_87_P009158	-3.32425	0.191184	NM_205380	COL3A1	collagen, type III, alpha 1	gga04510:Focal adhesion,gga04512:ECM-receptor interaction,
GT_EA606_A_87_P081646	-2.45061	0.171621	NM_205380	COL3A1	collagen, type III, alpha 1	gga04510:Focal adhesion,gga04512:ECM-receptor interaction,
GT_EA606_A_87_P181983	-2.24812	0.224145	NM_205380	COL3A1	collagen, type III, alpha 1	gga04510:Focal adhesion,gga04512:ECM-receptor interaction,
GT_EA606_A_87_P191688	-2.68775	0.174121	U07973	COL3A1	collagen, type III, alpha 1	gga04510:Focal adhesion,gga04512:ECM-receptor interaction,
GT_EA606_A_87_P238018	-2.61235	0.126946	NM_205380	COL3A1	collagen, type III, alpha 1	gga04510:Focal adhesion,gga04512:ECM-receptor interaction,
GT_EA606_A_87_P115598	-2.79876	0.0716356	NM_001162399	COL4A1	collagen, type IV, alpha 1	gga04510:Focal adhesion,gga04512:ECM-receptor interaction,
GT_EA606_A_87_P020522	-2.7637	0.245229	NM_001162390	COL4A2	collagen, type IV, alpha 2	gga04510:Focal adhesion,gga04512:ECM-receptor interaction,
GT_EA606_A_87_P191383	-1.42871	0.0493568	ENSGALT00000003954	COL5A2	collagen, type V, alpha 2	gga04510:Focal adhesion,gga04512:ECM-receptor interaction,
GT_EA606_A_87_P024267	-2.94815	0.152716	BX930519	COMP	cartilage oligomeric matrix protein	gga04350:TGF-beta signaling pathway,gga04510:Focal adhesion,gga04512:ECM-receptor interaction,
GT_EA606_A_87_P027905	-1.38181	0.050468	ENSGALT00000005192	COMP	cartilage oligomeric matrix protein	gga04350:TGF-beta signaling pathway,gga04510:Focal adhesion,gga04512:ECM-receptor interaction,
GT_EA606_A_87_P119983	-1.55932	0.0118507	CR353695	COMP	cartilage oligomeric matrix protein	gga04350:TGF-beta signaling pathway,gga04510:Focal adhesion,gga04512:ECM-receptor interaction,
GT_EA606_A_87_P068926	-1.60026	0.0232462	ENSGALT00000003148	COMT	catechol-O-methyltransferase	gga00140:Steroid hormone biosynthesis,gga00350:Tyrosine metabolism,
GT_EA606_A_87_P293708	-1.76968	0.0157495	ENSGALT00000003148	COMT	catechol-O-methyltransferase	gga00140:Steroid hormone biosynthesis,gga00350:Tyrosine metabolism,
GT_EA606_A_87_P146798	-3.07667	0.201371	DR410805	COX4I1	cytochrome c oxidase subunit IV isoform 1	gga00190:Oxidative phosphorylation,gga04260:Cardiac muscle contraction,
GT_EA606_A_87_P088916	-1.54837	0.0590757	ENSGALT00000021953	COX8A	cytochrome c oxidase subunit 8A (ubiquitous)	gga00190:Oxidative phosphorylation,gga04260:Cardiac muscle contraction,
GT_EA606_A_87_P084246	-1.79125	0.155298	ENSGALT00000011466	CPT1A	carnitine palmitoyltransferase 1A (liver)	gga00071:Fatty acid metabolism,gga03320:PPAR signaling pathway,gga04920:Adipocytokine signaling pathway,
GT_EA606_A_87_P000759	-1.79338	0.0336241	ENSGALT00000038248	DAAM2	dishevelled associated activator of morphogenesis 2	gga04310:Wnt signaling pathway,
GT_EA606_A_87_P022805	-1.99156	0.104019	ENSGALT00000016346	DAAM2	dishevelled associated activator of morphogenesis 2	gga04310:Wnt signaling pathway,
GT_EA606_A_87_P112188	-1.6489	0.0279604	NM_001030800	DDX3X	DEAD (Asp-Glu-Ala-Asp) box polypeptide 3, X-linked	gga04622:RIG-I-like receptor signaling pathway,
GT_EA606_A_87_P297388	-2.2939	0.202984	NM_001030800	DDX3X	DEAD (Asp-Glu-Ala-Asp) box polypeptide 3, X-linked	gga04622:RIG-I-like receptor signaling pathway,
GT_EA606_A_87_P022840	-1.7068	0.00984937	BX933862	DDX46	DEAD (Asp-Glu-Ala-Asp) box polypeptide 46	gga03040:Spliceosome,
GT_EA606_A_87_P036593	-1.27613	0.0392191	NM_001006319	DDX6	DEAD (Asp-Glu-Ala-Asp) box polypeptide 6	gga03018:RNA degradation,
GT_EA606_A_87_P101681	-1.3741	0.00519819	ENSGALT00000017542	DGKB	diacylglycerol kinase, beta 90kDa	gga00561:Glycerolipid metabolism,gga00564:Glycerophospholipid metabolism,gga04070:Phosphatidylinositol signaling system,
GT_EA606_A_87_P227763	-2.47167	0.00835259	ENSGALT00000027368	DIS3	DIS3 mitotic control homolog (S. cerevisiae)	gga03018:RNA degradation,
GT_EA606_A_87_P263293	-2.05576	0.0600485	ENSGALT00000024130	DSE	dermatan sulfate epimerase	gga00532:Chondroitin sulfate biosynthesis,
GT_EA606_A_87_P052576	-2.34363	0.178093	NM_001083360	EDA2R	ectodysplasin A2 receptor	gga04060:Cytokine-cytokine receptor interaction,
GT_EA606_A_87_P031622	-1.24287	0.0391399	ENSGALT00000018404	EEA1	early endosome antigen 1	gga04144:Endocytosis,
GT_EA606_A_87_P319677	-1.64582	0.00470473	NM_001197308	ELOVL2	elongation of very long chain fatty acids (FEN1/Elo2, SUR4/Elo3, yeast)-like 2	gga01040:Biosynthesis of unsaturated fatty acids,
GT_EA606_A_87_P024441	-1.42835	0.0529929	ENSGALT00000016585	ENTPD5	ectonucleoside triphosphate diphosphohydrolase 5	gga00230:Purine metabolism,gga00240:Pyrimidine metabolism,
GT_EA606_A_87_P035867	-4.11447	0.0307403	XM_001232112	EPB41L2	erythrocyte membrane protein band 4.1-like 2	gga04530:Tight junction,
GT_EA606_A_87_P127233	-3.01088	0.0391508	NM_001031283	EPS15	epidermal growth factor receptor pathway substrate 15	gga04144:Endocytosis,
GT_EA606_A_87_P023582	-3.08349	0.0870719	NM_001199320	EXOC4	exocyst complex component 4	gga04530:Tight junction,
GT_EA606_A_87_P035679	-2.11296	0.0593645	NM_001031349	EXT2	similar to Exostoses (multiple) 2; exostoses (multiple) 2	gga00534:Heparan sulfate biosynthesis,
GT_EA606_A_87_P034288	-1.44019	0.0435399	ENSGALT00000011686	FGF12	fibroblast growth factor 12	gga04010:MAPK signaling pathway,gga04810:Regulation of actin cytoskeleton,
GT_EA606_A_87_P035954	-2.15777	0.00482296	NM_001030719	FLOT2	flotillin 2	gga04910:Insulin signaling pathway,
GT_EA606_A_87_P096176	-3.30692	0.0764768	ENSGALT00000022968	GABRA4	gamma-aminobutyric acid (GABA) A receptor, alpha 4	gga04080:Neuroactive ligand-receptor interaction,
GT_EA606_A_87_P110255	-2.38496	0.0387652	ENSGALT00000030257	GABRG3	gamma-aminobutyric acid (GABA) A receptor, gamma 3	gga04080:Neuroactive ligand-receptor interaction,
GT_EA606_A_87_P009667	-1.35139	0.0532662	NM_001044678	GADD45A	growth arrest and DNA-damage-inducible, alpha	gga04010:MAPK signaling pathway,gga04110:Cell cycle,gga04115:p53 signaling pathway,
GT_EA606_A_87_P114053	-2.68597	0.012351	ENSGALT00000020475	GALNT13	UDP-N-acetyl-alpha-D-galactosamine:polypeptide N-acetylgalactosaminyltransferase 13 (GalNAc-T13)	gga00512:O-Glycan biosynthesis,
GT_EA606_A_87_P238043	-3.30324	0.103289	ENSGALT00000020475	GALNT13	UDP-N-acetyl-alpha-D-galactosamine:polypeptide N-acetylgalactosaminyltransferase 13 (GalNAc-T13)	gga00512:O-Glycan biosynthesis,
GT_EA606_A_87_P123628	-2.44987	0.0105066	CR389122	GALNTL1	UDP-N-acetyl-alpha-D-galactosamine:polypeptide N-acetylgalactosaminyltransferase-like 1	gga00512:O-Glycan biosynthesis,
GT_EA606_A_87_P021555	-2.02029	0.0704603	ENSGALT00000026256	GK	glycerol kinase	gga00561:Glycerolipid metabolism,gga03320:PPAR signaling pathway,
GT_EA606_A_87_P016964	-1.45475	0.024134	ENSGALT00000005344	HERC1	hect (homologous to the E6-AP (UBE3A) carboxyl terminus) domain and RCC1 (CHC1)-like domain (RLD) 1	gga04120:Ubiquitin mediated proteolysis,
GT_EA606_A_87_P015597	-2.42743	0.0622324	NM_001252376	HERC2	hect domain and RLD 2	gga04120:Ubiquitin mediated proteolysis,
GT_EA606_A_87_P017039	-3.16969	0.0851387	NM_001252376	HERC2	hect domain and RLD 2	gga04120:Ubiquitin mediated proteolysis,
GT_EA606_A_87_P222493	-2.66674	0.0478922	NM_001252376	HERC2	hect domain and RLD 2	gga04120:Ubiquitin mediated proteolysis,
GT_EA606_A_87_P247288	-2.30234	0.0949806	NM_001252376	HERC2	hect domain and RLD 2	gga04120:Ubiquitin mediated proteolysis,
GT_EA606_A_87_P111233	-1.23245	0.0228099	NM_204902	HMGB1	high-mobility group box 1	gga03410:Base excision repair,
GT_EA606_A_87_P031965	-1.43378	0.0488576	ENSGALT00000004681	HMGCS2	3-hydroxy-3-methylglutaryl-Coenzyme A synthase 2 (mitochondrial)	gga00072:Synthesis and degradation of ketone bodies,gga00280:Valine, leucine and isoleucine degradation,gga00650:Butanoate metabolism,gga00900:Terpenoid backbone biosynthesis,
GT_EA606_A_87_P067096	-1.60374	0.0782673	ENSGALT00000039288	HS3ST3A1	heparan sulfate (glucosamine) 3-O-sulfotransferase 3A1; similar to heparan sulfate D-glucosaminyl 3-O-sulfotransferase-3B	gga00531:Glycosaminoglycan degradation,gga00534:Heparan sulfate biosynthesis,
GT_EA606_A_87_P143028	-1.89476	0.152762	NM_001044674	IL11RA	interleukin 11 receptor, alpha	gga04060:Cytokine-cytokine receptor interaction,gga04630:Jak-STAT signaling pathway,
GT_EA606_A_87_P022518	-2.31173	0.159618	ENSGALT00000027049	INPP4A	inositol polyphosphate-4-phosphatase, type I, 107kDa	gga00562:Inositol phosphate metabolism,gga04070:Phosphatidylinositol signaling system,
GT_EA606_A_87_P028048	-1.93925	0.157863	ENSGALT00000027049	INPP4A	inositol polyphosphate-4-phosphatase, type I, 107kDa	gga00562:Inositol phosphate metabolism,gga04070:Phosphatidylinositol signaling system,
GT_EA606_A_87_P007331	-3.14287	0.0507425	ENSGALT00000016060	INPP4B	inositol polyphosphate-4-phosphatase, type II, 105kDa	gga00562:Inositol phosphate metabolism,gga04070:Phosphatidylinositol signaling system,
GT_EA606_A_87_P022308	-2.92608	0.0655007	ENSGALT00000016060	INPP4B	inositol polyphosphate-4-phosphatase, type II, 105kDa	gga00562:Inositol phosphate metabolism,gga04070:Phosphatidylinositol signaling system,
GT_EA606_A_87_P174568	-2.12137	0.0313833	XM_415418	INPP5E	inositol polyphosphate-5-phosphatase, 72 kDa	gga00562:Inositol phosphate metabolism,gga04070:Phosphatidylinositol signaling system,
GT_EA606_A_87_P022209	-3.05224	0.158892	ENSGALT00000003027	ITCH	itchy homolog E3 ubiquitin protein ligase (mouse)	gga04120:Ubiquitin mediated proteolysis,gga04144:Endocytosis,
GT_EA606_A_87_P035415	-2.07445	0.118346	NM_001146132	LAMP3	lysosomal-associated membrane protein 3	gga04142:Lysosome,
GT_EA606_A_87_P112203	-3.73536	0.170802	NM_204573	LOC395260	cgABP260	gga04010:MAPK signaling pathway,gga04510:Focal adhesion,
GT_EA606_A_87_P308495	-1.53178	0.158649	NM_204573	LOC395260	cgABP260	gga04010:MAPK signaling pathway,gga04510:Focal adhesion,
GT_EA606_A_87_P094451	-3.35772	0.0532433	ENSGALT00000012549	LOC422323	similar to WAS protein family, member 3	gga04520:Adherens junction,
GT_EA606_A_87_P168763	-3.4468	0.136581	ENSGALT00000012549	LOC422323	similar to WAS protein family, member 3	gga04520:Adherens junction,
GT_EA606_A_87_P030601	-1.43398	0.0568768	NM_001199540	MAGI2	membrane associated guanylate kinase, WW and PDZ domain containing 2	gga04530:Tight junction,
GT_EA606_A_87_P013764	-2.2859	0.0941588	ENSGALT00000009539	MAML1	mastermind-like 1 (Drosophila)	gga04330:Notch signaling pathway,
GT_EA606_A_87_P094906	-3.07566	0.139554	ENSGALT00000015954	MAML3	mastermind-like 3 (Drosophila)	gga04330:Notch signaling pathway,
GT_EA606_A_87_P291368	-1.46657	0.0827219	ENSGALT00000014774	MAN1B1	mannosidase, alpha, class 1B, member 1	gga00510:N-Glycan biosynthesis,
GT_EA606_A_87_P028953	-3.33388	0.0326882	XM_424591	MAPK8IP3	mitogen-activated protein kinase 8 interacting protein 3	gga04010:MAPK signaling pathway,
GT_EA606_A_87_P072331	-2.70035	0.0996679	ENSGALT00000002721	MAPK8IP3	mitogen-activated protein kinase 8 interacting protein 3	gga04010:MAPK signaling pathway,
GT_EA606_A_87_P253248	-2.4827	0.115523	ENSGALT00000002721	MAPK8IP3	mitogen-activated protein kinase 8 interacting protein 3	gga04010:MAPK signaling pathway,
GT_EA606_A_87_P073541	-3.30122	0.0421669	ENSGALT00000003585	MAPKAPK3	mitogen-activated protein kinase-activated protein kinase 3	gga04010:MAPK signaling pathway,gga04370:VEGF signaling pathway,
GT_EA606_A_87_P164783	-3.18442	0.053502	ENSGALT00000003585	MAPKAPK3	mitogen-activated protein kinase-activated protein kinase 3	gga04010:MAPK signaling pathway,gga04370:VEGF signaling pathway,
GT_EA606_A_87_P062851	-2.43687	0.166418	NM_001199193	MAPT	microtubule-associated protein tau	gga04010:MAPK signaling pathway,
GT_EA606_A_87_P115443	-3.51819	0.0217872	NM_001199193	MAPT	microtubule-associated protein tau	gga04010:MAPK signaling pathway,
GT_EA606_A_87_P023653	-1.9014	0.0234261	ENSGALT00000000908	MDM4	Mdm4, transformed 3T3 cell double minute 4, p53 binding protein (mouse)	gga04115:p53 signaling pathway,
GT_EA606_A_87_P125033	-1.52105	0.117064	CR390611	MGLL	monoglyceride lipase	gga00561:Glycerolipid metabolism,
GT_EA606_A_87_P142198	-2.3348	0.0100425	ENSGALT00000040946	MINPP1	multiple inositol polyphosphate histidine phosphatase, 1	gga00562:Inositol phosphate metabolism,
GT_EA606_A_87_P122908	-2.0595	0.0706602	ENSGALT00000037676	MLLT4	myeloid/lymphoid or mixed-lineage leukemia (trithorax homolog, Drosophila); translocated to, 4	gga04520:Adherens junction,gga04530:Tight junction,
GT_EA606_A_87_P033053	-1.2571	0.0455853	NM_001199705	MPP5	membrane protein, palmitoylated 5 (MAGUK p55 subfamily member 5)	gga04530:Tight junction,
GT_EA606_A_87_P056161	-2.34544	0.0748422	NM_205392	MYLK2	myosin light chain kinase 2, skeletal muscle	gga04020:Calcium signaling pathway,gga04270:Vascular smooth muscle contraction,gga04510:Focal adhesion,gga04810:Regulation of actin cytoskeleton,
GT_EA606_A_87_P247808	-1.75374	0.00157863	XM_415107	NCOR2	nuclear receptor co-repressor 2	gga04330:Notch signaling pathway,
GT_EA606_A_87_P024290	-1.93802	0.0471955	BX930452	NDUFB2	NADH dehydrogenase (ubiquinone) 1 beta subcomplex, 2, 8kDa	gga00190:Oxidative phosphorylation,
GT_EA606_A_87_P024096	-1.72944	0.090497	ENSGALT00000039007	NF1	neurofibromin 1	gga04010:MAPK signaling pathway,
GT_EA606_A_87_P066826	-2.4637	0.230486	ENSGALT00000039006	NF1	neurofibromin 1	gga04010:MAPK signaling pathway,
GT_EA606_A_87_P026041	-2.13306	0.160568	NM_001199000	NFAT5	nuclear factor of activated T-cells 5, tonicity-responsive	gga04310:Wnt signaling pathway,gga04370:VEGF signaling pathway,gga04650:Natural killer cell mediated cytotoxicity,
GT_EA606_A_87_P033945	-2.93989	0.193232	NM_001199000	NFAT5	nuclear factor of activated T-cells 5, tonicity-responsive	gga04310:Wnt signaling pathway,gga04370:VEGF signaling pathway,gga04650:Natural killer cell mediated cytotoxicity,
GT_EA606_A_87_P075371	-2.04661	0.0881831	NM_001199000	NFAT5	nuclear factor of activated T-cells 5, tonicity-responsive	gga04310:Wnt signaling pathway,gga04370:VEGF signaling pathway,gga04650:Natural killer cell mediated cytotoxicity,
GT_EA606_A_87_P148758	-1.66364	0.0220224	XM_422052	NHEJ1	nonhomologous end-joining factor 1	gga03450:Non-homologous end-joining,
GT_EA606_A_87_P083456	-1.47516	0.0239199	ENSGALT00000008274	NLRP3	NLR family, pyrin domain containing 3	gga04621:NOD-like receptor signaling pathway,
GT_EA606_A_87_P196623	-2.02672	0.0536749	ENSGALT00000008274	NLRP3	NLR family, pyrin domain containing 3	gga04621:NOD-like receptor signaling pathway,
GT_EA606_A_87_P003373	-1.52894	0.0164663	EU702428	NRXN3	neurexin 3	gga04514:Cell adhesion molecules (CAMs),
GT_EA606_A_87_P085441	-2.20712	0.00190072	ENSGALT00000017127	NRXN3	neurexin 3	gga04514:Cell adhesion molecules (CAMs),
GT_EA606_A_87_P015049	-1.44624	0.122007	ENSGALT00000004699	NSD1	nuclear receptor binding SET domain protein 1	gga00310:Lysine degradation,
GT_EA606_A_87_P018055	-2.4639	0.201706	CR353264	NSD1	nuclear receptor binding SET domain protein 1	gga00310:Lysine degradation,
GT_EA606_A_87_P072856	-2.20581	0.200373	ENSGALT00000004699	NSD1	nuclear receptor binding SET domain protein 1	gga00310:Lysine degradation,
GT_EA606_A_87_P009804	-1.43474	0.214451	NM_205128	OCLN	occludin	gga04514:Cell adhesion molecules (CAMs),gga04530:Tight junction,
GT_EA606_A_87_P093946	-1.36985	0.0104223	ENSGALT00000008713	OGT	O-linked N-acetylglucosamine (GlcNAc) transferase (UDP-N-acetylglucosamine:polypeptide-N-acetylglucosaminyl transferase)	gga00512:O-Glycan biosynthesis,
GT_EA606_A_87_P195998	-1.15457	0.00263896	ENSGALT00000008713	OGT	O-linked N-acetylglucosamine (GlcNAc) transferase (UDP-N-acetylglucosamine:polypeptide-N-acetylglucosaminyl transferase)	gga00512:O-Glycan biosynthesis,
GT_EA606_A_87_P199933	-1.45457	0.00418715	ENSGALT00000008713	OGT	O-linked N-acetylglucosamine (GlcNAc) transferase (UDP-N-acetylglucosamine:polypeptide-N-acetylglucosaminyl transferase)	gga00512:O-Glycan biosynthesis,
GT_EA606_A_87_P216628	-2.49802	0.095529	ENSGALT00000008713	OGT	O-linked N-acetylglucosamine (GlcNAc) transferase (UDP-N-acetylglucosamine:polypeptide-N-acetylglucosaminyl transferase)	gga00512:O-Glycan biosynthesis,
GT_EA606_A_87_P244123	-2.68653	0.0605243	ENSGALT00000008713	OGT	O-linked N-acetylglucosamine (GlcNAc) transferase (UDP-N-acetylglucosamine:polypeptide-N-acetylglucosaminyl transferase)	gga00512:O-Glycan biosynthesis,
GT_EA606_A_87_P117798	-1.84074	0.157712	NM_001012950	PAPD7	similar to polymerase (DNA directed) sigma; polymerase (DNA directed) sigma	gga03018:RNA degradation,
GT_EA606_A_87_P311522	-2.43801	0.0631872	NM_001012950	PAPD7	similar to polymerase (DNA directed) sigma; polymerase (DNA directed) sigma	gga03018:RNA degradation,
GT_EA606_A_87_P034078	-1.47285	0.0300576	NM_001039280	PARD3	par-3 partitioning defective 3 homolog (C. elegans)	gga04080:Neuroactive ligand-receptor interaction,gga04144:Endocytosis,gga04520:Adherens junction,gga04530:Tight junction,
GT_EA606_A_87_P098631	-1.72447	0.216581	ENSGALT00000018857	PARK2	Parkinson disease (autosomal recessive, juvenile) 2, parkin	gga04120:Ubiquitin mediated proteolysis,
GT_EA606_A_87_P022335	-1.13421	0.0199694	ENSGALT00000017547	PARS2	prolyl-tRNA synthetase 2, mitochondrial (putative)	gga00970:Aminoacyl-tRNA biosynthesis,
GT_EA606_A_87_P021990	-2.37187	0.0336163	BX935702	PDE9A	phosphodiesterase 9A	gga00230:Purine metabolism,
GT_EA606_A_87_P082451	-1.46296	0.0714719	ENSGALT00000033212	PHOSPHO2	phosphatase, orphan 2	gga00750:Vitamin B6 metabolism,
GT_EA606_A_87_P236558	-1.96252	0.164853	ENSGALT00000009877	PIK3C2A	phosphoinositide-3-kinase, class 2, alpha polypeptide	gga00562:Inositol phosphate metabolism,gga04070:Phosphatidylinositol signaling system,
GT_EA606_A_87_P014856	-2.11919	0.0267365	ENSGALT00000023868	PIK3R1	phosphoinositide-3-kinase, regulatory subunit 1 (p85 alpha)	gga04012:ErbB signaling pathway,gga04070:Phosphatidylinositol signaling system,gga04150:mTOR signaling pathway,gga04210:Apoptosis,gga04370:VEGF signaling pathway,gga04510:Focal adhesion,gga04620:Toll-like receptor signaling pathway,gga04630:Jak-STAT signa
GT_EA606_A_87_P092096	-4.18241	0.143763	ENSGALT00000023868	PIK3R1	phosphoinositide-3-kinase, regulatory subunit 1 (p85 alpha)	gga04012:ErbB signaling pathway,gga04070:Phosphatidylinositol signaling system,gga04150:mTOR signaling pathway,gga04210:Apoptosis,gga04370:VEGF signaling pathway,gga04510:Focal adhesion,gga04620:Toll-like receptor signaling pathway,gga04630:Jak-STAT signa
GT_EA606_A_87_P191858	-1.83262	0.108969	NM_001030697	PIK3R5	phosphoinositide-3-kinase, regulatory subunit 5, p101	gga04012:ErbB signaling pathway,gga04070:Phosphatidylinositol signaling system,gga04150:mTOR signaling pathway,gga04210:Apoptosis,gga04370:VEGF signaling pathway,gga04510:Focal adhesion,gga04620:Toll-like receptor signaling pathway,gga04630:Jak-STAT signa
GT_EA606_A_87_P018011	-2.39445	0.105202	ENSGALT00000009322	PLCD1	phospholipase C, delta 1	gga00562:Inositol phosphate metabolism,gga04020:Calcium signaling pathway,gga04070:Phosphatidylinositol signaling system,
GT_EA606_A_87_P100986	-2.76926	0.0176875	ENSGALT00000009322	PLCD1	phospholipase C, delta 1	gga00562:Inositol phosphate metabolism,gga04020:Calcium signaling pathway,gga04070:Phosphatidylinositol signaling system,
GT_EA606_A_87_P034890	-2.26307	0.0528738	NM_001127439	PLIN1	perilipin	gga03320:PPAR signaling pathway,
GT_EA606_A_87_P024088	-3.95446	0.1488	ENSGALT00000020649	POLR3B	polymerase (RNA) III (DNA directed) polypeptide B	gga00230:Purine metabolism,gga00240:Pyrimidine metabolism,gga03020:RNA polymerase,gga04623:Cytosolic DNA-sensing pathway,
GT_EA606_A_87_P093181	-1.30317	0.00562738	ENSGALT00000023611	POLR3G	polymerase (RNA) III (DNA directed) polypeptide G (32kD)	gga00230:Purine metabolism,gga00240:Pyrimidine metabolism,gga03020:RNA polymerase,gga04623:Cytosolic DNA-sensing pathway,
GT_EA606_A_87_P079561	-2.85456	0.0114692	NM_001130488	PPAP2B	phosphatidic acid phosphatase type 2B	gga00561:Glycerolipid metabolism,gga00564:Glycerophospholipid metabolism,gga00565:Ether lipid metabolism,gga00600:Sphingolipid metabolism,
GT_EA606_A_87_P267258	-2.30622	0.0475962	NM_001130488	PPAP2B	phosphatidic acid phosphatase type 2B	gga00561:Glycerolipid metabolism,gga00564:Glycerophospholipid metabolism,gga00565:Ether lipid metabolism,gga00600:Sphingolipid metabolism,
GT_EA606_A_87_P012555	-1.12027	0.0206755	ENSGALT00000008505	PPM1D	protein phosphatase 1D magnesium-dependent, delta isoform	gga04115:p53 signaling pathway,
GT_EA606_A_87_P009183	-2.91337	0.0377507	NM_205123	PPP1R12A	protein phosphatase 1, regulatory (inhibitor) subunit 12A	gga04270:Vascular smooth muscle contraction,gga04510:Focal adhesion,gga04810:Regulation of actin cytoskeleton,
GT_EA606_A_87_P024577	-2.26701	0.100943	ENSGALT00000018673	PPP1R3B	protein phosphatase 1, regulatory (inhibitor) subunit 3B	gga04910:Insulin signaling pathway,
GT_EA606_A_87_P085946	-1.167	0.0162741	ENSGALT00000037391	PPP2R5E	protein phosphatase 2, regulatory subunit B', epsilon isoform	gga04114:Oocyte meiosis,gga04310:Wnt signaling pathway,
GT_EA606_A_87_P028003	-2.99224	0.175897	ENSGALT00000015558	PRICKLE1	prickle homolog 1 (Drosophila)	gga04310:Wnt signaling pathway,
GT_EA606_A_87_P106303	-1.84499	0.02183	ENSGALT00000015558	PRICKLE1	prickle homolog 1 (Drosophila)	gga04310:Wnt signaling pathway,
GT_EA606_A_87_P074161	-3.86376	0.0706588	ENSGALT00000011865	PRICKLE2	prickle homolog 2 (Drosophila)	gga04310:Wnt signaling pathway,
GT_EA606_A_87_P009692	-2.04543	0.0419437	DQ133597	PRKAG1	protein kinase, AMP-activated, gamma 1 non-catalytic subunit	gga04910:Insulin signaling pathway,gga04920:Adipocytokine signaling pathway,
GT_EA606_A_87_P023812	-1.59967	0.178977	ENSGALT00000003064	PRPF38B	PRP38 pre-mRNA processing factor 38 (yeast) domain containing B	gga03040:Spliceosome,
GT_EA606_A_87_P078231	-1.14033	0.105014	ENSGALT00000040337	PRPF38B	PRP38 pre-mRNA processing factor 38 (yeast) domain containing B	gga03040:Spliceosome,
GT_EA606_A_87_P201693	-2.05378	0.122184	ENSGALT00000004650	PRPF8	PRP8 pre-mRNA processing factor 8 homolog (S. cerevisiae)	gga03040:Spliceosome,
GT_EA606_A_87_P150763	-3.63692	0.137477	XM_414229	PSMD7	proteasome (prosome, macropain) 26S subunit, non-ATPase, 7 (Mov34 homolog)	gga03050:Proteasome,
GT_EA606_A_87_P122043	-3.102	0.0979441	CR386808	PTPRF	protein tyrosine phosphatase, receptor type, F	gga04514:Cell adhesion molecules (CAMs),gga04520:Adherens junction,gga04910:Insulin signaling pathway,
GT_EA606_A_87_P018010	-1.63148	0.0303971	ENSGALT00000015143	RAB11FIP2	RAB11 family interacting protein 2 (class I)	gga04144:Endocytosis,
GT_EA606_A_87_P287568	-2.18195	0.124826	NM_001030950	RAD21	RAD21 homolog (S. pombe)	gga04110:Cell cycle,
GT_EA606_A_87_P018559	-2.86562	0.167857	ENSGALT00000002032	RBL1	retinoblastoma-like 1 (p107)	gga04110:Cell cycle,gga04350:TGF-beta signaling pathway,
GT_EA606_A_87_P022389	-1.5867	0.0068182	BX934828	RETSAT	retinol saturase (all-trans-retinol 13,14-reductase)	gga00830:Retinol metabolism,
GT_EA606_A_87_P062991	-1.22595	0.00989303	ENSGALT00000002496	RPL23	ribosomal protein L23	gga03010:Ribosome,
GT_EA606_A_87_P125043	-1.29491	0.0177548	ENSGALT00000002496	RPL23	ribosomal protein L23	gga03010:Ribosome,
GT_EA606_A_87_P021662	-2.96731	0.248525	BX950362	SETD2	SET domain containing 2	gga00310:Lysine degradation,
GT_EA606_A_87_P023051	-2.68991	0.18621	ENSGALT00000008839	SETD2	SET domain containing 2	gga00310:Lysine degradation,
GT_EA606_A_87_P197318	-2.36725	0.106274	ENSGALT00000008839	SETD2	SET domain containing 2	gga00310:Lysine degradation,
GT_EA606_A_87_P050116	-1.79199	0.19158	NM_001004397	SF3A2	splicing factor 3a, subunit 2, 66kDa	gga03040:Spliceosome,
GT_EA606_A_87_P209108	-1.97643	0.0233046	ENSGALT00000013044	SF3B1	splicing factor 3b, subunit 1, 155kDa	gga03040:Spliceosome,
GT_EA606_A_87_P060776	-1.77562	0.0337403	ENSGALT00000021786	SF3B4	splicing factor 3b, subunit 4, 49kDa	gga03040:Spliceosome,
GT_EA606_A_87_P299058	-1.36592	0.102447	ENSGALT00000021786	SF3B4	splicing factor 3b, subunit 4, 49kDa	gga03040:Spliceosome,
GT_EA606_A_87_P080941	-1.91343	0.0760894	ENSGALT00000012149	SFRP5	secreted frizzled-related protein 5	gga04310:Wnt signaling pathway,
GT_EA606_A_87_P188963	-1.6457	0.0594422	NM_001030805	SH3KBP1	SH3-domain kinase binding protein 1	gga04144:Endocytosis,
GT_EA606_A_87_P025943	-1.35658	0.0019893	ENSGALT00000013945	SMNDC1	survival motor neuron domain containing 1	gga03040:Spliceosome,
GT_EA606_A_87_P074401	-4.16291	0.00548185	ENSGALT00000001131	SMPD3	sphingomyelin phosphodiesterase 3, neutral membrane (neutral sphingomyelinase II)	gga00600:Sphingolipid metabolism,
GT_EA606_A_87_P090456	-3.04341	0.0574293	ENSGALT00000023395	SMUG1	single-strand-selective monofunctional uracil-DNA glycosylase 1	gga03410:Base excision repair,
GT_EA606_A_87_P212133	-1.36019	0.0282105	NM_001199666	SNAP23	synaptosomal-associated protein, 23kDa	gga04130:SNARE interactions in vesicular transport,
GT_EA606_A_87_P246378	-2.50075	0.00481186	NM_001199108	SOCS4	suppressor of cytokine signaling 4	gga04630:Jak-STAT signaling pathway,gga04910:Insulin signaling pathway,
GT_EA606_A_87_P001424	-3.07651	0.0354013	ENSGALT00000008603	SORBS1	sorbin and SH3 domain containing 1	gga03320:PPAR signaling pathway,gga04520:Adherens junction,gga04910:Insulin signaling pathway,
GT_EA606_A_87_P033878	-2.53701	0.155972	ENSGALT00000008603	SORBS1	sorbin and SH3 domain containing 1	gga03320:PPAR signaling pathway,gga04520:Adherens junction,gga04910:Insulin signaling pathway,
GT_EA606_A_87_P193483	-1.6744	0.084572	NM_001039326	SOX17	SRY (sex determining region Y)-box 17	gga04310:Wnt signaling pathway,
GT_EA606_A_87_P037449	-1.88817	0.0908485	NM_204604	SP1	Sp1 transcription factor	gga04350:TGF-beta signaling pathway,
GT_EA606_A_87_P089568	-2.2008	0.177071	NM_204604	SP1	Sp1 transcription factor	gga04350:TGF-beta signaling pathway,
GT_EA606_A_87_P002727	-1.85337	0.0345764	ENSGALT00000000717	SPIRE2	spire homolog 2 (Drosophila)	gga04320:Dorso-ventral axis formation,
GT_EA606_A_87_P242723	-4.15539	0.0336014	ENSGALT00000000717	SPIRE2	spire homolog 2 (Drosophila)	gga04320:Dorso-ventral axis formation,
GT_EA606_A_87_P017732	-2.31825	0.0450093	NM_001044656	SSX2IP	synovial sarcoma, X breakpoint 2 interacting protein	gga04520:Adherens junction,
GT_EA606_A_87_P010797	-1.94518	0.00524855	CR733202	STAMBP	STAM binding protein	gga04144:Endocytosis,
GT_EA606_A_87_P253468	-2.73681	0.0262646	ENSGALT00000006746	STAMBP	STAM binding protein	gga04144:Endocytosis,
GT_EA606_A_87_P264523	-2.34147	0.131969	ENSGALT00000008777	TAF1	TAF1 RNA polymerase II, TATA box binding protein (TBP)-associated factor, 250kDa	gga03022:Basal transcription factors,
GT_EA606_A_87_P018270	-2.93834	0.0607102	ENSGALT00000006492	TAOK1	TAO kinase 1	gga04010:MAPK signaling pathway,
GT_EA606_A_87_P238298	-1.44923	0.0945894	NM_001159754	TBL1X	transducin (beta)-like 1X-linked	gga04310:Wnt signaling pathway,
GT_EA606_A_87_P298628	-3.08137	0.066868	NM_001159754	TBL1X	transducin (beta)-like 1X-linked	gga04310:Wnt signaling pathway,
GT_EA606_A_87_P073361	-1.41336	0.083116	ENSGALT00000012177	TCERG1	transcription elongation regulator 1	gga03040:Spliceosome,
GT_EA606_A_87_P024385	-1.54519	0.016784	BX930258	THOC2	THO complex 2	gga03040:Spliceosome,
GT_EA606_A_87_P117708	-1.23619	0.0266785	ENSGALT00000013858	THOC2	THO complex 2	gga03040:Spliceosome,
GT_EA606_A_87_P199293	-1.53416	0.0410433	ENSGALT00000013858	THOC2	THO complex 2	gga03040:Spliceosome,
GT_EA606_A_87_P292353	-1.88089	0.00483925	ENSGALT00000013858	THOC2	THO complex 2	gga03040:Spliceosome,
GT_EA606_A_87_P029555	-3.1766	0.0743562	BU333473	THOC4	THO complex 4	gga03040:Spliceosome,
GT_EA606_A_87_P028937	-2.83926	0.0612326	ENSGALT00000025542	TIAM1	T-cell lymphoma invasion and metastasis 1	gga04810:Regulation of actin cytoskeleton,
GT_EA606_A_87_P024187	-2.5892	0.113483	ENSGALT00000016916	TJAP1	tight junction associated protein 1 (peripheral)	gga04530:Tight junction,
GT_EA606_A_87_P075946	-1.15419	0.0817362	ENSGALT00000006325	TJP1	tight junction protein 1 (zona occludens 1)	gga04520:Adherens junction,gga04530:Tight junction,gga04540:Gap junction,
GT_EA606_A_87_P072461	-2.33619	0.0766718	ENSGALT00000001250	TMEM173	transmembrane protein 173	gga04622:RIG-I-like receptor signaling pathway,gga04623:Cytosolic DNA-sensing pathway,
GT_EA606_A_87_P015299	-1.53064	0.0966192	CR388696	TNFRSF13B	tumor necrosis factor receptor superfamily, member 13B	gga04060:Cytokine-cytokine receptor interaction,gga04672:Intestinal immune network for IgA production,
GT_EA606_A_87_P056096	-1.48793	0.068355	NM_001097537	TNFRSF13B	tumor necrosis factor receptor superfamily, member 13B	gga04060:Cytokine-cytokine receptor interaction,gga04672:Intestinal immune network for IgA production,
GT_EA606_A_87_P114088	-1.61802	0.0236469	ENSGALT00000014665	TRAF2	TNF receptor-associated factor 2	gga04010:MAPK signaling pathway,gga04210:Apoptosis,gga04622:RIG-I-like receptor signaling pathway,gga04920:Adipocytokine signaling pathway,
GT_EA606_A_87_P023794	-3.42486	0.0175868	ENSGALT00000004623	TRIP12	thyroid hormone receptor interactor 12	gga04120:Ubiquitin mediated proteolysis,
GT_EA606_A_87_P196358	-3.25197	0.0491449	ENSGALT00000004623	TRIP12	thyroid hormone receptor interactor 12	gga04120:Ubiquitin mediated proteolysis,
GT_EA606_A_87_P234023	-1.85161	0.124097	ENSGALT00000004623	TRIP12	thyroid hormone receptor interactor 12	gga04120:Ubiquitin mediated proteolysis,
GT_EA606_A_87_P063801	-1.23622	0.172205	NM_205063	TSHB	thyroid stimulating hormone, beta	gga04080:Neuroactive ligand-receptor interaction,
GT_EA606_A_87_P063811	-2.03966	0.078991	NM_205063	TSHB	thyroid stimulating hormone, beta	gga04080:Neuroactive ligand-receptor interaction,
GT_EA606_A_87_P031692	-1.87136	0.0691978	ENSGALT00000007525	ULK2	unc-51-like kinase 2 (C. elegans)	gga04140:Regulation of autophagy,gga04150:mTOR signaling pathway,
GT_EA606_A_87_P034251	-1.09004	3.40665e-05	ENSGALT00000010196	UROC1	urocanase domain containing 1	gga00340:Histidine metabolism,
GT_EA606_A_87_P098721	-1.9062	0.176125	ENSGALT00000037597	UST	uronyl-2-sulfotransferase	gga00532:Chondroitin sulfate biosynthesis,
GT_EA606_A_87_P267913	-2.41323	0.0495346	ENSGALT00000027510	VPS36	vacuolar protein sorting 36 homolog (S. cerevisiae)	gga04144:Endocytosis,
GT_EA606_A_87_P280593	-1.71346	0.123764	ENSGALT00000027510	VPS36	vacuolar protein sorting 36 homolog (S. cerevisiae)	gga04144:Endocytosis,
GT_EA606_A_87_P034915	-2.11282	0.125136	ENSGALT00000024308	WASF1	WAS protein family, member 1	gga04520:Adherens junction,gga04810:Regulation of actin cytoskeleton,
GT_EA606_A_87_P023206	-2.31015	0.22205	ENSGALT00000022698	WASF2	similar to WASP-family protein	gga04520:Adherens junction,gga04810:Regulation of actin cytoskeleton,
GT_EA606_A_87_P023847	-2.1133	0.0240985	ENSGALT00000027626	WASF3	WAS protein family, member 3	gga04520:Adherens junction,
GT_EA606_A_87_P212768	-2.19438	0.0139924	ENSGALT00000027626	WASF3	WAS protein family, member 3	gga04520:Adherens junction,
GT_EA606_A_87_P120278	-3.08749	0.00552022	ENSGALT00000010275	XPC	xeroderma pigmentosum, complementation group C	gga03420:Nucleotide excision repair,
GT_EA606_A_87_P052701	-2.07101	0.177442	NM_001001785	XYLT2	xylosyltransferase II	gga00532:Chondroitin sulfate biosynthesis,gga00534:Heparan sulfate biosynthesis,
GT_EA606_A_87_P125593	-2.6235	0.226583	ENSGALT00000008724	ZCCHC7	zinc finger, CCHC domain containing 7	gga03018:RNA degradation,
GT_EA606_A_87_P079426	-1.67291	0.0822098	ENSGALT00000017269	ZFYVE9	zinc finger, FYVE domain containing 9	gga04350:TGF-beta signaling pathway,

## Sheet: 18 up pathways
Probe Set IDs	Fold change	p-value	Accession number	Gene ID	Gene Name	KEGG_PATHWAY
GT_EA606_A_87_P059686	1.33452	0.113607	NM_001012767	FGF8	fibroblast growth factor 8 (androgen-induced)	gga04010:MAPK signaling pathway,gga04810:Regulation of actin cytoskeleton,
GT_EA606_A_87_P017978	1.63647	0.0176427	CR353382	CXCL12	chemokine (C-X-C motif) ligand 12 (stromal cell-derived factor 1)	gga04060:Cytokine-cytokine receptor interaction,gga04672:Intestinal immune network for IgA production,
GT_EA606_A_87_P194593	1.62411	0.00115565	CR353382	CXCL12	chemokine (C-X-C motif) ligand 12 (stromal cell-derived factor 1)	gga04060:Cytokine-cytokine receptor interaction,gga04672:Intestinal immune network for IgA production,
GT_EA606_A_87_P059391	1.18592	0.00957304	NM_204749	PDGFRA	platelet-derived growth factor receptor, alpha polypeptide	gga04010:MAPK signaling pathway,gga04020:Calcium signaling pathway,gga04060:Cytokine-cytokine receptor interaction,gga04144:Endocytosis,gga04510:Focal adhesion,gga04540:Gap junction,gga04810:Regulation of actin cytoskeleton,
GT_EA606_A_87_P009421	1.11356	0.0199816	NM_205357	BMPR1A	bone morphogenetic protein receptor, type IA	gga04350:TGF-beta signaling pathway,
GT_EA606_A_87_P127228	1.73073	0.0806715	NM_001033941	FANCL	Fanconi anemia, complementation group L	gga04120:Ubiquitin mediated proteolysis,
GT_EA606_A_87_P035692	1.95038	0.0946226	NM_001031432	GNE	glucosamine (UDP-N-acetyl)-2-epimerase/N-acetylmannosamine kinase	gga00520:Amino sugar and nucleotide sugar metabolism,
GT_EA606_A_87_P106108	2.03251	0.0427352	NM_206992	POT1	similar to single-strand telomeric DNA-binding protein; cPot1; POT1 protection of telomeres 1 homolog (S. pombe)
GT_EA606_A_87_P023534	2.38444	0.170462	NM_001167758	RAD52	RAD52 homolog (S. cerevisiae)	gga03440:Homologous recombination,
GT_EA606_A_87_P009415	1.20838	0.0169819	NM_205497	EGFR	epidermal growth factor receptor (erythroblastic leukemia viral (v-erb-b) oncogene homolog, avian)	gga04010:MAPK signaling pathway,gga04012:ErbB signaling pathway,gga04020:Calcium signaling pathway,gga04060:Cytokine-cytokine receptor interaction,gga04144:Endocytosis,gga04320:Dorso-ventral axis formation,gga04510:Focal adhesion,gga04520:Adherens junctio
GT_EA606_A_87_P102646	1.11498	0.000657621	NM_205497	EGFR	epidermal growth factor receptor (erythroblastic leukemia viral (v-erb-b) oncogene homolog, avian)	gga04010:MAPK signaling pathway,gga04012:ErbB signaling pathway,gga04020:Calcium signaling pathway,gga04060:Cytokine-cytokine receptor interaction,gga04144:Endocytosis,gga04320:Dorso-ventral axis formation,gga04510:Focal adhesion,gga04520:Adherens junctio
GT_EA606_A_87_P104088	1.57774	0.0626928	ENSGALT00000024067	ROCK1	Rho-associated, coiled-coil containing protein kinase 1	gga04270:Vascular smooth muscle contraction,gga04310:Wnt signaling pathway,gga04350:TGF-beta signaling pathway,gga04510:Focal adhesion,gga04810:Regulation of actin cytoskeleton,
GT_EA606_A_87_P052861	1.6358	0.06703	NM_204714	FGF18	fibroblast growth factor 18	gga04010:MAPK signaling pathway,gga04810:Regulation of actin cytoskeleton,
GT_EA606_A_87_P009352	1.92641	0.0329693	NM_001004384	IGF1	insulin-like growth factor 1 (somatomedin C)	gga04114:Oocyte meiosis,gga04115:p53 signaling pathway,gga04150:mTOR signaling pathway,gga04510:Focal adhesion,gga04914:Progesterone-mediated oocyte maturation,
GT_EA606_A_87_P058851	2.13764	0.199854	NM_205011	HPGDS	prostaglandin-D synthase	gga00590:Arachidonic acid metabolism,
GT_EA606_A_87_P130418	1.2119	0.00770367	NM_204669	ALDH1A3	similar to aldehyde dehydrogenase-6; aldehyde dehydrogenase 1 family, member A3	gga00010:Glycolysis / Gluconeogenesis,gga00340:Histidine metabolism,gga00350:Tyrosine metabolism,gga00360:Phenylalanine metabolism,gga00980:Metabolism of xenobiotics by cytochrome P450,gga00982:Drug metabolism,
GT_EA606_A_87_P038131	1.41763	0.129683	NM_204252	FLT1	fms-related tyrosine kinase 1 (vascular endothelial growth factor/vascular permeability factor receptor)	gga04060:Cytokine-cytokine receptor interaction,gga04144:Endocytosis,gga04510:Focal adhesion,
GT_EA606_A_87_P209533	1.14212	0.221536	NM_204608	IL18	interleukin 18 (interferon-gamma-inducing factor)	gga04060:Cytokine-cytokine receptor interaction,gga04621:NOD-like receptor signaling pathway,gga04623:Cytosolic DNA-sensing pathway,
GT_EA606_A_87_P059436	2.02007	0.160705	NM_204773	SFRP2	secreted frizzled-related protein 2	gga04310:Wnt signaling pathway,
GT_EA606_A_87_P192253	2.41008	0.17417	NM_001012696	PIK3CD	phosphoinositide-3-kinase, catalytic, delta polypeptide	gga00562:Inositol phosphate metabolism,gga04012:ErbB signaling pathway,gga04070:Phosphatidylinositol signaling system,gga04150:mTOR signaling pathway,gga04210:Apoptosis,gga04370:VEGF signaling pathway,gga04510:Focal adhesion,gga04620:Toll-like receptor si
GT_EA606_A_87_P058371	1.4343	0.0147501	NM_001030693	TLR4	toll-like receptor 4	gga04620:Toll-like receptor signaling pathway,
GT_EA606_A_87_P109418	1.1795	0.0282674	NM_204859	IFNAR1	interferon (alpha, beta and omega) receptor 1	gga04060:Cytokine-cytokine receptor interaction,gga04620:Toll-like receptor signaling pathway,gga04630:Jak-STAT signaling pathway,gga04650:Natural killer cell mediated cytotoxicity,
GT_EA606_A_87_P009292	6.59352	0.0847917	NM_204605	F2	coagulation factor II (thrombin)	gga04080:Neuroactive ligand-receptor interaction,gga04810:Regulation of actin cytoskeleton,
GT_EA606_A_87_P192393	4.3964	0.179435	NM_204605	F2	coagulation factor II (thrombin)	gga04080:Neuroactive ligand-receptor interaction,gga04810:Regulation of actin cytoskeleton,
GT_EA606_A_87_P112658	1.7208	0.0296807	AB376101	TSHR	thyroid stimulating hormone receptor	gga04080:Neuroactive ligand-receptor interaction,
GT_EA606_A_87_P035099	1.17669	0.0509178	NM_001011688	TLR7	toll-like receptor 7	gga04620:Toll-like receptor signaling pathway,
GT_EA606_A_87_P053386	1.29703	0.199811	NM_205251	ITGB2	integrin, beta 2 (complement component 3 receptor 3 and 4 subunit)	gga04514:Cell adhesion molecules (CAMs),gga04650:Natural killer cell mediated cytotoxicity,gga04810:Regulation of actin cytoskeleton,
GT_EA606_A_87_P192183	1.29016	0.198163	NM_205251	ITGB2	integrin, beta 2 (complement component 3 receptor 3 and 4 subunit)	gga04514:Cell adhesion molecules (CAMs),gga04650:Natural killer cell mediated cytotoxicity,gga04810:Regulation of actin cytoskeleton,
GT_EA606_A_87_P008782	1.52826	0.065889	ENSGALT00000014678	JAG1	jagged 1 (Alagille syndrome)	gga04330:Notch signaling pathway,
GT_EA606_A_87_P036574	1.12275	0.0327269	AJ720191	TNFSF10	tumor necrosis factor (ligand) superfamily, member 10	gga04060:Cytokine-cytokine receptor interaction,gga04210:Apoptosis,gga04650:Natural killer cell mediated cytotoxicity,
GT_EA606_A_87_P226673	1.19262	0.00025767	AJ720191	TNFSF10	tumor necrosis factor (ligand) superfamily, member 10	gga04060:Cytokine-cytokine receptor interaction,gga04210:Apoptosis,gga04650:Natural killer cell mediated cytotoxicity,
GT_EA606_A_87_P018374	4.87673	0.18706	NM_001007977	ALDOB	aldolase B, fructose-bisphosphate	gga00010:Glycolysis / Gluconeogenesis,gga00030:Pentose phosphate pathway,gga00051:Fructose and mannose metabolism,
GT_EA606_A_87_P093286	2.9949	0.26104	NM_001007977	ALDOB	aldolase B, fructose-bisphosphate	gga00010:Glycolysis / Gluconeogenesis,gga00030:Pentose phosphate pathway,gga00051:Fructose and mannose metabolism,
GT_EA606_A_87_P120653	5.17497	0.164792	NM_001007977	ALDOB	aldolase B, fructose-bisphosphate	gga00010:Glycolysis / Gluconeogenesis,gga00030:Pentose phosphate pathway,gga00051:Fructose and mannose metabolism,
GT_EA606_A_87_P194478	4.61305	0.167238	NM_001007977	ALDOB	aldolase B, fructose-bisphosphate	gga00010:Glycolysis / Gluconeogenesis,gga00030:Pentose phosphate pathway,gga00051:Fructose and mannose metabolism,
GT_EA606_A_87_P008124	1.77983	0.0957641	XM_419707	FUCA2	fucosidase, alpha-L- 2, plasma	gga00511:Other glycan degradation,
GT_EA606_A_87_P009404	2.34763	0.0827148	NM_205471	PCK1	phosphoenolpyruvate carboxykinase 1 (soluble)	gga00010:Glycolysis / Gluconeogenesis,gga00020:Citrate cycle (TCA cycle),gga00620:Pyruvate metabolism,gga03320:PPAR signaling pathway,gga04910:Insulin signaling pathway,gga04920:Adipocytokine signaling pathway,
GT_EA606_A_87_P222183	3.45417	0.226824	NM_001031059	NANP	N-acetylneuraminic acid phosphatase	gga00520:Amino sugar and nucleotide sugar metabolism,
GT_EA606_A_87_P082966	4.2001	0.0164109	ENSGALT00000019704	GPD1	glycerol-3-phosphate dehydrogenase 1 (soluble)	gga00564:Glycerophospholipid metabolism,
GT_EA606_A_87_P200983	2.21723	0.0839021	ENSGALT00000019704	GPD1	glycerol-3-phosphate dehydrogenase 1 (soluble)	gga00564:Glycerophospholipid metabolism,
GT_EA606_A_87_P021630	4.03338	0.0760925	ENSGALT00000020592	FBP1	fructose-1,6-bisphosphatase 1	gga00010:Glycolysis / Gluconeogenesis,gga00030:Pentose phosphate pathway,gga00051:Fructose and mannose metabolism,gga04910:Insulin signaling pathway,
GT_EA606_A_87_P037474	3.5364	0.0959752	ENSGALT00000020592	FBP1	fructose-1,6-bisphosphatase 1	gga00010:Glycolysis / Gluconeogenesis,gga00030:Pentose phosphate pathway,gga00051:Fructose and mannose metabolism,gga04910:Insulin signaling pathway,
GT_EA606_A_87_P151193	1.27933	0.160593	ENSGALT00000009966	XYLB	xylulokinase homolog (H. influenzae)	gga00040:Pentose and glucuronate interconversions,
GT_EA606_A_87_P030709	1.31848	0.0493299	NM_001105666	CFTR	cystic fibrosis transmembrane conductance regulator (ATP-binding cassette sub-family C, member 7)	gga02010:ABC transporters,
GT_EA606_A_87_P035185	1.76755	0.108622	NM_204323	LEPR	leptin receptor	gga04060:Cytokine-cytokine receptor interaction,gga04080:Neuroactive ligand-receptor interaction,gga04630:Jak-STAT signaling pathway,gga04920:Adipocytokine signaling pathway,
GT_EA606_A_87_P032169	2.93997	0.0107276	ENSGALT00000020299	KYNU	kynureninase (L-kynurenine hydrolase)	gga00380:Tryptophan metabolism,
GT_EA606_A_87_P056936	1.61197	0.124117	NM_205493	GLUL	glutamate-ammonia ligase (glutamine synthetase)	gga00250:Alanine, aspartate and glutamate metabolism,gga00330:Arginine and proline metabolism,gga00910:Nitrogen metabolism,
GT_EA606_A_87_P021564	3.80861	0.190465	NM_001001298	PAH	phenylalanine hydroxylase	gga00360:Phenylalanine metabolism,gga00400:Phenylalanine, tyrosine and tryptophan biosynthesis,
GT_EA606_A_87_P022310	2.58112	0.0880891	ENSGALT00000010479	FAH	fumarylacetoacetate hydrolase (fumarylacetoacetase)	gga00350:Tyrosine metabolism,
GT_EA606_A_87_P107953	1.70029	0.0578477	ENSGALT00000021521	BCAT1	branched chain aminotransferase 1, cytosolic	gga00280:Valine, leucine and isoleucine degradation,gga00290:Valine, leucine and isoleucine biosynthesis,gga00770:Pantothenate and CoA biosynthesis,
GT_EA606_A_87_P130118	4.64284	0.109652	AF043543	RAB11FIP3	RAB11 family interacting protein 3 (class II)	gga04144:Endocytosis,
GT_EA606_A_87_P158808	1.5451	0.196188	XM_414301	ATP2B2	ATPase, Ca++ transporting, plasma membrane 2	gga04020:Calcium signaling pathway,
GT_EA606_A_87_P035756	1.32253	0.343815	NM_001030547	ADAL	adenosine deaminase-like; TM2 domain containing 3	gga00230:Purine metabolism,
GT_EA606_A_87_P036046	1.15184	0.0485914	NM_001030942	E2F5	E2F transcription factor 5, p130-binding	gga04110:Cell cycle,gga04350:TGF-beta signaling pathway,
GT_EA606_A_87_P036151	1.28023	0.0359648	NM_001006146	SLU7	SLU7 splicing factor homolog (S. cerevisiae)	gga03040:Spliceosome,
GT_EA606_A_87_P126993	1.28898	0.0088323	NM_001006146	SLU7	SLU7 splicing factor homolog (S. cerevisiae)	gga03040:Spliceosome,
GT_EA606_A_87_P105263	1.257	0.538604	ENSGALT00000026293	ADCY8	adenylate cyclase 8 (brain)	gga00230:Purine metabolism,gga04020:Calcium signaling pathway,gga04114:Oocyte meiosis,gga04270:Vascular smooth muscle contraction,gga04540:Gap junction,gga04912:GnRH signaling pathway,gga04914:Progesterone-mediated oocyte maturation,gga04916:Melanogenesis
GT_EA606_A_87_P017474	2.10096	0.118223	NM_001006264	PRPS2	phosphoribosyl pyrophosphate synthetase 2	gga00030:Pentose phosphate pathway,gga00230:Purine metabolism,
GT_EA606_A_87_P059471	1.14738	0.0104987	NM_204289	HSP90B1	heat shock protein 90kDa beta (Grp94), member 1	gga04621:NOD-like receptor signaling pathway,
GT_EA606_A_87_P107568	1.16901	0.0943133	NM_204289	HSP90B1	heat shock protein 90kDa beta (Grp94), member 1	gga04621:NOD-like receptor signaling pathway,
GT_EA606_A_87_P009204	1.34148	0.0910719	S43579	SRC	v-src sarcoma viral oncogene	gga04012:ErbB signaling pathway,gga04144:Endocytosis,gga04370:VEGF signaling pathway,gga04510:Focal adhesion,gga04520:Adherens junction,gga04530:Tight junction,gga04540:Gap junction,gga04912:GnRH signaling pathway,
GT_EA606_A_87_P135043	3.38643	0.0546806	ENSGALT00000015616	IRAK4	interleukin-1 receptor-associated kinase 4	gga04210:Apoptosis,gga04620:Toll-like receptor signaling pathway,
GT_EA606_A_87_P133348	1.47514	0.256227	NM_205509	FGFR3	fibroblast growth factor receptor 3	gga04010:MAPK signaling pathway,gga04144:Endocytosis,gga04810:Regulation of actin cytoskeleton,
GT_EA606_A_87_P165028	2.19121	0.157461	XM_415134	CAMKK2	calcium/calmodulin-dependent protein kinase kinase 2, beta	gga04920:Adipocytokine signaling pathway,
GT_EA606_A_87_P015853	5.01034	0.00325804	CR387384	HERC4	hect domain and RLD 4	gga04120:Ubiquitin mediated proteolysis,
GT_EA606_A_87_P109528	1.37382	0.0182605	ENSGALT00000030355	HLCS	holocarboxylase synthetase (biotin-(proprionyl-Coenzyme A-carboxylase (ATP-hydrolysing)) ligase)	gga00780:Biotin metabolism,
GT_EA606_A_87_P153208	1.13425	0.0572813	ENSGALT00000030355	HLCS	holocarboxylase synthetase (biotin-(proprionyl-Coenzyme A-carboxylase (ATP-hydrolysing)) ligase)	gga00780:Biotin metabolism,
GT_EA606_A_87_P034141	3.28962	0.279331	ENSGALT00000006829	PLG	plasminogen	gga04080:Neuroactive ligand-receptor interaction,
GT_EA606_A_87_P239148	5.19135	0.171811	XM_419618	PLG	plasminogen	gga04080:Neuroactive ligand-receptor interaction,
GT_EA606_A_87_P195668	1.5789	0.114983	ENSGALT00000013440	CTSH	cathepsin H	gga04142:Lysosome,
GT_EA606_A_87_P057121	1.34391	0.0131495	NM_001031422	PIP5K1B	phosphatidylinositol-4-phosphate 5-kinase, type I, beta	gga00562:Inositol phosphate metabolism,gga04070:Phosphatidylinositol signaling system,gga04144:Endocytosis,gga04810:Regulation of actin cytoskeleton,
GT_EA606_A_87_P059766	1.81667	0.00347619	NM_001008463	PGS1	phosphatidylglycerophosphate synthase 1	gga00564:Glycerophospholipid metabolism,
GT_EA606_A_87_P009389	1.78151	0.0380292	NM_001001901	CYP17A1	cytochrome P450, family 17, subfamily A, polypeptide 1	gga00140:Steroid hormone biosynthesis,
GT_EA606_A_87_P108593	2.68518	0.210748	NM_205118	HSD3B1	similar to 3beta-hydroxysteroid dehydrogenase/delta5-delta4 isomerase; hydroxy-delta-5-steroid dehydrogenase, 3 beta- and steroid delta-isomerase 1	gga00140:Steroid hormone biosynthesis,gga00150:Androgen and estrogen metabolism,
GT_EA606_A_87_P270288	1.14474	0.0142891	ENSGALT00000007647	PLCB2	phospholipase C, beta 2	gga00562:Inositol phosphate metabolism,gga04020:Calcium signaling pathway,gga04070:Phosphatidylinositol signaling system,gga04270:Vascular smooth muscle contraction,gga04310:Wnt signaling pathway,gga04540:Gap junction,gga04912:GnRH signaling pathway,gga04
GT_EA606_A_87_P097431	1.20587	0.0135482	NM_001199435	PLCB4	phospholipase C, beta 4	gga00562:Inositol phosphate metabolism,gga04020:Calcium signaling pathway,gga04070:Phosphatidylinositol signaling system,gga04270:Vascular smooth muscle contraction,gga04310:Wnt signaling pathway,gga04540:Gap junction,gga04912:GnRH signaling pathway,gga04
GT_EA606_A_87_P075996	3.34237	0.143596	ENSGALT00000006734	LIPC	lipase, hepatic	gga00561:Glycerolipid metabolism,
GT_EA606_A_87_P144913	1.79937	0.169074	XM_422331	TECR	glycoprotein, synaptic 2	gga01040:Biosynthesis of unsaturated fatty acids,
GT_EA606_A_87_P034601	1.94019	0.167987	ENSGALT00000024240	NPC1	Niemann-Pick disease, type C1	gga04142:Lysosome,
GT_EA606_A_87_P084146	1.92945	0.126241	NM_001012896	AP2A2	adaptor-related protein complex 2, alpha 2 subunit	gga04144:Endocytosis,
GT_EA606_A_87_P118183	1.32833	0.00803957	BX950442	RAB31	similar to RAB31, member RAS oncogene family; RAB31, member RAS oncogene family	gga04144:Endocytosis,
GT_EA606_A_87_P031472	1.50437	0.0195184	ENSGALT00000005109	RAB11FIP4	RAB11 family interacting protein 4 (class II)	gga04144:Endocytosis,
GT_EA606_A_87_P035570	2.69805	0.0351534	NM_001030792	CHMP2B	chromatin modifying protein 2B	gga04144:Endocytosis,
GT_EA606_A_87_P036207	1.48068	0.044525	NM_001030769	C3AR1	complement component 3a receptor 1	gga04080:Neuroactive ligand-receptor interaction,
GT_EA606_A_87_P106788	1.36843	0.211622	ENSGALT00000038230	APAF1	apoptotic peptidase activating factor 1	gga04115:p53 signaling pathway,gga04210:Apoptosis,
GT_EA606_A_87_P050081	1.09549	0.0204004	NM_204396	CIP1	cdk inhibitor CIP1 (p21)	gga04012:ErbB signaling pathway,gga04110:Cell cycle,gga04115:p53 signaling pathway,
GT_EA606_A_87_P111583	2.54709	0.0483819	ENSGALT00000027810	SESN3	sestrin 3	gga04115:p53 signaling pathway,
GT_EA606_A_87_P009397	6.73429	0.130842	NM_001039258	CDH1	cadherin 1, type 1, E-cadherin (epithelial)	gga04514:Cell adhesion molecules (CAMs),gga04520:Adherens junction,
GT_EA606_A_87_P050846	2.28308	0.0276794	NM_001012858	ITGA9	integrin, alpha 9	gga04510:Focal adhesion,gga04512:ECM-receptor interaction,gga04514:Cell adhesion molecules (CAMs),gga04810:Regulation of actin cytoskeleton,
GT_EA606_A_87_P054331	2.27511	0.109583	NM_001013611	CLDN1	claudin 1	gga04514:Cell adhesion molecules (CAMs),gga04530:Tight junction,
GT_EA606_A_87_P192713	2.39793	0.0881841	NM_001013611	CLDN1	claudin 1	gga04514:Cell adhesion molecules (CAMs),gga04530:Tight junction,
GT_EA606_A_87_P008851	1.85237	0.18786	NM_205334	COL14A1	similar to collagen XIV; collagen, type XIV, alpha 1 (undulin); similar to collagen, type XIV, alpha 1 (undulin)
GT_EA606_A_87_P037510	1.95928	0.110061	NM_204856	NEGR1	neuronal growth regulator 1	gga04514:Cell adhesion molecules (CAMs),
GT_EA606_A_87_P143568	1.8218	0.223952	NM_001001755	THBS2	thrombospondin 2	gga04350:TGF-beta signaling pathway,gga04510:Focal adhesion,gga04512:ECM-receptor interaction,
GT_EA606_A_87_P197453	1.19071	0.132628	NM_001242604	NCAM1	neural cell adhesion molecule 1	gga04514:Cell adhesion molecules (CAMs),
GT_EA606_A_87_P319997	1.79264	0.22953	NM_001001755	THBS2	thrombospondin 2	gga04350:TGF-beta signaling pathway,gga04510:Focal adhesion,gga04512:ECM-receptor interaction,
GT_EA606_A_87_P035119	1.683	0.0291638	ENSGALT00000041055	HTR4	5-hydroxytryptamine (serotonin) receptor 4	gga04020:Calcium signaling pathway,gga04080:Neuroactive ligand-receptor interaction,
GT_EA606_A_87_P071261	1.49069	0.356432	ENSGALT00000006969	GNA12	guanine nucleotide binding protein (G protein) alpha 12	gga04010:MAPK signaling pathway,gga04270:Vascular smooth muscle contraction,gga04810:Regulation of actin cytoskeleton,
GT_EA606_A_87_P100856	2.36582	0.00237878	ENSGALT00000008443	VIPR1	vasoactive intestinal peptide receptor 1	gga04080:Neuroactive ligand-receptor interaction,
GT_EA606_A_87_P192323	1.87453	0.0836908	NM_205079	FSHR	follicle stimulating hormone receptor	gga04080:Neuroactive ligand-receptor interaction,
GT_EA606_A_87_P061861	1.75583	0.235306	ENSGALT00000001968	SHC2	SHC (Src homology 2 domain containing) transforming protein 2	gga04012:ErbB signaling pathway,gga04510:Focal adhesion,gga04650:Natural killer cell mediated cytotoxicity,gga04910:Insulin signaling pathway,
GT_EA606_A_87_P179993	1.20668	0.0514466	ENSGALT00000008025	SHC4	SHC (Src homology 2 domain containing) family, member 4	gga04012:ErbB signaling pathway,gga04510:Focal adhesion,gga04650:Natural killer cell mediated cytotoxicity,gga04910:Insulin signaling pathway,
GT_EA606_A_87_P017426	1.14717	0.155381	ENSGALT00000014439	PDE1A	phosphodiesterase 1A, calmodulin-dependent	gga00230:Purine metabolism,
GT_EA606_A_87_P094006	1.72513	0.0599919	ENSGALT00000009404	HTR2C	5-hydroxytryptamine (serotonin) receptor 2C	gga04020:Calcium signaling pathway,gga04080:Neuroactive ligand-receptor interaction,gga04540:Gap junction,
GT_EA606_A_87_P065856	1.28207	0.00500549	NM_204439	TNFRSF1B	tumor necrosis factor receptor superfamily, member 1B	gga04060:Cytokine-cytokine receptor interaction,gga04920:Adipocytokine signaling pathway,
GT_EA606_A_87_P037934	2.38118	0.111656	NM_204338	GDF5	growth differentiation factor 5	gga04350:TGF-beta signaling pathway,
GT_EA606_A_87_P008942	1.48211	0.120211	NM_001004373	PNAT3	N-acetyltransferase 2 (arylamine N-acetyltransferase); N-acetyltransferase, pineal gland isozyme NAT-3	gga00232:Caffeine metabolism,gga00983:Drug metabolism,
GT_EA606_A_87_P008951	1.74275	0.150473	NM_205340	PNAT10	N-acetyltransferase, pineal gland isozyme NAT-10	gga00232:Caffeine metabolism,gga00983:Drug metabolism,
GT_EA606_A_87_P021762	3.14406	0.115399	BX936208	UGT1A1	UDP glucuronosyltransferase 1 family, polypeptide A1	gga00040:Pentose and glucuronate interconversions,gga00053:Ascorbate and aldarate metabolism,gga00140:Steroid hormone biosynthesis,gga00150:Androgen and estrogen metabolism,gga00500:Starch and sucrose metabolism,gga00830:Retinol metabolism,gga00860:Porphy
GT_EA606_A_87_P035955	1.1631	0.188534	NM_001039287	ACAT2	acetyl-Coenzyme A acetyltransferase 2 (acetoacetyl Coenzyme A thiolase)	gga00071:Fatty acid metabolism,gga00072:Synthesis and degradation of ketone bodies,gga00280:Valine, leucine and isoleucine degradation,gga00310:Lysine degradation,gga00380:Tryptophan metabolism,gga00620:Pyruvate metabolism,gga00640:Propanoate metabolism,g
GT_EA606_A_87_P056391	1.76304	0.0898703	NM_001031237	ACSL5	acyl-CoA synthetase long-chain family member 5	gga00071:Fatty acid metabolism,gga03320:PPAR signaling pathway,gga04920:Adipocytokine signaling pathway,
GT_EA606_A_87_P097496	1.2521	0.057686	ENSGALT00000014068	ACSS1	acyl-CoA synthetase short-chain family member 1	gga00010:Glycolysis / Gluconeogenesis,gga00620:Pyruvate metabolism,gga00640:Propanoate metabolism,
GT_EA606_A_87_P277203	1.63128	0.045223	XM_417636	DHRS3	similar to Dhrs3 protein; dehydrogenase/reductase (SDR family) member 3	gga00830:Retinol metabolism,
GT_EA606_A_87_P152673	1.3554	0.152083	XM_420039	TDH	L-threonine dehydrogenase	gga00260:Glycine, serine and threonine metabolism,
GT_EA606_A_87_P078181	1.62986	0.061456	ENSGALT00000016991	CP	ceruloplasmin (ferroxidase)	gga00860:Porphyrin and chlorophyll metabolism,
GT_EA606_A_87_P080495	3.63384	0.117673	NM_001001752	CYP2C45	cytochrome P-450 2C45; similar to cytochrome P-450	gga00590:Arachidonic acid metabolism,gga00591:Linoleic acid metabolism,gga00830:Retinol metabolism,gga00980:Metabolism of xenobiotics by cytochrome P450,gga00982:Drug metabolism,
GT_EA606_A_87_P006122	2.12912	0.0568499	ENSGALT00000016623	LOC423347	similar to acetyl-CoA synthetase 2-like	gga00010:Glycolysis / Gluconeogenesis,gga00620:Pyruvate metabolism,gga00640:Propanoate metabolism,
GT_EA606_A_87_P011391	1.44564	0.132363	NM_001130488	PPAP2B	phosphatidic acid phosphatase type 2B	gga00561:Glycerolipid metabolism,gga00564:Glycerophospholipid metabolism,gga00565:Ether lipid metabolism,gga00600:Sphingolipid metabolism,
GT_EA606_A_87_P014856	1.19994	0.0496332	ENSGALT00000023868	PIK3R1	phosphoinositide-3-kinase, regulatory subunit 1 (p85 alpha)	gga04012:ErbB signaling pathway,gga04070:Phosphatidylinositol signaling system,gga04150:mTOR signaling pathway,gga04210:Apoptosis,gga04370:VEGF signaling pathway,gga04510:Focal adhesion,gga04620:Toll-like receptor signaling pathway,gga04630:Jak-STAT signa
GT_EA606_A_87_P017044	1.66589	0.0676768	NM_001199459	RDH10	retinol dehydrogenase 10 (all-trans)	gga00830:Retinol metabolism,
GT_EA606_A_87_P019851	1.98176	0.0149048	NM_001202462	CFLAR	CASP8 and FADD-like apoptosis regulator	gga04210:Apoptosis,
GT_EA606_A_87_P021925	1.3133	0.102899	ENSGALT00000036510	LMO7	LIM domain 7	gga04520:Adherens junction,
GT_EA606_A_87_P022294	1.1261	0.23898	ENSGALT00000027426	GTF2F2	general transcription factor IIF, polypeptide 2, 30kDa	gga03022:Basal transcription factors,
GT_EA606_A_87_P022726	1.09461	0.00630811	NM_001048078	IL13RA2	interleukin 13 receptor, alpha 2	gga04630:Jak-STAT signaling pathway,
GT_EA606_A_87_P022940	1.41477	0.0764846	BX933603	LOC423347	similar to acetyl-CoA synthetase 2-like	gga00010:Glycolysis / Gluconeogenesis,gga00620:Pyruvate metabolism,gga00640:Propanoate metabolism,
GT_EA606_A_87_P023475	3.25545	0.00887573	ENSGALT00000025232	LY96	lymphocyte antigen 96	gga04620:Toll-like receptor signaling pathway,
GT_EA606_A_87_P025796	1.26359	0.07563	XM_419581	GALNT2	UDP-N-acetyl-alpha-D-galactosamine:polypeptide N-acetylgalactosaminyltransferase 2 (GalNAc-T2)	gga00512:O-Glycan biosynthesis,
GT_EA606_A_87_P031965	3.48179	0.156132	ENSGALT00000004681	HMGCS2	3-hydroxy-3-methylglutaryl-Coenzyme A synthase 2 (mitochondrial)	gga00072:Synthesis and degradation of ketone bodies,gga00280:Valine, leucine and isoleucine degradation,gga00650:Butanoate metabolism,gga00900:Terpenoid backbone biosynthesis,
GT_EA606_A_87_P035067	2.71524	0.156072	NM_001031537	AREGB	amphiregulin	gga04012:ErbB signaling pathway,
GT_EA606_A_87_P036868	1.56541	0.106371	NM_204435	ALG6	asparagine-linked glycosylation 6 homolog (S. cerevisiae, alpha-1,3-glucosyltransferase)	gga00510:N-Glycan biosynthesis,
GT_EA606_A_87_P037678	3.46768	0.235618	NM_204202	CLDN3	claudin 3	gga04514:Cell adhesion molecules (CAMs),gga04530:Tight junction,
GT_EA606_A_87_P054076	1.26026	0.216995	NM_001044656	SSX2IP	synovial sarcoma, X breakpoint 2 interacting protein	gga04520:Adherens junction,
GT_EA606_A_87_P054376	3.77823	0.140774	NM_205061	VTN	vitronectin	gga04510:Focal adhesion,gga04512:ECM-receptor interaction,
GT_EA606_A_87_P056341	3.71903	0.0156286	NM_204490	HS6ST2	heparan sulfate 6-O-sulfotransferase 2	gga00534:Heparan sulfate biosynthesis,
GT_EA606_A_87_P057426	2.78134	0.0526047	NM_204435	ALG6	asparagine-linked glycosylation 6 homolog (S. cerevisiae, alpha-1,3-glucosyltransferase)	gga00510:N-Glycan biosynthesis,
GT_EA606_A_87_P059721	1.43178	0.105013	NM_001007869	SDC4	syndecan 4	gga04512:ECM-receptor interaction,gga04514:Cell adhesion molecules (CAMs),
GT_EA606_A_87_P063161	2.75812	0.253991	ENSGALT00000004634	PSME3	proteasome (prosome, macropain) activator subunit 3 (PA28 gamma; Ki)	gga03050:Proteasome,
GT_EA606_A_87_P070611	1.69532	0.0991822	ENSGALT00000009858	TNFRSF6B	tumor necrosis factor receptor superfamily, member 6b, decoy	gga04060:Cytokine-cytokine receptor interaction,
GT_EA606_A_87_P074871	1.56465	0.175024	ENSGALT00000006611	GPT2	glutamic pyruvate transaminase (alanine aminotransferase) 2	gga00250:Alanine, aspartate and glutamate metabolism,
GT_EA606_A_87_P075461	4.52222	0.244913	ENSGALT00000001314	TAT	tyrosine aminotransferase	gga00130:Ubiquinone and other terpenoid-quinone biosynthesis,gga00270:Cysteine and methionine metabolism,gga00350:Tyrosine metabolism,gga00360:Phenylalanine metabolism,gga00400:Phenylalanine, tyrosine and tryptophan biosynthesis,
GT_EA606_A_87_P081641	1.08618	0.0372408	NM_205380	COL3A1	collagen, type III, alpha 1	gga04510:Focal adhesion,gga04512:ECM-receptor interaction,
GT_EA606_A_87_P082026	1.37306	0.0231055	ENSGALT00000013409	CFLAR	CASP8 and FADD-like apoptosis regulator	gga04210:Apoptosis,
GT_EA606_A_87_P085931	1.57669	0.282697	ENSGALT00000019300	SGPP1	sphingosine-1-phosphate phosphatase 1	gga00600:Sphingolipid metabolism,
GT_EA606_A_87_P092136	1.59458	0.019788	ENSGALT00000007194	BHMT	betaine-homocysteine methyltransferase	gga00260:Glycine, serine and threonine metabolism,gga00270:Cysteine and methionine metabolism,
GT_EA606_A_87_P099436	1.06822	0.0128502	ENSGALT00000024590	CD164	CD164 molecule, sialomucin	gga04142:Lysosome,
GT_EA606_A_87_P105053	4.52646	0.158682	ENSGALT00000025905	DPYS	dihydropyrimidinase	gga00240:Pyrimidine metabolism,gga00410:beta-Alanine metabolism,gga00770:Pantothenate and CoA biosynthesis,gga00983:Drug metabolism,
GT_EA606_A_87_P105963	1.20041	0.0539252	NM_001199313	LAMB4	laminin, beta 4	gga04510:Focal adhesion,gga04512:ECM-receptor interaction,
GT_EA606_A_87_P107603	1.23214	0.0443256	ENSGALT00000020826	GNPTAB	N-acetylglucosamine-1-phosphate transferase, alpha and beta subunits	gga04142:Lysosome,
GT_EA606_A_87_P109063	1.58744	0.271466	ENSGALT00000024862	STX19	syntaxin 19	gga04130:SNARE interactions in vesicular transport,
GT_EA606_A_87_P122368	2.51681	0.00674986	CR387171	CES1	carboxylesterase 4-like; similar to thioesterase B; hypothetical protein LOC777390; carboxylesterase 1 (monocyte/macrophage serine esterase 1)	gga00983:Drug metabolism,
GT_EA606_A_87_P123628	1.69957	0.0253266	CR389122	GALNTL1	UDP-N-acetyl-alpha-D-galactosamine:polypeptide N-acetylgalactosaminyltransferase-like 1	gga00512:O-Glycan biosynthesis,
GT_EA606_A_87_P134128	1.86011	0.0682636	ENSGALT00000007170	RFWD2	ring finger and WD repeat domain 2	gga04115:p53 signaling pathway,gga04120:Ubiquitin mediated proteolysis,
GT_EA606_A_87_P134408	2.07219	0.0346803	ENSGALT00000016623	LOC423347	similar to acetyl-CoA synthetase 2-like	gga00010:Glycolysis / Gluconeogenesis,gga00620:Pyruvate metabolism,gga00640:Propanoate metabolism,
GT_EA606_A_87_P143028	1.32164	0.0547225	NM_001044674	IL11RA	interleukin 11 receptor, alpha	gga04060:Cytokine-cytokine receptor interaction,gga04630:Jak-STAT signaling pathway,
GT_EA606_A_87_P150633	4.79117	0.123975	ENSGALT00000025905	DPYS	dihydropyrimidinase	gga00240:Pyrimidine metabolism,gga00410:beta-Alanine metabolism,gga00770:Pantothenate and CoA biosynthesis,gga00983:Drug metabolism,
GT_EA606_A_87_P151058	1.67443	0.0532756	ENSGALT00000016623	LOC423347	similar to acetyl-CoA synthetase 2-like	gga00010:Glycolysis / Gluconeogenesis,gga00620:Pyruvate metabolism,gga00640:Propanoate metabolism,
GT_EA606_A_87_P152478	1.32781	0.618648	XM_419723	IL20RA	interleukin 20 receptor, alpha	gga04060:Cytokine-cytokine receptor interaction,gga04630:Jak-STAT signaling pathway,
GT_EA606_A_87_P156893	1.32416	0.017778	NM_001202462	CFLAR	CASP8 and FADD-like apoptosis regulator	gga04210:Apoptosis,
GT_EA606_A_87_P196063	3.23813	0.179102	ENSGALT00000025905	DPYS	dihydropyrimidinase	gga00240:Pyrimidine metabolism,gga00410:beta-Alanine metabolism,gga00770:Pantothenate and CoA biosynthesis,gga00983:Drug metabolism,
GT_EA606_A_87_P211853	2.67851	0.0538532	ENSGALT00000002670	HMMR	hyaluronan-mediated motility receptor (RHAMM)	gga04512:ECM-receptor interaction,
GT_EA606_A_87_P293798	1.42661	0.15972	XM_415728	WBSCR17	Williams-Beuren syndrome chromosome region 17	gga00512:O-Glycan biosynthesis,

## Sheet: 18 down pathways
Probe Set IDs	Fold change	p-value	Accession number	Gene ID	Gene Name	KEGG_PATHWAY
GT_EA606_A_87_P114808	-1.93214	0.0435692	NM_205237	BMP4	bone morphogenetic protein 4	gga04340:Hedgehog signaling pathway,gga04350:TGF-beta signaling pathway,
GT_EA606_A_87_P037013	-1.71729	0.0793546	NM_001030727	DLD	dihydrolipoamide dehydrogenase	gga00010:Glycolysis / Gluconeogenesis,gga00020:Citrate cycle (TCA cycle),gga00260:Glycine, serine and threonine metabolism,gga00280:Valine, leucine and isoleucine degradation,gga00620:Pyruvate metabolism,
GT_EA606_A_87_P056386	-1.57193	0.0932868	NM_001030727	DLD	dihydrolipoamide dehydrogenase	gga00010:Glycolysis / Gluconeogenesis,gga00020:Citrate cycle (TCA cycle),gga00260:Glycine, serine and threonine metabolism,gga00280:Valine, leucine and isoleucine degradation,gga00620:Pyruvate metabolism,
GT_EA606_A_87_P225558	-1.50242	0.102043	ENSGALT00000039385	DLD	dihydrolipoamide dehydrogenase	gga00010:Glycolysis / Gluconeogenesis,gga00020:Citrate cycle (TCA cycle),gga00260:Glycine, serine and threonine metabolism,gga00280:Valine, leucine and isoleucine degradation,gga00620:Pyruvate metabolism,
GT_EA606_A_87_P231048	-1.71643	0.120801	NM_001030727	DLD	dihydrolipoamide dehydrogenase	gga00010:Glycolysis / Gluconeogenesis,gga00020:Citrate cycle (TCA cycle),gga00260:Glycine, serine and threonine metabolism,gga00280:Valine, leucine and isoleucine degradation,gga00620:Pyruvate metabolism,
GT_EA606_A_87_P263938	-1.70236	0.0974234	ENSGALT00000039385	DLD	dihydrolipoamide dehydrogenase	gga00010:Glycolysis / Gluconeogenesis,gga00020:Citrate cycle (TCA cycle),gga00260:Glycine, serine and threonine metabolism,gga00280:Valine, leucine and isoleucine degradation,gga00620:Pyruvate metabolism,
GT_EA606_A_87_P037178	-1.2478	0.079341	NM_001030911	PAFAH1B2	platelet-activating factor acetylhydrolase, isoform Ib, beta subunit 30kDa; similar to platelet-activating factor acetylhydrolase, isoform Ib, beta subunit 30kDa	gga00565:Ether lipid metabolism,
GT_EA606_A_87_P035335	-1.2267	0.0283785	NM_001030538	JAK2	Janus kinase 2 (a protein tyrosine kinase)	gga04630:Jak-STAT signaling pathway,gga04920:Adipocytokine signaling pathway,
GT_EA606_A_87_P100061	-1.07351	0.0883126	NM_001031089	ADI1	acireductone dioxygenase 1	gga00270:Cysteine and methionine metabolism,
GT_EA606_A_87_P051176	-2.66058	0.0644136	NM_001030619	RPS14	ribosomal protein S14	gga03010:Ribosome,
GT_EA606_A_87_P147653	-1.53907	0.152876	NM_001006217	PHKG1	phosphorylase kinase, gamma 1 (muscle)	gga04020:Calcium signaling pathway,gga04910:Insulin signaling pathway,
GT_EA606_A_87_P269373	-1.79203	0.125978	NM_001006217	PHKG1	phosphorylase kinase, gamma 1 (muscle)	gga04020:Calcium signaling pathway,gga04910:Insulin signaling pathway,
GT_EA606_A_87_P024263	-1.58446	0.0509546	NM_001079575	NTHL1	nth endonuclease III-like 1 (E. coli)	gga03410:Base excision repair,
GT_EA606_A_87_P056596	-1.63409	0.029234	NM_001079575	NTHL1	nth endonuclease III-like 1 (E. coli)	gga03410:Base excision repair,
GT_EA606_A_87_P024368	-1.67351	0.142986	NM_001007490	AIFM1	apoptosis-inducing factor, mitochondrion-associated, 1	gga04210:Apoptosis,
GT_EA606_A_87_P059466	-1.25305	0.0794708	NM_001004391	CDH4	cadherin 4, type 1, R-cadherin (retinal)	gga04514:Cell adhesion molecules (CAMs),
GT_EA606_A_87_P307628	-1.35993	0.0347702	NM_001001876	HSPG2	heparan sulfate proteoglycan 2	gga04512:ECM-receptor interaction,
GT_EA606_A_87_P325052	-2.16802	0.0608921	NM_001001876	HSPG2	heparan sulfate proteoglycan 2	gga04512:ECM-receptor interaction,
GT_EA606_A_87_P071601	-1.07009	0.136491	NM_001030638	PGP	phosphoglycolate phosphatase	gga00630:Glyoxylate and dicarboxylate metabolism,
GT_EA606_A_87_P283428	-2.0885	0.210624	NM_205476	ATP1A2	Na,K-ATPase alpha-2-subunit	gga04260:Cardiac muscle contraction,
GT_EA606_A_87_P036842	-1.87656	0.0726083	NM_001031391	ATP5B	ATP synthase, H+ transporting, mitochondrial F1 complex, beta polypeptide	gga00190:Oxidative phosphorylation,
GT_EA606_A_87_P060719	-1.98928	0.110506	NM_001031391	ATP5B	ATP synthase, H+ transporting, mitochondrial F1 complex, beta polypeptide	gga00190:Oxidative phosphorylation,
GT_EA606_A_87_P272118	-2.02834	0.101672	NM_001031391	ATP5B	ATP synthase, H+ transporting, mitochondrial F1 complex, beta polypeptide	gga00190:Oxidative phosphorylation,
GT_EA606_A_87_P011531	-1.3093	0.0747961	NM_001012916	HSPD1	similar to similar to 60 kDa heat shock protein, mitochondrial precursor (Hsp60) (60 kDa chaperonin) (CPN60) (Heat shock protein 60) (HSP-60) (Mitochondrial matrix protein P1) (HSP-65); heat shock 60kDa protein 1 (chaperonin); similar to 60 kDa heat shock	gga03018:RNA degradation,
GT_EA606_A_87_P308182	-1.4689	0.171683	NM_001012916	HSPD1	similar to similar to 60 kDa heat shock protein, mitochondrial precursor (Hsp60) (60 kDa chaperonin) (CPN60) (Heat shock protein 60) (HSP-60) (Mitochondrial matrix protein P1) (HSP-65); heat shock 60kDa protein 1 (chaperonin); similar to 60 kDa heat shock	gga03018:RNA degradation,
GT_EA606_A_87_P036472	-1.4846	0.0439662	NM_001030943	RIPK2	receptor-interacting serine-threonine kinase 2	gga04621:NOD-like receptor signaling pathway,
GT_EA606_A_87_P037851	-3.30777	0.165566	NM_204571	IL15	interleukin 15	gga04060:Cytokine-cytokine receptor interaction,gga04630:Jak-STAT signaling pathway,gga04672:Intestinal immune network for IgA production,
GT_EA606_A_87_P134613	-2.78307	0.153427	NM_204571	IL15	interleukin 15	gga04060:Cytokine-cytokine receptor interaction,gga04630:Jak-STAT signaling pathway,gga04672:Intestinal immune network for IgA production,
GT_EA606_A_87_P134618	-1.8551	0.217392	NM_204571	IL15	interleukin 15	gga04060:Cytokine-cytokine receptor interaction,gga04630:Jak-STAT signaling pathway,gga04672:Intestinal immune network for IgA production,
GT_EA606_A_87_P140148	-2.66527	0.185638	NM_204571	IL15	interleukin 15	gga04060:Cytokine-cytokine receptor interaction,gga04630:Jak-STAT signaling pathway,gga04672:Intestinal immune network for IgA production,
GT_EA606_A_87_P140473	-2.26758	0.131409	AY005476	IL15	interleukin 15	gga04060:Cytokine-cytokine receptor interaction,gga04630:Jak-STAT signaling pathway,gga04672:Intestinal immune network for IgA production,
GT_EA606_A_87_P278753	-1.12934	0.060121	NM_204954	ENTPD2	ectonucleoside triphosphate diphosphohydrolase 2	gga00230:Purine metabolism,
GT_EA606_A_87_P110528	-1.57417	0.231609	NM_204327	TNFSF13B	similar to TNF family B cell activation factor; tumor necrosis factor (ligand) superfamily, member 13b	gga04060:Cytokine-cytokine receptor interaction,gga04672:Intestinal immune network for IgA production,
GT_EA606_A_87_P035041	-1.44101	0.100935	NM_206991	ADIPOQ	adiponectin, C1Q and collagen domain containing	gga03320:PPAR signaling pathway,gga04920:Adipocytokine signaling pathway,
GT_EA606_A_87_P052591	-1.22259	0.102851	NM_204960	PTCH1	patched homolog 1 (Drosophila)	gga04340:Hedgehog signaling pathway,
GT_EA606_A_87_P009308	-2.42767	0.0316367	ENSGALT00000039313	ATP2A2	ATPase, Ca++ transporting, cardiac muscle, slow twitch 2	gga04020:Calcium signaling pathway,
GT_EA606_A_87_P069131	-2.40635	0.0400932	ENSGALT00000039313	ATP2A2	ATPase, Ca++ transporting, cardiac muscle, slow twitch 2	gga04020:Calcium signaling pathway,
GT_EA606_A_87_P069136	-2.53284	0.038584	ENSGALT00000006087	ATP2A2	ATPase, Ca++ transporting, cardiac muscle, slow twitch 2	gga04020:Calcium signaling pathway,
GT_EA606_A_87_P289378	-2.39262	0.030153	ENSGALT00000039313	ATP2A2	ATPase, Ca++ transporting, cardiac muscle, slow twitch 2	gga04020:Calcium signaling pathway,
GT_EA606_A_87_P099256	-4.39467	0.0337925	NM_205410	PLN	phospholamban	gga04020:Calcium signaling pathway,
GT_EA606_A_87_P221483	-4.15241	0.0250926	NM_205410	PLN	phospholamban	gga04020:Calcium signaling pathway,
GT_EA606_A_87_P009793	-3.58227	0.000447219	NM_001001302	MYH7	myosin, heavy chain 7, cardiac muscle, beta; similar to slow myosin heavy chain 3	gga04530:Tight junction,
GT_EA606_A_87_P053536	-3.50027	0.0247714	NM_001001302	MYH7	myosin, heavy chain 7, cardiac muscle, beta; similar to slow myosin heavy chain 3	gga04530:Tight junction,
GT_EA606_A_87_P175283	-3.78134	0.000454845	NM_001001302	MYH7	myosin, heavy chain 7, cardiac muscle, beta; similar to slow myosin heavy chain 3	gga04530:Tight junction,
GT_EA606_A_87_P306923	-2.74946	0.0197927	NM_001001302	MYH7	myosin, heavy chain 7, cardiac muscle, beta; similar to slow myosin heavy chain 3	gga04530:Tight junction,
GT_EA606_A_87_P232288	-1.84864	0.205668	NM_204223	PFKM	phosphofructokinase, muscle	gga00010:Glycolysis / Gluconeogenesis,gga00030:Pentose phosphate pathway,gga00051:Fructose and mannose metabolism,gga00052:Galactose metabolism,
GT_EA606_A_87_P015632	-1.52696	0.00863891	ENSGALT00000003144	GLUD1	glutamate dehydrogenase 1	gga00250:Alanine, aspartate and glutamate metabolism,gga00330:Arginine and proline metabolism,gga00471:D-Glutamine and D-glutamate metabolism,gga00910:Nitrogen metabolism,
GT_EA606_A_87_P058736	-1.57954	0.0237294	NM_204291	P2RX4	purinergic receptor P2X, ligand-gated ion channel, 4	gga04020:Calcium signaling pathway,gga04080:Neuroactive ligand-receptor interaction,
GT_EA606_A_87_P038135	-4.17309	0.0485323	NM_204587	MYH7B	myosin, heavy chain 7B, cardiac muscle, beta	gga04530:Tight junction,
GT_EA606_A_87_P037861	-1.82571	0.166206	NM_001030584	PFKFB4	6-phosphofructo-2-kinase/fructose-2,6-biphosphatase 4	gga00051:Fructose and mannose metabolism,
GT_EA606_A_87_P056991	-1.55068	0.127647	NM_001006395	MDH1	malate dehydrogenase 1, NAD (soluble)	gga00020:Citrate cycle (TCA cycle),gga00620:Pyruvate metabolism,gga00630:Glyoxylate and dicarboxylate metabolism,
GT_EA606_A_87_P075006	-1.68208	0.0695919	ENSGALT00000039314	GPI	glucose phosphate isomerase	gga00010:Glycolysis / Gluconeogenesis,gga00030:Pentose phosphate pathway,gga00500:Starch and sucrose metabolism,gga00520:Amino sugar and nucleotide sugar metabolism,
GT_EA606_A_87_P066251	-2.12095	0.085914	ENSGALT00000003016	MDH2	malate dehydrogenase 2, NAD (mitochondrial)	gga00020:Citrate cycle (TCA cycle),gga00620:Pyruvate metabolism,gga00630:Glyoxylate and dicarboxylate metabolism,
GT_EA606_A_87_P195538	-2.14738	0.0788642	ENSGALT00000003016	MDH2	malate dehydrogenase 2, NAD (mitochondrial)	gga00020:Citrate cycle (TCA cycle),gga00620:Pyruvate metabolism,gga00630:Glyoxylate and dicarboxylate metabolism,
GT_EA606_A_87_P036886	-1.27821	0.123825	NM_001006362	HIBADH	3-hydroxyisobutyrate dehydrogenase	gga00280:Valine, leucine and isoleucine degradation,
GT_EA606_A_87_P193213	-1.2464	0.0585479	NM_001006362	HIBADH	3-hydroxyisobutyrate dehydrogenase	gga00280:Valine, leucine and isoleucine degradation,
GT_EA606_A_87_P009785	-2.64845	0.132272	NM_205119	ENO3	enolase	gga00010:Glycolysis / Gluconeogenesis,gga03018:RNA degradation,
GT_EA606_A_87_P024675	-3.0627	0.0169518	NM_204177	LDHB	lactate dehydrogenase B	gga00010:Glycolysis / Gluconeogenesis,gga00270:Cysteine and methionine metabolism,gga00620:Pyruvate metabolism,gga00640:Propanoate metabolism,
GT_EA606_A_87_P036350	-1.91431	0.0830267	NM_001031382	OGDH	oxoglutarate (alpha-ketoglutarate) dehydrogenase (lipoamide)	gga00020:Citrate cycle (TCA cycle),gga00310:Lysine degradation,gga00380:Tryptophan metabolism,
GT_EA606_A_87_P036912	-1.58	0.0810831	NM_001031556	PGAM1	phosphoglycerate mutase 1 (brain)	gga00010:Glycolysis / Gluconeogenesis,
GT_EA606_A_87_P056916	-1.63609	0.250447	NM_205469	PKM2	pyruvate kinase, muscle	gga00010:Glycolysis / Gluconeogenesis,gga00230:Purine metabolism,gga00620:Pyruvate metabolism,
GT_EA606_A_87_P061561	-2.46398	0.127973	NM_001031382	OGDH	oxoglutarate (alpha-ketoglutarate) dehydrogenase (lipoamide)	gga00020:Citrate cycle (TCA cycle),gga00310:Lysine degradation,gga00380:Tryptophan metabolism,
GT_EA606_A_87_P116638	-1.27294	0.0792222	ENSGALT00000006719	HK1	hexokinase 1	gga00010:Glycolysis / Gluconeogenesis,gga00051:Fructose and mannose metabolism,gga00052:Galactose metabolism,gga00500:Starch and sucrose metabolism,gga00520:Amino sugar and nucleotide sugar metabolism,gga04910:Insulin signaling pathway,
GT_EA606_A_87_P140168	-1.69735	0.0115531	NM_204177	LDHB	lactate dehydrogenase B	gga00010:Glycolysis / Gluconeogenesis,gga00270:Cysteine and methionine metabolism,gga00620:Pyruvate metabolism,gga00640:Propanoate metabolism,
GT_EA606_A_87_P221738	-2.50535	0.12777	NM_205119	ENO3	enolase	gga00010:Glycolysis / Gluconeogenesis,gga03018:RNA degradation,
GT_EA606_A_87_P226158	-1.61231	0.0693423	NM_001031556	PGAM1	phosphoglycerate mutase 1 (brain)	gga00010:Glycolysis / Gluconeogenesis,
GT_EA606_A_87_P236123	-1.33817	0.216079	NM_204985	PGK1	phosphoglycerate kinase 1	gga00010:Glycolysis / Gluconeogenesis,
GT_EA606_A_87_P256153	-2.6855	0.0298817	NM_204177	LDHB	lactate dehydrogenase B	gga00010:Glycolysis / Gluconeogenesis,gga00270:Cysteine and methionine metabolism,gga00620:Pyruvate metabolism,gga00640:Propanoate metabolism,
GT_EA606_A_87_P256723	-1.33042	0.14713	NM_204985	PGK1	phosphoglycerate kinase 1	gga00010:Glycolysis / Gluconeogenesis,
GT_EA606_A_87_P318332	-2.5367	0.0295666	NM_204177	LDHB	lactate dehydrogenase B	gga00010:Glycolysis / Gluconeogenesis,gga00270:Cysteine and methionine metabolism,gga00620:Pyruvate metabolism,gga00640:Propanoate metabolism,
GT_EA606_A_87_P037565	-1.76035	0.245453	NM_001038693	PGM1	phosphoglucomutase 1	gga00010:Glycolysis / Gluconeogenesis,gga00030:Pentose phosphate pathway,gga00052:Galactose metabolism,gga00500:Starch and sucrose metabolism,gga00520:Amino sugar and nucleotide sugar metabolism,
GT_EA606_A_87_P245738	-2.01182	0.244022	NM_001038693	PGM1	phosphoglucomutase 1	gga00010:Glycolysis / Gluconeogenesis,gga00030:Pentose phosphate pathway,gga00052:Galactose metabolism,gga00500:Starch and sucrose metabolism,gga00520:Amino sugar and nucleotide sugar metabolism,
GT_EA606_A_87_P018688	-1.9635	0.0966837	NM_205321	GOT1	glutamic-oxaloacetic transaminase 1, soluble (aspartate aminotransferase 1)	gga00250:Alanine, aspartate and glutamate metabolism,gga00270:Cysteine and methionine metabolism,gga00330:Arginine and proline metabolism,gga00350:Tyrosine metabolism,gga00360:Phenylalanine metabolism,gga00400:Phenylalanine, tyrosine and tryptophan biosyn
GT_EA606_A_87_P193283	-2.16094	0.0865602	NM_205321	GOT1	glutamic-oxaloacetic transaminase 1, soluble (aspartate aminotransferase 1)	gga00250:Alanine, aspartate and glutamate metabolism,gga00270:Cysteine and methionine metabolism,gga00330:Arginine and proline metabolism,gga00350:Tyrosine metabolism,gga00360:Phenylalanine metabolism,gga00400:Phenylalanine, tyrosine and tryptophan biosyn
GT_EA606_A_87_P079216	-1.68161	0.0629695	ENSGALT00000038548	ST3GAL3	ST3 beta-galactoside alpha-2,3-sialyltransferase 3	gga00533:Keratan sulfate biosynthesis,gga00601:Glycosphingolipid biosynthesis,
GT_EA606_A_87_P022413	-1.99214	0.166882	NM_001001528	AMY1A	amylase, alpha 1A; salivary	gga00500:Starch and sucrose metabolism,
GT_EA606_A_87_P054916	-1.45476	0.123441	NM_001001528	AMY1A	amylase, alpha 1A; salivary	gga00500:Starch and sucrose metabolism,
GT_EA606_A_87_P115983	-1.60332	0.140189	BX933466	AMY1A	amylase, alpha 1A; salivary	gga00500:Starch and sucrose metabolism,
GT_EA606_A_87_P193513	-1.78533	0.0983461	NM_001001528	AMY1A	amylase, alpha 1A; salivary	gga00500:Starch and sucrose metabolism,
GT_EA606_A_87_P277478	-1.39682	0.157198	NM_001001473	AMY2A	amylase, alpha 2A; pancreatic	gga00500:Starch and sucrose metabolism,
GT_EA606_A_87_P021934	-1.32026	0.0496766	NM_001030889	FABP3	fatty acid binding protein 3, muscle and heart (mammary-derived growth inhibitor)	gga03320:PPAR signaling pathway,
GT_EA606_A_87_P064011	-1.25261	0.0118565	NM_001030889	FABP3	fatty acid binding protein 3, muscle and heart (mammary-derived growth inhibitor)	gga03320:PPAR signaling pathway,
GT_EA606_A_87_P270093	-1.40409	0.0644411	NM_001030889	FABP3	fatty acid binding protein 3, muscle and heart (mammary-derived growth inhibitor)	gga03320:PPAR signaling pathway,
GT_EA606_A_87_P054211	-1.32501	0.0217767	NM_204323	LEPR	leptin receptor	gga04060:Cytokine-cytokine receptor interaction,gga04080:Neuroactive ligand-receptor interaction,gga04630:Jak-STAT signaling pathway,gga04920:Adipocytokine signaling pathway,
GT_EA606_A_87_P035324	-2.30947	0.0899876	ENSGALT00000012830	DLAT	dihydrolipoamide S-acetyltransferase (E2 component of pyruvate dehydrogenase complex)	gga00010:Glycolysis / Gluconeogenesis,gga00020:Citrate cycle (TCA cycle),gga00620:Pyruvate metabolism,
GT_EA606_A_87_P065211	-1.57325	0.0802848	ENSGALT00000012830	DLAT	dihydrolipoamide S-acetyltransferase (E2 component of pyruvate dehydrogenase complex)	gga00010:Glycolysis / Gluconeogenesis,gga00020:Citrate cycle (TCA cycle),gga00620:Pyruvate metabolism,
GT_EA606_A_87_P254438	-1.76952	0.129024	ENSGALT00000012830	DLAT	dihydrolipoamide S-acetyltransferase (E2 component of pyruvate dehydrogenase complex)	gga00010:Glycolysis / Gluconeogenesis,gga00020:Citrate cycle (TCA cycle),gga00620:Pyruvate metabolism,
GT_EA606_A_87_P009408	-1.94846	0.110483	NM_205523	GOT2	glutamic-oxaloacetic transaminase 2, mitochondrial (aspartate aminotransferase 2)	gga00250:Alanine, aspartate and glutamate metabolism,gga00270:Cysteine and methionine metabolism,gga00330:Arginine and proline metabolism,gga00350:Tyrosine metabolism,gga00360:Phenylalanine metabolism,gga00400:Phenylalanine, tyrosine and tryptophan biosyn
GT_EA606_A_87_P050651	-1.33548	0.195655	NM_001012782	QRICH1	glutamine-rich 1	gga00970:Aminoacyl-tRNA biosynthesis,
GT_EA606_A_87_P072441	-1.13579	0.0634247	ENSGALT00000041281	HARS2	histidyl-tRNA synthetase 2, mitochondrial (putative)	gga00970:Aminoacyl-tRNA biosynthesis,
GT_EA606_A_87_P318182	-1.16021	0.060403	ENSGALT00000041281	HARS2	histidyl-tRNA synthetase 2, mitochondrial (putative)	gga00970:Aminoacyl-tRNA biosynthesis,
GT_EA606_A_87_P028276	-1.1796	0.0137828	ENSGALT00000019376	LARS2	leucyl-tRNA synthetase 2, mitochondrial	gga00290:Valine, leucine and isoleucine biosynthesis,gga00970:Aminoacyl-tRNA biosynthesis,
GT_EA606_A_87_P036313	-1.24203	0.0211491	NM_001006543	FARSB	phenylalanyl-tRNA synthetase, beta subunit	gga00970:Aminoacyl-tRNA biosynthesis,
GT_EA606_A_87_P205078	-1.52299	0.051647	ENSGALT00000021073	YARS2	tyrosyl-tRNA synthetase 2, mitochondrial	gga00970:Aminoacyl-tRNA biosynthesis,
GT_EA606_A_87_P010787	-1.49804	0.0948928	NM_001252104	ALDH4A1	aldehyde dehydrogenase 4 family, member A1	gga00250:Alanine, aspartate and glutamate metabolism,gga00330:Arginine and proline metabolism,
GT_EA606_A_87_P036312	-1.94549	0.0649314	NM_001031243	HIBCH	3-hydroxyisobutyryl-Coenzyme A hydrolase	gga00280:Valine, leucine and isoleucine degradation,gga00410:beta-Alanine metabolism,gga00640:Propanoate metabolism,
GT_EA606_A_87_P228448	-1.69829	0.0879145	NM_001031243	HIBCH	3-hydroxyisobutyryl-Coenzyme A hydrolase	gga00280:Valine, leucine and isoleucine degradation,gga00410:beta-Alanine metabolism,gga00640:Propanoate metabolism,
GT_EA606_A_87_P023576	-2.4808	0.0346017	ENSGALT00000021712	BBOX1	butyrobetaine (gamma), 2-oxoglutarate dioxygenase (gamma-butyrobetaine hydroxylase) 1	gga00310:Lysine degradation,
GT_EA606_A_87_P009006	-1.70943	0.119191	NM_205056	HADHA	hydroxyacyl-Coenzyme A dehydrogenase/3-ketoacyl-Coenzyme A thiolase/enoyl-Coenzyme A hydratase (trifunctional protein), alpha subunit	gga00062:Fatty acid elongation in mitochondria,gga00071:Fatty acid metabolism,gga00280:Valine, leucine and isoleucine degradation,gga00310:Lysine degradation,gga00380:Tryptophan metabolism,gga00410:beta-Alanine metabolism,gga00640:Propanoate metabolism,gg
GT_EA606_A_87_P055151	-2.05409	0.126701	NM_205056	HADHA	hydroxyacyl-Coenzyme A dehydrogenase/3-ketoacyl-Coenzyme A thiolase/enoyl-Coenzyme A hydratase (trifunctional protein), alpha subunit	gga00062:Fatty acid elongation in mitochondria,gga00071:Fatty acid metabolism,gga00280:Valine, leucine and isoleucine degradation,gga00310:Lysine degradation,gga00380:Tryptophan metabolism,gga00410:beta-Alanine metabolism,gga00640:Propanoate metabolism,gg
GT_EA606_A_87_P121118	-2.29107	0.0788275	NM_205056	HADHA	hydroxyacyl-Coenzyme A dehydrogenase/3-ketoacyl-Coenzyme A thiolase/enoyl-Coenzyme A hydratase (trifunctional protein), alpha subunit	gga00062:Fatty acid elongation in mitochondria,gga00071:Fatty acid metabolism,gga00280:Valine, leucine and isoleucine degradation,gga00310:Lysine degradation,gga00380:Tryptophan metabolism,gga00410:beta-Alanine metabolism,gga00640:Propanoate metabolism,gg
GT_EA606_A_87_P076946	-1.95636	0.176749	ENSGALT00000010800	EHHADH	enoyl-Coenzyme A, hydratase/3-hydroxyacyl Coenzyme A dehydrogenase	gga00071:Fatty acid metabolism,gga00280:Valine, leucine and isoleucine degradation,gga00310:Lysine degradation,gga00380:Tryptophan metabolism,gga00410:beta-Alanine metabolism,gga00640:Propanoate metabolism,gga00650:Butanoate metabolism,gga00903:Limonene a
GT_EA606_A_87_P013187	-1.44451	0.0882557	NM_001006321	SDHD	succinate dehydrogenase complex, subunit D, integral membrane protein	gga00020:Citrate cycle (TCA cycle),gga00190:Oxidative phosphorylation,
GT_EA606_A_87_P017947	-1.50331	0.111215	NM_001080875	SDHB	succinate dehydrogenase complex, subunit B, iron sulfur (Ip)	gga00020:Citrate cycle (TCA cycle),gga00190:Oxidative phosphorylation,
GT_EA606_A_87_P037907	-1.81687	0.0535751	ENSGALT00000030988	SDHA	succinate dehydrogenase complex, subunit A, flavoprotein (Fp)	gga00020:Citrate cycle (TCA cycle),gga00190:Oxidative phosphorylation,
GT_EA606_A_87_P146713	-1.69877	0.126087	NM_001080875	SDHB	succinate dehydrogenase complex, subunit B, iron sulfur (Ip)	gga00020:Citrate cycle (TCA cycle),gga00190:Oxidative phosphorylation,
GT_EA606_A_87_P016498	-1.41074	0.12044	NM_001012892	SUCLG1	succinate-CoA ligase, GDP-forming, alpha subunit	gga00020:Citrate cycle (TCA cycle),gga00640:Propanoate metabolism,
GT_EA606_A_87_P035518	-2.2944	0.112986	NM_001012901	DLST	dihydrolipoamide S-succinyltransferase (E2 component of 2-oxo-glutarate complex)	gga00020:Citrate cycle (TCA cycle),gga00310:Lysine degradation,
GT_EA606_A_87_P037203	-1.80558	0.0871725	NM_204188	ACO2	aconitase 2, mitochondrial	gga00020:Citrate cycle (TCA cycle),gga00630:Glyoxylate and dicarboxylate metabolism,
GT_EA606_A_87_P058301	-1.75121	0.136905	NM_001012892	SUCLG1	succinate-CoA ligase, GDP-forming, alpha subunit	gga00020:Citrate cycle (TCA cycle),gga00640:Propanoate metabolism,
GT_EA606_A_87_P075851	-1.54267	0.0955079	NM_001005808	IDH3A	isocitrate dehydrogenase 3 (NAD+) alpha	gga00020:Citrate cycle (TCA cycle),
GT_EA606_A_87_P085311	-1.90168	0.124575	NM_001012901	DLST	dihydrolipoamide S-succinyltransferase (E2 component of 2-oxo-glutarate complex)	gga00020:Citrate cycle (TCA cycle),gga00310:Lysine degradation,
GT_EA606_A_87_P116228	-1.12635	0.133309	NM_001012901	DLST	dihydrolipoamide S-succinyltransferase (E2 component of 2-oxo-glutarate complex)	gga00020:Citrate cycle (TCA cycle),gga00310:Lysine degradation,
GT_EA606_A_87_P116863	-1.70276	0.0262557	NM_001012901	DLST	dihydrolipoamide S-succinyltransferase (E2 component of 2-oxo-glutarate complex)	gga00020:Citrate cycle (TCA cycle),gga00310:Lysine degradation,
GT_EA606_A_87_P205933	-1.48752	0.131606	NM_001012901	DLST	dihydrolipoamide S-succinyltransferase (E2 component of 2-oxo-glutarate complex)	gga00020:Citrate cycle (TCA cycle),gga00310:Lysine degradation,
GT_EA606_A_87_P217408	-2.84872	0.0495947	NM_001031387	IDH3B	isocitrate dehydrogenase 3 (NAD+) beta	gga00020:Citrate cycle (TCA cycle),
GT_EA606_A_87_P294093	-1.96933	0.106972	NM_204188	ACO2	aconitase 2, mitochondrial	gga00020:Citrate cycle (TCA cycle),gga00630:Glyoxylate and dicarboxylate metabolism,
GT_EA606_A_87_P296223	-1.8113	0.118982	NM_001012892	SUCLG1	succinate-CoA ligase, GDP-forming, alpha subunit	gga00020:Citrate cycle (TCA cycle),gga00640:Propanoate metabolism,
GT_EA606_A_87_P300158	-2.15096	0.115375	NM_001012892	SUCLG1	succinate-CoA ligase, GDP-forming, alpha subunit	gga00020:Citrate cycle (TCA cycle),gga00640:Propanoate metabolism,
GT_EA606_A_87_P050206	-1.56548	0.090049	NM_001006502	NDUFB8	NADH dehydrogenase (ubiquinone) 1 beta subcomplex, 8, 19kDa	gga00190:Oxidative phosphorylation,
GT_EA606_A_87_P055146	-1.5105	0.0549693	NM_204286	ATP5A1	ATP synthase, H+ transporting, mitochondrial F1 complex, alpha subunit 1, cardiac muscle; similar to mitochondrial ATP synthase alpha subunit	gga00190:Oxidative phosphorylation,
GT_EA606_A_87_P060546	-2.22234	0.0810968	ENSGALT00000036313	ATP5A1W	ATP synthase subunit alpha	gga00190:Oxidative phosphorylation,
GT_EA606_A_87_P060551	-2.372	0.17217	ENSGALT00000036312	ATP5A1W	ATP synthase subunit alpha	gga00190:Oxidative phosphorylation,
GT_EA606_A_87_P060556	-2.5572	0.1346	NM_204286	ATP5A1	ATP synthase, H+ transporting, mitochondrial F1 complex, alpha subunit 1, cardiac muscle; similar to mitochondrial ATP synthase alpha subunit	gga00190:Oxidative phosphorylation,
GT_EA606_A_87_P091476	-1.26175	0.0615088	NM_204286	ATP5A1	ATP synthase, H+ transporting, mitochondrial F1 complex, alpha subunit 1, cardiac muscle; similar to mitochondrial ATP synthase alpha subunit	gga00190:Oxidative phosphorylation,
GT_EA606_A_87_P091481	-2.18625	0.109884	NM_204286	ATP5A1	ATP synthase, H+ transporting, mitochondrial F1 complex, alpha subunit 1, cardiac muscle; similar to mitochondrial ATP synthase alpha subunit	gga00190:Oxidative phosphorylation,
GT_EA606_A_87_P091486	-2.02291	0.0951193	NM_204286	ATP5A1	ATP synthase, H+ transporting, mitochondrial F1 complex, alpha subunit 1, cardiac muscle; similar to mitochondrial ATP synthase alpha subunit	gga00190:Oxidative phosphorylation,
GT_EA606_A_87_P091491	-2.15712	0.0879673	NM_204286	ATP5A1	ATP synthase, H+ transporting, mitochondrial F1 complex, alpha subunit 1, cardiac muscle; similar to mitochondrial ATP synthase alpha subunit	gga00190:Oxidative phosphorylation,
GT_EA606_A_87_P114613	-1.45195	0.0909037	BX931795	ATP5G1	ATP synthase, H+ transporting, mitochondrial F0 complex, subunit C1 (subunit 9)	gga00190:Oxidative phosphorylation,
GT_EA606_A_87_P198694	-1.88382	0.106992	ENSGALT00000002026	ATP5G1	ATP synthase, H+ transporting, mitochondrial F0 complex, subunit C1 (subunit 9)	gga00190:Oxidative phosphorylation,
GT_EA606_A_87_P296643	-1.16238	0.0897451	NM_001252611	ATP6AP1	ATPase, H+ transporting, lysosomal accessory protein 1	gga00190:Oxidative phosphorylation,gga04142:Lysosome,
GT_EA606_A_87_P307213	-1.50935	0.0918575	NM_204974	ATP6V1A	ATPase, H+ transporting, lysosomal 70kDa, V1 subunit A; similar to A2 isoform of vacuolar H+-ATPase subunit A	gga00190:Oxidative phosphorylation,
GT_EA606_A_87_P055106	-1.80449	0.181765	NM_001006518	NDUFS1	NADH dehydrogenase (ubiquinone) Fe-S protein 1, 75kDa (NADH-coenzyme Q reductase)	gga00190:Oxidative phosphorylation,
GT_EA606_A_87_P278343	-1.71517	0.113169	NM_001006518	NDUFS1	NADH dehydrogenase (ubiquinone) Fe-S protein 1, 75kDa (NADH-coenzyme Q reductase)	gga00190:Oxidative phosphorylation,
GT_EA606_A_87_P280008	-1.92841	0.107124	NM_001006518	NDUFS1	NADH dehydrogenase (ubiquinone) Fe-S protein 1, 75kDa (NADH-coenzyme Q reductase)	gga00190:Oxidative phosphorylation,
GT_EA606_A_87_P059841	-1.51351	0.0435347	ENSGALT00000035261	ND4L	NADH-ubiquinone oxidoreductase chain 4L	gga00190:Oxidative phosphorylation,
GT_EA606_A_87_P059846	-1.264	0.107699	ENSGALT00000029081	ND5	NADH-ubiquinone oxidoreductase chain 5	gga00190:Oxidative phosphorylation,
GT_EA606_A_87_P008373	-1.36422	0.135361	ENSGALT00000029080	CYTB	Cytochrome b	gga00190:Oxidative phosphorylation,gga04260:Cardiac muscle contraction,
GT_EA606_A_87_P010248	-1.59383	0.0382815	ENSGALT00000037844	CYCS	cytochrome c, somatic	gga04115:p53 signaling pathway,gga04210:Apoptosis,
GT_EA606_A_87_P055101	-1.78466	0.0644889	NM_001079478	CYCS	cytochrome c, somatic	gga04115:p53 signaling pathway,gga04210:Apoptosis,
GT_EA606_A_87_P292708	-1.19362	0.132425	ENSGALT00000029086	ND3	NADH-ubiquinone oxidoreductase chain 3	gga00190:Oxidative phosphorylation,
GT_EA606_A_87_P074076	-1.4477	0.0699912	NM_001030601	IMPDH2	IMP (inosine monophosphate) dehydrogenase 2	gga00230:Purine metabolism,gga00983:Drug metabolism,
GT_EA606_A_87_P209018	-1.15783	0.013558	NM_001030601	IMPDH2	IMP (inosine monophosphate) dehydrogenase 2	gga00230:Purine metabolism,gga00983:Drug metabolism,
GT_EA606_A_87_P224338	-3.10095	0.0979208	NM_205519	ATP2A1	ATPase, Ca++ transporting, cardiac muscle, fast twitch 1	gga04020:Calcium signaling pathway,
GT_EA606_A_87_P245263	-2.15517	0.11624	NM_205519	ATP2A1	ATPase, Ca++ transporting, cardiac muscle, fast twitch 1	gga04020:Calcium signaling pathway,
GT_EA606_A_87_P009326	-1.85916	0.0571011	NM_205475	ATP1A3	ATPase, Na+/K+ transporting, alpha 3 polypeptide	gga04260:Cardiac muscle contraction,
GT_EA606_A_87_P236298	-1.86669	0.202449	NM_205109	AK1	AK	gga00230:Purine metabolism,
GT_EA606_A_87_P114973	-1.90734	0.156879	NM_001006456	RFC1	similar to replication factor C (activator 1) 1, 145kDa; replication factor C (activator 1) 1, 145kDa; similar to replication factor C large subunit	gga03030:DNA replication,gga03420:Nucleotide excision repair,gga03430:Mismatch repair,
GT_EA606_A_87_P051536	-1.29591	0.0155638	NM_001030894	TAF12	TAF12 RNA polymerase II, TATA box binding protein (TBP)-associated factor, 20kDa	gga03022:Basal transcription factors,
GT_EA606_A_87_P058591	-1.3507	0.0559661	NM_205313	THRA	thyroid hormone receptor, alpha (erythroblastic leukemia viral (v-erb-a) oncogene homolog, avian)	gga04080:Neuroactive ligand-receptor interaction,
GT_EA606_A_87_P114698	-1.45129	0.212678	NM_001001464	PPARA	peroxisome proliferator-activated receptor alpha	gga03320:PPAR signaling pathway,gga04920:Adipocytokine signaling pathway,
GT_EA606_A_87_P017740	-3.64851	0.210327	CR353746	NDUFB1	NADH dehydrogenase (ubiquinone) 1 beta subcomplex, 1, 7kDa; ataxin 3	gga00190:Oxidative phosphorylation,
GT_EA606_A_87_P127923	-3.83567	0.0254101	CR523566	EFTUD2	elongation factor Tu GTP binding domain containing 2	gga03040:Spliceosome,
GT_EA606_A_87_P167033	-1.19355	0.0160631	ENSGALT00000025528	NT5E	5'-nucleotidase, ecto (CD73)	gga00230:Purine metabolism,gga00240:Pyrimidine metabolism,gga00760:Nicotinate and nicotinamide metabolism,
GT_EA606_A_87_P157438	-1.72278	0.245964	ENSGALT00000025855	RRM2B	ribonucleotide reductase M2 B (TP53 inducible)	gga00230:Purine metabolism,gga00240:Pyrimidine metabolism,gga00480:Glutathione metabolism,gga04115:p53 signaling pathway,
GT_EA606_A_87_P226148	-1.92139	0.218271	ENSGALT00000006051	NT5C1A	5'-nucleotidase, cytosolic IA	gga00230:Purine metabolism,gga00240:Pyrimidine metabolism,gga00760:Nicotinate and nicotinamide metabolism,
GT_EA606_A_87_P023134	-1.24664	0.042914	ENSGALT00000005690	AK2	adenylate kinase 2	gga00230:Purine metabolism,
GT_EA606_A_87_P055141	-1.49422	0.0935819	NM_001031247	NDUFA10	NADH dehydrogenase (ubiquinone) 1 alpha subcomplex, 10, 42kDa	gga00190:Oxidative phosphorylation,
GT_EA606_A_87_P192238	-1.72773	0.0715155	NM_001031247	NDUFA10	NADH dehydrogenase (ubiquinone) 1 alpha subcomplex, 10, 42kDa	gga00190:Oxidative phosphorylation,
GT_EA606_A_87_P024768	-5.36587	0.0353039	BX929329	RPL3L	ribosomal protein L3-like	gga03010:Ribosome,
GT_EA606_A_87_P071536	-4.96988	0.0391904	ENSGALT00000008758	RPL3L	ribosomal protein L3-like	gga03010:Ribosome,
GT_EA606_A_87_P165273	-1.55926	0.0990585	XM_001235170	MKNK1	MAP kinase interacting serine/threonine kinase 1	gga04010:MAPK signaling pathway,gga04910:Insulin signaling pathway,
GT_EA606_A_87_P317412	-2.13275	0.0322623	XM_001235170	MKNK1	MAP kinase interacting serine/threonine kinase 1	gga04010:MAPK signaling pathway,gga04910:Insulin signaling pathway,
GT_EA606_A_87_P232563	-1.55168	0.0157975	NM_204934	GSN	gelsolin	gga04810:Regulation of actin cytoskeleton,
GT_EA606_A_87_P001674	-1.50805	0.00401481	ENSGALT00000021309	TUBA4A	tubulin, alpha 4a	gga04540:Gap junction,
GT_EA606_A_87_P107858	-1.22997	0.0960975	NM_205444	TUBA8	tubulin, alpha 8	gga04540:Gap junction,
GT_EA606_A_87_P107865	-1.559	0.0517046	ENSGALT00000037480	TUBA4A	tubulin, alpha 4a	gga04540:Gap junction,
GT_EA606_A_87_P107868	-1.89976	0.0431911	ENSGALT00000037478	TUBA4A	tubulin, alpha 4a	gga04540:Gap junction,
GT_EA606_A_87_P271453	-1.19626	0.00771807	NM_001109771	RPS6KA1	ribosomal protein S6 kinase, 90kDa, polypeptide 1	gga04010:MAPK signaling pathway,gga04114:Oocyte meiosis,gga04150:mTOR signaling pathway,gga04914:Progesterone-mediated oocyte maturation,
GT_EA606_A_87_P006638	-2.15016	0.0548072	XM_419725	MAP3K5	mitogen-activated protein kinase kinase kinase 5	gga04010:MAPK signaling pathway,
GT_EA606_A_87_P026945	-1.56172	0.104522	ENSGALT00000018893	MAP3K4	mitogen-activated protein kinase kinase kinase 4	gga04010:MAPK signaling pathway,gga04912:GnRH signaling pathway,
GT_EA606_A_87_P029741	-1.64788	0.0521658	ENSGALT00000018893	MAP3K4	mitogen-activated protein kinase kinase kinase 4	gga04010:MAPK signaling pathway,gga04912:GnRH signaling pathway,
GT_EA606_A_87_P222658	-1.50161	0.051116	ENSGALT00000018893	MAP3K4	mitogen-activated protein kinase kinase kinase 4	gga04010:MAPK signaling pathway,gga04912:GnRH signaling pathway,
GT_EA606_A_87_P286458	-1.48319	0.141259	ENSGALT00000001199	LOC428278	hypothetical LOC428278	gga04020:Calcium signaling pathway,gga04270:Vascular smooth muscle contraction,gga04510:Focal adhesion,gga04810:Regulation of actin cytoskeleton,
GT_EA606_A_87_P054086	-1.11077	0.0336878	NM_001085359	DUSP1	dual specificity phosphatase 1	gga04010:MAPK signaling pathway,
GT_EA606_A_87_P108549	-2.4475	0.0585717	NM_205385	PRSS3	protease, serine, 3; similar to trypsinogen	gga04080:Neuroactive ligand-receptor interaction,
GT_EA606_A_87_P129598	-1.17868	0.0154514	NM_205303	CAPN1	calpain 1, (mu/I) large subunit	gga04210:Apoptosis,
GT_EA606_A_87_P242463	-1.13822	0.0691198	NM_001039277	SRPR	signal recognition particle receptor ('docking protein')	gga03060:Protein export,
GT_EA606_A_87_P300183	-1.38164	0.113951	NM_001039277	SRPR	signal recognition particle receptor ('docking protein')	gga03060:Protein export,
GT_EA606_A_87_P035705	-1.49726	0.030329	NM_001031477	YWHAG	tyrosine 3-monooxygenase/tryptophan 5-monooxygenase activation protein, gamma polypeptide	gga04110:Cell cycle,gga04114:Oocyte meiosis,
GT_EA606_A_87_P066241	-1.90281	0.012813	NM_001031477	YWHAG	tyrosine 3-monooxygenase/tryptophan 5-monooxygenase activation protein, gamma polypeptide	gga04110:Cell cycle,gga04114:Oocyte meiosis,
GT_EA606_A_87_P119573	-1.26559	0.00750531	NM_001031477	YWHAG	tyrosine 3-monooxygenase/tryptophan 5-monooxygenase activation protein, gamma polypeptide	gga04110:Cell cycle,gga04114:Oocyte meiosis,
GT_EA606_A_87_P210453	-1.24464	0.0014345	NM_001031477	YWHAG	tyrosine 3-monooxygenase/tryptophan 5-monooxygenase activation protein, gamma polypeptide	gga04110:Cell cycle,gga04114:Oocyte meiosis,
GT_EA606_A_87_P223038	-1.58183	0.0180747	NM_001031477	YWHAG	tyrosine 3-monooxygenase/tryptophan 5-monooxygenase activation protein, gamma polypeptide	gga04110:Cell cycle,gga04114:Oocyte meiosis,
GT_EA606_A_87_P253983	-1.39867	0.193004	ENSGALT00000002452	PIP4K2B	phosphatidylinositol-5-phosphate 4-kinase, type II, beta	gga00562:Inositol phosphate metabolism,gga04070:Phosphatidylinositol signaling system,gga04144:Endocytosis,gga04810:Regulation of actin cytoskeleton,
GT_EA606_A_87_P107688	-1.30219	0.27768	ENSGALT00000037586	AGK	acylglycerol kinase	gga00561:Glycerolipid metabolism,
GT_EA606_A_87_P256358	-1.18416	0.227229	ENSGALT00000020996	AGK	acylglycerol kinase	gga00561:Glycerolipid metabolism,
GT_EA606_A_87_P030244	-1.34463	0.314511	XM_425261	PLCB1	phospholipase C, beta 1 (phosphoinositide-specific)	gga00562:Inositol phosphate metabolism,gga04020:Calcium signaling pathway,gga04070:Phosphatidylinositol signaling system,gga04270:Vascular smooth muscle contraction,gga04310:Wnt signaling pathway,gga04540:Gap junction,gga04912:GnRH signaling pathway,gga04
GT_EA606_A_87_P036729	-1.23198	0.00245133	NM_001039294	FDFT1	farnesyl-diphosphate farnesyltransferase 1	gga00100:Steroid biosynthesis,
GT_EA606_A_87_P009096	-2.21158	0.0148654	NM_204969	PLA2G7	phospholipase A2, group VII (platelet-activating factor acetylhydrolase, plasma)	gga00565:Ether lipid metabolism,
GT_EA606_A_87_P021372	-2.91126	0.012842	NM_001130738	PLA2G6	phospholipase A2, group VI (cytosolic, calcium-independent)	gga00564:Glycerophospholipid metabolism,gga00565:Ether lipid metabolism,gga00590:Arachidonic acid metabolism,gga00591:Linoleic acid metabolism,gga00592:alpha-Linolenic acid metabolism,gga04010:MAPK signaling pathway,gga04270:Vascular smooth muscle contrac
GT_EA606_A_87_P057096	-1.2567	0.0878294	NM_001130740	PNPLA4	patatin-like phospholipase domain containing 4; similar to Patatin-like phospholipase domain containing 4	gga00830:Retinol metabolism,
GT_EA606_A_87_P057126	-1.71498	0.00501909	NM_204969	PLA2G7	phospholipase A2, group VII (platelet-activating factor acetylhydrolase, plasma)	gga00565:Ether lipid metabolism,
GT_EA606_A_87_P310407	-1.53206	0.126126	NM_001130740	PNPLA4	patatin-like phospholipase domain containing 4; similar to Patatin-like phospholipase domain containing 4	gga00830:Retinol metabolism,
GT_EA606_A_87_P007929	-1.35792	0.0735356	ENSGALT00000016576	COQ6	coenzyme Q6 homolog, monooxygenase (S. cerevisiae)	gga00130:Ubiquinone and other terpenoid-quinone biosynthesis,
GT_EA606_A_87_P022038	-1.24511	0.0527067	NM_001006194	COQ5	coenzyme Q5 homolog, methyltransferase (S. cerevisiae)	gga00130:Ubiquinone and other terpenoid-quinone biosynthesis,
GT_EA606_A_87_P133788	-1.2941	0.17554	NM_001006194	COQ5	coenzyme Q5 homolog, methyltransferase (S. cerevisiae)	gga00130:Ubiquinone and other terpenoid-quinone biosynthesis,
GT_EA606_A_87_P193663	-1.44787	0.146539	NM_001006194	COQ5	coenzyme Q5 homolog, methyltransferase (S. cerevisiae)	gga00130:Ubiquinone and other terpenoid-quinone biosynthesis,
GT_EA606_A_87_P219748	-1.72012	0.122816	ENSGALT00000016576	COQ6	coenzyme Q6 homolog, monooxygenase (S. cerevisiae)	gga00130:Ubiquinone and other terpenoid-quinone biosynthesis,
GT_EA606_A_87_P199378	-6.6593	0.000830145	NM_001006471	TOLLIP	toll interacting protein	gga04620:Toll-like receptor signaling pathway,
GT_EA606_A_87_P084326	-3.12368	0.102923	ENSGALT00000012126	P2RX3	purinergic receptor P2X, ligand-gated ion channel, 3	gga04020:Calcium signaling pathway,gga04080:Neuroactive ligand-receptor interaction,
GT_EA606_A_87_P036354	-1.40486	0.191602	NM_001030917	AP4B1	adaptor-related protein complex 4, beta 1 subunit	gga04142:Lysosome,
GT_EA606_A_87_P008923	-2.06376	0.0426555	NM_205256	TFRC	transferrin receptor (p90, CD71)	gga04144:Endocytosis,
GT_EA606_A_87_P009669	-1.62516	0.177392	NM_001039602	SLC27A1	solute carrier family 27 (fatty acid transporter), member 1	gga03320:PPAR signaling pathway,
GT_EA606_A_87_P088611	-2.56697	0.173056	NM_001039602	SLC27A1	solute carrier family 27 (fatty acid transporter), member 1	gga03320:PPAR signaling pathway,
GT_EA606_A_87_P037123	-2.03818	0.0309131	NM_001006443	SLC25A4	solute carrier family 25 (mitochondrial carrier; adenine nucleotide translocator), member 4	gga04020:Calcium signaling pathway,
GT_EA606_A_87_P082681	-1.14744	0.139733	ENSGALT00000038272	ABCB6	ATP-binding cassette, sub-family B (MDR/TAP), member 6	gga02010:ABC transporters,
GT_EA606_A_87_P122983	-1.39576	0.0826246	CR388445	ABCB6	ATP-binding cassette, sub-family B (MDR/TAP), member 6	gga02010:ABC transporters,
GT_EA606_A_87_P169878	-2.16923	0.0451802	NM_001006443	SLC25A4	solute carrier family 25 (mitochondrial carrier; adenine nucleotide translocator), member 4	gga04020:Calcium signaling pathway,
GT_EA606_A_87_P193403	-2.93006	0.0433025	NM_001006443	SLC25A4	solute carrier family 25 (mitochondrial carrier; adenine nucleotide translocator), member 4	gga04020:Calcium signaling pathway,
GT_EA606_A_87_P308082	-2.5099	0.209385	NM_001128101	SLC11A2	solute carrier family 11 (proton-coupled divalent metal ion transporters), member 2	gga04142:Lysosome,
GT_EA606_A_87_P036920	-1.84343	0.346006	NM_001031547	APIP	APAF1 interacting protein	gga00270:Cysteine and methionine metabolism,
GT_EA606_A_87_P009211	-2.51823	0.0360579	NM_204321	CRHR1	corticotropin releasing hormone receptor 1	gga04080:Neuroactive ligand-receptor interaction,
GT_EA606_A_87_P057876	-1.15499	0.00341847	NM_204523	TLN1	talin 1	gga04510:Focal adhesion,
GT_EA606_A_87_P267918	-1.29748	0.0951847	NM_204483	ITGB5	integrin, beta 5	gga04510:Focal adhesion,gga04512:ECM-receptor interaction,gga04810:Regulation of actin cytoskeleton,
GT_EA606_A_87_P037238	-1.54539	0.0382005	NM_204454	CRHR2	corticotropin releasing hormone receptor 2	gga04080:Neuroactive ligand-receptor interaction,
GT_EA606_A_87_P009105	-3.47674	0.000653027	U30609	MTNR1B	melatonin receptor 1B	gga04080:Neuroactive ligand-receptor interaction,
GT_EA606_A_87_P111693	-3.18641	0.00340143	ENSGALT00000027844	MTNR1B	melatonin receptor 1B	gga04080:Neuroactive ligand-receptor interaction,
GT_EA606_A_87_P082266	-1.75864	0.247343	ENSGALT00000014999	PDE11A	phosphodiesterase 11A	gga00230:Purine metabolism,
GT_EA606_A_87_P107923	-1.79864	0.0343025	ENSGALT00000037438	PDE3A	phosphodiesterase 3A, cGMP-inhibited	gga00230:Purine metabolism,
GT_EA606_A_87_P038055	-1.53239	0.00698464	NM_205531	WNT8A	wingless-type MMTV integration site family, member 8A	gga04310:Wnt signaling pathway,gga04340:Hedgehog signaling pathway,gga04916:Melanogenesis,
GT_EA606_A_87_P024090	-1.05845	0.269563	NM_001198715	HMGCL	3-hydroxymethyl-3-methylglutaryl-Coenzyme A lyase	gga00072:Synthesis and degradation of ketone bodies,gga00280:Valine, leucine and isoleucine degradation,gga00650:Butanoate metabolism,
GT_EA606_A_87_P024251	-1.82416	0.193036	ENSGALT00000027718	ACAT1	acetyl-Coenzyme A acetyltransferase 1 (acetoacetyl Coenzyme A thiolase)	gga00071:Fatty acid metabolism,gga00072:Synthesis and degradation of ketone bodies,gga00280:Valine, leucine and isoleucine degradation,gga00310:Lysine degradation,gga00380:Tryptophan metabolism,gga00620:Pyruvate metabolism,gga00640:Propanoate metabolism,g
GT_EA606_A_87_P056446	-2.1164	0.0225946	NM_001012578	ACSL1	acyl-CoA synthetase long-chain family member 1	gga00071:Fatty acid metabolism,gga03320:PPAR signaling pathway,gga04920:Adipocytokine signaling pathway,
GT_EA606_A_87_P058856	-1.92718	0.130427	NM_001033645	EPHX2	epoxide hydrolase 2, cytoplasmic	gga00590:Arachidonic acid metabolism,
GT_EA606_A_87_P198933	-1.98429	0.162602	ENSGALT00000027718	ACAT1	acetyl-Coenzyme A acetyltransferase 1 (acetoacetyl Coenzyme A thiolase)	gga00071:Fatty acid metabolism,gga00072:Synthesis and degradation of ketone bodies,gga00280:Valine, leucine and isoleucine degradation,gga00310:Lysine degradation,gga00380:Tryptophan metabolism,gga00620:Pyruvate metabolism,gga00640:Propanoate metabolism,g
GT_EA606_A_87_P216143	-1.27901	0.258739	NM_001198715	HMGCL	3-hydroxymethyl-3-methylglutaryl-Coenzyme A lyase	gga00072:Synthesis and degradation of ketone bodies,gga00280:Valine, leucine and isoleucine degradation,gga00650:Butanoate metabolism,
GT_EA606_A_87_P241023	-1.30516	0.205022	NM_001197288	ACAA1	acetyl-Coenzyme A acyltransferase 1 (peroxisomal 3-oxoacyl-Coenzyme A thiolase)	gga00071:Fatty acid metabolism,gga00280:Valine, leucine and isoleucine degradation,gga01040:Biosynthesis of unsaturated fatty acids,gga03320:PPAR signaling pathway,
GT_EA606_A_87_P265028	-1.53874	0.134815	NM_001033645	EPHX2	epoxide hydrolase 2, cytoplasmic	gga00590:Arachidonic acid metabolism,
GT_EA606_A_87_P287398	-1.83632	0.161818	ENSGALT00000027718	ACAT1	acetyl-Coenzyme A acetyltransferase 1 (acetoacetyl Coenzyme A thiolase)	gga00071:Fatty acid metabolism,gga00072:Synthesis and degradation of ketone bodies,gga00280:Valine, leucine and isoleucine degradation,gga00310:Lysine degradation,gga00380:Tryptophan metabolism,gga00620:Pyruvate metabolism,gga00640:Propanoate metabolism,g
GT_EA606_A_87_P321682	-1.19303	0.258127	NM_001198716	HMGCL	3-hydroxymethyl-3-methylglutaryl-Coenzyme A lyase	gga00072:Synthesis and degradation of ketone bodies,gga00280:Valine, leucine and isoleucine degradation,gga00650:Butanoate metabolism,
GT_EA606_A_87_P091846	-1.2748	0.184515	NM_001006578	OXCT1	3-oxoacid CoA transferase 1	gga00072:Synthesis and degradation of ketone bodies,gga00280:Valine, leucine and isoleucine degradation,gga00650:Butanoate metabolism,
GT_EA606_A_87_P209653	-1.30177	0.0389304	NM_001006578	OXCT1	3-oxoacid CoA transferase 1	gga00072:Synthesis and degradation of ketone bodies,gga00280:Valine, leucine and isoleucine degradation,gga00650:Butanoate metabolism,
GT_EA606_A_87_P098551	-1.50007	0.0215232	ENSGALT00000018198	GNPAT	glyceronephosphate O-acyltransferase	gga00564:Glycerophospholipid metabolism,
GT_EA606_A_87_P245543	-1.24788	0.290532	NM_001122777	TXNRD3	thioredoxin reductase 3	gga00240:Pyrimidine metabolism,
GT_EA606_A_87_P036027	-1.6051	0.0709155	NM_001006281	NDUFA9	NADH dehydrogenase (ubiquinone) 1 alpha subcomplex, 9, 39kDa	gga00190:Oxidative phosphorylation,
GT_EA606_A_87_P191273	-1.52479	0.120165	NM_001006281	NDUFA9	NADH dehydrogenase (ubiquinone) 1 alpha subcomplex, 9, 39kDa	gga00190:Oxidative phosphorylation,
GT_EA606_A_87_P247878	-1.7231	0.067785	NM_001006281	NDUFA9	NADH dehydrogenase (ubiquinone) 1 alpha subcomplex, 9, 39kDa	gga00190:Oxidative phosphorylation,
GT_EA606_A_87_P261603	-1.6561	0.130964	NM_001006281	NDUFA9	NADH dehydrogenase (ubiquinone) 1 alpha subcomplex, 9, 39kDa	gga00190:Oxidative phosphorylation,
GT_EA606_A_87_P017375	-1.9006	0.0992763	NM_001031583	NDUFV1	NADH dehydrogenase (ubiquinone) flavoprotein 1, 51kDa	gga00190:Oxidative phosphorylation,
GT_EA606_A_87_P027942	-1.42785	0.13225	NM_001199561	IVD	isovaleryl Coenzyme A dehydrogenase	gga00280:Valine, leucine and isoleucine degradation,
GT_EA606_A_87_P036338	-1.41308	0.0840241	NM_001006511	ACADL	acyl-Coenzyme A dehydrogenase, long chain	gga00071:Fatty acid metabolism,gga03320:PPAR signaling pathway,
GT_EA606_A_87_P058116	-1.63789	0.13358	NM_001146332	NDUFS3	NADH dehydrogenase (ubiquinone) Fe-S protein 3, 30kDa (NADH-coenzyme Q reductase)	gga00190:Oxidative phosphorylation,
GT_EA606_A_87_P090916	-2.11776	0.159242	NM_001031583	NDUFV1	NADH dehydrogenase (ubiquinone) flavoprotein 1, 51kDa	gga00190:Oxidative phosphorylation,
GT_EA606_A_87_P134258	-1.62474	0.121832	ENSGALT00000040068	ACADL	acyl-Coenzyme A dehydrogenase, long chain	gga00071:Fatty acid metabolism,gga03320:PPAR signaling pathway,
GT_EA606_A_87_P146748	-2.30531	0.255169	XM_001232140	NDUFV2	similar to NADH dehydrogenase (ubiquinone) flavoprotein 2, 24kDa; NADH dehydrogenase (ubiquinone) flavoprotein 2, 24kDa	gga00190:Oxidative phosphorylation,
GT_EA606_A_87_P154533	-1.27353	0.0970415	ENSGALT00000002366	ACAD8	acyl-Coenzyme A dehydrogenase family, member 8	gga00280:Valine, leucine and isoleucine degradation,
GT_EA606_A_87_P164038	-1.52925	0.0386045	XM_418909	ALDH5A1	aldehyde dehydrogenase 5 family, member A1 (succinate-semialdehyde dehydrogenase)	gga00250:Alanine, aspartate and glutamate metabolism,gga00650:Butanoate metabolism,
GT_EA606_A_87_P199438	-1.77126	0.163642	NM_001146332	NDUFS3	NADH dehydrogenase (ubiquinone) Fe-S protein 3, 30kDa (NADH-coenzyme Q reductase)	gga00190:Oxidative phosphorylation,
GT_EA606_A_87_P234203	-1.31459	0.434562	NM_001199561	IVD	isovaleryl Coenzyme A dehydrogenase	gga00280:Valine, leucine and isoleucine degradation,
GT_EA606_A_87_P255813	-1.73541	0.120554	ENSGALT00000007523	ALDH2	aldehyde dehydrogenase 2 family (mitochondrial)	gga00010:Glycolysis / Gluconeogenesis,gga00053:Ascorbate and aldarate metabolism,gga00071:Fatty acid metabolism,gga00280:Valine, leucine and isoleucine degradation,gga00310:Lysine degradation,gga00330:Arginine and proline metabolism,gga00340:Histidine met
GT_EA606_A_87_P273008	-1.89336	0.145608	NM_001006511	ACADL	acyl-Coenzyme A dehydrogenase, long chain	gga00071:Fatty acid metabolism,gga03320:PPAR signaling pathway,
GT_EA606_A_87_P064496	-1.33831	0.161095	ENSGALT00000004964	SMAP2	small ArfGAP2	gga04144:Endocytosis,
GT_EA606_A_87_P031200	-1.31812	0.0857694	ENSGALT00000005892	RAPGEF1	Rap guanine nucleotide exchange factor (GEF) 1	gga04510:Focal adhesion,gga04910:Insulin signaling pathway,
GT_EA606_A_87_P118423	-1.60016	0.0291922	ENSGALT00000005892	RAPGEF1	Rap guanine nucleotide exchange factor (GEF) 1	gga04510:Focal adhesion,gga04910:Insulin signaling pathway,
GT_EA606_A_87_P003918	-1.74678	0.0725251	ENSGALT00000007631	PTGES2	prostaglandin E synthase 2	gga00590:Arachidonic acid metabolism,
GT_EA606_A_87_P007422	-1.37098	0.275703	ENSGALT00000018456	OXSM	3-oxoacyl-ACP synthase, mitochondrial	gga00061:Fatty acid biosynthesis,
GT_EA606_A_87_P009143	-1.68205	0.117401	NM_205365	GSTT1	glutathione S-transferase theta 1	gga00480:Glutathione metabolism,gga00980:Metabolism of xenobiotics by cytochrome P450,gga00982:Drug metabolism,
GT_EA606_A_87_P009212	-1.20351	0.105615	NM_204182	CKMT1A	creatine kinase, mitochondrial 1A	gga00330:Arginine and proline metabolism,
GT_EA606_A_87_P010026	-1.78465	0.118746	CV861736	NDUFA4	NADH dehydrogenase (ubiquinone) 1 alpha subcomplex, 4, 9kDa	gga00190:Oxidative phosphorylation,
GT_EA606_A_87_P011026	-1.95576	0.0263939	ENSGALT00000005561	AGPAT6	1-acylglycerol-3-phosphate O-acyltransferase 6 (lysophosphatidic acid acyltransferase, zeta)	gga00561:Glycerolipid metabolism,gga00564:Glycerophospholipid metabolism,gga00565:Ether lipid metabolism,
GT_EA606_A_87_P011731	-1.42764	0.0388118	CR523264	CA4	carbonic anhydrase IV	gga00910:Nitrogen metabolism,
GT_EA606_A_87_P012198	-1.22895	0.00251832	ENSGALT00000003500	ATP6V0D1	ATPase, H+ transporting, lysosomal 38kDa, V0 subunit d1	gga00190:Oxidative phosphorylation,gga04142:Lysosome,
GT_EA606_A_87_P015226	-1.85186	0.0581725	ENSGALT00000026714	HADHB	hydroxyacyl-Coenzyme A dehydrogenase/3-ketoacyl-Coenzyme A thiolase/enoyl-Coenzyme A hydratase (trifunctional protein), beta subunit	gga00062:Fatty acid elongation in mitochondria,gga00071:Fatty acid metabolism,gga00280:Valine, leucine and isoleucine degradation,
GT_EA606_A_87_P015299	-1.70715	0.192416	CR388696	TNFRSF13B	tumor necrosis factor receptor superfamily, member 13B	gga04060:Cytokine-cytokine receptor interaction,gga04672:Intestinal immune network for IgA production,
GT_EA606_A_87_P017366	-1.25638	0.0427697	CR354370	LSM5	LSM5 homolog, U6 small nuclear RNA associated (S. cerevisiae)	gga03018:RNA degradation,gga03040:Spliceosome,
GT_EA606_A_87_P017838	-2.16113	0.136891	NM_001097526	MYL10	myosin, light chain 10, regulatory	gga04510:Focal adhesion,gga04530:Tight junction,gga04810:Regulation of actin cytoskeleton,
GT_EA606_A_87_P018213	-1.34953	0.324571	CR353015	HS3ST2	heparan sulfate (glucosamine) 3-O-sulfotransferase 2	gga00534:Heparan sulfate biosynthesis,
GT_EA606_A_87_P020196	-2.25678	0.116362	ENSGALT00000009300	UQCRC1	ubiquinol-cytochrome c reductase core protein I	gga00190:Oxidative phosphorylation,gga04260:Cardiac muscle contraction,
GT_EA606_A_87_P021768	-2.43282	0.207946	BX936195	RPA3	replication protein A3, 14kDa	gga03030:DNA replication,gga03420:Nucleotide excision repair,gga03430:Mismatch repair,gga03440:Homologous recombination,
GT_EA606_A_87_P022351	-1.38185	0.0539365	ENSGALT00000006712	IL22RA1	interleukin 22 receptor, alpha 1	gga04060:Cytokine-cytokine receptor interaction,gga04630:Jak-STAT signaling pathway,
GT_EA606_A_87_P022777	-2.04094	0.00514793	BX934003	NCBP2	nuclear cap binding protein subunit 2, 20kDa	gga03040:Spliceosome,
GT_EA606_A_87_P023154	-1.74088	0.0969499	ENSGALT00000011489	UQCRQ	ubiquinol-cytochrome c reductase, complex III subunit VII, 9.5kDa	gga00190:Oxidative phosphorylation,gga04260:Cardiac muscle contraction,
GT_EA606_A_87_P024026	-1.29581	0.0357298	ENSGALT00000009633	MGLL	monoglyceride lipase	gga00561:Glycerolipid metabolism,
GT_EA606_A_87_P024193	-1.1851	0.102216	NM_001198782	COX7A2	cytochrome c oxidase subunit VIIa polypeptide 2 (liver)	gga00190:Oxidative phosphorylation,gga04260:Cardiac muscle contraction,
GT_EA606_A_87_P024304	-1.39211	0.0808389	ENSGALT00000003162	NDUFB6	NADH dehydrogenase (ubiquinone) 1 beta subcomplex, 6, 17kDa	gga00190:Oxidative phosphorylation,
GT_EA606_A_87_P029713	-1.83734	0.0921679	NM_001199170	NDUFV3	NADH dehydrogenase (ubiquinone) flavoprotein 3, 10kDa	gga00190:Oxidative phosphorylation,
GT_EA606_A_87_P030630	-1.24266	0.384844	ENSGALT00000001983	CLTCL1	clathrin, heavy chain-like 1	gga04142:Lysosome,gga04144:Endocytosis,
GT_EA606_A_87_P038137	-2.00899	0.276424	NM_204573	LOC395260	cgABP260	gga04010:MAPK signaling pathway,gga04510:Focal adhesion,
GT_EA606_A_87_P041348	-1.29283	0.0130229	ENSGALT00000007290	NDST1	N-deacetylase/N-sulfotransferase (heparan glucosaminyl) 1	gga00534:Heparan sulfate biosynthesis,
GT_EA606_A_87_P052616	-2.03908	0.0710036	NM_001080103	TNFRSF19	tumor necrosis factor receptor superfamily, member 19	gga04060:Cytokine-cytokine receptor interaction,
GT_EA606_A_87_P056036	-1.97951	0.00910337	NM_001130387	IFNGR1	interferon gamma receptor 1	gga04060:Cytokine-cytokine receptor interaction,gga04630:Jak-STAT signaling pathway,gga04650:Natural killer cell mediated cytotoxicity,
GT_EA606_A_87_P057077	-1.387	0.00309564	NM_001031124	UPRT	uracil phosphoribosyltransferase (FUR1) homolog (S. cerevisiae)	gga00240:Pyrimidine metabolism,
GT_EA606_A_87_P061626	-1.87424	0.111917	ENSGALT00000035203	NDUFA11	NADH dehydrogenase (ubiquinone) 1 alpha subcomplex, 11, 14.7kDa	gga00190:Oxidative phosphorylation,
GT_EA606_A_87_P066751	-1.11262	0.0638826	ENSGALT00000008605	CA4	carbonic anhydrase IV	gga00910:Nitrogen metabolism,
GT_EA606_A_87_P071691	-1.53928	0.200477	ENSGALT00000040258	HS3ST2	heparan sulfate (glucosamine) 3-O-sulfotransferase 2	gga00534:Heparan sulfate biosynthesis,
GT_EA606_A_87_P073541	-2.19981	0.129062	ENSGALT00000003585	MAPKAPK3	mitogen-activated protein kinase-activated protein kinase 3	gga04010:MAPK signaling pathway,gga04370:VEGF signaling pathway,
GT_EA606_A_87_P077291	-2.27212	0.0516266	ENSGALT00000007918	COL4A4	collagen, type IV, alpha 4	gga04510:Focal adhesion,gga04512:ECM-receptor interaction,
GT_EA606_A_87_P079481	-1.3994	0.0994567	ENSGALT00000038198	CPT2	carnitine palmitoyltransferase II	gga00071:Fatty acid metabolism,gga03320:PPAR signaling pathway,
GT_EA606_A_87_P082451	-1.27467	0.0717225	ENSGALT00000033212	PHOSPHO2	phosphatase, orphan 2	gga00750:Vitamin B6 metabolism,
GT_EA606_A_87_P084266	-1.2129	0.0073613	ENSGALT00000017615	DTX4	deltex homolog 4 (Drosophila)	gga04330:Notch signaling pathway,
GT_EA606_A_87_P084836	-1.60379	0.0686664	NM_001199665	GANC	glucosidase, alpha; neutral C	gga00052:Galactose metabolism,gga00500:Starch and sucrose metabolism,
GT_EA606_A_87_P093231	-2.78888	0.0426026	NM_001167744	CKMT2	creatine kinase, mitochondrial 2 (sarcomeric)	gga00330:Arginine and proline metabolism,
GT_EA606_A_87_P094483	-1.39141	0.000755178	NM_001031124	UPRT	uracil phosphoribosyltransferase (FUR1) homolog (S. cerevisiae)	gga00240:Pyrimidine metabolism,
GT_EA606_A_87_P101261	-1.15997	0.084078	ENSGALT00000012224	PDSS1	prenyl (decaprenyl) diphosphate synthase, subunit 1	gga00900:Terpenoid backbone biosynthesis,
GT_EA606_A_87_P101631	-1.54621	0.147348	ENSGALT00000017426	NDUFA4	NADH dehydrogenase (ubiquinone) 1 alpha subcomplex, 4, 9kDa	gga00190:Oxidative phosphorylation,
GT_EA606_A_87_P103368	-1.4134	0.112832	ENSGALT00000021376	DDC	dopa decarboxylase (aromatic L-amino acid decarboxylase)	gga00340:Histidine metabolism,gga00350:Tyrosine metabolism,gga00360:Phenylalanine metabolism,gga00380:Tryptophan metabolism,
GT_EA606_A_87_P112203	-1.71248	0.0261422	NM_204573	LOC395260	cgABP260	gga04010:MAPK signaling pathway,gga04510:Focal adhesion,
GT_EA606_A_87_P113463	-1.42394	0.12519	ENSGALT00000007514	ATP5J2	ATP synthase, H+ transporting, mitochondrial F0 complex, subunit F2	gga00190:Oxidative phosphorylation,
GT_EA606_A_87_P115073	-1.82537	0.118518	ENSGALT00000035203	NDUFA11	NADH dehydrogenase (ubiquinone) 1 alpha subcomplex, 11, 14.7kDa	gga00190:Oxidative phosphorylation,
GT_EA606_A_87_P124438	-1.09988	0.0400273	NM_001199665	GANC	glucosidase, alpha; neutral C	gga00052:Galactose metabolism,gga00500:Starch and sucrose metabolism,
GT_EA606_A_87_P125033	-1.15059	0.0932658	CR390611	MGLL	monoglyceride lipase	gga00561:Glycerolipid metabolism,
GT_EA606_A_87_P146798	-1.19145	0.108394	DR410805	COX4I1	cytochrome c oxidase subunit IV isoform 1	gga00190:Oxidative phosphorylation,gga04260:Cardiac muscle contraction,
GT_EA606_A_87_P147928	-1.52888	0.0508477	ENSGALT00000007386	ENDOG	endonuclease G	gga04210:Apoptosis,
GT_EA606_A_87_P151248	-1.40181	0.0474627	XM_415686	GNA13	guanine nucleotide binding protein (G protein), alpha 13	gga04270:Vascular smooth muscle contraction,gga04810:Regulation of actin cytoskeleton,
GT_EA606_A_87_P164508	-1.31182	0.237615	XM_001232890	WHSC1L1	similar to putative protein WHSC1L1l; Wolf-Hirschhorn syndrome candidate 1-like 1	gga00310:Lysine degradation,
GT_EA606_A_87_P164783	-2.15211	0.161268	ENSGALT00000003585	MAPKAPK3	mitogen-activated protein kinase-activated protein kinase 3	gga04010:MAPK signaling pathway,gga04370:VEGF signaling pathway,
GT_EA606_A_87_P166458	-2.0203	0.0603924	XM_419615	PARK2	Parkinson disease (autosomal recessive, juvenile) 2, parkin	gga04120:Ubiquitin mediated proteolysis,
GT_EA606_A_87_P190203	-1.49119	0.111675	ENSGALT00000003923	UQCRC2	ubiquinol-cytochrome c reductase core protein II	gga00190:Oxidative phosphorylation,gga04260:Cardiac muscle contraction,
GT_EA606_A_87_P193818	-1.11532	0.0646165	NM_204182	CKMT1A	creatine kinase, mitochondrial 1A	gga00330:Arginine and proline metabolism,
GT_EA606_A_87_P204278	-1.7853	0.0611722	CR388803	HADHB	hydroxyacyl-Coenzyme A dehydrogenase/3-ketoacyl-Coenzyme A thiolase/enoyl-Coenzyme A hydratase (trifunctional protein), beta subunit	gga00062:Fatty acid elongation in mitochondria,gga00071:Fatty acid metabolism,gga00280:Valine, leucine and isoleucine degradation,
GT_EA606_A_87_P206398	-2.16799	0.0586023	ENSGALT00000026714	HADHB	hydroxyacyl-Coenzyme A dehydrogenase/3-ketoacyl-Coenzyme A thiolase/enoyl-Coenzyme A hydratase (trifunctional protein), beta subunit	gga00062:Fatty acid elongation in mitochondria,gga00071:Fatty acid metabolism,gga00280:Valine, leucine and isoleucine degradation,
GT_EA606_A_87_P215118	-1.35161	0.0827802	NM_001030577	COX4I1	cytochrome c oxidase subunit IV isoform 1	gga00190:Oxidative phosphorylation,gga04260:Cardiac muscle contraction,
GT_EA606_A_87_P221423	-2.11078	0.0605041	ENSGALT00000013435	ANAPC1	anaphase promoting complex subunit 1	gga04110:Cell cycle,gga04114:Oocyte meiosis,gga04120:Ubiquitin mediated proteolysis,gga04914:Progesterone-mediated oocyte maturation,
GT_EA606_A_87_P226183	-1.3105	0.112943	ENSGALT00000024288	DDO	D-aspartate oxidase	gga00250:Alanine, aspartate and glutamate metabolism,
GT_EA606_A_87_P228333	-1.80195	0.132	ENSGALT00000026946	MUT	methylmalonyl Coenzyme A mutase	gga00280:Valine, leucine and isoleucine degradation,gga00640:Propanoate metabolism,
GT_EA606_A_87_P229233	-1.72496	0.0989786	ENSGALT00000009300	UQCRC1	ubiquinol-cytochrome c reductase core protein I	gga00190:Oxidative phosphorylation,gga04260:Cardiac muscle contraction,
GT_EA606_A_87_P238153	-2.03488	0.0173388	NM_001030385	EDC3	enhancer of mRNA decapping 3 homolog (S. cerevisiae)	gga03018:RNA degradation,
GT_EA606_A_87_P240133	-1.35863	0.205856	ENSGALT00000012114	LARS	leucyl-tRNA synthetase	gga00290:Valine, leucine and isoleucine biosynthesis,gga00970:Aminoacyl-tRNA biosynthesis,
GT_EA606_A_87_P243518	-1.62823	0.0566715	ENSGALT00000016604	ALDH6A1	aldehyde dehydrogenase 6 family, member A1	gga00280:Valine, leucine and isoleucine degradation,gga00562:Inositol phosphate metabolism,gga00640:Propanoate metabolism,
GT_EA606_A_87_P245483	-1.02732	0.0173545	NM_001030652	SNAP29	synaptosomal-associated protein, 29kDa	gga04130:SNARE interactions in vesicular transport,
GT_EA606_A_87_P246373	-2.18994	0.130816	ENSGALT00000009300	UQCRC1	ubiquinol-cytochrome c reductase core protein I	gga00190:Oxidative phosphorylation,gga04260:Cardiac muscle contraction,
GT_EA606_A_87_P252453	-3.65524	0.0507116	NM_001167744	CKMT2	creatine kinase, mitochondrial 2 (sarcomeric)	gga00330:Arginine and proline metabolism,
GT_EA606_A_87_P252708	-1.59799	0.327556	XM_001235299	AGPAT2	1-acylglycerol-3-phosphate O-acyltransferase 2 (lysophosphatidic acid acyltransferase, beta)	gga00561:Glycerolipid metabolism,gga00564:Glycerophospholipid metabolism,gga00565:Ether lipid metabolism,
GT_EA606_A_87_P255668	-1.96701	0.131329	ENSGALT00000003923	UQCRC2	ubiquinol-cytochrome c reductase core protein II	gga00190:Oxidative phosphorylation,gga04260:Cardiac muscle contraction,
GT_EA606_A_87_P266193	-1.20513	0.199362	CR352423	MPI	mannose phosphate isomerase	gga00051:Fructose and mannose metabolism,gga00520:Amino sugar and nucleotide sugar metabolism,
GT_EA606_A_87_P274433	-1.34181	0.184877	ENSGALT00000026654	PHKA2	phosphorylase kinase, alpha 2 (liver)	gga04020:Calcium signaling pathway,gga04910:Insulin signaling pathway,
GT_EA606_A_87_P276788	-2.73076	0.128407	ENSGALT00000026714	HADHB	hydroxyacyl-Coenzyme A dehydrogenase/3-ketoacyl-Coenzyme A thiolase/enoyl-Coenzyme A hydratase (trifunctional protein), beta subunit	gga00062:Fatty acid elongation in mitochondria,gga00071:Fatty acid metabolism,gga00280:Valine, leucine and isoleucine degradation,
GT_EA606_A_87_P277998	-1.29008	0.152896	ENSGALT00000001847	PCCB	propionyl Coenzyme A carboxylase, beta polypeptide	gga00280:Valine, leucine and isoleucine degradation,gga00640:Propanoate metabolism,
GT_EA606_A_87_P290238	-1.37899	0.191547	ENSGALT00000001847	PCCB	propionyl Coenzyme A carboxylase, beta polypeptide	gga00280:Valine, leucine and isoleucine degradation,gga00640:Propanoate metabolism,
GT_EA606_A_87_P298628	-1.10155	0.00371481	NM_001159754	TBL1X	transducin (beta)-like 1X-linked	gga04310:Wnt signaling pathway,
GT_EA606_A_87_P299463	-1.47493	0.119682	NM_205365	GSTT1	glutathione S-transferase theta 1	gga00480:Glutathione metabolism,gga00980:Metabolism of xenobiotics by cytochrome P450,gga00982:Drug metabolism,
GT_EA606_A_87_P308495	-2.05493	0.00908484	NM_204573	LOC395260	cgABP260	gga04010:MAPK signaling pathway,gga04510:Focal adhesion,
GT_EA606_A_87_P313647	-3.53366	0.045123	NM_001167744	CKMT2	creatine kinase, mitochondrial 2 (sarcomeric)	gga00330:Arginine and proline metabolism,
